# Supplementary material for: Comparative Analyses of the Digestive Tract Microbiota of New Guinean Passerine Birds
Source: Front Microbiol. 2018 Aug 10;9:1830. doi: 10.3389/fmicb.2018.01830 (PMC6097311; doi:10.3389/fmicb.2018.01830)
Supplement: Supplementary file 2 [file Data_Sheet_1.ZIP › Supplementary tables_Bodawatta_etal.2018.xls]

## Sheet: Table S2_Summary 
Key	Sampling localities		Digestive tract compartment			Other important information
	WT	Wilhelm transect	S	Stomach		Used samples = 2500 or more sequences
	WS	Wananag Swire station	SIB	Small Intestine Beginning		Not good rarefraction curves are the ones that did not reach a plateau
	H	Huon Peninsula	SIM	Small Intestine Middle		Highlighted samples = samples that used in final analysis
	PNG	Papua New Guinea	CC	Cecum and Illium
			LI	Large Intestine
			C	Cloaca
Sample ID	Content	Bird species	Replicate	Collection date	Collection location	Date sent for MiSeq	MiSeq success	# sequences	Richness	Good Rarefraction curve?	Inverse Simpson's diversity index	Museum IDs	Notes
Cm_1R	Regurgitated sample	Colluricincla megharhyncha	1	2010	700m, WT, PNG	16/12/17	Unsuccessful
Cm_2R	Regurgitated sample	Colluricincla megharhyncha	2	2010	200m, WT, PNG	16/12/17	Successful	28453	79	Good	1.99389
Cm_3R	Regurgitated sample	Colluricincla megharhyncha	3	2012	200m, WT, PNG	16/12/17	Successful	232485	828	Good	3.78537
Cm_1S	S	Colluricincla megharhyncha	1	2015	1200m, WT, PNG	16/12/17	Successful	9225	89	Good	1.28916	145.436
Cm_1SIB	SIB	Colluricincla megharhyncha	1	2015	1200m, WT, PNG	16/12/17	Successful	9125	129	Good	1.20846	145.436
Cm_1SIM	SIM	Colluricincla megharhyncha	1	2015	1200m, WT, PNG	16/12/17	Successful	60015	270	Good	3.50227	145.436
Cm_1CC	CC	Colluricincla megharhyncha	1	2015	1200m, WT, PNG	16/12/17	Successful	40192	652	Good	10.1178	145.436
Cm_1LI	LI	Colluricincla megharhyncha	1	2015	1200m, WT, PNG	16/12/17	Successful	5557	337	Good	5.62128	145.436
Cm_1C	C	Colluricincla megharhyncha	1	2015	1200m, WT, PNG	16/12/17	Successful	5349	329	Good	1.7684	145.436
Cm_2S	S	Colluricincla megharhyncha	2	2015	200m, WS, PNG	16/12/17	Successful	8384	86	Good	1.88339	145.415
Cm_2SIB	SIB	Colluricincla megharhyncha	2	2015	200m, WS, PNG	16/12/17	Successful	18198	96	Good	1.86169	145.415
Cm_2SIM	SIM	Colluricincla megharhyncha	2	2015	200m, WS, PNG	16/12/17	Successful	75078	135	Good	4.94241	145.415
Cm_2CC	CC	Colluricincla megharhyncha	2	2015	200m, WS, PNG	16/12/17	Successful	119530	317	Good	1.43648	145.415
Cm_2LI	LI	Colluricincla megharhyncha	2	2015	200m, WS, PNG	16/12/17	Successful	78175	236	Good	13.1596	145.415
Cm_2C	C	Colluricincla megharhyncha	2	2015	200m, WS, PNG	16/12/17	Successful	2219	268	Not good	N/A	145.415
Cr_1R	Regurgitated sample	Crateroscelis robusta	1	2010	2700m, WT, PNG	2017-08-08	Unsuccessful
Cr_2R	Regurgitated sample	Crateroscelis robusta	2	2010	2700m, WT, PNG	2017-08-08	Unsuccessful
Cr_3R	Regurgitated sample	Crateroscelis robusta	3	2010	2700m, WT, PNG	2017-08-08	Unsuccessful
Cr_4R	Regurgitated sample	Crateroscelis robusta	4	2010	2700m, WT, PNG	16/12/17	Unsuccessful
Cr_5R	Regurgitated sample	Crateroscelis robusta	5	2012	2700m, WT, PNG	16/12/17	Successful	36361	152	Good	2.02956
Cr_6R	Regurgitated sample	Crateroscelis robusta	6	2012	2700m, WT, PNG	16/12/17	Unsuccessful
Cr_1S	S	Crateroscelis robusta	1	2015	1700m, WT, PNG	2017-08-08	Successful	49133	318	Good	1.07565	145.458
Cr_1SIB	SIB	Crateroscelis robusta	1	2015	1700m, WT, PNG	2017-08-08	Unsuccessful					145.458
Cr_1SIM	SIM	Crateroscelis robusta	1	2015	1700m, WT, PNG	2017-08-08	Successful	41258	248	Good	1.06741	145.458
Cr_1CC	CC	Crateroscelis robusta	1	2015	1700m, WT, PNG	2017-08-08	Successful	58951	695	Good	1.1457	145.458
Cr_1LI	LI	Crateroscelis robusta	1	2015	1700m, WT, PNG	2017-08-08	Successful	58735	406	Good	1.07544	145.458
Cr_1C	C	Crateroscelis robusta	1	2015	1700m, WT, PNG	8/8/2017 and 16/12/17	Successful	39403	326	Good	2.48736	145.458	Amplified second round
Cr_2S	S	Crateroscelis robusta	2	2015	2700m, WT, PNG	2017-08-08	Successful	50084	381	Good	1.09563	145.433
Cr_2SIB	SIB	Crateroscelis robusta	2	2015	2700m, WT, PNG	2017-08-08	Successful	34019	187	Good	1.05859	145.433
Cr_2SIM	SIM	Crateroscelis robusta	2	2015	2700m, WT, PNG	2017-08-08	Successful	57977	635	Good	1.14707	145.433
Cr_2CC	CC	Crateroscelis robusta	2	2015	2700m, WT, PNG	2017-08-08	Successful	45820	592	Good	1.17794	145.433
Cr_2LI	LI	Crateroscelis robusta	2	2015	2700m, WT, PNG	2017-08-08	Successful	48602	744	Good	1.33154	145.433
Cr_2C	C	Crateroscelis robusta	2	2015	2700m, WT, PNG	2017-08-08	Successful	49500	268	Good	1.10853	145.433
Cr_3S	S	Crateroscelis robusta	3	2015	1700m, WT, PNG	2017-08-08	Successful	3584	60	Good	1.05267	145.46
Cr_3SIB	SIB	Crateroscelis robusta	3	2015	1700m, WT, PNG	2017-08-08	Unsuccessful					145.46
Cr_3SIM	SIM	Crateroscelis robusta	3	2015	1700m, WT, PNG	2017-08-08	Successful	7836	64	Good	1.03928	145.46
Cr_3CC	CC	Crateroscelis robusta	3	2015	1700m, WT, PNG	8/8/2017 and 16/12/17	Successful	44989	234	Good	1.74324	145.46	Amplified second round
Cr_3LI	LI	Crateroscelis robusta	3	2015	1700m, WT, PNG	2017-08-08	Successful	5110	66	Good	1.09197	145.46
Cr_3C	C	Crateroscelis robusta	3	2015	1700m, WT, PNG	2017-08-08	Successful	12000	156	Good	1.12434	145.46
Cr_4S	S	Crateroscelis robusta	4	2016	2900M, H, PNG	16/12/17	Successful	30530	73	Good	1.90121	PZM_1-12.09.2016
Cr_4SIB	SIB	Crateroscelis robusta	4	2016	2900M, H, PNG	16/12/17	Successful	54275	33	Good	1.35507	PZM_1-12.09.2017
Cr_4SIM	SIM	Crateroscelis robusta	4	2016	2900M, H, PNG	16/12/17	Successful	142763	246	Good	2.1645	PZM_1-12.09.2018
Cr_4CC	CC	Crateroscelis robusta	4	2016	2900M, H, PNG	16/12/17	Successful	112411	203	Good	2.43443	PZM_1-12.09.2019
Cr_4LI	LI	Crateroscelis robusta	4	2016	2900M, H, PNG	16/12/17	Successful	77742	89	Good	2.14394	PZM_1-12.09.2020
Cr_4C	C	Crateroscelis robusta	4	2016	2900M, H, PNG	16/12/17	Successful	109775	109	Good	2.14249	PZM_1-12.09.2021
Ik_1R	Regurgitated sample	Ifrita kowaldi	1	2010	2700m, WT, PNG	16/12/17	Unsuccessful
Ik_2R	Regurgitated sample	Ifrita kowaldi	2	2010	2700m, WT, PNG	16/12/17	Successful	173016	217	Good	49.1691
Ik_3R	Regurgitated sample	Ifrita kowaldi	3	2010	2700m, WT, PNG	16/12/17	Unsuccessful
Ik_1S	S	Ifrita kowaldi	1	2016	2950m, H, PNG	16/12/17	Successful	160288	1446	Good	28.3141	KAJ_2-15.09.2016
Ik_1SIB	SIB	Ifrita kowaldi	1	2016	2950m, H, PNG	16/12/17	Successful	219282	659	Good	26.6155	KAJ_2-15.09.2017
Ik_1SIM	SIM	Ifrita kowaldi	1	2016	2950m, H, PNG	16/12/17	Successful	175716	522	Good	28.065	KAJ_2-15.09.2018
Ik_1CC	CC	Ifrita kowaldi	1	2016	2950m, H, PNG	16/12/17	Successful	261625	1000	Good	24.0934	KAJ_2-15.09.2019
Ik_1LI	LI	Ifrita kowaldi	1	2016	2950m, H, PNG	16/12/17	Successful	26958	229	Good	26.1457	KAJ_2-15.09.2020
Ik_1C	C	Ifrita kowaldi	1	2016	2950m, H, PNG	16/12/17	Successful	186356	1281	Good	48.8486	KAJ_2-15.09.2021
Mn_1R	Regurgitated sample	Melanocharis nigra	1	2010	700m, WT, PNG	2017-08-08	Unsuccessful
Mn_2R	Regurgitated sample	Melanocharis nigra	2	2010	1200m, WT, PNG	2017-08-08	Unsuccessful
Mn_3R	Regurgitated sample	Melanocharis nigra	3	2010	1200m, WT, PNG	2017-08-08	Unsuccessful
Mn_4R	Regurgitated sample	Melanocharis nigra	4	2010	200m, WT, PNG	16/12/17	Successful	14234	801	Good	97.0103
Mn_5R	Regurgitated sample	Melanocharis nigra	5	2012	700m, WT, PNG	16/12/17	Successful	79629	556	Good	1.37888
Mn_6R	Regurgitated sample	Melanocharis nigra	6	2013	700m, WT, PNG	16/12/17	Unsuccessful
Mn_1S	S	Melanocharis nigra	1	2015	1200m, WT, PNG	2017-08-08	Unsuccessful					145.474
Mn_1SIB	SIB	Melanocharis nigra	1	2015	1200m, WT, PNG	2017-08-08	Successful	11911	386	Good	18.5485	145.474
Mn_1SIM	SIM	Melanocharis nigra	1	2015	1200m, WT, PNG	2017-08-08	Successful	5760	210	Good	7.24216	145.474
Mn_1CC	CC	Melanocharis nigra	1	2015	1200m, WT, PNG	2017-08-08	Successful	10891	320	Good	22.2855	145.474
Mn_1LI	LI	Melanocharis nigra	1	2015	1200m, WT, PNG	2017-08-08	Successful	13764	415	Good	23.4819	145.474
Mn_1C	C	Melanocharis nigra	1	2015	1200m, WT, PNG	2017-08-08	Unsuccessful	827	210	Not good	N/A	145.474
Mn_2S	S	Melanocharis nigra	2	2015	200m, WT, PNG	2017-08-08	Unsuccessful	1974	82	Not good	N/A	145.451
Mn_2SIB	SIB	Melanocharis nigra	2	2015	200m, WT, PNG	2017-08-08	Successful	2778	168	Good	1.47839	145.451
Mn_2SIM	SIM	Melanocharis nigra	2	2015	200m, WT, PNG	2017-08-08	Successful	2032	160	Not good	N/A	145.451
Mn_2CC	CC	Melanocharis nigra	2	2015	200m, WT, PNG	2017-08-08	Unsuccessful					145.451
Mn_2LI	LI	Melanocharis nigra	2	2015	200m, WT, PNG	2017-08-08	Successful	618	150	Not good	N/A	145.451
Mn_2C	C	Melanocharis nigra	2	2015	200m, WT, PNG	2017-08-08	Successful	3891	152	Good	1.19453	145.451
Mn_3S	S	Melanocharis nigra	3	2015	200m, WT, PNG	2017-08-08	Successful	19410	69	Good	1.01324	145.445
Mn_3SIB	SIB	Melanocharis nigra	3	2015	200m, WT, PNG	2017-08-08	Successful	30890	77	Good	1.01168	145.445
Mn_3SIM	SIM	Melanocharis nigra	3	2015	200m, WT, PNG	2017-08-08	Successful	17423	77	Good	1.0207	145.445
Mn_3CC	CC	Melanocharis nigra	3	2015	200m, WT, PNG	2017-08-08	Unsuccessful					145.445
Mn_3LI	LI	Melanocharis nigra	3	2015	200m, WT, PNG	2017-08-08	Successful	21391	213	Good	1.51562	145.445
Mn_3C	C	Melanocharis nigra	3	2015	200m, WT, PNG	2017-08-08	Unsuccessful					145.445
Mv_1R	Regurgitated sample	Melanocharis versteri	1	2010	1700m, WT, PNG	2017-08-08	Successful	63031	293	Good	1.05788
Mv_2R	Regurgitated sample	Melanocharis versteri	2	2010	2700m, WT, PNG	2017-08-08	Successful	26858	1220	Good	71.8631
Mv_3R	Regurgitated sample	Melanocharis versteri	3	2010	2700m, WT, PNG	2017-08-08	Unsuccessful
Mv_4R	Regurgitated sample	Melanocharis versteri	4	2010	2700m, WT, PNG	16/12/17	Successful	19650	320	Good	7.95785
Mv_5R	Regurgitated sample	Melanocharis versteri	5	2010	2700m, WT, PNG	16/12/17	Successful	176489	2677	Good	14.9448
Mv_6R	Regurgitated sample	Melanocharis versteri	6	2010	2700m, WT, PNG	16/12/17	Unsuccessful
Mv_1S	S	Melanocharis versteri	1	2015	1700m, WT, PNG	8/8/2017 and 16/12/17	Successful	105647	387	Good	31.9503	145.481	Amplified in second round
Mv_1SIB	SIB	Melanocharis versteri	1	2015	1700m, WT, PNG	8/8/2017 and 16/12/17	Successful	129649	458	Good	64.3755	145.481	Amplified in second round
Mv_1SIM	SIM	Melanocharis versteri	1	2015	1700m, WT, PNG	2017-08-08	Unsuccessful					145.481
Mv_1CC	CC	Melanocharis versteri	1	2015	1700m, WT, PNG	2017-08-08	Unsuccessful					145.481
Mv_1LI	LI	Melanocharis versteri	1	2015	1700m, WT, PNG	8/8/2017 and 16/12/17	Successful	3902	218	Good	53.8018	145.481	Amplified in second round
Mv_1C	C	Melanocharis versteri	1	2015	1700m, WT, PNG	8/8/2017 and 16/12/17	Successful	13432	252	Good	69.9123	145.481	Amplified in second round
Mv_2S	S	Melanocharis versteri	2	2015	1700m, WT, PNG	2017-08-08	Unsuccessful					145.48
Mv_2SIB	SIB	Melanocharis versteri	2	2015	1700m, WT, PNG	2017-08-08	Unsuccessful					145.48
Mv_2SIM	SIM	Melanocharis versteri	2	2015	1700m, WT, PNG	2017-08-08	Unsuccessful					145.48
Mv_2CC	CC	Melanocharis versteri	2	2015	1700m, WT, PNG	2017-08-08	Successful	932	135	Not good	N/A	145.48
Mv_2LI	LI	Melanocharis versteri	2	2015	1700m, WT, PNG	2017-08-08	Successful	2588	69	Good	1.10395	145.48
Mv_2C	C	Melanocharis versteri	2	2015	1700m, WT, PNG	2017-08-08	Successful	3641	124	Good	1.97669	145.48
Mv_3S	S	Melanocharis versteri	3	2015	2700m, WT, PNG	2017-08-08	Unsuccessful					145.492
Mv_3SIB	SIB	Melanocharis versteri	3	2015	2700m, WT, PNG	2017-08-08	Unsuccessful					145.492
Mv_3SIM	SIM	Melanocharis versteri	3	2015	2700m, WT, PNG	2017-08-08	Unsuccessful					145.492
Mv_3CC	CC	Melanocharis versteri	3	2015	2700m, WT, PNG	2017-08-08	Unsuccessful					145.492
Mv_3LI	LI	Melanocharis versteri	3	2015	2700m, WT, PNG	2017-08-08	Unsuccessful					145.492
Mv_3C	C	Melanocharis versteri	3	2015	2700m, WT, PNG	2017-08-08	Successful	5232	139	Good	1.30385	145.492
Mv_4S	S	Melanocharis versteri	4	2015	2700m, WT, PNG	16/12/17	Successful	23635	147	Good	3.61856	145.457
Mv_4SIB	SIB	Melanocharis versteri	4	2015	2700m, WT, PNG	16/12/17	Unsuccessful					145.457
Mv_4SIM	SIM	Melanocharis versteri	4	2015	2700m, WT, PNG	16/12/17	Unsuccessful					145.457
Mv_4CC	CC	Melanocharis versteri	4	2015	2700m, WT, PNG	16/12/17	Successful	3616	158	Good	25.5161	145.457
Mv_4LI	LI	Melanocharis versteri	4	2015	2700m, WT, PNG	16/12/17	Successful	12354	261	Good	24.4733	145.457
Mv_4C	C	Melanocharis versteri	4	2015	2700m, WT, PNG	16/12/17	Successful	564	112	Not good	N/A	145.457
Mf_1R	Regurgitated sample	Melipotes fumigatus	1		2700m, WT, PNG	2017-08-08	Unsuccessful
Mf_2R	Regurgitated sample	Melipotes fumigatus	2		2700m, WT, PNG	2017-08-08	Unsuccessful
Mf_3R	Regurgitated sample	Melipotes fumigatus	3		2700m, WT, PNG	2017-08-08	Unsuccessful
Mf_4R	Regurgitated sample	Melipotes fumigatus	4		2700m, WT, PNG	16/12/17	Unsuccessful
Mf_5R	Regurgitated sample	Melipotes fumigatus	5		2700m, WT, PNG	16/12/17	Unsuccessful
Mf_6R	Regurgitated sample	Melipotes fumigatus	6		2700m, WT, PNG	16/12/17	Unsuccessful
Mf_1S	S	Melipotes fumigatus	1	2015	1700m, WT, PNG	2017-08-08	Unsuccessful					145.428
Mf_1SIB	SIB	Melipotes fumigatus	1	2015	1700m, WT, PNG	2017-08-08	Unsuccessful					145.428
Mf_1SIM	SIM	Melipotes fumigatus	1	2015	1700m, WT, PNG	2017-08-08	Unsuccessful					145.428
Mf_1CC	CC	Melipotes fumigatus	1	2015	1700m, WT, PNG	2017-08-08	Unsuccessful					145.428
Mf_1LI	LI	Melipotes fumigatus	1	2015	1700m, WT, PNG	2017-08-08	Unsuccessful					145.428
Mf_1C	C	Melipotes fumigatus	1	2015	1700m, WT, PNG	8/8/2017 16/12/17	Successful	26996	368	Good	44.3682	145.428	Amplified in second round
Mf_2S	S	Melipotes fumigatus	2	2015	1700m, WT, PNG	8/8/2017 16/12/18	Successful	529	114	Not good	N/A	145.43
Mf_2SIB	SIB	Melipotes fumigatus	2	2015	1700m, WT, PNG	8/8/2017 16/12/19	Successful	34203	177	Good	15.9398	145.43	Amplified in second round
Mf_2SIM	SIM	Melipotes fumigatus	2	2015	1700m, WT, PNG	8/8/2017 16/12/20	Successful	38112	151	Good	33.5734	145.43	Amplified in second round
Mf_2CC	CC	Melipotes fumigatus	2	2015	1700m, WT, PNG	8/8/2017 16/12/21	Successful	17133	211	Good	42.3223	145.43	Amplified in second round
Mf_2LI	LI	Melipotes fumigatus	2	2015	1700m, WT, PNG	2017-08-08	Unsuccessful					145.43
Mf_2C	C	Melipotes fumigatus	2	2015	1700m, WT, PNG	8/8/2017 and 16/12/17	Successful	33641	317	Good	37.4455	145.43	Amplified in second round
Mf_3S	S	Melipotes fumigatus	3	2015	1700m, WT, PNG	8/8/2017 and 16/12/18	Successful	1237	137	Not good	N/A	145.421
Mf_3SIB	SIB	Melipotes fumigatus	3	2015	1700m, WT, PNG	8/8/2017 and 16/12/19	Successful	11705	329	Good	4.8352	145.421
Mf_3SIM	SIM	Melipotes fumigatus	3	2015	1700m, WT, PNG	2017-08-08	Unsuccessful					145.421
Mf_3CC	CC	Melipotes fumigatus	3	2015	1700m, WT, PNG	8/8/2017 and 16/12/19	Successful	78935	333	Good	40.8136	145.421
Mf_3LI	LI	Melipotes fumigatus	3	2015	1700m, WT, PNG	8/8/2017 and 16/12/19	Successful	36604	255	Good	14.9552	145.421
Mf_3C	C	Melipotes fumigatus	3	2015	1700m, WT, PNG	2017-08-08	Unsuccessful					145.421
Ra_1R	Regurgitated sample	Rhipidura atra	1		1200m, WT, PNG	2017-08-08	Unsuccessful
Ra_2R	Regurgitated sample	Rhipidura atra	2		1700m, WT, PNG	2017-08-08	Unsuccessful
Ra_3R	Regurgitated sample	Rhipidura atra	3		1700m, WT, PNG	2017-08-08	Unsuccessful
Ra_4R	Regurgitated sample	Rhipidura atra	4		1700m, WT, PNG	16/12/17	Unsuccessful
Ra_5R	Regurgitated sample	Rhipidura atra	5		1700m, WT, PNG	16/12/17	Unsuccessful
Ra_6R	Regurgitated sample	Rhipidura atra	6		2700m, WT, PNG	16/12/17	Successful	32743	478	Good	3.1179
Ra_1S	S	Rhipidura atra	1	2015	1700, WT, PNG	8/8/2017 and 16/12/17	Successful	119610	225	Good	1.14529	145.476	Amplified in second round
Ra_1SIB	SIB	Rhipidura atra	1	2015	1700, WT, PNG	8/8/2017 and 16/12/17	Successful	1043	54	Not good	N/A	145.476	Amplified in second round
Ra_1SIM	SIM	Rhipidura atra	1	2015	1700, WT, PNG	8/8/2017 and 16/12/17	Successful	12884	213	Good	4.22491	145.476	Amplified in second round
Ra_1CC	CC	Rhipidura atra	1	2015	1700, WT, PNG	8/8/2017 and 16/12/17	Successful	80175	458	Good	4.80502	145.476	Amplified in second round
Ra_1LI	LI	Rhipidura atra	1	2015	1700, WT, PNG	8/8/2017 and 16/12/17	Successful	112742	395	Good	3.96717	145.476	Amplified in second round
Ra_1C	C	Rhipidura atra	1	2015	1700, WT, PNG	8/8/2017 and 16/12/17	Successful	114353	484	Good	6.59852	145.476	Amplified in second round
Ra_2S	S	Rhipidura atra	2	2015	1700m, WT, PNG	2017-08-08	Successful	27395	375	Good	20.4021	145.446
Ra_2SIB	SIB	Rhipidura atra	2	2015	1700m, WT, PNG	2017-08-08	Unsuccessful					145.446
Ra_2SIM	SIM	Rhipidura atra	2	2015	1700m, WT, PNG	2017-08-08	Unsuccessful					145.446
Ra_2CC	CC	Rhipidura atra	2	2015	1700m, WT, PNG	2017-08-08	Successful	104982	546	Good	17.3156	145.446
Ra_2LI	LI	Rhipidura atra	2	2015	1700m, WT, PNG	2017-08-08	Successful	36892	486	Good	16.2148	145.446
Ra_2C	C	Rhipidura atra	2	2015	1700m, WT, PNG	2017-08-08	Successful	8752	268	Good	27.9112	145.446
Ra_3S	S	Rhipidura atra	3	2015	1700m, WT, PNG	2017-08-08	Successful	33409	175	Good	1.11566	145.483
Ra_3SIB	SIB	Rhipidura atra	3	2015	1700m, WT, PNG	2017-08-08	Unsuccessful					145.483
Ra_3SIM	SIM	Rhipidura atra	3	2015	1700m, WT, PNG	2017-08-08	Successful	13824	147	Good	1.46591	145.483
Ra_3CC	CC	Rhipidura atra	3	2015	1700m, WT, PNG	2017-08-08	Successful	36413	202	Good	1.79819	145.483
Ra_3LI	LI	Rhipidura atra	3	2015	1700m, WT, PNG	2017-08-08	Successful	47757	175	Good	1.51832	145.483
Ra_3C	C	Rhipidura atra	3	2015	1700m, WT, PNG	2017-08-08	Successful	35107	193	Good	1.27126	145.483
Ra_4S	S	Rhipidura atra	4	2015	1700m, WT, PNG	16/12/17	Successful	41867	164	Good	1.19991	145.468
Ra_4SIB	SIB	Rhipidura atra	4	2015	1700m, WT, PNG	16/12/17	Successful	51024	282	Good	1.70336	145.468
Ra_4SIM	SIM	Rhipidura atra	4	2015	1700m, WT, PNG	16/12/17	Successful	78175	296	Good	1.14685	145.468
Ra_4CC	CC	Rhipidura atra	4	2015	1700m, WT, PNG	16/12/17	Successful	73156	378	Good	2.60087	145.468
Ra_4LI	LI	Rhipidura atra	4	2015	1700m, WT, PNG	16/12/17	Successful	74317	350	Good	1.48494	145.468
Ra_4C	C	Rhipidura atra	4	2015	1700m, WT, PNG	16/12/17	Successful	2904	190	Good	4.13122	145.468
Sn_1R	Regurgitated sample	Sericornis nouhuysi	1		1700m, WT, PNG	2017-08-08	Successful	24288	595	Good	2.30928
Sn_2R	Regurgitated sample	Sericornis nouhuysi	2		1700m, WT, PNG	2017-08-08	Unsuccessful
Sn_3R	Regurgitated sample	Sericornis nouhuysi	3		2700m, WT, PNG	2017-08-08	Successful	36372	385	Good	4.65667
Sn_4R	Regurgitated sample	Sericornis nouhuysi	4		2700m, WT, PNG	16/12/17	Unsuccessful
Sn_5R	Regurgitated sample	Sericornis nouhuysi	5		2700m, WT, PNG	16/12/17	Successful	42158	96	Good	3.13417
Sn_6R	Regurgitated sample	Sericornis nouhuysi	6		2700m, WT, PNG	16/12/17	Successful	6667	274	Good	4.04512
Sn_1S	S	Sericornis nouhuysi	1	2015	1700m, WT, PNG	2017-08-08	Successful	1171	27	Not good		145.493
Sn_1SIB	SIB	Sericornis nouhuysi	1	2015	1700m, WT, PNG	2017-08-08	Successful	17670	120	Good	1.06737	145.493
Sn_1SIM	SIM	Sericornis nouhuysi	1	2015	1700m, WT, PNG	2017-08-08	Successful	3266	29	Good	1.17992	145.493
Sn_1CC	CC	Sericornis nouhuysi	1	2015	1700m, WT, PNG	2017-08-08	Successful	11628	45	Good	1.83759	145.493
Sn_1LI	LI	Sericornis nouhuysi	1	2015	1700m, WT, PNG	2017-08-08	Successful	7533	114	Good	1.87905	145.493
Sn_1C	C	Sericornis nouhuysi	1	2015	1700m, WT, PNG	2017-08-08	Successful	1362	24	Not good		145.493
Sn_2S	S	Sericornis nouhuysi	2	2015	2700m, WT, PNG	2017-08-08	Unsuccessful					145.461
Sn_2SIB	SIB	Sericornis nouhuysi	2	2015	2700m, WT, PNG	2017-08-08	Successful	22983	288	Good	1.20498	145.461
Sn_2SIM	SIM	Sericornis nouhuysi	2	2015	2700m, WT, PNG	2017-08-08	Successful	38581	386	Good	2.0582	145.461
Sn_2CC	CC	Sericornis nouhuysi	2	2015	2700m, WT, PNG	2017-08-08	Successful	37577	449	Good	2.13303	145.461
Sn_2LI	LI	Sericornis nouhuysi	2	2015	2700m, WT, PNG	2017-08-08	Successful	91039	788	Good	2.024	145.461
Sn_2C	C	Sericornis nouhuysi	2	2015	2700m, WT, PNG	2017-08-08	Successful	71720	517	Good	1.82918	145.461
Sn_3S	S	Sericornis nouhuysi	3	2015	2700m, WT, PNG	2017-08-08	Unsuccessful					145.44
Sn_3SIB	SIB	Sericornis nouhuysi	3	2015	2700m, WT, PNG	2017-08-08	Unsuccessful					145.44
Sn_3SIM	SIM	Sericornis nouhuysi	3	2015	2700m, WT, PNG	2017-08-08	Successful	44403	866	Good	27.4791	145.44
Sn_3CC	CC	Sericornis nouhuysi	3	2015	2700m, WT, PNG	2017-08-08	Successful	8024	597	Not good	40.7464	145.44
Sn_3LI	LI	Sericornis nouhuysi	3	2015	2700m, WT, PNG	2017-08-08	Successful	20263	658	Not good	23.3735	145.44
Sn_3C	C	Sericornis nouhuysi	3	2015	2700m, WT, PNG	2017-08-08	Successful					145.44
Sn_4S	S	Sericornis nouhuysi	4	2015	1700m, WT, PNG	16/12/17	Successful	2293	45	Not good	N/A	145.465
Sn_4SIB	SIB	Sericornis nouhuysi	4	2015	1700m, WT, PNG	16/12/17	Successful	88944	484	Good	1.14664	145.465
Sn_4SIM	SIM	Sericornis nouhuysi	4	2015	1700m, WT, PNG	16/12/17	Successful	75133	349	Good	1.20361	145.465
Sn_4CC	CC	Sericornis nouhuysi	4	2015	1700m, WT, PNG	16/12/17	Successful	92929	350	Good	1.14115	145.465
Sn_4LI	LI	Sericornis nouhuysi	4	2015	1700m, WT, PNG	16/12/17	Successful	115835	644	Good	1.31434	145.465
Sn_4C	C	Sericornis nouhuysi	4	2015	1700m, WT, PNG	16/12/17	Successful	2065	58	Not good	N/A	145.465
Sn_5S	S	Sericornis nouhuysi	5	2016	Huon, PNG	16/12/17	Successful	103472	205	Good	1.01798	PZM1-11.09.2016
Sn_5SIB	SIB	Sericornis nouhuysi	5	2016	Huon, PNG	16/12/17	Successful	2089	53	Not good	N/A	PZM1-11.09.2016
Sn_5SIM	SIM	Sericornis nouhuysi	5	2016	Huon, PNG	16/12/17	Successful	17431	76	Good	1.06915	PZM1-11.09.2016
Sn_5CC	CC	Sericornis nouhuysi	5	2016	Huon, PNG	16/12/17	Successful	17618	136	Good	1.30986	PZM1-11.09.2016
Sn_5LI	LI	Sericornis nouhuysi	5	2016	Huon, PNG	16/12/17	Successful	29869	389	Good	1.34102	PZM1-11.09.2016
Sn_5C	C	Sericornis nouhuysi	5	2016	Huon, PNG	16/12/17	Successful	20035	178	Good	1.10472	PZM1-11.09.2016
Tp_1R	Regurgitated sample	Toxorhamphus poliopterus	1		2200m, WT, PNG	2017-08-08	Successful	37812	1309	Good	3.75786
Tp_2R	Regurgitated sample	Toxorhamphus poliopterus	2		1700m, WT, PNG	2017-08-08	Successful	81290	244	Good
Tp_3R	Regurgitated sample	Toxorhamphus poliopterus	3		1700m, WT, PNG	2017-08-08	Unsuccessful
Tp_4R	Regurgitated sample	Toxorhamphus poliopterus	4		1200m, WT, PNG	16/12/17	Successful	115512	4017	Good	11.7885
Tp_5R	Regurgitated sample	Toxorhamphus poliopterus	5		1700m, WT, PNG	16/12/17	Successful	131650	169	Good	4.63196
Tp_6R	Regurgitated sample	Toxorhamphus poliopterus	6		1700m, WT, PNG	16/12/17	Unsuccessful
Tp_1S	S	Toxorhamphus poliopterus	1	2015	1200m, WT, PNG	2017-08-08	Unsuccessful					145.456
Tp_1SIB	SIB	Toxorhamphus poliopterus	1	2015	1200m, WT, PNG	2017-08-08	Successful	50598	251	Good	8.1836	145.456
Tp_1SIM	SIM	Toxorhamphus poliopterus	1	2015	1200m, WT, PNG	2017-08-08	Successful	22010	39	Good	1.95266	145.456
Tp_1CC	CC	Toxorhamphus poliopterus	1	2015	1200m, WT, PNG	2017-08-08	Successful	6259	59	Good	7.53952	145.456
Tp_1LI	LI	Toxorhamphus poliopterus	1	2015	1200m, WT, PNG	2017-08-08	Successful	4717	219	Good	2.47437	145.456
Tp_1C	C	Toxorhamphus poliopterus	1	2015	1200m, WT, PNG	2017-08-08	Successful	3883	321	Good	16.405	145.456
Tp_2S	S	Toxorhamphus poliopterus	2	2015	1700m, WT, PNG	2017-08-08	Unsuccessful					145.449
Tp_2SIB	SIB	Toxorhamphus poliopterus	2	2015	1700m, WT, PNG	2017-08-08	Unsuccessful					145.449
Tp_2SIM	SIM	Toxorhamphus poliopterus	2	2015	1700m, WT, PNG	2017-08-08	Unsuccessful					145.449
Tp_2CC	CC	Toxorhamphus poliopterus	2	2015	1700m, WT, PNG	2017-08-08	Unsuccessful					145.449
Tp_2LI	LI	Toxorhamphus poliopterus	2	2015	1700m, WT, PNG	2017-08-08	Unsuccessful					145.449
Tp_2C	C	Toxorhamphus poliopterus	2	2015	1700m, WT, PNG	2017-08-08	Unsuccessful					145.449
Tp_3S	S	Toxorhamphus poliopterus	3	2015	1700m, WT, PNG	2017-08-08	Unsuccessful					145.447
Tp_3SIB	SIB	Toxorhamphus poliopterus	3	2015	1700m, WT, PNG	2017-08-08	Unsuccessful					145.447
Tp_3SIM	SIM	Toxorhamphus poliopterus	3	2015	1700m, WT, PNG	2017-08-08	Unsuccessful					145.447
Tp_3CC	CC	Toxorhamphus poliopterus	3	2015	1700m, WT, PNG	2017-08-08	Unsuccessful					145.447
Tp_3LI	LI	Toxorhamphus poliopterus	3	2015	1700m, WT, PNG	2017-08-08	Unsuccessful					145.447
Tp_3C	C	Toxorhamphus poliopterus	3	2015	1700m, WT, PNG	2017-08-08	Unsuccessful					145.447
Tp_4S	S	Toxorhamphus poliopterus	4	2015	1200m, WT, PNG	16/12/17	Successful	4907	149	Good	1.9304	145.479
Tp_4SIB	SIB	Toxorhamphus poliopterus	4	2015	1200m, WT, PNG	16/12/17	Successful	72770	297	Good	1.17634	145.479
Tp_4SIM	SIM	Toxorhamphus poliopterus	4	2015	1200m, WT, PNG	16/12/17	Successful	73081	506	Good	3.9714	145.479
Tp_4CC	CC	Toxorhamphus poliopterus	4	2015	1200m, WT, PNG	16/12/17	Successful	75510	322	Good	3.59999	145.479
Tp_4LI	LI	Toxorhamphus poliopterus	4	2015	1200m, WT, PNG	16/12/17	Successful	69173	227	Good	3.52026	145.479
Tp_4C	C	Toxorhamphus poliopterus	4	2015	1200m, WT, PNG	16/12/17	Successful	781	157	Not good	N/A	145.479
Tp_5S	S	Toxorhamphus poliopterus	5	2015	1700m, WT, PNG	16/12/17	Successful	9615	225	Good	15.2651	145.439
Tp_5SIB	SIB	Toxorhamphus poliopterus	5	2015	1700m, WT, PNG	16/12/17	Successful	10878	210	Good	3.22296	145.439
Tp_5SIM	SIM	Toxorhamphus poliopterus	5	2015	1700m, WT, PNG	16/12/17	Successful	21223	207	Good	4.84721	145.439
Tp_5CC	CC	Toxorhamphus poliopterus	5	2015	1700m, WT, PNG	16/12/17	Successful	2324	150	Not good	N/A	145.439
Tp_5LI	LI	Toxorhamphus poliopterus	5	2015	1700m, WT, PNG	16/12/17	Successful	5898	143	Good	12.6384	145.439
Tp_5C	C	Toxorhamphus poliopterus	5	2015	1700m, WT, PNG	16/12/17	Successful	582	152	Not good	N/A	145.439
Tp_6S	S	Toxorhamphus poliopterus	6	2015	1200m, WT, PNG	16/12/17	Successful	12213	323	Good	7.59893	145.443
Tp_6SIB	SIB	Toxorhamphus poliopterus	6	2015	1200m, WT, PNG	16/12/17	Successful	6957	44	Good	1.07346	145.443
Tp_6SIM	SIM	Toxorhamphus poliopterus	6	2015	1200m, WT, PNG	16/12/17	Successful	5608	63	Good	1.42935	145.443
Tp_6CC	CC	Toxorhamphus poliopterus	6	2015	1200m, WT, PNG	16/12/17	Successful	13073	150	Good	2.71242	145.443
Tp_6LI	LI	Toxorhamphus poliopterus	6	2015	1200m, WT, PNG	16/12/17	Successful	4062	125	Good	2.85563	145.443
Tp_6C	C	Toxorhamphus poliopterus	6	2015	1200m, WT, PNG	16/12/17	Successful	210	49	Not good	N/A	145.443

## Sheet: Table S3_Full OTU Table 
OTUs	Domain	Phylum	Class	Order	Family	Genus	Cm_1C	Cm_1CC	Cm_1LI	Cm_1S	Cm_1SIB	Cm_1SIM	Cm_2C	Cm_2CC	Cm_2LI	Cm_2R	Cm_2S	Cm_2SIB	Cm_2SIM	Cm_3R	Cr_1C	Cr_1CC	Cr_1LI	Cr_1S	Cr_1SIM	Cr_2C	Cr_2CC	Cr_2LI	Cr_2S	Cr_2SIB	Cr_2SIM	Cr_3C	Cr_3CC	Cr_3LI	Cr_3S	Cr_3SIM	Cr_4C	Cr_4CC	Cr_4LI	Cr_4S	Cr_4SIB	Cr_4SIM	Cr_5R	Ik_1C	Ik_1CC	Ik_1LI	Ik_1S	Ik_2R	Ik_SIB
Otu00001	Bacteria(100)	Firmicutes(100)	Bacilli(100)	Lactobacillales(100)	Carnobacteriaceae(62)	Carnobacteriaceae_unclassified(62)	4022	10239	2298	8120	8301	30524	852	215	18263	20	12	357	3539	183	24958	55080	56656	47363	39933	47006	42229	42123	47856	33067	54126	11314	34064	4890	3493	7686	35189	52676	25939	19672	7066	57366	25448	3145	1583	245	24464	25	10124
Otu00002	Bacteria(100)	Proteobacteria(100)	Gammaproteobacteria(100)	Enterobacteriales(100)	Enterobacteriaceae(100)	Enterobacteriaceae_unclassified(100)	25	492	16	8	2	105	19	22	4169	1464	1	45	8865	16	296	8	15	28	7	1	0	8	3	5	0	1	6	0	1	0	66081	48878	46226	10154	46105	78229	0	864	1040	0	1535	0	901
Otu00003	Bacteria(100)	Proteobacteria(100)	Gammaproteobacteria(86)	Gammaproteobacteria_unclassified(86)	Gammaproteobacteria_unclassified(86)	Gammaproteobacteria_unclassified(86)	32	1888	186	3	73	2293	5	12	1135	0	1	13	260	34121	176	34	61	145	28	2	124	51	56	27	82	5	44	0	2	0	199	774	232	26	0	467	4	28	11	0	67	1	13
Otu00004	Bacteria(100)	Firmicutes(100)	Bacilli(100)	Lactobacillales(100)	Lactobacillaceae(100)	Lactobacillus(100)	24	119	20	1	6	10	9	3	0	0	5	8	0	103112	90	0	3	3	0	4	1	0	0	0	3	0	0	1	2	0	25	0	2	6	0	0	0	105	14	0	498	0	36
Otu00005	Bacteria(100)	Firmicutes(100)	Bacilli(100)	Lactobacillales(100)	Enterococcaceae(100)	Enterococcus(100)	36	2147	61	171	44	1229	119	99214	4070	21	5958	13105	26017	31	0	2	2	2	5	29	13	46	6	15	8	0	1	2	0	0	37	95	35	1	1	29	133	20875	11015	1321	5070	1442	9089
Otu00006	Bacteria(100)	Proteobacteria(100)	Gammaproteobacteria(100)	Enterobacteriales(100)	Enterobacteriaceae(100)	Enterobacteriaceae_unclassified(100)	20	181	32	46	4	45	23	901	10	5645	3	12	206	1491	135	8	1	16	0	15	1	0	1	0	4	0	94	0	0	0	253	1055	481	120	100	971	101	1445	112	11	1401	408	1792
Otu00009	Bacteria(100)	Bacteria_unclassified(100)	Bacteria_unclassified(100)	Bacteria_unclassified(100)	Bacteria_unclassified(100)	Bacteria_unclassified(100)	0	0	0	0	0	0	0	0	0	0	0	0	0	0	0	0	0	0	0	0	0	0	0	0	0	0	0	0	0	0	0	0	0	0	0	0	0	9	0	6	0	5	0
Otu00008	Bacteria(100)	Tenericutes(100)	Mollicutes(100)	Mycoplasmatales(100)	Mycoplasmataceae(100)	Mycoplasmataceae_unclassified(100)	0	10	1	0	0	0	0	0	0	0	0	0	0	0	15	0	1	0	0	0	0	0	0	0	0	0	0	0	0	0	2	1	0	0	0	0	0	6	0	2	0	1	0
Otu00007	Bacteria(100)	Actinobacteria(100)	Actinobacteria(100)	Actinomycetales(100)	Micrococcaceae(100)	Rothia(100)	0	6	1	1	0	0	6	0	2	2	2	3	0	36827	76	0	0	0	1	0	0	0	0	0	0	0	0	0	0	0	0	0	1	1	0	1	1	19	0	0	0	1	15
Otu00010	Bacteria(100)	Proteobacteria(100)	Epsilonproteobacteria(100)	Campylobacterales(100)	Helicobacteraceae(100)	Helicobacter(100)	0	0	0	0	0	0	0	0	0	0	0	0	0	0	0	0	1	1	0	0	0	0	2	1	2	0	0	0	0	0	0	0	0	1	0	0	0	0	0	0	0	0	0
Otu00011	Bacteria(100)	Actinobacteria(100)	Actinobacteria(100)	Solirubrobacterales(100)	Conexibacteraceae(56)	Conexibacter(56)	0	289	39	2	6	629	0	13	0	0	0	0	0	3	2	69	29	4	15	38	99	140	25	10	66	0	0	0	0	0	8	14	1	0	0	3	1	976	4313	425	4660	3909	26390
Otu00013	Bacteria(100)	Firmicutes(100)	Bacilli(100)	Lactobacillales(100)	Lactobacillaceae(100)	Lactobacillus(100)	0	0	0	0	0	0	0	0	0	0	0	0	0	0	0	0	0	0	0	0	0	1	0	2	0	0	0	0	0	0	0	0	0	0	0	0	3	6355	46837	4248	1933	0	3909
Otu00014	Bacteria(100)	Firmicutes(100)	Bacilli(100)	Bacillales(100)	Staphylococcaceae(100)	Staphylococcus(100)	36	302	58	0	44	122	71	213	4592	11	2	31	307	136	525	2	17	1	8	2	4	2	1	3	3	9	405	3	1	2	4	0	0	0	1	0	3	455	202	16	197	1889	152
Otu00015	Bacteria(100)	Proteobacteria(100)	Gammaproteobacteria(100)	Pseudomonadales(100)	Pseudomonadaceae(100)	Pseudomonas(100)	7	51	4	0	0	0	3	0	371	526	1	6	0	10	3	1	7	6	0	4	0	0	1	3	1	0	197	0	0	0	0	0	0	0	0	3	0	94	4	0	393	0	35
Otu00016	Bacteria(100)	Firmicutes(100)	Bacilli(100)	Lactobacillales(100)	Leuconostocaceae(100)	Leuconostoc(100)	27	5263	185	171	84	8628	2	134	722	0	7	20	0	91	0	0	0	0	0	0	0	0	0	0	0	0	0	0	0	0	106	15	1	4	0	26	0	5218	1037	6	5502	0	6262
Otu00017	Bacteria(100)	Firmicutes(100)	Bacilli(100)	Lactobacillales(100)	Lactobacillales_unclassified(100)	Lactobacillales_unclassified(100)	5	58	21	0	0	79	0	5	0	0	0	0	0	131	6	0	0	0	2	0	0	0	0	0	0	0	0	0	0	0	0	0	0	0	0	0	0	2	0	0	19	0	0
Otu00019	Bacteria(100)	Actinobacteria(100)	Actinobacteria(100)	Actinomycetales(100)	Actinomycetales_unclassified(96)	Actinomycetales_unclassified(96)	11	83	5	6	0	146	0	20	0	13	1	0	0	13	0	41	15	11	11	19	48	41	14	0	43	1	1	0	0	0	17	13	3	2	0	29	10	1516	3695	198	3374	1200	15747
Otu00018	Bacteria(100)	Actinobacteria(100)	Actinobacteria(100)	Actinomycetales(100)	Mycobacteriaceae(100)	Mycobacterium(100)	1	149	13	17	0	243	4	236	111	0	7	7	89	23	0	118	50	15	7	23	102	285	61	17	137	2	0	0	0	0	13	48	1	2	0	22	6	4258	7433	608	3283	2	15046
Otu00012	Bacteria(100)	Firmicutes(100)	Bacilli(100)	Lactobacillales(100)	Streptococcaceae(100)	Lactococcus(100)	60	4022	238	81	72	3438	5	7	0	183	0	0	0	193	74	12	11	11	7	92	70	170	3	14	14	0	46	0	0	0	0	0	0	1	0	0	236	520	29	0	921	0	605
Otu00020	Bacteria(100)	Proteobacteria(100)	Alphaproteobacteria(100)	Rhizobiales(100)	Bartonellaceae(100)	Bartonella(100)	3	35	161	0	0	11	0	0	0	0	0	0	0	0	1	0	0	0	19	0	0	1	0	0	0	15	578	0	0	1	0	0	0	0	0	0	0	5	0	0	13	7	200
Otu00022	Bacteria(100)	Firmicutes(100)	Bacilli(100)	Lactobacillales(100)	Streptococcaceae(100)	Lactococcus(100)	9	41	24	15	3	117	35	9937	1637	0	761	2421	18472	101	0	0	0	0	0	0	0	0	0	0	0	0	0	1	0	0	0	0	0	0	0	0	0	0	0	0	0	0	0
Otu00023	Bacteria(100)	Bacteria_unclassified(100)	Bacteria_unclassified(100)	Bacteria_unclassified(100)	Bacteria_unclassified(100)	Bacteria_unclassified(100)	0	0	0	0	0	0	0	0	0	0	0	0	0	0	0	0	0	0	0	0	0	0	0	0	0	0	2	0	0	0	0	0	0	0	0	0	0	4	0	5	0	27	0
Otu00024	Bacteria(100)	Proteobacteria(100)	Gammaproteobacteria(100)	Pseudomonadales(100)	Pseudomonadaceae(100)	Pseudomonas(100)	0	0	0	0	0	0	0	0	0	0	0	0	0	0	40	0	6	7	2	2	13	2	6	2	6	2	266	1	0	1	0	0	0	1	0	0	0	439	3	0	216	362	149
Otu00025	Bacteria(100)	Firmicutes(100)	Bacilli(100)	Lactobacillales(100)	Streptococcaceae(100)	Streptococcus(100)	0	1	0	0	0	2	0	0	0	0	1	2	0	31230	24	0	0	0	0	0	0	0	0	0	0	0	0	0	0	0	4	1	0	4	0	0	0	128	14	0	249	1	251
Otu00026	Bacteria(100)	Firmicutes(100)	Clostridia(100)	Clostridiales(100)	Clostridiaceae_1(100)	Clostridium_sensu_stricto(100)	8	67	17	0	0	40	1	1	494	1	0	0	278	0	0	0	0	0	0	0	0	0	0	0	1	0	0	0	0	0	4261	4884	2989	160	684	1984	0	2816	154	2	6608	0	3001
Otu00027	Bacteria(100)	Actinobacteria(100)	Actinobacteria(100)	Actinomycetales(100)	Mycobacteriaceae(100)	Mycobacterium(100)	2	209	9	9	4	171	2	24	0	0	3	21	3	9	24	42	18	0	1	26	101	220	64	5	48	0	0	0	0	0	8	0	0	0	0	0	8	426	1851	79	3950	0	14205
Otu00029	Bacteria(100)	Tenericutes(100)	Mollicutes(100)	Mycoplasmatales(100)	Mycoplasmataceae(100)	Ureaplasma(100)	2	67	6	23	0	12	0	0	173	0	0	0	0	0	0	0	0	1	0	5	38	18	0	0	7	0	0	0	0	0	360	1038	258	6	1	344	986	0	0	0	19	0	1
Otu00021	Bacteria(100)	Tenericutes(100)	Mollicutes(100)	Mycoplasmatales(100)	Mycoplasmataceae(100)	Mycoplasma(100)	0	0	0	0	0	1	0	0	0	0	0	0	0	0	18	0	0	0	0	0	0	0	0	0	0	0	0	0	0	0	0	0	0	0	0	0	0	0	0	0	0	0	0
Otu00028	Bacteria(100)	Actinobacteria(100)	Actinobacteria(100)	Actinomycetales(100)	Pseudonocardiaceae(100)	Pseudonocardia(98)	6	208	52	21	16	506	30	121	417	0	31	84	155	4	31	171	19	62	61	15	15	35	43	0	3	0	1	0	0	0	2	5	0	0	0	3	100	1237	5726	473	1101	166	569
Otu00030	Bacteria(100)	Firmicutes(100)	Clostridia(100)	Clostridiales(100)	Clostridiaceae_1(100)	Clostridium_sensu_stricto(100)	37	191	62	1	13	6	10	27	2611	0	0	1	80	0	115	1	3	0	0	0	2	1	0	2	4	3	0	9	0	0	390	18	10	8	43	75	137	123	0	0	60	0	152
Otu00031	Bacteria(100)	Proteobacteria(100)	Gammaproteobacteria(100)	Enterobacteriales(100)	Enterobacteriaceae(100)	Enterobacteriaceae_unclassified(96)	0	32	0	0	0	0	0	1	0	0	0	0	0	0	0	0	0	2	0	12	0	3	0	19	0	0	0	1	0	0	6	7	33	2	0	4	317	648	2049	120	6438	0	361
Otu00034	Bacteria(100)	Firmicutes(100)	Clostridia(100)	Clostridiales(100)	Peptostreptococcaceae(100)	Peptostreptococcaceae_unclassified(57)	3	132	16	0	0	21	2	0	0	0	0	0	0	12	41	3	10	0	5	0	0	0	1	2	1	0	0	5	0	5	1	0	0	0	0	1	0	0	0	0	1	0	1
Otu00033	Bacteria(100)	Proteobacteria(100)	Gammaproteobacteria(100)	Enterobacteriales(100)	Enterobacteriaceae(100)	Pantoea(99)	13	13	0	0	4	0	9	18	0	19282	13	0	0	1	44	0	0	0	0	0	0	0	0	3	0	0	0	0	0	0	2	0	0	0	1	1	17	107	95	0	66	0	0
Otu00035	Bacteria(100)	Proteobacteria(100)	Alphaproteobacteria(100)	Alphaproteobacteria_unclassified(100)	Alphaproteobacteria_unclassified(100)	Alphaproteobacteria_unclassified(100)	0	0	1	0	0	0	0	0	601	0	0	0	0	0	57	0	0	0	0	0	0	0	0	1	0	0	4	0	0	0	0	0	0	0	0	0	0	0	0	0	1	0	0
Otu00036	Bacteria(100)	Proteobacteria(100)	Gammaproteobacteria(100)	Pseudomonadales(100)	Moraxellaceae(100)	Acinetobacter(100)	61	587	129	12	8	232	42	3	859	69	13	2	114	22	163	1	14	9	0	2	0	1	0	0	0	0	219	0	0	0	3	0	0	0	0	0	0	185	0	0	119	1	0
Otu00037	Bacteria(100)	Bacteroidetes(100)	Bacteroidetes_unclassified(100)	Bacteroidetes_unclassified(100)	Bacteroidetes_unclassified(100)	Bacteroidetes_unclassified(100)	0	0	0	0	0	0	0	0	0	0	0	0	0	0	102	0	16	28	25	1	1	0	4	11	2	12	470	4	4	2	0	0	0	0	0	0	0	1	0	1	0	0	0
Otu00032	Bacteria(100)	Proteobacteria(100)	Gammaproteobacteria(100)	Pseudomonadales(100)	Moraxellaceae(100)	Acinetobacter(100)	1	56	35	0	0	16	14	0	650	0	1	0	0	18	0	3	18	0	0	2	0	0	0	0	0	0	124	3	0	2	0	0	0	0	0	0	0	131	0	2	52	0	4
Otu00038	Bacteria(100)	Chlamydiae(100)	Chlamydiae(100)	Chlamydiales(100)	Chlamydiales_unclassified(100)	Chlamydiales_unclassified(100)	39	496	36	2	5	194	59	45	1561	1	0	4	15	12242	0	0	0	2	1	0	0	0	0	0	0	0	0	0	0	0	0	0	0	0	0	0	5	0	0	0	0	0	0
Otu00039	Bacteria(100)	Bacteroidetes(100)	Flavobacteria(100)	Flavobacteriales(100)	Flavobacteriaceae(100)	Flavobacterium(100)	0	11	4	0	0	0	0	26	1321	0	0	0	61	0	186	4	7	20	0	4	6	7	1	26	20	11	183	5	1	4	13	6	0	0	0	3	0	59	103	0	176	564	105
Otu00041	Bacteria(100)	Proteobacteria(100)	Alphaproteobacteria(100)	Rhizobiales(100)	Rhizobiales_unclassified(97)	Rhizobiales_unclassified(97)	1	25	2	0	0	6	7	11	0	0	0	0	0	0	66	43	17	12	5	67	139	243	211	48	154	0	0	0	0	0	0	0	0	2	0	0	218	579	3616	55	1560	1684	999
Otu00042	Bacteria(100)	Proteobacteria(100)	Alphaproteobacteria(100)	Rhizobiales(100)	Bradyrhizobiaceae(100)	Bradyrhizobium(95)	2	35	11	2	2	157	0	9	1	8	0	0	41	28	4	67	12	33	29	39	58	132	107	9	169	0	108	0	0	0	0	2	0	1	1	1	94	633	1802	193	2104	0	2776
Otu00043	Bacteria(100)	Proteobacteria(100)	Alphaproteobacteria(100)	Rhizobiales(100)	Rhizobiales_unclassified(100)	Rhizobiales_unclassified(100)	0	12	5	0	0	0	1	0	0	0	0	0	0	7	0	0	0	0	0	0	0	2	34	0	2	0	0	0	0	0	0	0	0	0	0	0	145	1868	3355	76	496	11051	150
Otu00040	Bacteria(100)	Firmicutes(100)	Bacilli(100)	Lactobacillales(100)	Leuconostocaceae(100)	Leuconostoc(100)	0	0	0	0	0	0	0	18	66	0	0	0	0	3084	86	4	1	5	3	0	0	0	0	0	0	0	0	0	0	0	12	11	0	4	0	19	0	3065	814	101	3975	0	5041
Otu00044	Bacteria(100)	Actinobacteria(100)	Actinobacteria(100)	Actinomycetales(100)	Actinomycetales_unclassified(71)	Actinomycetales_unclassified(71)	0	12	12	0	0	0	0	21	0	0	0	0	19	0	0	7	3	8	5	19	27	63	3	6	11	0	0	0	0	0	9	6	14	0	0	20	0	789	4294	322	1006	1267	3322
Otu00045	Bacteria(100)	Actinobacteria(100)	Actinobacteria(100)	Actinomycetales(100)	Actinomycetales_unclassified(100)	Actinomycetales_unclassified(100)	0	0	0	0	0	0	0	0	0	0	0	0	0	0	0	0	1	0	0	0	0	0	0	0	0	0	0	0	0	0	0	0	0	0	0	0	0	1	0	1	0	0	1
Otu00046	Bacteria(100)	Proteobacteria(100)	Gammaproteobacteria(95)	Gammaproteobacteria_unclassified(95)	Gammaproteobacteria_unclassified(95)	Gammaproteobacteria_unclassified(95)	0	0	0	0	0	0	0	0	0	0	1	0	0	339	0	23	28	8	52	0	1	0	0	2	0	1	0	0	0	0	0	0	0	0	0	0	0	414	5	0	1085	0	1224
Otu00047	Bacteria(100)	Actinobacteria(100)	Actinobacteria(100)	Actinomycetales(100)	Promicromonosporaceae(100)	Promicromonosporaceae_unclassified(100)	0	0	0	16	0	0	0	0	0	0	0	0	0	0	0	4	0	0	0	0	1	0	0	0	0	0	0	0	0	0	0	0	0	0	0	3	0	2366	6330	991	754	3856	487
Otu00048	Bacteria(100)	Proteobacteria(100)	Betaproteobacteria(100)	Burkholderiales(100)	Comamonadaceae(83)	Comamonadaceae_unclassified(83)	0	20	3	0	0	0	0	0	582	0	0	0	0	7	340	5	2	10	6	7	0	4	0	2	13	15	89	11	1	3	5	0	0	0	0	0	84	56	46	0	220	0	0
Otu00049	Bacteria(100)	Actinobacteria(100)	Actinobacteria(100)	Actinomycetales(100)	Microbacteriaceae(100)	Microbacteriaceae_unclassified(94)	3	92	16	0	4	63	1	22	70	0	2	0	0	8	8	62	22	11	2	9	17	49	2	0	25	0	18	0	1	0	0	0	7	2	4	9	63	428	1554	410	285	753	1391
Otu00050	Bacteria(100)	Firmicutes(100)	Clostridia(100)	Clostridiales(100)	Lachnospiraceae(100)	Lachnospiraceae_unclassified(100)	0	0	1	0	0	0	0	0	0	0	0	0	0	0	0	1	0	3	8	0	0	0	0	0	0	0	0	0	0	0	0	0	0	0	0	0	0	0	0	0	0	9384	0
Otu00051	Bacteria(100)	Firmicutes(100)	Clostridia(100)	Clostridiales(100)	Clostridiaceae_1(100)	Clostridium_sensu_stricto(95)	1	12	0	0	0	0	0	0	0	0	0	0	0	3	0	0	0	0	0	0	0	0	0	0	0	0	0	0	0	0	1	0	0	0	0	0	0	0	0	0	1	0	2
Otu00052	Bacteria(100)	Actinobacteria(100)	Actinobacteria(100)	Actinomycetales(100)	Actinomycetales_unclassified(96)	Actinomycetales_unclassified(96)	1	278	7	3	12	785	0	0	0	0	0	0	0	0	0	2	1	0	0	0	0	0	4	0	0	0	0	0	0	0	0	0	0	0	0	0	0	2391	2224	449	1095	0	5239
Otu00053	Bacteria(100)	Firmicutes(100)	Bacilli(100)	Lactobacillales(100)	Lactobacillaceae(100)	Lactobacillus(100)	0	0	0	0	0	0	0	0	0	0	0	0	0	0	201	1	0	1	0	7	2	0	7	17	3	0	2	1	2	4	0	0	0	0	0	0	0	0	0	1	2	0	1
Otu00054	Bacteria(100)	Proteobacteria(100)	Gammaproteobacteria(100)	Enterobacteriales(100)	Enterobacteriaceae(100)	Enterobacteriaceae_unclassified(100)	0	0	0	0	0	0	0	0	1	0	0	0	0	0	0	0	0	0	0	435	0	3	0	0	0	0	0	0	0	0	548	1584	993	79	79	1184	0	160	389	0	64	0	0
Otu00055	Bacteria(100)	Bacteria_unclassified(100)	Bacteria_unclassified(100)	Bacteria_unclassified(100)	Bacteria_unclassified(100)	Bacteria_unclassified(100)	0	0	0	0	0	0	0	1	0	0	0	0	0	0	0	0	0	0	0	0	0	0	0	0	0	0	0	0	0	0	0	0	0	0	0	0	0	0	0	0	0	0	0
Otu00056	Bacteria(100)	Firmicutes(100)	Bacilli(100)	Lactobacillales(100)	Carnobacteriaceae(100)	Carnobacterium(100)	0	0	0	0	0	0	0	0	0	0	0	0	0	0	0	0	0	0	0	0	0	3	2	1	0	0	0	0	0	0	4	26	9	1	0	8	3	222	10028	127	149	0	90
Otu00057	Bacteria(100)	Actinobacteria(100)	Actinobacteria(100)	Solirubrobacterales(100)	Conexibacteraceae(100)	Conexibacter(100)	1	85	0	0	0	17	0	2	0	0	0	0	0	0	0	50	18	12	0	23	82	112	17	1	51	0	0	0	0	0	0	0	0	0	0	13	107	320	1356	40	850	2839	2151
Otu00058	Bacteria(100)	Actinobacteria(100)	Actinobacteria(100)	Actinomycetales(100)	Actinomycetales_unclassified(66)	Actinomycetales_unclassified(66)	0	0	0	0	0	12	0	0	2	0	0	0	0	0	5	0	4	11	0	29	51	104	1	15	20	0	0	0	0	0	0	0	0	0	0	0	69	2009	1203	459	101	3374	747
Otu00059	Bacteria(100)	Planctomycetes(100)	Planctomycetacia(100)	Planctomycetales(100)	Planctomycetaceae(100)	Singulisphaera(100)	0	0	0	7	10	0	0	0	0	0	0	0	0	11	0	0	0	0	2	32	9	7	12	0	5	0	0	0	0	0	0	0	0	0	0	0	0	1657	2568	62	2924	0	247
Otu00060	Bacteria(100)	Actinobacteria(100)	Actinobacteria(100)	Actinomycetales(100)	Microbacteriaceae(100)	Microbacteriaceae_unclassified(100)	0	142	3	1	0	0	0	0	0	0	0	0	0	0	0	19	5	0	7	24	34	71	2	2	47	0	0	0	0	0	3	6	0	1	0	2	146	1139	1186	285	582	1300	2955
Otu00061	Bacteria(100)	Actinobacteria(99)	Actinobacteria(99)	Solirubrobacterales(89)	Solirubrobacterales_unclassified(89)	Solirubrobacterales_unclassified(89)	0	201	44	0	13	264	0	39	0	0	1	0	148	2	0	34	13	4	4	15	30	42	4	0	23	0	0	0	0	0	0	18	0	2	0	26	24	541	1658	46	511	582	2513
Otu00063	Bacteria(100)	Firmicutes(100)	Clostridia(100)	Clostridiales(100)	Ruminococcaceae(100)	Ruminococcaceae_unclassified(99)	0	115	5	1	1	70	0	0	0	0	0	0	0	3	0	4	0	0	0	3	0	13	0	0	4	0	0	0	0	0	0	0	0	0	0	0	0	0	0	0	0	10702	0
Otu00065	Bacteria(100)	Actinobacteria(100)	Actinobacteria(100)	Actinomycetales(100)	Microbacteriaceae(100)	Microbacteriaceae_unclassified(100)	0	5	3	0	0	23	1	0	0	0	0	0	0	0	0	22	12	10	0	2	0	1	2	1	1	0	0	0	0	0	0	16	2	0	0	1	31	482	817	2	222	2908	121
Otu00066	Bacteria(100)	Proteobacteria(100)	Betaproteobacteria(100)	Burkholderiales(100)	Comamonadaceae(100)	Polaromonas(97)	2	11	0	0	2	0	0	0	0	0	0	0	0	0	206	13	13	4	3	1	5	7	3	7	10	19	611	1	0	0	0	0	0	0	0	0	0	8	1	1	8	0	10
Otu00067	Bacteria(100)	Actinobacteria(100)	Actinobacteria(100)	Actinomycetales(100)	Microbacteriaceae(100)	Microbacteriaceae_unclassified(100)	0	17	3	0	0	28	0	15	0	0	0	0	51	0	0	75	37	7	2	22	34	71	25	20	51	0	0	0	0	0	7	24	0	4	0	44	39	389	1305	229	1025	815	1695
Otu00062	Bacteria(100)	Proteobacteria(100)	Alphaproteobacteria(100)	Rhizobiales(100)	Methylobacteriaceae(100)	Methylobacterium(100)	1	48	0	0	0	84	1	2	0	0	3	0	0	21	0	0	0	0	1	3	0	0	0	0	0	0	0	0	0	0	0	0	0	0	0	13	0	2394	2589	501	634	0	1644
Otu00068	Bacteria(100)	Firmicutes(100)	Firmicutes_unclassified(100)	Firmicutes_unclassified(100)	Firmicutes_unclassified(100)	Firmicutes_unclassified(100)	0	0	0	0	0	12	0	0	0	0	0	0	0	0	0	0	0	0	0	0	0	1	0	0	0	0	0	0	0	0	0	0	0	0	0	0	28	1100	4122	1414	421	1705	1284
Otu00069	Bacteria(100)	Proteobacteria(100)	Betaproteobacteria(74)	Burkholderiales(74)	Comamonadaceae(74)	Comamonadaceae_unclassified(74)	0	4	4	5	0	0	4	13	433	0	0	108	325	8	0	1	0	1	4	0	0	0	3	0	0	0	0	1	0	0	26	10	0	0	0	0	59	11	3	0	53	674	283
Otu00070	Bacteria(100)	Proteobacteria(100)	Alphaproteobacteria(100)	Rhodospirillales(100)	Acetobacteraceae(100)	Gluconobacter(100)	0	0	0	0	0	0	0	0	0	0	0	0	0	0	0	0	0	0	0	0	0	0	0	0	0	0	0	0	0	0	26	4	0	0	27	3	0	3274	166	46	3097	0	3375
Otu00071	Bacteria(100)	Proteobacteria(100)	Alphaproteobacteria(100)	Rhizobiales(100)	Rhizobiales_unclassified(84)	Rhizobiales_unclassified(84)	15	90	1	6	2	49	1	3	0	0	0	0	93	18	21	6	4	4	9	0	1	6	0	1	3	0	23	0	0	0	11	0	0	2	0	0	0	1409	1203	214	747	0	261
Otu00064	Bacteria(100)	Proteobacteria(100)	Alphaproteobacteria(100)	Rhizobiales(100)	Rhizobiaceae(100)	Rhizobium(100)	0	8	0	0	0	1	0	15	0	0	2	0	0	40	0	15	0	22	0	10	16	45	0	0	29	0	0	0	0	0	7	0	8	0	0	19	0	2896	1265	311	1264	0	1030
Otu00073	Bacteria(100)	Firmicutes(100)	Bacilli(100)	Lactobacillales(100)	Leuconostocaceae(100)	Weissella(100)	0	0	0	0	0	0	0	0	0	0	0	48	0	0	0	0	0	0	0	0	0	0	0	0	0	0	0	0	0	0	40	1	0	0	12	4	0	1826	348	8	3516	0	3606
Otu00072	Bacteria(100)	Actinobacteria(100)	Actinobacteria(100)	Actinomycetales(100)	Pseudonocardiaceae(100)	Pseudonocardia(100)	0	6	1	2	0	0	0	21	0	0	2	9	0	0	0	17	0	6	0	4	5	11	0	0	0	0	0	0	0	0	0	0	0	0	0	2	0	838	3530	552	626	0	401
Otu00074	Bacteria(100)	Proteobacteria(100)	Alphaproteobacteria(100)	Rhizobiales(100)	Bartonellaceae(94)	Bartonella(94)	11	3	2	0	0	74	0	0	0	0	0	0	0	0	0	0	0	0	0	0	0	0	0	0	0	1	1	0	0	0	2	0	0	0	0	0	0	0	0	0	5	1	0
Otu00075	Bacteria(100)	Actinobacteria(100)	Actinobacteria(100)	Actinomycetales(100)	Corynebacteriaceae(100)	Corynebacterium(100)	7	94	33	0	2	5	1	41	677	0	6	0	0	13	267	0	13	0	11	0	0	0	0	0	5	0	63	1	0	2	0	0	0	0	0	0	0	0	0	0	0	1	23
Otu00077	Bacteria(100)	Proteobacteria(100)	Epsilonproteobacteria(100)	Campylobacterales(100)	Campylobacteraceae(100)	Arcobacter(100)	0	0	0	0	0	0	0	0	0	0	0	0	0	0	297	7	3	6	9	1	4	0	0	8	6	13	94	2	2	2	0	0	0	0	0	0	0	0	0	1	0	0	0
Otu00078	Bacteria(100)	Actinobacteria(100)	Actinobacteria(100)	Actinomycetales(100)	Nocardiaceae(100)	Rhodococcus(100)	0	9	0	0	0	0	0	0	46	0	1	0	0	0	0	3	0	0	0	1	8	2	3	0	3	3	0	0	0	0	0	3	0	0	0	0	0	2592	709	154	654	0	2322
Otu00079	Bacteria(100)	Proteobacteria(100)	Alphaproteobacteria(100)	Rhizobiales(100)	Rhizobiales_unclassified(100)	Rhizobiales_unclassified(100)	9	16	4	0	0	0	0	0	259	0	0	0	0	0	9	0	0	0	0	0	0	1	0	0	1	0	0	0	0	0	0	0	0	0	0	0	0	1729	2853	129	285	2421	290
Otu00080	Bacteria(100)	Firmicutes(100)	Bacilli(100)	Lactobacillales(100)	Lactobacillaceae(100)	Lactobacillus(100)	0	0	0	5	0	0	0	891	863	0	1126	300	5246	0	0	0	0	0	0	0	0	0	0	0	0	0	0	0	0	0	0	0	0	0	0	0	0	0	0	0	0	0	0
Otu00082	Bacteria(100)	Firmicutes(100)	Clostridia(100)	Clostridiales(100)	Clostridiales_unclassified(93)	Clostridiales_unclassified(93)	0	33	0	3	2	79	0	0	0	0	0	0	0	0	0	0	0	0	0	0	0	0	0	0	0	0	0	0	0	0	0	0	0	0	0	0	0	0	0	0	0	0	0
Otu00081	Bacteria(100)	Proteobacteria(100)	Alphaproteobacteria(100)	Rhizobiales(100)	Rhizobiales_unclassified(97)	Rhizobiales_unclassified(97)	0	35	0	1	0	0	0	21	56	1	0	0	47	1	0	14	1	2	10	5	4	4	4	0	3	0	0	0	0	0	0	0	5	0	0	1	0	627	1074	111	260	0	728
Otu00083	Bacteria(100)	Firmicutes(100)	Clostridia(100)	Clostridiales(100)	Clostridiaceae_1(100)	Clostridiaceae_1_unclassified(100)	0	0	0	0	0	0	0	0	0	0	0	0	0	0	0	0	0	0	0	0	0	0	0	0	0	0	0	0	0	0	0	0	0	0	0	0	0	5205	1350	316	38	0	543
Otu00084	Bacteria(100)	Actinobacteria(100)	Actinobacteria(100)	Actinomycetales(100)	Intrasporangiaceae(100)	Janibacter(77)	2	43	3	0	0	96	4	39	54	0	1	3	230	1	74	28	22	18	2	0	10	9	6	0	6	0	0	0	0	0	0	33	8	3	0	7	0	240	1798	195	206	0	556
Otu00085	Bacteria(100)	Actinobacteria(100)	Actinobacteria(100)	Actinomycetales(100)	Corynebacteriaceae(100)	Corynebacterium(100)	1	158	6	0	0	0	1	36	199	0	3	0	0	69	45	1	4	2	0	0	0	0	3	0	0	1	54	0	1	0	0	0	0	0	0	0	0	17	0	0	10	0	5
Otu00087	Bacteria(100)	Actinobacteria(100)	Actinobacteria(100)	Actinomycetales(100)	Actinomycetales_unclassified(100)	Actinomycetales_unclassified(100)	0	0	0	0	0	0	0	0	0	0	0	0	0	0	0	0	0	0	0	32	7	48	0	0	1	0	0	0	0	0	0	0	0	0	0	0	1394	61	26	64	13	0	4
Otu00086	Bacteria(100)	Proteobacteria(100)	Alphaproteobacteria(100)	Rhizobiales(100)	Rhizobiales_unclassified(62)	Rhizobiales_unclassified(62)	0	2	23	0	0	0	3	0	33	0	0	1	129	2	1	0	0	0	0	0	0	0	12	0	0	0	0	0	0	0	0	0	0	0	0	0	19	577	752	14	460	2148	164
Otu00089	Bacteria(100)	Proteobacteria(100)	Alphaproteobacteria(100)	Rhizobiales(96)	Rhizobiales_unclassified(96)	Rhizobiales_unclassified(96)	1	0	5	0	0	0	0	0	0	0	0	0	0	0	0	0	0	0	0	0	0	0	0	0	0	0	0	0	0	0	0	0	0	0	0	0	0	541	269	68	175	3142	200
Otu00090	Bacteria(100)	Proteobacteria(100)	Betaproteobacteria(100)	Neisseriales(100)	Neisseriaceae(100)	Neisseriaceae_unclassified(100)	0	0	0	0	0	0	1	0	0	0	0	0	0	0	5	0	0	0	0	0	1	0	0	0	0	0	46	0	1	1	0	0	0	0	0	0	0	1	0	0	0	0	0
Otu00091	Bacteria(100)	Proteobacteria(100)	Deltaproteobacteria(100)	Desulfovibrionales(100)	Desulfovibrionaceae(100)	Desulfovibrio(100)	0	0	0	0	0	0	0	0	0	0	0	0	0	0	0	0	0	0	0	0	0	0	0	0	0	0	0	0	0	0	0	0	0	0	0	0	0	2971	2562	647	88	687	11
Otu00092	Bacteria(100)	Firmicutes(100)	Firmicutes_unclassified(100)	Firmicutes_unclassified(100)	Firmicutes_unclassified(100)	Firmicutes_unclassified(100)	0	0	0	0	0	0	0	0	0	0	0	0	0	0	0	0	0	0	0	0	0	0	0	0	1	0	0	0	0	0	0	0	0	0	0	0	0	2176	746	137	104	3642	13
Otu00093	Bacteria(100)	Proteobacteria(100)	Alphaproteobacteria(100)	Rhizobiales(100)	Rhizobiales_unclassified(100)	Rhizobiales_unclassified(100)	3	48	0	0	0	0	0	0	0	0	1	0	0	6	0	7	5	0	0	24	29	70	83	15	53	0	0	0	0	0	0	0	0	0	0	0	157	926	1647	30	657	0	462
Otu00094	Bacteria(100)	Firmicutes(100)	Erysipelotrichia(100)	Erysipelotrichales(100)	Erysipelotrichaceae(100)	Clostridium_XVIII(74)	2	42	0	107	0	83	0	0	0	0	0	0	0	0	0	5	0	0	0	41	39	65	9	0	34	0	0	0	0	0	0	0	0	0	0	0	0	0	0	0	0	652	0
Otu00095	Bacteria(100)	Firmicutes(100)	Clostridia(100)	Clostridiales(100)	Lachnospiraceae(100)	Lachnospiraceae_unclassified(100)	0	0	0	0	0	0	0	0	0	0	0	0	0	0	0	0	0	1	0	0	0	0	2	0	0	0	0	1	0	3	0	0	0	0	0	0	0	0	0	0	2	0	0
Otu00096	Bacteria(100)	Actinobacteria(100)	Actinobacteria(100)	Actinomycetales(100)	Actinomycetales_unclassified(100)	Actinomycetales_unclassified(100)	0	0	0	0	0	0	0	0	0	0	0	0	0	0	0	0	0	0	0	0	10	12	8	0	0	0	0	0	0	0	0	0	0	0	0	0	0	122	2734	404	288	777	297
Otu00097	Bacteria(100)	Bacteria_unclassified(100)	Bacteria_unclassified(100)	Bacteria_unclassified(100)	Bacteria_unclassified(100)	Bacteria_unclassified(100)	0	0	0	0	0	0	0	0	6773	0	0	0	0	0	0	0	0	0	0	0	0	0	0	0	0	0	0	0	0	0	0	0	0	0	0	0	0	0	0	0	0	0	0
Otu00098	Bacteria(100)	Actinobacteria(100)	Actinobacteria(100)	Coriobacteriales(100)	Coriobacteriaceae(100)	Coriobacteriaceae_unclassified(60)	2	52	1	0	0	109	0	0	0	0	0	0	0	0	42	78	45	28	60	55	154	267	10	8	97	0	0	0	0	0	0	0	0	0	0	0	0	0	0	0	1	4370	0
Otu00099	Bacteria(100)	Actinobacteria(100)	Actinobacteria(100)	Coriobacteriales(100)	Coriobacteriaceae(100)	Coriobacteriaceae_unclassified(100)	0	0	0	0	0	0	0	0	0	0	0	0	0	0	0	0	0	0	0	0	0	0	0	0	0	0	0	0	0	0	0	0	0	0	0	0	0	481	1151	124	562	66	2779
Otu00101	Bacteria(100)	Bacteria_unclassified(100)	Bacteria_unclassified(100)	Bacteria_unclassified(100)	Bacteria_unclassified(100)	Bacteria_unclassified(100)	0	0	0	0	0	0	0	0	0	0	0	0	0	0	0	0	0	0	0	0	0	0	0	0	0	0	0	0	0	0	0	0	0	0	0	0	0	386	2174	428	15	3377	40
Otu00100	Bacteria(100)	Firmicutes(100)	Bacilli(100)	Bacillales(100)	Bacillales_unclassified(100)	Bacillales_unclassified(100)	0	402	3	1	14	896	5	0	275	0	7	0	0	0	0	4	0	0	9	5	2	1	0	0	2	3	132	0	0	0	0	0	0	0	0	0	0	0	0	0	13	0	37
Otu00102	Bacteria(100)	Actinobacteria(100)	Actinobacteria(100)	Actinomycetales(100)	Brevibacteriaceae(100)	Brevibacterium(100)	0	3	0	0	0	0	8	0	0	0	0	0	2	16	0	0	1	0	0	0	0	0	0	0	0	0	0	0	0	0	0	0	0	0	0	0	0	0	0	0	0	652	0
Otu00104	Bacteria(100)	Proteobacteria(100)	Gammaproteobacteria(100)	Gammaproteobacteria_order_incertae_sedis(100)	Gammaproteobacteria_family_incertae_sedis(100)	Orbus(100)	0	10	5	0	0	0	1	0	0	0	0	0	0	0	0	0	0	0	0	0	0	0	0	0	0	0	0	0	0	0	0	0	0	0	0	0	0	1	0	0	0	0	0
Otu00088	Bacteria(100)	Actinobacteria(100)	Actinobacteria(100)	Actinomycetales(100)	Pseudonocardiaceae(100)	Pseudonocardiaceae_unclassified(99)	6	161	78	11	15	415	17	178	1018	0	18	37	371	7	0	13	5	7	1	0	3	4	7	0	3	0	0	0	0	0	0	0	0	0	0	0	0	157	63	14	52	0	8
Otu00103	Bacteria(100)	Actinobacteria(100)	Actinobacteria(100)	Actinomycetales(100)	Cellulomonadaceae(96)	Cellulomonas(96)	0	11	0	26	0	42	0	2	0	0	0	0	100	4	8	21	7	8	2	4	9	6	1	0	9	0	0	1	0	0	0	1	0	0	0	9	0	195	616	202	169	94	1009
Otu00105	Bacteria(100)	Actinobacteria(100)	Actinobacteria(100)	Actinomycetales(100)	Actinomycetales_unclassified(100)	Actinomycetales_unclassified(100)	0	0	3	0	0	0	0	3	0	0	0	0	0	5	0	7	0	2	1	0	2	0	6	0	5	0	0	0	0	0	0	1	5	0	0	4	0	83	1680	6	418	0	2572
Otu00107	Bacteria(100)	Proteobacteria(100)	Alphaproteobacteria(100)	Rhodospirillales(100)	Acetobacteraceae(100)	Acetobacteraceae_unclassified(100)	0	0	0	0	0	0	0	0	0	0	0	0	0	0	0	0	0	0	0	0	0	0	0	0	0	0	0	0	0	0	0	0	0	0	0	0	0	0	143	0	9	0	0
Otu00108	Bacteria(100)	Proteobacteria(100)	Alphaproteobacteria(100)	Rhodospirillales(100)	Acetobacteraceae(100)	Acetobacteraceae_unclassified(100)	0	10	0	0	0	0	0	0	0	0	0	0	0	0	0	0	0	0	0	0	0	0	0	0	0	0	0	0	0	0	0	0	0	0	0	0	0	1133	2480	34	761	0	225
Otu00106	Bacteria(100)	Actinobacteria(100)	Actinobacteria(100)	Actinomycetales(100)	Actinomycetales_unclassified(73)	Actinomycetales_unclassified(73)	0	23	5	0	0	0	3	2	16	0	0	9	510	4	0	16	2	0	8	0	0	0	0	0	2	0	0	0	0	0	1	0	0	0	0	0	0	351	61	54	332	392	964
Otu00109	Bacteria(100)	Firmicutes(100)	Clostridia(100)	Clostridiales(100)	Ruminococcaceae(100)	Ruminococcaceae_unclassified(100)	0	0	0	0	0	0	0	0	0	0	0	0	0	0	0	0	0	0	0	0	0	0	0	0	0	0	0	0	0	0	0	0	0	0	0	0	0	25	591	124	40	4859	219
Otu00110	Bacteria(100)	Actinobacteria(100)	Actinobacteria(100)	Actinomycetales(100)	Nocardiaceae(100)	Williamsia(100)	0	26	0	0	0	24	0	6	0	0	0	0	0	0	0	1	0	0	0	0	1	2	0	0	0	0	0	0	0	0	0	2	0	1	0	0	0	221	407	16	654	0	2657
Otu00111	Bacteria(100)	Firmicutes(100)	Clostridia(100)	Clostridiales(100)	Clostridiales_unclassified(70)	Clostridiales_unclassified(70)	2	4	0	4	2	2	0	0	0	0	0	0	0	0	1	3	1	0	0	0	3	14	5	0	12	0	0	0	0	0	0	0	6	0	0	0	525	558	950	14	90	2960	93
Otu00112	Bacteria(100)	Actinobacteria(100)	Actinobacteria(100)	Actinomycetales(100)	Segniliparaceae(100)	Segniliparus(100)	1	28	0	0	0	111	0	40	0	0	5	0	0	0	4	19	11	0	0	0	3	17	0	0	0	0	0	0	0	0	0	0	0	0	0	0	0	0	0	0	3022	0	1733
Otu00113	Bacteria(100)	Firmicutes(100)	Negativicutes(100)	Selenomonadales(100)	Selenomonadales_unclassified(100)	Selenomonadales_unclassified(100)	0	0	0	0	0	0	0	0	0	0	0	0	0	0	0	0	0	0	0	0	0	0	0	0	0	0	0	0	0	0	0	0	0	0	0	0	0	1074	3183	393	773	144	117
Otu00114	Bacteria(100)	Proteobacteria(100)	Alphaproteobacteria(100)	Rhizobiales(100)	Methylobacteriaceae(100)	Microvirga(94)	0	0	0	0	0	0	0	0	0	0	0	0	0	0	0	28	0	0	0	8	5	18	0	0	0	0	0	0	0	0	0	0	1	0	0	0	0	1904	692	170	0	0	0
Otu00115	Bacteria(100)	Proteobacteria(100)	Gammaproteobacteria(100)	Pseudomonadales(100)	Moraxellaceae(100)	Acinetobacter(100)	0	0	0	0	0	0	0	0	0	0	0	0	0	0	1	12	11	5	0	16	2	0	0	0	0	3	100	6	0	0	0	0	0	0	0	0	0	35	0	1	71	0	0
Otu00117	Bacteria(100)	Proteobacteria(100)	Gammaproteobacteria(100)	Gammaproteobacteria_unclassified(100)	Gammaproteobacteria_unclassified(100)	Gammaproteobacteria_unclassified(100)	0	0	0	0	0	0	0	0	0	0	0	0	0	0	0	0	0	0	0	0	0	0	0	0	0	0	0	0	0	0	0	0	0	0	0	0	0	116	4707	0	49	0	55
Otu00118	Bacteria(100)	Proteobacteria(100)	Alphaproteobacteria(100)	Rhizobiales(100)	Bradyrhizobiaceae(100)	Bradyrhizobiaceae_unclassified(68)	0	52	12	0	0	0	0	0	0	0	0	0	0	5	0	3	0	6	0	0	0	4	4	0	0	0	0	0	0	0	2	0	0	1	0	8	0	358	221	4	290	1186	923
Otu00119	Bacteria(100)	Bacteria_unclassified(100)	Bacteria_unclassified(100)	Bacteria_unclassified(100)	Bacteria_unclassified(100)	Bacteria_unclassified(100)	6	0	0	0	0	0	0	0	0	0	0	0	0	0	0	7	0	0	0	8	75	84	0	2	11	0	0	0	0	0	0	0	0	0	0	2	0	176	844	113	879	0	344
Otu00120	Bacteria(100)	Actinobacteria(100)	Actinobacteria(100)	Actinomycetales(100)	Actinomycetales_unclassified(60)	Actinomycetales_unclassified(60)	0	0	2	0	0	0	0	0	0	0	0	0	0	0	6	26	8	18	4	2	6	14	26	0	1	0	0	0	0	0	0	0	0	0	0	0	25	64	671	0	297	2130	81
Otu00116	Bacteria(100)	Proteobacteria(100)	Alphaproteobacteria(100)	Rhizobiales(100)	Rhizobiales_unclassified(82)	Rhizobiales_unclassified(82)	1	24	5	0	0	12	1	61	0	0	0	0	0	5	0	0	0	7	7	0	0	0	0	0	0	0	0	0	0	0	0	0	0	0	0	0	0	732	1197	232	73	0	30
Otu00121	Bacteria(100)	Proteobacteria(100)	Alphaproteobacteria(100)	Sphingomonadales(100)	Sphingomonadaceae(100)	Sphingomonas(100)	8	151	14	0	2	164	9	7	1	0	2	0	0	24	20	0	4	0	0	0	0	0	0	0	0	0	0	0	0	0	0	2	0	0	0	0	0	369	36	5	423	0	130
Otu00123	Bacteria(100)	Proteobacteria(100)	Alphaproteobacteria(100)	Rhodospirillales(100)	Acetobacteraceae(100)	Acetobacteraceae_unclassified(100)	4	21	24	0	3	0	0	0	0	0	0	0	0	0	0	4	0	0	0	0	2	3	3	0	21	0	0	0	0	0	0	0	0	0	0	0	0	249	220	0	71	2117	41
Otu00124	Bacteria(100)	Firmicutes(100)	Bacilli(100)	Bacilli_unclassified(100)	Bacilli_unclassified(100)	Bacilli_unclassified(100)	0	0	0	0	0	0	0	0	0	0	0	0	0	0	0	53	82	0	13	0	2	0	0	0	2	0	0	0	0	0	0	0	0	0	0	0	15	1333	2682	582	80	0	117
Otu00125	Bacteria(100)	Actinobacteria(100)	Actinobacteria(100)	Actinomycetales(100)	Streptomycetaceae(100)	Streptomycetaceae_unclassified(100)	6	62	7	0	0	16	0	4	174	0	0	0	0	9	176	40	8	13	11	0	22	36	17	4	73	0	0	0	0	0	13	11	0	0	0	16	0	295	301	0	137	0	222
Otu00126	Bacteria(100)	Actinobacteria(100)	Actinobacteria(100)	Actinomycetales(100)	Micromonosporaceae(100)	Micromonosporaceae_unclassified(98)	0	12	2	0	0	0	0	0	0	0	0	0	0	0	0	1	4	0	0	0	0	2	0	0	3	0	0	0	0	0	0	5	0	0	0	1	0	58	709	0	391	0	1670
Otu00127	Bacteria(100)	Proteobacteria(100)	Alphaproteobacteria(100)	Rhizobiales(100)	Rhizobiales_unclassified(100)	Rhizobiales_unclassified(100)	0	0	0	0	0	0	0	0	0	0	0	0	0	0	0	0	0	0	0	0	0	0	0	0	0	0	0	0	0	0	0	0	0	0	0	0	0	1358	1870	174	723	432	142
Otu00128	Bacteria(100)	Bacteria_unclassified(100)	Bacteria_unclassified(100)	Bacteria_unclassified(100)	Bacteria_unclassified(100)	Bacteria_unclassified(100)	3	33	0	0	0	8	0	0	0	0	0	0	0	4	0	5	0	0	0	0	7	13	0	0	0	0	0	0	0	1	0	0	0	0	0	0	29	798	784	102	651	431	422
Otu00129	Bacteria(100)	Proteobacteria(100)	Alphaproteobacteria(100)	Rhizobiales(100)	Methylobacteriaceae(100)	Methylobacterium(100)	1	0	0	0	0	0	0	0	125	0	0	0	0	0	103	0	0	0	0	0	0	0	0	0	0	0	0	0	0	0	0	0	0	0	0	0	0	854	817	344	200	204	212
Otu00132	Bacteria(100)	Actinobacteria(100)	Actinobacteria(100)	Actinomycetales(100)	Kineosporiaceae(98)	Kineosporiaceae_unclassified(84)	0	0	0	1	0	0	0	0	0	11	0	0	0	0	47	1	0	2	0	0	1	0	0	0	0	0	0	0	0	0	0	0	0	0	0	0	0	23	204	0	73	2862	130
Otu00133	Bacteria(100)	Actinobacteria(100)	Actinobacteria(100)	Actinomycetales(100)	Micrococcaceae(100)	Micrococcus(85)	3	79	10	0	0	0	18	5	764	0	18	70	0	5	72	0	6	0	0	0	0	1	0	0	1	0	1	0	0	0	0	0	0	0	0	0	0	0	0	2	18	0	0
Otu00130	Bacteria(100)	Actinobacteria(100)	Actinobacteria(100)	Actinomycetales(100)	Micrococcaceae(100)	Kocuria(100)	1	9	0	0	0	3	10	1978	126	0	41	153	1404	582	0	0	0	0	0	0	0	0	0	0	0	0	0	0	0	0	0	0	0	0	0	0	0	0	0	0	0	0	0
Otu00131	Bacteria(100)	Proteobacteria(100)	Proteobacteria_unclassified(100)	Proteobacteria_unclassified(100)	Proteobacteria_unclassified(100)	Proteobacteria_unclassified(100)	0	11	0	0	0	0	6	0	0	0	0	0	0	0	0	0	0	0	0	0	0	0	0	0	0	3	0	0	2	0	0	0	0	0	0	0	0	0	4217	0	0	0	0
Otu00134	Bacteria(100)	Proteobacteria(100)	Proteobacteria_unclassified(100)	Proteobacteria_unclassified(100)	Proteobacteria_unclassified(100)	Proteobacteria_unclassified(100)	0	0	0	0	0	0	0	0	0	0	0	0	0	0	0	0	0	0	0	0	0	0	0	0	0	0	0	0	0	0	0	0	0	0	0	0	0	461	1318	44	2	2604	0
Otu00135	Bacteria(100)	Firmicutes(100)	Bacilli(100)	Lactobacillales(100)	Carnobacteriaceae(94)	Trichococcus(94)	0	0	0	0	0	0	0	0	0	0	0	0	0	0	49	0	1	1	2	0	0	1	0	6	0	0	119	0	1	1	0	0	0	0	0	0	0	0	0	0	1	0	0
Otu00136	Bacteria(100)	Firmicutes(100)	Clostridia(100)	Clostridiales(100)	Clostridiales_unclassified(100)	Clostridiales_unclassified(100)	0	0	0	0	0	0	0	0	0	0	0	0	0	0	0	1	0	0	0	0	0	0	0	0	0	0	0	0	0	0	1	0	0	0	0	0	0	688	2	0	634	0	489
Otu00137	Bacteria(100)	Bacteria_unclassified(97)	Bacteria_unclassified(97)	Bacteria_unclassified(97)	Bacteria_unclassified(97)	Bacteria_unclassified(97)	0	93	24	0	0	83	5	0	0	0	0	0	127	12	0	1	0	0	0	0	0	0	0	0	0	0	0	0	0	0	0	0	0	0	0	0	0	1381	97	0	661	0	259
Otu00138	Bacteria(100)	Proteobacteria(100)	Betaproteobacteria(100)	Burkholderiales(100)	Oxalobacteraceae(100)	Undibacterium(100)	0	0	0	0	0	0	0	0	0	0	0	0	0	0	37	0	0	9	0	1	2	0	1	4	7	6	49	0	4	1	0	0	0	0	0	0	0	0	0	0	0	0	0
Otu00139	Bacteria(100)	Bacteria_unclassified(100)	Bacteria_unclassified(100)	Bacteria_unclassified(100)	Bacteria_unclassified(100)	Bacteria_unclassified(100)	0	0	0	0	0	0	0	0	0	0	0	0	0	0	0	0	2	0	0	8	8	26	5	0	3	0	0	0	0	0	0	0	0	0	0	0	0	267	1358	52	388	676	540
Otu00140	Bacteria(100)	Firmicutes(100)	Clostridia(100)	Clostridiales(100)	Lachnospiraceae(100)	Lachnospiraceae_unclassified(100)	0	0	0	0	0	0	0	0	0	0	0	0	0	0	0	0	0	0	0	0	6	3	0	3	1	0	0	0	0	0	0	0	0	0	0	0	0	173	297	103	16	389	174
Otu00141	Bacteria(100)	Proteobacteria(100)	Gammaproteobacteria(100)	Pseudomonadales(100)	Pseudomonadaceae(100)	Pseudomonas(98)	8	0	0	0	0	0	0	1	3	23	0	0	0	0	66	0	0	0	0	3	0	0	0	0	0	4	0	0	0	0	0	0	0	0	0	0	0	89	0	0	33	0	0
Otu00142	Bacteria(100)	Bacteria_unclassified(100)	Bacteria_unclassified(100)	Bacteria_unclassified(100)	Bacteria_unclassified(100)	Bacteria_unclassified(100)	0	0	4	0	0	0	0	0	0	0	0	0	0	0	0	0	0	0	0	0	0	0	0	0	0	0	0	0	0	0	0	0	0	0	0	0	0	45	0	0	3887	0	142
Otu00144	Bacteria(100)	Actinobacteria(100)	Actinobacteria(100)	Actinomycetales(100)	Geodermatophilaceae(89)	Geodermatophilaceae_unclassified(87)	0	0	0	0	0	0	0	0	0	0	0	0	0	0	0	0	0	0	0	0	0	0	0	0	1	0	0	0	0	0	0	0	0	0	0	0	0	38	399	24	132	446	1777
Otu00145	Bacteria(100)	Firmicutes(100)	Clostridia(100)	Clostridiales(100)	Clostridiales_unclassified(100)	Clostridiales_unclassified(100)	0	0	0	0	0	0	0	0	0	0	0	0	0	0	0	0	0	0	0	0	0	0	0	0	0	0	0	0	0	0	0	0	0	0	0	0	0	3391	116	141	21	0	294
Otu00146	Bacteria(100)	Actinobacteria(100)	Actinobacteria(100)	Actinomycetales(100)	Nocardiaceae(100)	Nocardiaceae_unclassified(100)	0	0	0	0	0	0	0	0	0	0	0	0	0	0	0	0	0	0	0	0	0	0	0	0	0	0	0	0	0	0	0	0	0	0	0	0	0	703	781	86	290	0	1781
Otu00143	Bacteria(100)	Proteobacteria(100)	Alphaproteobacteria(100)	Rhizobiales(100)	Methylobacteriaceae(100)	Methylobacterium(100)	0	0	0	0	0	0	0	6	0	0	0	0	0	4	0	4	0	2	0	0	0	0	0	0	0	0	0	0	0	0	0	0	0	0	0	0	0	978	1686	194	181	0	375
Otu00147	Bacteria(100)	Bacteroidetes(100)	Flavobacteria(100)	Flavobacteriales(100)	Flavobacteriaceae(100)	Flavobacterium(100)	0	0	0	0	0	0	0	0	0	0	0	0	0	0	2	1	0	1	13	0	0	1	0	0	0	0	80	0	1	0	0	0	0	0	0	0	0	0	0	0	2	0	0
Otu00148	Bacteria(100)	Proteobacteria(100)	Alphaproteobacteria(100)	Rhizobiales(100)	Rhizobiales_unclassified(100)	Rhizobiales_unclassified(100)	0	4	0	0	0	0	0	0	0	0	0	0	0	0	0	0	0	0	0	0	0	0	0	0	0	0	0	0	0	0	0	0	0	0	0	1	85	306	39	0	38	1787	136
Otu00151	Bacteria(100)	Firmicutes(100)	Clostridia(100)	Clostridiales(100)	Clostridiaceae_1(100)	Clostridium_sensu_stricto(100)	4	0	3	0	0	0	4	0	0	0	0	0	140	0	0	0	0	0	0	2	0	0	0	0	0	0	0	0	0	0	1598	64	50	27	19	177	0	222	33	0	157	0	142
Otu00150	Bacteria(100)	Proteobacteria(100)	Betaproteobacteria(100)	Burkholderiales(100)	Comamonadaceae(96)	Comamonadaceae_unclassified(67)	0	47	26	0	1	0	2	12	463	0	0	3	229	0	0	6	0	0	0	2	0	1	0	2	0	0	0	0	0	2	0	0	0	0	0	0	0	52	110	11	20	0	115
Otu00154	Bacteria(100)	Firmicutes(100)	Bacilli(100)	Lactobacillales(100)	Leuconostocaceae(100)	Leuconostocaceae_unclassified(100)	0	0	0	0	0	0	0	0	0	0	0	0	0	0	0	0	0	0	0	0	0	0	0	0	0	0	0	0	0	0	0	0	0	0	0	0	0	0	0	0	0	0	0
Otu00149	Bacteria(100)	Actinobacteria(100)	Actinobacteria(100)	Actinomycetales(100)	Pseudonocardiaceae(100)	Pseudonocardia(100)	7	40	17	2	0	12	3	20	1029	0	0	426	344	1	17	5	0	0	1	0	4	1	2	0	0	1	0	0	0	0	0	4	0	0	0	1	0	44	10	0	0	1288	0
Otu00153	Bacteria(100)	Actinobacteria(100)	Actinobacteria(100)	Actinomycetales(100)	Corynebacteriaceae(100)	Corynebacterium(100)	4	0	0	2	0	2	5	33	18	0	2	1	136	4	13	0	0	0	0	0	0	0	0	0	0	3	1	0	0	0	0	0	0	0	0	0	0	11	4	1	5	0	0
Otu00157	Bacteria(100)	Actinobacteria(100)	Actinobacteria(100)	Actinomycetales(100)	Actinomycetales_unclassified(89)	Actinomycetales_unclassified(89)	0	0	5	0	0	0	0	0	0	0	0	0	0	0	0	0	0	4	0	0	1	0	0	0	0	0	0	0	0	0	0	0	0	0	0	0	0	287	318	0	232	750	1048
Otu00158	Bacteria(100)	Bacteria_unclassified(100)	Bacteria_unclassified(100)	Bacteria_unclassified(100)	Bacteria_unclassified(100)	Bacteria_unclassified(100)	0	0	0	0	0	0	0	0	0	0	0	0	0	0	1	0	0	0	0	18	28	23	2	0	19	0	0	0	0	0	0	0	0	0	0	13	0	565	780	1	454	0	88
Otu00159	Bacteria(100)	Firmicutes(100)	Bacilli(100)	Lactobacillales(100)	Streptococcaceae(100)	Lactococcus(100)	0	0	0	0	0	0	0	0	0	0	0	0	0	5	0	0	0	0	0	0	0	0	0	0	0	0	0	0	0	0	0	0	0	0	0	0	0	0	0	1	0	1618	0
Otu00160	Bacteria(100)	Actinobacteria(100)	Actinobacteria(100)	Actinomycetales(100)	Actinomycetales_unclassified(100)	Actinomycetales_unclassified(100)	0	11	2	0	0	0	0	0	0	0	0	0	0	0	0	4	1	0	12	14	6	16	7	0	7	2	0	0	0	0	0	1	0	0	0	9	0	63	475	46	187	697	457
Otu00163	Bacteria(100)	Bacteria_unclassified(100)	Bacteria_unclassified(100)	Bacteria_unclassified(100)	Bacteria_unclassified(100)	Bacteria_unclassified(100)	0	0	0	0	0	0	0	0	0	0	0	0	0	0	5	0	0	24	0	0	0	2	0	0	0	4	0	0	0	0	0	0	0	0	0	0	0	0	0	0	0	0	0
Otu00156	Bacteria(100)	Actinobacteria(100)	Actinobacteria(100)	Actinomycetales(100)	Micrococcaceae(100)	Kocuria(93)	4	62	7	3	0	0	4	59	0	0	8	0	48	4	0	0	0	0	4	0	0	0	6	0	0	0	4	0	0	0	0	0	0	0	0	0	0	9	0	0	6	0	4
Otu00161	Bacteria(100)	Actinobacteria(100)	Actinobacteria(100)	Solirubrobacterales(100)	Solirubrobacterales_unclassified(94)	Solirubrobacterales_unclassified(94)	0	85	0	2	0	33	1	14	0	7	0	0	0	0	0	4	7	0	23	4	22	56	1	0	12	0	0	0	0	0	0	0	0	0	0	7	0	215	480	0	100	0	259
Otu00164	Bacteria(100)	Firmicutes(100)	Bacilli(100)	Lactobacillales(100)	Streptococcaceae(100)	Streptococcus(100)	0	5	11	2	0	9	0	2	0	0	1	0	0	0	13	0	0	0	0	0	0	1	0	0	0	1	1	0	0	0	0	0	0	0	0	0	0	52	0	2	31	0	202
Otu00165	Bacteria(100)	Firmicutes(100)	Bacilli(100)	Bacillales(100)	Staphylococcaceae(100)	Staphylococcaceae_unclassified(74)	8	104	3	0	0	18	36	0	212	0	0	0	0	4	0	0	0	0	0	0	0	0	0	0	0	5	0	0	0	0	0	0	0	0	0	0	0	0	0	0	16	0	8
Otu00166	Bacteria(100)	Firmicutes(100)	Clostridia(100)	Clostridiales(100)	Lachnospiraceae(100)	Lachnospiraceae_unclassified(100)	0	176	2	2	2	0	0	0	0	0	0	0	0	1	0	1	0	0	0	19	43	56	4	0	12	0	0	0	1	0	0	0	0	0	0	0	0	0	0	0	0	1106	0
Otu00162	Bacteria(100)	Bacteria_unclassified(85)	Bacteria_unclassified(85)	Bacteria_unclassified(85)	Bacteria_unclassified(85)	Bacteria_unclassified(85)	0	99	1	0	0	9	0	0	0	0	0	0	0	0	0	2	0	1	7	4	7	14	0	0	0	0	1	0	0	0	0	0	0	0	0	0	190	0	0	0	0	2579	0
Otu00167	Bacteria(100)	Actinobacteria(100)	Actinobacteria(100)	Actinomycetales(100)	Microbacteriaceae(100)	Microbacteriaceae_unclassified(100)	0	0	0	0	0	0	0	0	0	0	0	1	0	0	0	3	0	0	0	1	0	7	0	0	12	0	0	0	0	0	0	0	0	0	0	0	1	224	0	92	246	1	1201
Otu00155	Bacteria(100)	Firmicutes(100)	Bacilli(100)	Lactobacillales(100)	Leuconostocaceae(100)	Weissella(100)	3	34	13	1	0	9	3	0	722	2	0	0	0	174	0	12	0	0	0	1	13	39	0	0	23	0	0	0	0	0	9	0	0	0	0	3	0	394	62	20	478	0	616
Otu00168	Bacteria(100)	Proteobacteria(100)	Alphaproteobacteria(100)	Rhizobiales(100)	Rhizobiales_unclassified(95)	Rhizobiales_unclassified(95)	9	12	2	0	0	24	0	19	0	0	0	0	0	2	0	43	30	5	17	35	75	148	14	12	105	0	0	0	0	0	0	3	0	1	0	1	0	88	44	0	17	464	29
Otu00169	Bacteria(100)	Proteobacteria(100)	Alphaproteobacteria(100)	Rhizobiales(100)	Beijerinckiaceae(100)	Beijerinckiaceae_unclassified(79)	0	0	0	0	0	0	0	0	0	0	0	2	0	7	0	4	0	0	0	29	68	109	38	1	40	0	0	0	0	0	0	1	0	0	0	6	0	168	698	149	313	0	456
Otu00170	Bacteria(100)	Proteobacteria(100)	Alphaproteobacteria(100)	Rhodospirillales(100)	Acetobacteraceae(100)	Acetobacteraceae_unclassified(100)	0	0	0	0	0	0	0	0	0	0	0	0	0	0	0	0	0	0	0	0	0	2	0	0	0	0	0	0	0	0	0	0	0	0	0	0	60	95	563	91	50	2368	0
Otu00171	Bacteria(100)	Actinobacteria(100)	Actinobacteria(100)	Actinomycetales(100)	Micrococcaceae(100)	Arthrobacter(100)	0	0	0	0	0	0	0	0	0	0	0	0	0	0	0	0	0	0	0	0	0	0	0	0	0	0	0	0	0	0	0	0	0	0	0	0	0	0	0	0	0	0	0
Otu00173	Bacteria(100)	Actinobacteria(100)	Actinobacteria(100)	Actinomycetales(100)	Micrococcaceae(100)	Arthrobacter(100)	2	1	0	0	2	0	0	0	0	0	0	1	0	29	4	0	2	0	0	0	0	0	0	0	3	0	33	0	0	0	0	0	0	0	0	0	0	0	0	0	0	0	0
Otu00172	Bacteria(100)	Proteobacteria(100)	Betaproteobacteria(100)	Burkholderiales(100)	Oxalobacteraceae(100)	Massilia(53)	0	77	9	0	0	42	3	0	0	0	0	0	0	10	0	3	0	42	0	11	1	0	0	0	2	0	106	0	0	0	0	0	0	0	0	0	0	66	13	0	65	0	58
Otu00174	Bacteria(100)	Actinobacteria(100)	Actinobacteria(100)	Actinomycetales(100)	Streptomycetaceae(100)	Streptomyces(96)	7	161	9	4	7	602	5	17	314	0	0	0	0	3	0	5	8	0	0	0	6	6	3	1	18	0	0	0	0	0	10	3	0	0	0	0	0	58	73	0	52	0	37
Otu00176	Bacteria(100)	Firmicutes(100)	Bacilli(100)	Bacillales(100)	Bacillaceae_1(99)	Bacillus(99)	0	0	8	0	0	0	2	6	2	0	7	1	1	1	86	0	0	0	7	0	0	0	0	0	0	74	277	14	0	13	0	0	0	0	0	0	4	0	4	0	0	0	0
Otu00178	Bacteria(100)	Actinobacteria(100)	Actinobacteria(100)	Coriobacteriales(100)	Coriobacteriaceae(100)	Coriobacteriaceae_unclassified(100)	0	0	0	0	0	0	0	0	0	0	0	0	0	0	0	0	0	0	0	2	5	7	10	0	2	0	0	0	0	0	0	0	0	0	0	0	0	449	972	29	4	1603	0
Otu00177	Bacteria(100)	Actinobacteria(100)	Actinobacteria(100)	Actinomycetales(100)	Microbacteriaceae(100)	Leifsonia(95)	0	0	0	0	0	17	0	35	0	0	0	0	0	9	0	0	0	0	4	7	4	8	0	0	0	0	0	0	0	0	0	0	0	0	0	0	0	0	23	0	1	0	0
Otu00179	Bacteria(100)	Proteobacteria(100)	Betaproteobacteria(94)	Burkholderiales(94)	Burkholderiales_unclassified(94)	Burkholderiales_unclassified(94)	6	32	1	0	3	0	0	0	0	0	0	0	0	14	5	0	0	1	0	0	0	0	0	0	0	0	0	0	0	0	0	0	0	0	0	0	0	25	54	0	138	0	1
Otu00175	Bacteria(100)	Actinobacteria(100)	Actinobacteria(100)	Actinomycetales(100)	Mycobacteriaceae(81)	Mycobacterium(81)	6	5	0	0	2	71	0	122	0	0	0	4	0	0	192	54	29	3	3	2	16	16	15	0	24	2	0	0	0	0	6	8	2	1	0	9	0	115	97	59	59	0	391
Otu00180	Bacteria(100)	Actinobacteria(100)	Actinobacteria(100)	Actinomycetales(100)	Dermabacteraceae(100)	Brachybacterium(100)	0	24	4	2	0	0	0	0	0	0	0	0	184	84	31	0	0	0	0	0	0	0	0	0	0	0	0	0	0	0	0	0	0	0	0	0	0	0	0	0	8	0	0
Otu00182	Bacteria(100)	Proteobacteria(100)	Gammaproteobacteria(100)	Pseudomonadales(100)	Moraxellaceae(100)	Psychrobacter(100)	0	0	0	0	0	0	2	0	0	0	0	0	0	0	140	3	0	0	0	0	0	0	1	0	2	0	88	0	0	0	0	0	0	0	0	0	0	0	0	0	0	0	33
Otu00183	Bacteria(100)	Proteobacteria(100)	Alphaproteobacteria(100)	Rhodobacterales(100)	Rhodobacteraceae(100)	Paracoccus(100)	0	1	3	0	0	38	0	7	191	0	0	23	0	0	4	1	0	4	0	0	0	0	0	0	0	0	0	0	0	0	0	0	0	0	0	0	0	223	57	0	25	0	21
Otu00184	Bacteria(100)	Proteobacteria(100)	Betaproteobacteria(100)	Burkholderiales(100)	Comamonadaceae(58)	Comamonadaceae_unclassified(52)	0	0	0	0	0	0	0	0	0	0	0	0	0	0	0	3	2	0	0	0	2	2	14	5	0	1	0	1	0	0	0	0	0	0	0	0	0	0	0	0	1	0	0
Otu00185	Bacteria(100)	Bacteroidetes(100)	Bacteroidia(100)	Bacteroidales(100)	Prevotellaceae(100)	Prevotella(100)	0	0	0	0	0	0	1	0	0	0	0	0	0	0	12	1	2	0	0	0	0	2	0	1	0	4	35	0	0	1	0	0	0	0	0	0	0	0	0	0	0	0	0
Otu00186	Bacteria(100)	Actinobacteria(100)	Actinobacteria(100)	Actinomycetales(100)	Nocardioidaceae(100)	Nocardioidaceae_unclassified(94)	0	70	4	0	2	68	1	11	559	0	3	0	13	0	0	25	11	1	2	0	2	7	0	0	2	0	0	0	0	0	1	4	2	3	0	3	0	31	76	12	117	1	512
Otu00188	Bacteria(100)	Proteobacteria(100)	Alphaproteobacteria(100)	Alphaproteobacteria_unclassified(100)	Alphaproteobacteria_unclassified(100)	Alphaproteobacteria_unclassified(100)	0	16	2	0	18	30	0	0	0	0	0	0	0	0	194	2	57	0	8	0	0	0	0	0	1	0	0	0	0	0	0	0	0	0	0	0	0	192	0	1	89	0	0
Otu00189	Bacteria(100)	Bacteroidetes(100)	Bacteroidia(100)	Bacteroidales(100)	Bacteroidaceae(100)	Bacteroides(100)	0	0	0	0	0	0	0	0	0	0	0	0	0	55	0	0	0	5	0	0	0	0	1	0	0	0	1	0	0	0	0	0	0	0	0	0	0	0	0	0	0	0	0
Otu00190	Bacteria(100)	Verrucomicrobia(100)	Verrucomicrobiae(100)	Verrucomicrobiales(100)	Verrucomicrobiaceae(100)	Luteolibacter(100)	0	1	5	0	0	0	0	0	0	0	0	0	0	0	66	1	0	1	0	0	0	0	3	3	2	0	0	0	4	0	0	0	0	0	0	0	0	8	0	0	26	0	0
Otu00191	Bacteria(100)	Proteobacteria(100)	Alphaproteobacteria(100)	Rhizobiales(100)	Rhizobiales_unclassified(94)	Rhizobiales_unclassified(94)	1	0	0	0	0	0	2	1	0	0	0	0	0	10	0	0	0	6	0	0	0	1	4	0	2	0	0	0	0	0	0	0	0	0	0	0	0	233	1295	24	206	0	65
Otu00194	Bacteria(100)	Bacteria_unclassified(100)	Bacteria_unclassified(100)	Bacteria_unclassified(100)	Bacteria_unclassified(100)	Bacteria_unclassified(100)	0	0	0	0	0	0	0	0	0	0	0	0	0	0	388	4	0	0	0	0	0	2	10	0	5	0	0	0	0	0	0	0	0	0	0	0	0	263	473	0	222	0	98
Otu00195	Bacteria(100)	Actinobacteria(100)	Actinobacteria(100)	Solirubrobacterales(100)	Conexibacteraceae(93)	Conexibacter(93)	0	1	7	0	0	0	0	0	119	0	0	0	0	0	0	6	15	0	0	0	2	8	0	0	2	0	0	0	0	0	0	6	0	0	0	0	0	23	80	0	224	0	646
Otu00196	Bacteria(100)	Bacteria_unclassified(100)	Bacteria_unclassified(100)	Bacteria_unclassified(100)	Bacteria_unclassified(100)	Bacteria_unclassified(100)	0	0	0	0	0	0	0	0	0	0	0	0	0	0	9	0	0	0	0	0	0	0	0	0	0	0	0	0	0	0	0	0	0	0	0	0	0	0	0	0	0	0	0
Otu00193	Bacteria(100)	Actinobacteria(100)	Actinobacteria(100)	Actinomycetales(100)	Microbacteriaceae(100)	Microbacteriaceae_unclassified(100)	0	7	0	0	0	0	0	0	385	0	0	0	0	4	65	0	0	0	0	0	0	0	0	0	0	0	0	0	0	0	4	6	0	0	0	3	4	0	15	0	2	1436	17
Otu00197	Bacteria(100)	Bacteria_unclassified(100)	Bacteria_unclassified(100)	Bacteria_unclassified(100)	Bacteria_unclassified(100)	Bacteria_unclassified(100)	0	0	0	0	0	0	0	0	0	0	0	0	0	16	0	0	0	0	0	0	0	0	0	0	0	0	0	0	0	0	0	0	0	0	0	0	0	0	0	0	0	0	0
Otu00181	Bacteria(100)	Proteobacteria(100)	Alphaproteobacteria(100)	Rhizobiales(100)	Methylobacteriaceae(99)	Methylobacterium(97)	6	76	10	0	5	203	2	10	0	0	2	6	0	12	0	25	0	12	0	0	0	0	0	0	3	1	0	0	0	0	0	0	0	0	0	10	0	68	62	11	35	0	17
Otu00198	Bacteria(100)	Proteobacteria(100)	Alphaproteobacteria(100)	Sphingomonadales(100)	Sphingomonadaceae(100)	Sphingomonas(100)	0	8	0	0	0	0	0	0	0	0	0	0	0	0	0	0	0	0	0	0	0	0	0	0	0	0	0	0	0	0	0	0	0	0	0	0	0	2	0	0	0	0	0
Otu00199	Bacteria(100)	Firmicutes(100)	Clostridia(100)	Clostridiales(100)	Lachnospiraceae(100)	Lachnospiraceae_unclassified(100)	0	0	0	0	0	0	0	0	0	0	0	0	0	0	0	0	0	0	0	0	0	0	0	0	0	0	0	0	0	0	0	0	0	0	0	0	0	1389	607	202	42	0	145
Otu00200	Bacteria(100)	Proteobacteria(100)	Betaproteobacteria(100)	Betaproteobacteria_unclassified(100)	Betaproteobacteria_unclassified(100)	Betaproteobacteria_unclassified(100)	0	0	0	0	0	0	0	0	0	0	0	0	0	0	1	1	0	0	5	0	0	0	11	0	3	3	54	0	2	0	0	0	0	0	0	0	0	0	0	0	0	0	0
Otu00201	Bacteria(100)	Firmicutes(100)	Bacilli(100)	Lactobacillales(100)	Streptococcaceae(100)	Streptococcus(100)	1	0	12	0	0	0	3	0	591	0	0	24	251	0	7	3	0	0	0	0	0	0	1	0	0	0	0	0	0	0	0	0	0	0	0	0	0	0	0	0	1	0	0
Otu00202	Bacteria(100)	Proteobacteria(100)	Alphaproteobacteria(100)	Rhizobiales(94)	Rhizobiales_unclassified(94)	Rhizobiales_unclassified(94)	0	0	0	0	0	0	0	0	0	0	0	0	0	0	0	0	0	0	0	0	0	1	0	0	0	0	0	0	0	0	0	0	0	0	0	0	0	542	667	45	348	0	211
Otu00203	Bacteria(100)	Firmicutes(100)	Clostridia(100)	Clostridiales(100)	Lachnospiraceae(100)	Lachnospiraceae_unclassified(100)	0	0	0	0	0	0	0	0	0	0	0	0	0	0	52	3	0	8	5	0	1	0	1	15	2	1	0	1	1	4	0	0	0	0	0	0	0	0	0	0	0	0	0
Otu00204	Bacteria(100)	Firmicutes(100)	Clostridia(100)	Clostridiales(100)	Ruminococcaceae(100)	Clostridium_IV(100)	0	0	0	0	0	0	0	0	0	0	0	0	0	0	0	0	0	0	0	0	0	0	0	0	0	0	0	0	0	0	0	0	0	0	0	0	0	417	1629	93	265	0	113
Otu00187	Bacteria(100)	Actinobacteria(100)	Actinobacteria(100)	Solirubrobacterales(100)	Solirubrobacteraceae(100)	Solirubrobacter(100)	0	33	16	1	3	179	0	86	0	0	5	0	17	0	51	48	34	17	7	6	19	19	2	0	19	0	0	0	0	0	0	9	0	0	0	9	0	9	187	0	364	0	342
Otu00192	Bacteria(100)	Actinobacteria(100)	Actinobacteria(100)	Actinomycetales(100)	Nocardiaceae(99)	Gordonia(97)	0	0	0	0	0	31	0	1	0	0	0	0	0	0	0	2	0	0	0	0	0	3	0	0	0	0	52	0	0	0	0	0	0	0	0	0	0	0	0	0	16	0	118
Otu00206	Bacteria(100)	Actinobacteria(100)	Actinobacteria(100)	Solirubrobacterales(100)	Conexibacteraceae(100)	Conexibacter(100)	3	69	15	0	6	50	0	7	0	0	0	0	0	0	37	4	2	0	2	4	2	3	0	0	1	0	0	0	0	0	5	2	0	1	0	0	0	52	344	0	40	809	398
Otu00205	Bacteria(100)	Proteobacteria(100)	Alphaproteobacteria(100)	Rhizobiales(100)	Rhizobiales_unclassified(100)	Rhizobiales_unclassified(100)	13	65	5	0	0	61	0	20	0	0	0	0	56	23	0	22	11	2	9	32	21	58	19	0	30	0	0	0	0	0	0	0	0	0	0	0	143	113	58	0	15	0	34
Otu00122	Bacteria(100)	Proteobacteria(100)	Proteobacteria_unclassified(71)	Proteobacteria_unclassified(71)	Proteobacteria_unclassified(71)	Proteobacteria_unclassified(71)	1	61	8	0	3	0	0	0	0	0	0	0	189	14	0	11	0	11	0	0	2	0	5	0	1	0	2	0	0	0	0	0	0	0	0	1	8	148	13	0	85	0	6
Otu00207	Bacteria(100)	Proteobacteria(100)	Alphaproteobacteria(100)	Rhizobiales(100)	Rhizobiales_unclassified(92)	Rhizobiales_unclassified(92)	0	0	0	0	0	0	0	0	0	0	0	0	0	6	0	0	0	0	0	0	0	0	4	0	0	0	0	0	0	0	0	1	0	0	0	0	0	438	790	0	118	0	190
Otu00208	Bacteria(100)	Bacteria_unclassified(100)	Bacteria_unclassified(100)	Bacteria_unclassified(100)	Bacteria_unclassified(100)	Bacteria_unclassified(100)	0	0	0	0	0	0	0	0	0	0	0	0	0	0	0	0	0	0	0	0	0	0	0	0	0	0	0	0	1	0	0	0	0	0	0	0	0	0	0	0	0	0	0
Otu00209	Bacteria(100)	Actinobacteria(100)	Actinobacteria(100)	Actinomycetales(100)	Actinomycetales_unclassified(100)	Actinomycetales_unclassified(100)	0	0	0	0	0	0	0	0	0	0	0	0	0	0	0	22	6	1	6	3	3	18	0	0	6	0	0	0	0	0	7	11	0	0	0	10	0	175	593	0	95	0	388
Otu00211	Bacteria(100)	Firmicutes(100)	Bacilli(100)	Lactobacillales(100)	Carnobacteriaceae(100)	Desemzia(100)	0	0	0	0	0	0	0	0	0	0	0	0	0	0	26	0	0	0	0	0	0	0	0	0	0	0	25	0	0	0	0	0	0	0	0	0	0	0	0	0	7	0	0
Otu00213	Bacteria(100)	Firmicutes(100)	Clostridia(100)	Clostridiales(100)	Clostridiaceae_1(100)	Clostridium_sensu_stricto(100)	1	0	0	0	0	0	1	0	0	0	0	0	0	0	10	0	0	3	0	15	0	0	2	0	0	0	0	2	0	0	0	0	0	0	0	0	0	0	0	0	0	120	0
Otu00215	Bacteria(100)	Bacteroidetes(100)	Bacteroidia(100)	Bacteroidales(100)	Prevotellaceae(100)	Prevotella(100)	0	0	0	0	0	0	0	0	0	0	0	0	0	0	0	4	0	2	1	0	0	0	0	0	0	1	0	0	0	0	0	0	0	0	0	0	0	0	0	0	0	0	0
Otu00216	Bacteria(100)	Actinobacteria(100)	Actinobacteria(100)	Solirubrobacterales(100)	Solirubrobacterales_unclassified(96)	Solirubrobacterales_unclassified(96)	1	8	0	0	0	0	0	4	0	0	0	28	0	0	0	6	4	6	1	0	6	11	0	0	5	0	0	0	0	0	0	14	0	0	0	1	0	116	454	0	131	0	521
Otu00214	Bacteria(100)	Proteobacteria(100)	Betaproteobacteria(100)	Burkholderiales(100)	Comamonadaceae(94)	Comamonadaceae_unclassified(94)	1	4	1	0	0	0	4	0	236	0	0	0	69	6	7	2	0	0	0	7	0	2	3	11	0	0	11	0	1	0	0	0	0	0	0	0	0	0	0	0	7	0	0
Otu00218	Bacteria(100)	Planctomycetes(100)	Planctomycetacia(100)	Planctomycetales(100)	Planctomycetaceae(100)	Planctomycetaceae_unclassified(90)	0	0	0	0	0	0	0	0	0	0	0	0	0	0	0	0	0	0	0	0	0	0	0	0	0	0	0	0	0	0	0	0	0	0	0	0	0	221	1191	79	261	0	237
Otu00217	Bacteria(100)	Proteobacteria(100)	Alphaproteobacteria(100)	Sphingomonadales(100)	Sphingomonadaceae(100)	Sphingomonas(100)	0	634	0	0	0	0	1	0	0	0	0	0	0	0	22	0	0	0	0	0	0	2	0	0	0	0	0	0	0	0	0	0	0	0	0	0	0	122	0	0	70	1013	7
Otu00219	Bacteria(100)	Bacteroidetes(100)	Bacteroidetes_unclassified(100)	Bacteroidetes_unclassified(100)	Bacteroidetes_unclassified(100)	Bacteroidetes_unclassified(100)	0	0	0	0	0	0	0	0	0	0	0	0	0	0	173	3	0	1	0	0	0	0	0	0	0	0	0	0	0	0	0	0	0	0	0	0	0	0	0	0	0	0	0
Otu00220	Bacteria(100)	Bacteroidetes(100)	Bacteroidia(100)	Bacteroidales(100)	Bacteroidaceae(100)	Bacteroides(100)	4	40	0	0	0	0	0	0	0	0	0	0	0	306	0	1	1	0	0	0	0	0	0	1	1	1	40	0	0	5	0	0	0	0	0	0	0	0	0	0	0	0	0
Otu00221	Bacteria(100)	Proteobacteria(100)	Betaproteobacteria(100)	Burkholderiales(100)	Oxalobacteraceae(100)	Oxalobacteraceae_unclassified(68)	0	0	8	0	0	0	0	0	0	0	0	0	20	0	2	0	0	0	0	0	0	0	4	0	0	2	2	0	0	0	0	0	0	0	0	0	0	0	0	0	0	0	0
Otu00223	Bacteria(100)	Bacteroidetes(100)	Flavobacteria(100)	Flavobacteriales(100)	Flavobacteriaceae(100)	Flavobacterium(100)	0	0	0	0	0	0	0	0	0	0	0	0	0	0	249	1	2	4	4	0	1	0	13	13	3	1	119	4	0	0	0	0	0	0	0	0	0	0	0	0	0	0	0
Otu00224	Bacteria(100)	Firmicutes(100)	Bacilli(100)	Lactobacillales(100)	Lactobacillaceae(100)	Lactobacillus(100)	0	0	0	0	0	0	0	0	0	0	0	0	0	0	0	0	0	0	0	0	0	0	0	0	0	0	0	0	0	0	0	0	0	0	0	0	0	0	1	0	492	0	0
Otu00210	Bacteria(100)	Proteobacteria(100)	Alphaproteobacteria(100)	Rhizobiales(100)	Rhizobiales_unclassified(91)	Rhizobiales_unclassified(91)	0	1	2	0	0	0	11	10	0	0	0	0	0	2	0	0	0	0	3	0	8	4	1	2	0	0	0	0	0	0	0	0	0	0	0	6	0	158	426	61	298	0	50
Otu00225	Bacteria(100)	Actinobacteria(100)	Actinobacteria(100)	Actinomycetales(100)	Actinomycetales_unclassified(100)	Actinomycetales_unclassified(100)	0	7	0	0	0	129	0	0	0	0	0	0	0	0	0	0	0	1	0	4	33	38	0	1	22	0	0	0	0	0	0	0	0	0	0	7	6	114	155	408	16	0	74
Otu00226	Bacteria(100)	Proteobacteria(100)	Betaproteobacteria(100)	Methylophilales(100)	Methylophilaceae(100)	Methylophilus(100)	1	0	0	0	0	0	0	0	0	0	0	0	0	2	0	0	0	1	0	0	0	0	0	0	0	0	0	0	0	0	0	0	1	0	0	0	0	1	0	0	2	0	0
Otu00227	Bacteria(100)	Firmicutes(100)	Bacilli(100)	Lactobacillales(100)	Lactobacillaceae(100)	Lactobacillus(85)	0	0	2	0	0	0	0	618	4	0	129	122	876	0	0	1	4	0	0	0	0	10	3	24	2	0	0	0	0	0	0	0	0	0	0	0	0	0	0	0	0	0	0
Otu00212	Bacteria(100)	Actinobacteria(100)	Actinobacteria(100)	Actinomycetales(100)	Corynebacteriaceae(100)	Corynebacterium(100)	4	2	0	0	0	0	2	14	0	0	20	113	36	2	4	0	4	0	0	0	0	0	0	0	0	1	0	0	0	0	0	0	0	0	0	0	0	2	0	0	0	0	0
Otu00228	Bacteria(100)	Actinobacteria(100)	Actinobacteria(100)	Actinomycetales(100)	Actinomycetales_unclassified(99)	Actinomycetales_unclassified(99)	1	29	0	0	0	0	0	0	0	0	0	0	0	0	3	24	1	0	1	11	23	22	18	0	18	0	0	0	0	0	0	0	0	0	0	0	39	81	325	0	165	553	87
Otu00229	Bacteria(100)	Proteobacteria(100)	Alphaproteobacteria(100)	Rhodospirillales(100)	Acetobacteraceae(100)	Acetobacteraceae_unclassified(100)	0	0	0	0	0	0	0	0	0	0	0	0	0	0	0	0	0	0	0	0	0	0	0	0	0	0	0	0	0	0	0	0	0	0	0	0	0	0	0	0	0	0	0
Otu00230	Bacteria(100)	Firmicutes(100)	Firmicutes_unclassified(100)	Firmicutes_unclassified(100)	Firmicutes_unclassified(100)	Firmicutes_unclassified(100)	0	0	0	0	0	0	0	0	0	0	0	0	0	0	0	0	0	0	0	0	0	0	0	0	0	0	0	0	0	0	0	0	0	0	0	0	0	285	350	2	259	1098	145
Otu00231	Bacteria(100)	Bacteria_unclassified(97)	Bacteria_unclassified(97)	Bacteria_unclassified(97)	Bacteria_unclassified(97)	Bacteria_unclassified(97)	0	0	0	0	0	0	0	0	0	0	0	0	0	6	0	0	0	0	0	0	0	0	0	13	0	0	0	0	0	0	0	0	0	0	0	0	0	0	0	0	0	0	0
Otu00233	Bacteria(100)	Firmicutes(100)	Clostridia(100)	Clostridiales(100)	Clostridiales_unclassified(100)	Clostridiales_unclassified(100)	0	5	0	0	0	0	0	0	0	0	0	0	0	0	0	0	0	0	0	0	3	3	0	0	1	0	0	0	0	0	0	0	0	0	0	0	0	0	0	0	2	2014	0
Otu00236	Bacteria(100)	Actinobacteria(100)	Actinobacteria(100)	Actinomycetales(100)	Actinomycetales_unclassified(100)	Actinomycetales_unclassified(100)	0	0	0	0	0	52	0	0	0	0	0	0	0	0	0	1	2	2	0	0	5	2	6	0	0	0	0	0	0	0	0	0	0	0	0	0	0	0	0	0	41	1280	34
Otu00238	Bacteria(100)	Firmicutes(100)	Clostridia(100)	Clostridiales(100)	Clostridiales_unclassified(100)	Clostridiales_unclassified(100)	1	3	10	0	2	0	0	0	0	0	0	0	0	0	33	0	0	0	1	0	0	0	0	0	0	0	0	0	0	0	0	0	0	0	0	0	0	0	0	0	0	0	0
Otu00239	Bacteria(100)	Bacteria_unclassified(100)	Bacteria_unclassified(100)	Bacteria_unclassified(100)	Bacteria_unclassified(100)	Bacteria_unclassified(100)	0	30	0	0	0	0	0	0	0	0	0	0	0	0	0	0	0	0	1	0	0	0	0	0	0	0	0	0	0	0	0	0	0	0	0	0	283	0	0	0	0	1706	0
Otu00240	Bacteria(100)	Firmicutes(100)	Clostridia(100)	Clostridiales(100)	Ruminococcaceae(100)	Clostridium_IV(100)	0	0	0	0	0	0	0	0	0	0	0	0	0	0	0	0	0	0	0	0	1	3	0	0	0	0	0	0	0	0	0	0	0	0	0	0	0	0	0	0	0	2099	0
Otu00234	Bacteria(100)	Firmicutes(100)	Clostridia(100)	Clostridiales(100)	Clostridiales_Incertae_Sedis_XIII(99)	Anaerovorax(99)	0	14	1	0	0	0	0	0	0	0	0	0	0	6	0	9	3	1	0	0	1	0	0	0	0	0	0	0	0	0	0	0	0	0	0	0	0	0	0	0	0	72	0
Otu00232	Bacteria(100)	Actinobacteria(100)	Actinobacteria(100)	Actinomycetales(100)	Actinomycetales_unclassified(89)	Actinomycetales_unclassified(89)	6	8	16	0	0	0	16	4	246	0	0	0	318	0	0	0	0	0	0	0	0	0	0	0	0	0	0	0	0	0	0	0	0	1	0	0	0	0	0	0	1	0	0
Otu00241	Bacteria(100)	Bacteroidetes(100)	Bacteroidetes_unclassified(100)	Bacteroidetes_unclassified(100)	Bacteroidetes_unclassified(100)	Bacteroidetes_unclassified(100)	0	0	0	0	0	64	0	0	0	0	0	0	0	0	0	0	0	3	5	0	0	2	2	12	0	0	147	0	0	0	0	0	0	0	0	0	0	126	0	0	22	31	0
Otu00235	Bacteria(100)	Proteobacteria(100)	Gammaproteobacteria(100)	Xanthomonadales(100)	Xanthomonadaceae(100)	Stenotrophomonas(99)	2	20	4	0	0	0	0	0	30	0	0	33	0	1	0	0	0	0	0	0	0	0	0	3	1	0	0	0	0	0	0	0	0	0	0	8	0	109	0	53	53	0	0
Otu00243	Bacteria(100)	Actinobacteria(100)	Actinobacteria(100)	Actinomycetales(100)	Actinomycetales_unclassified(100)	Actinomycetales_unclassified(100)	0	0	0	0	0	0	0	0	0	0	1	0	0	2	1	0	8	0	0	0	0	0	0	0	0	0	0	3	0	0	0	0	0	0	0	6	0	20	8	0	77	0	120
Otu00244	Bacteria(100)	Actinobacteria(100)	Actinobacteria(100)	Actinomycetales(100)	Microbacteriaceae(69)	Agromyces(69)	0	0	0	0	0	0	0	0	0	0	0	0	0	0	0	1	0	2	0	1	1	0	2	2	1	0	0	1	0	0	0	0	0	0	0	0	0	0	0	0	2	0	0
Otu00246	Bacteria(100)	Proteobacteria(100)	Gammaproteobacteria(100)	Aeromonadales(100)	Aeromonadaceae(100)	Aeromonas(100)	5	16	0	0	8	30	3	0	1	0	0	0	0	0	206	0	0	1	0	1	0	0	0	3	0	1	0	0	0	0	0	0	0	0	0	0	0	7	0	0	0	0	0
Otu00247	Bacteria(100)	Bacteroidetes(100)	Bacteroidetes_unclassified(100)	Bacteroidetes_unclassified(100)	Bacteroidetes_unclassified(100)	Bacteroidetes_unclassified(100)	0	0	0	0	0	0	0	0	0	0	0	0	0	0	50	0	0	5	0	0	0	0	0	0	0	2	0	0	0	0	0	0	0	0	0	0	0	0	2	0	0	0	0
Otu00248	Bacteria(100)	Proteobacteria(100)	Gammaproteobacteria(100)	Oceanospirillales(100)	Halomonadaceae(100)	Halomonas(100)	0	0	0	0	0	0	0	0	0	0	0	0	0	0	18	0	0	3	0	19	0	0	2	0	0	5	63	0	0	6	0	0	0	0	0	0	0	0	0	0	0	0	0
Otu00242	Bacteria(100)	Proteobacteria(100)	Alphaproteobacteria(100)	Rhizobiales(100)	Phyllobacteriaceae(100)	Aminobacter(90)	0	1	0	0	0	11	0	5	0	0	0	0	0	0	0	7	8	20	0	14	4	9	0	3	7	2	0	0	0	0	9	0	40	0	0	15	372	213	57	0	410	0	207
Otu00245	Bacteria(100)	Proteobacteria(100)	Alphaproteobacteria(100)	Rhizobiales(100)	Rhizobiales_unclassified(100)	Rhizobiales_unclassified(100)	0	22	18	0	0	23	0	28	0	2	0	0	0	1	0	18	10	4	6	12	19	29	4	0	9	0	0	0	0	0	0	0	0	0	0	0	0	0	0	0	0	0	0
Otu00249	Bacteria(100)	Actinobacteria(100)	Actinobacteria(100)	Actinomycetales(100)	Actinomycetales_unclassified(100)	Actinomycetales_unclassified(100)	0	0	0	0	0	0	0	0	0	0	0	0	0	0	0	0	0	0	0	0	0	0	0	0	0	0	0	0	0	0	0	0	0	0	0	0	0	0	0	0	0	0	0
Otu00251	Bacteria(100)	Firmicutes(100)	Clostridia(100)	Clostridiales(100)	Ruminococcaceae(100)	Ruminococcaceae_unclassified(100)	0	47	0	0	0	0	0	0	0	0	0	0	0	0	0	0	0	0	0	2	1	2	0	0	2	0	0	0	0	0	0	0	0	0	0	0	0	0	0	0	0	1662	0
Otu00252	Bacteria(100)	Proteobacteria(100)	Gammaproteobacteria(100)	Xanthomonadales(100)	Xanthomonadaceae(100)	Xanthomonadaceae_unclassified(100)	0	0	0	0	0	0	0	0	0	0	0	0	0	0	0	0	0	0	0	0	0	0	0	0	0	0	0	0	0	0	0	0	0	0	0	0	0	0	0	0	1	1964	0
Otu00254	Bacteria(100)	Firmicutes(100)	Clostridia(100)	Clostridiales(100)	Ruminococcaceae(100)	Faecalibacterium(100)	0	0	0	0	0	0	0	0	0	0	0	0	0	262	24	4	5	10	3	0	0	0	4	0	0	2	0	1	0	4	0	0	0	0	0	0	0	0	0	0	0	0	0
Otu00253	Bacteria(100)	Proteobacteria(100)	Alphaproteobacteria(92)	Rhizobiales(92)	Rhizobiaceae(77)	Rhizobium(73)	1	0	0	0	0	2	0	0	0	0	0	0	0	0	0	6	0	2	0	0	5	8	2	14	8	0	0	0	0	0	0	0	0	0	0	1	0	142	37	0	25	0	0
Otu00255	Bacteria(100)	Bacteroidetes(100)	Flavobacteria(100)	Flavobacteriales(100)	Flavobacteriaceae(100)	Flavobacterium(100)	0	0	0	0	0	0	0	0	0	0	0	0	0	0	0	0	0	0	0	7	0	4	1	1	4	0	46	0	0	1	0	0	0	0	0	0	0	14	0	151	0	0	0
Otu00259	Bacteria(100)	Actinobacteria(100)	Actinobacteria(100)	Actinomycetales(100)	Actinomycetales_unclassified(98)	Actinomycetales_unclassified(98)	0	13	0	0	0	0	0	0	23	0	0	0	1	0	0	16	0	0	0	0	0	0	0	0	0	0	0	0	0	0	0	0	0	1	0	0	0	1025	212	11	15	0	158
Otu00257	Bacteria(100)	Actinobacteria(100)	Actinobacteria(100)	Actinomycetales(100)	Nocardiaceae(100)	Rhodococcus(100)	0	0	0	0	0	0	0	0	0	0	2	0	0	0	0	1	0	0	0	0	0	0	0	0	0	0	0	0	0	0	0	1	0	2	0	19	0	95	125	0	296	0	668
Otu00260	Bacteria(100)	Bacteroidetes(100)	Bacteroidia(100)	Bacteroidales(100)	Porphyromonadaceae(100)	Paludibacter(100)	0	0	0	0	0	0	0	0	0	0	0	0	0	0	0	0	0	2	0	0	0	0	0	0	0	0	0	0	0	0	0	0	0	0	0	0	0	0	0	0	0	0	0
Otu00256	Bacteria(100)	Actinobacteria(93)	Actinobacteria(93)	Actinobacteria_unclassified(93)	Actinobacteria_unclassified(93)	Actinobacteria_unclassified(93)	0	8	0	0	0	41	0	3	1	0	0	2	94	0	0	23	7	1	0	13	8	12	0	0	3	0	0	0	0	0	0	0	0	0	0	5	0	146	391	2	30	0	226
Otu00262	Bacteria(100)	Verrucomicrobia(100)	Verrucomicrobiae(100)	Verrucomicrobiales(100)	Verrucomicrobiaceae(100)	Akkermansia(100)	0	0	0	0	0	0	0	0	0	0	0	0	0	0	0	0	0	0	0	0	0	0	0	0	0	0	0	0	0	0	0	0	0	0	0	0	0	0	0	0	0	0	1
Otu00261	Bacteria(100)	Firmicutes(100)	Clostridia(100)	Clostridiales(100)	Clostridiales_unclassified(100)	Clostridiales_unclassified(100)	0	0	0	0	5	34	0	0	0	0	0	0	0	3	0	0	0	0	0	0	9	12	0	0	2	0	0	0	0	0	0	0	0	0	0	0	1	0	0	0	0	1437	0
Otu00263	Bacteria(100)	Proteobacteria(100)	Gammaproteobacteria(100)	Gammaproteobacteria_unclassified(100)	Gammaproteobacteria_unclassified(100)	Gammaproteobacteria_unclassified(100)	0	45	0	0	0	0	0	0	0	0	0	0	0	4	0	1	0	0	0	0	2	6	0	0	2	0	0	0	0	0	0	0	0	0	0	0	11	0	0	0	12	0	0
Otu00222	Bacteria(100)	Proteobacteria(100)	Gammaproteobacteria(100)	Pseudomonadales(100)	Moraxellaceae(100)	Moraxellaceae_unclassified(100)	3	0	7	0	14	0	0	22	0	0	0	0	0	0	0	0	5	0	0	0	0	0	0	0	0	0	0	0	0	0	0	0	0	0	0	0	0	0	0	0	10	0	0
Otu00264	Bacteria(100)	Actinobacteria(100)	Actinobacteria(100)	Solirubrobacterales(100)	Conexibacteraceae(100)	Conexibacter(100)	2	0	3	0	0	0	0	0	0	0	0	0	0	0	0	0	0	0	0	0	4	5	0	0	3	0	0	0	0	0	0	14	0	0	0	5	0	243	182	53	39	554	67
Otu00266	Bacteria(100)	Proteobacteria(100)	Alphaproteobacteria(100)	Rhodospirillales(100)	Acetobacteraceae(100)	Acetobacteraceae_unclassified(100)	0	0	0	0	0	0	0	0	0	0	0	0	0	0	0	0	0	0	0	0	0	0	0	0	0	0	0	0	0	0	0	0	0	0	0	0	0	9	0	0	0	0	0
Otu00268	Bacteria(100)	Proteobacteria(100)	Gammaproteobacteria(100)	Gammaproteobacteria_order_incertae_sedis(100)	Gammaproteobacteria_family_incertae_sedis(100)	Orbus(100)	0	0	0	0	0	0	0	0	0	0	0	0	0	0	0	0	0	0	0	0	0	0	0	0	0	0	0	0	0	0	0	0	0	0	0	0	0	28	119	0	18	1607	0
Otu00258	Bacteria(100)	Actinobacteria(100)	Actinobacteria(100)	Actinomycetales(100)	Streptomycetaceae(100)	Streptomyces(99)	0	30	0	0	0	32	0	15	553	0	0	0	0	0	0	10	2	0	7	0	4	4	3	0	2	2	0	0	0	0	0	0	0	0	0	0	0	129	47	0	3	0	0
Otu00270	Bacteria(100)	Actinobacteria(100)	Actinobacteria(100)	Coriobacteriales(100)	Coriobacteriaceae(100)	Coriobacteriaceae_unclassified(100)	0	0	0	0	0	0	0	0	0	0	0	0	0	0	0	0	0	0	0	0	0	0	0	0	0	0	0	0	0	0	0	0	0	0	0	0	0	26	29	0	22	1428	170
Otu00271	Bacteria(100)	Proteobacteria(100)	Gammaproteobacteria(100)	Pseudomonadales(100)	Moraxellaceae(100)	Moraxellaceae_unclassified(100)	0	0	0	0	0	0	0	0	0	0	0	0	0	0	0	5	0	0	0	0	0	0	1	0	3	6	0	0	1	0	0	0	0	0	0	0	0	0	0	0	0	0	0
Otu00272	Bacteria(100)	Actinobacteria(100)	Actinobacteria(100)	Actinomycetales(100)	Actinomycetaceae(100)	Actinomycetaceae_unclassified(100)	0	0	0	0	0	0	0	0	0	0	0	0	0	0	0	0	0	0	0	0	0	0	0	0	0	0	0	0	0	0	0	4	0	0	0	0	0	309	641	100	107	0	87
Otu00267	Bacteria(100)	Bacteria_unclassified(83)	Bacteria_unclassified(83)	Bacteria_unclassified(83)	Bacteria_unclassified(83)	Bacteria_unclassified(83)	0	6	2	0	0	46	0	0	0	0	0	0	0	5	0	2	0	0	0	0	0	0	0	0	0	0	0	0	0	0	0	0	0	0	0	0	312	0	0	0	0	1150	0
Otu00265	Bacteria(100)	Proteobacteria(100)	Alphaproteobacteria(100)	Rhizobiales(100)	Bradyrhizobiaceae(100)	Bosea(100)	0	0	0	0	0	0	0	0	0	0	0	0	0	0	0	19	7	19	13	0	2	0	0	0	0	0	0	0	0	0	0	10	0	0	0	3	11	373	159	42	57	0	91
Otu00273	Bacteria(100)	Bacteria_unclassified(100)	Bacteria_unclassified(100)	Bacteria_unclassified(100)	Bacteria_unclassified(100)	Bacteria_unclassified(100)	0	0	0	0	0	0	0	0	0	0	0	0	0	0	0	0	0	0	0	0	0	0	0	0	0	0	0	0	0	0	0	0	0	0	1	0	0	0	0	0	0	0	0
Otu00275	Bacteria(100)	Deinococcus-Thermus(100)	Deinococci(100)	Deinococcales(100)	Deinococcaceae(100)	Deinococcus(100)	0	0	0	0	0	0	0	0	0	0	0	0	0	0	0	0	0	0	0	0	0	0	0	0	0	0	0	0	0	0	0	0	0	0	0	0	0	244	53	0	431	0	556
Otu00276	Bacteria(100)	Proteobacteria(100)	Alphaproteobacteria(100)	Rhizobiales(100)	Rhizobiales_unclassified(100)	Rhizobiales_unclassified(100)	0	0	0	0	0	0	0	0	0	0	0	0	0	0	0	0	0	0	0	0	0	0	1	0	0	0	0	0	0	0	0	0	0	0	0	0	0	556	269	30	29	0	8
Otu00277	Bacteria(100)	Proteobacteria(100)	Alphaproteobacteria(100)	Rhizobiales(100)	Rhizobiales_unclassified(95)	Rhizobiales_unclassified(95)	0	0	0	0	0	0	0	0	0	0	0	0	12	0	0	0	0	0	0	0	0	0	0	0	1	0	0	0	0	0	0	0	0	0	0	0	0	484	250	1	236	0	201
Otu00274	Bacteria(100)	Proteobacteria(100)	Alphaproteobacteria(100)	Rhizobiales(100)	Methylobacteriaceae(100)	Methylobacterium(100)	0	1	0	0	0	0	0	0	0	0	0	0	0	0	0	0	0	0	0	0	0	0	0	0	0	0	0	0	0	0	0	0	0	0	0	0	0	390	344	1	113	0	125
Otu00269	Bacteria(100)	Proteobacteria(100)	Alphaproteobacteria(100)	Rhizobiales(100)	Rhizobiaceae(98)	Rhizobium(98)	0	3	0	0	0	0	0	0	0	0	0	0	0	0	0	1	0	0	0	0	0	0	0	0	0	0	0	0	0	0	0	0	0	0	0	0	0	0	0	0	3	0	0
Otu00280	Bacteria(100)	Proteobacteria(100)	Epsilonproteobacteria(100)	Campylobacterales(100)	Campylobacteraceae(100)	Arcobacter(100)	0	0	0	0	0	0	0	0	0	0	0	0	0	0	32	1	1	0	9	11	0	1	8	29	0	5	15	1	2	0	0	0	0	0	0	0	0	0	0	0	0	0	0
Otu00281	Bacteria(100)	Firmicutes(100)	Clostridia(100)	Clostridiales(100)	Clostridiales_unclassified(100)	Clostridiales_unclassified(100)	0	0	0	0	0	0	0	0	0	0	0	0	0	0	0	0	0	0	0	0	0	0	0	0	0	0	0	0	0	0	0	0	0	0	0	0	0	0	0	0	0	1642	0
Otu00278	Bacteria(100)	Proteobacteria(100)	Gammaproteobacteria(100)	Pseudomonadales(100)	Moraxellaceae(100)	Enhydrobacter(100)	1	55	7	0	0	0	4	24	397	0	1	0	0	6	96	0	0	0	0	0	0	0	0	0	0	2	25	0	0	0	0	0	0	0	0	0	0	0	0	0	0	0	0
Otu00282	Bacteria(100)	Actinobacteria(100)	Actinobacteria(100)	Actinomycetales(100)	Actinomycetales_unclassified(100)	Actinomycetales_unclassified(100)	0	0	0	0	0	0	0	7	0	0	0	0	0	0	222	0	13	0	0	1	0	0	0	0	0	0	23	0	1	2	0	4	0	0	0	0	0	1	1	0	0	0	0
Otu00283	Bacteria(100)	Bacteria_unclassified(100)	Bacteria_unclassified(100)	Bacteria_unclassified(100)	Bacteria_unclassified(100)	Bacteria_unclassified(100)	0	0	0	0	0	0	0	0	0	0	0	0	0	0	0	0	0	0	0	0	2	0	0	0	0	0	0	0	0	0	0	0	0	0	0	0	0	0	0	0	0	0	0
Otu00284	Bacteria(100)	Proteobacteria(100)	Gammaproteobacteria(100)	Legionellales(100)	Legionellaceae(100)	Legionella(100)	0	0	0	0	0	0	0	0	0	0	0	0	0	0	0	0	0	0	0	0	0	0	0	0	0	0	0	0	0	0	0	0	0	0	0	0	0	0	0	0	0	0	0
Otu00285	Bacteria(100)	Proteobacteria(100)	Betaproteobacteria(97)	Burkholderiales(97)	Oxalobacteraceae(97)	Duganella(65)	2	0	2	0	0	0	1	0	0	0	0	0	0	1	43	0	2	3	3	0	0	2	0	0	0	0	6	0	0	0	0	0	0	0	0	0	0	149	0	0	64	0	47
Otu00286	Bacteria(100)	Bacteria_unclassified(100)	Bacteria_unclassified(100)	Bacteria_unclassified(100)	Bacteria_unclassified(100)	Bacteria_unclassified(100)	0	18	0	0	0	10	0	0	0	0	0	0	0	0	0	0	0	0	0	0	13	37	0	0	3	1	0	0	0	0	0	0	0	0	0	0	0	15	94	0	11	0	35
Otu00288	Bacteria(100)	Firmicutes(100)	Clostridia(100)	Clostridiales(100)	Ruminococcaceae(100)	Ruminococcaceae_unclassified(100)	0	0	0	0	0	0	0	0	0	0	0	0	0	0	0	0	0	0	0	0	0	0	0	0	0	0	0	0	0	0	0	0	0	0	0	0	0	0	0	0	0	1614	0
Otu00290	Bacteria(100)	Actinobacteria(100)	Actinobacteria(100)	Solirubrobacterales(89)	Solirubrobacterales_unclassified(89)	Solirubrobacterales_unclassified(89)	1	0	1	3	0	0	0	3	0	0	0	0	0	0	0	2	1	0	0	0	0	2	0	0	0	0	0	0	0	0	0	0	0	0	0	0	0	127	141	0	294	1	495
Otu00291	Bacteria(100)	Planctomycetes(100)	Planctomycetacia(100)	Planctomycetales(100)	Planctomycetaceae(100)	Singulisphaera(100)	0	0	0	0	0	0	0	0	0	0	0	0	0	0	0	0	0	0	0	0	0	0	0	0	0	0	0	0	0	0	0	0	0	0	0	0	0	139	669	91	400	0	0
Otu00293	Bacteria(100)	Bacteroidetes(100)	Bacteroidia(100)	Bacteroidales(100)	Porphyromonadaceae(100)	Porphyromonadaceae_unclassified(100)	0	0	0	0	0	0	0	0	0	0	0	0	0	0	0	0	0	0	0	0	0	0	0	0	0	0	0	0	0	0	0	0	0	0	0	0	0	0	0	0	0	0	0
Otu00279	Bacteria(100)	Actinobacteria(100)	Actinobacteria(100)	Solirubrobacterales(90)	Solirubrobacterales_unclassified(76)	Solirubrobacterales_unclassified(76)	0	101	0	0	0	0	0	30	0	0	0	0	32	0	0	7	3	4	2	0	6	9	0	0	6	0	0	0	0	0	0	2	0	0	0	8	0	79	148	0	74	0	487
Otu00292	Bacteria(100)	Firmicutes(100)	Bacilli(100)	Lactobacillales(100)	Enterococcaceae(99)	Enterococcaceae_unclassified(90)	0	0	0	0	0	13	0	457	2	0	8	21	541	17	0	0	0	0	1	0	1	0	0	0	0	0	0	0	0	0	0	2	0	0	0	0	1	0	1	0	7	0	0
Otu00295	Bacteria(100)	Bacteroidetes(100)	Bacteroidetes_unclassified(100)	Bacteroidetes_unclassified(100)	Bacteroidetes_unclassified(100)	Bacteroidetes_unclassified(100)	0	0	0	0	0	0	0	0	0	0	0	0	0	0	0	0	0	0	0	0	0	0	0	0	0	0	0	0	0	0	0	0	0	0	0	0	0	0	0	0	0	0	0
Otu00296	Bacteria(100)	Actinobacteria(100)	Actinobacteria(100)	Coriobacteriales(100)	Coriobacteriaceae(100)	Collinsella(100)	0	0	0	0	0	0	0	0	0	0	0	0	0	0	0	0	0	0	0	0	0	0	0	0	0	0	0	0	0	0	0	0	0	0	0	0	0	0	0	0	0	0	0
Otu00298	Bacteria(100)	Proteobacteria(100)	Alphaproteobacteria(100)	Rhodospirillales(100)	Acetobacteraceae(100)	Acetobacteraceae_unclassified(100)	0	37	0	0	0	0	0	0	0	0	0	0	0	0	0	0	0	0	0	0	0	1	0	0	0	0	0	0	0	0	0	0	0	0	0	0	0	5	20	0	109	722	0
Otu00301	Bacteria(100)	Bacteria_unclassified(100)	Bacteria_unclassified(100)	Bacteria_unclassified(100)	Bacteria_unclassified(100)	Bacteria_unclassified(100)	0	0	0	0	0	0	0	0	0	0	0	0	0	0	0	0	0	0	0	0	0	0	0	0	2	0	0	0	0	0	0	2	0	0	0	0	0	72	152	0	32	1073	99
Otu00302	Bacteria(100)	Bacteroidetes(100)	Bacteroidetes_unclassified(100)	Bacteroidetes_unclassified(100)	Bacteroidetes_unclassified(100)	Bacteroidetes_unclassified(100)	0	0	0	0	0	0	0	0	0	0	0	0	0	0	0	0	0	0	0	0	0	0	0	0	0	0	0	0	0	0	0	0	0	0	0	0	0	0	0	0	0	0	0
Otu00300	Bacteria(100)	Proteobacteria(100)	Betaproteobacteria(100)	Burkholderiales(100)	Burkholderiaceae(100)	Burkholderia(100)	0	61	12	0	0	0	0	0	0	0	0	0	0	0	0	0	0	0	1	0	1	0	4	0	97	0	0	0	0	0	0	0	0	0	0	0	67	19	136	0	128	0	0
Otu00304	Bacteria(100)	Actinobacteria(100)	Actinobacteria(100)	Solirubrobacterales(100)	Patulibacteraceae(100)	Patulibacter(100)	0	0	0	0	0	0	0	0	0	0	0	0	0	0	0	0	0	0	0	0	0	0	0	0	0	0	0	0	0	0	0	0	0	0	0	0	0	4	0	0	204	0	850
Otu00303	Bacteria(100)	Bacteria_unclassified(100)	Bacteria_unclassified(100)	Bacteria_unclassified(100)	Bacteria_unclassified(100)	Bacteria_unclassified(100)	0	20	0	0	0	36	1	0	0	0	0	0	0	0	0	0	0	0	0	0	0	0	0	0	0	203	0	0	0	0	4	0	0	0	0	0	0	0	0	0	0	0	0
Otu00306	Bacteria(100)	Bacteroidetes(100)	Bacteroidia(100)	Bacteroidales(100)	Bacteroidaceae(100)	Bacteroides(100)	0	0	0	0	0	0	0	0	0	0	0	0	0	0	0	0	0	0	0	0	0	0	0	0	0	0	0	0	0	0	0	0	0	0	0	0	0	0	0	0	0	0	0
Otu00297	Bacteria(100)	Firmicutes(100)	Clostridia(100)	Clostridiales(100)	Clostridiaceae_1(100)	Clostridium_sensu_stricto(100)	0	5	0	0	0	0	0	0	0	0	0	0	0	1	0	3	0	0	0	0	0	0	4	0	0	0	0	0	0	0	0	0	0	0	0	0	0	0	0	0	0	0	0
Otu00299	Bacteria(100)	Actinobacteria(100)	Actinobacteria(100)	Actinomycetales(100)	Micrococcaceae(100)	Arthrobacter(87)	2	3	1	0	1	43	0	14	1	0	0	0	0	0	0	2	0	2	0	0	0	1	4	0	0	1	0	0	0	0	0	4	1	0	0	4	0	0	0	0	0	0	0
Otu00305	Bacteria(100)	Proteobacteria(100)	Alphaproteobacteria(100)	Rhizobiales(100)	Hyphomicrobiaceae(100)	Hyphomicrobium(100)	0	43	0	0	0	0	0	0	0	0	0	0	0	2	0	51	15	14	2	5	9	21	22	3	13	0	0	0	0	0	0	0	0	0	0	6	0	136	51	0	13	0	0
Otu00308	Bacteria(100)	Proteobacteria(100)	Alphaproteobacteria(100)	Rhodospirillales(100)	Acetobacteraceae(100)	Acetobacteraceae_unclassified(100)	0	0	0	0	0	0	0	0	0	0	0	0	0	0	0	0	0	0	0	0	0	0	0	0	2	0	0	0	0	0	0	0	0	0	0	0	0	298	549	136	71	0	45
Otu00309	Bacteria(100)	Proteobacteria(100)	Proteobacteria_unclassified(100)	Proteobacteria_unclassified(100)	Proteobacteria_unclassified(100)	Proteobacteria_unclassified(100)	0	0	0	0	0	0	0	0	0	0	0	0	0	0	0	0	0	0	0	0	0	0	0	0	0	0	0	0	0	0	0	0	0	0	0	0	0	0	0	0	0	0	0
Otu00311	Bacteria(100)	Chlamydiae(100)	Chlamydiae(100)	Chlamydiales(100)	Chlamydiales_unclassified(100)	Chlamydiales_unclassified(100)	0	2	0	0	0	0	0	0	11	0	0	0	0	1	0	4	8	0	0	0	0	0	0	0	0	0	0	0	0	0	7	76	38	0	12	63	0	412	605	184	23	0	4
Otu00313	Bacteria(100)	Firmicutes(100)	Firmicutes_unclassified(100)	Firmicutes_unclassified(100)	Firmicutes_unclassified(100)	Firmicutes_unclassified(100)	3	0	0	0	0	0	0	0	0	0	0	0	0	0	0	1	0	0	0	0	0	0	0	0	0	0	0	0	0	0	11	39	13	0	1	0	0	565	100	0	20	0	145
Otu00312	Bacteria(100)	Acidobacteria(100)	Acidobacteria_Gp6(100)	Acidobacteria_Gp6_order_incertae_sedis(100)	Acidobacteria_Gp6_family_incertae_sedis(100)	Gp6(100)	2	43	13	0	0	0	0	19	0	0	0	0	1	18	0	2	0	3	0	0	0	1	0	0	0	0	0	0	0	1	0	0	0	0	0	0	0	0	13	0	14	0	0
Otu00315	Bacteria(100)	Actinobacteria(100)	Actinobacteria(100)	Actinomycetales(100)	Actinomycetales_unclassified(100)	Actinomycetales_unclassified(100)	0	0	0	0	0	0	0	5	0	0	0	0	0	0	0	0	0	0	0	0	1	0	0	0	0	0	0	0	0	0	0	0	0	0	0	0	0	0	0	1	0	1483	0
Otu00316	Bacteria(100)	Actinobacteria(100)	Actinobacteria(100)	Actinomycetales(100)	Nocardioidaceae(100)	Nocardioides(100)	0	0	0	0	0	0	0	0	0	0	0	0	0	4	0	0	0	0	0	0	2	0	0	0	0	0	0	0	1	0	0	3	0	0	0	2	0	83	17	0	0	0	86
Otu00294	Bacteria(100)	Actinobacteria(100)	Actinobacteria(100)	Solirubrobacterales(100)	Solirubrobacterales_unclassified(99)	Solirubrobacterales_unclassified(99)	4	68	18	0	0	42	0	43	0	0	0	0	90	4	0	18	7	1	10	0	1	0	0	0	0	0	0	0	0	0	3	0	0	0	0	2	0	14	84	0	43	0	104
Otu00307	Bacteria(100)	Proteobacteria(100)	Alphaproteobacteria(100)	Rhizobiales(100)	Beijerinckiaceae(91)	Beijerinckiaceae_unclassified(69)	3	6	2	0	0	0	0	0	0	0	0	0	0	0	0	0	0	0	0	0	0	0	5	5	0	0	0	0	0	0	0	0	0	0	0	0	0	79	135	96	47	655	55
Otu00310	Bacteria(100)	Proteobacteria(100)	Gammaproteobacteria(100)	Enterobacteriales(100)	Enterobacteriaceae(100)	Enterobacteriaceae_unclassified(100)	0	0	0	0	0	0	0	0	0	0	0	0	0	0	0	0	0	0	0	0	0	0	0	0	0	0	0	0	0	0	0	0	0	0	0	0	0	885	362	128	75	0	0
Otu00318	Bacteria(100)	Bacteroidetes(100)	Bacteroidetes_unclassified(100)	Bacteroidetes_unclassified(100)	Bacteroidetes_unclassified(100)	Bacteroidetes_unclassified(100)	0	0	0	0	0	0	0	0	0	0	0	0	0	0	0	0	0	4	0	0	0	0	0	0	0	0	0	0	0	0	0	0	0	0	0	0	0	0	0	0	1	0	0
Otu00317	Bacteria(100)	Proteobacteria(100)	Alphaproteobacteria(100)	Rhizobiales(99)	Rhizobiales_unclassified(99)	Rhizobiales_unclassified(99)	0	0	0	0	0	0	0	0	0	0	0	0	0	0	0	0	0	0	0	0	0	0	0	0	0	0	0	0	0	0	0	0	0	1	0	0	0	142	596	89	107	0	311
Otu00319	Bacteria(100)	Planctomycetes(100)	Planctomycetacia(100)	Planctomycetales(100)	Planctomycetaceae(100)	Singulisphaera(100)	1	6	0	0	0	0	0	0	0	0	0	0	0	5	0	0	0	0	0	0	13	40	25	0	5	0	0	0	0	0	7	0	0	0	0	4	0	47	399	0	65	0	0
Otu00314	Bacteria(100)	Actinobacteria(100)	Actinobacteria(100)	Solirubrobacterales(85)	Solirubrobacterales_unclassified(84)	Solirubrobacterales_unclassified(84)	0	9	0	0	0	0	0	3	0	0	2	0	0	7	0	7	0	0	0	0	0	4	0	0	0	0	0	0	0	0	0	0	0	0	0	0	0	112	165	0	96	0	102
Otu00320	Bacteria(100)	Firmicutes(100)	Clostridia(100)	Clostridiales(100)	Peptostreptococcaceae(100)	Clostridium_XI(100)	0	65	7	0	0	0	12	2	13	0	0	25	61	0	0	0	0	0	0	0	0	0	0	0	0	0	0	0	0	0	6	0	0	0	0	0	0	0	0	0	20	0	0
Otu00322	Bacteria(100)	Proteobacteria(100)	Alphaproteobacteria(100)	Rhizobiales(100)	Rhizobiaceae(100)	Rhizobium(100)	0	0	0	0	0	0	0	0	0	0	0	0	0	0	0	0	0	0	0	0	0	0	0	0	0	0	0	0	0	0	3	0	0	0	0	5	0	143	20	0	85	0	0
Otu00323	Bacteria(100)	Tenericutes(100)	Mollicutes(100)	Mycoplasmatales(100)	Mycoplasmataceae(100)	Mycoplasma(100)	0	0	0	0	0	0	0	0	0	0	0	0	0	0	0	0	0	0	0	0	0	0	0	0	0	0	0	0	0	0	0	7	0	0	0	3	0	442	0	0	38	0	15
Otu00324	Bacteria(100)	Firmicutes(100)	Clostridia(100)	Clostridiales(100)	Ruminococcaceae(100)	Ruminococcus(99)	0	0	0	0	0	0	0	0	0	0	0	0	0	172	61	0	0	0	0	0	0	0	0	0	0	4	20	0	0	0	0	0	0	0	0	0	0	0	0	0	0	0	0
Otu00325	Bacteria(100)	Bacteria_unclassified(100)	Bacteria_unclassified(100)	Bacteria_unclassified(100)	Bacteria_unclassified(100)	Bacteria_unclassified(100)	0	0	0	0	0	0	0	0	0	0	0	0	0	0	0	0	0	0	0	0	0	0	0	0	0	0	0	0	0	0	0	0	0	0	0	0	0	0	0	0	0	0	0
Otu00326	Bacteria(100)	Actinobacteria(100)	Actinobacteria(100)	Actinomycetales(100)	Actinomycetales_unclassified(100)	Actinomycetales_unclassified(100)	7	263	9	3	7	723	2	0	0	0	0	0	0	0	0	58	32	0	26	0	0	2	1	0	1	0	0	0	0	0	0	5	5	0	0	1	0	0	0	0	0	0	0
Otu00327	Bacteria(100)	Firmicutes(100)	Bacilli(100)	Lactobacillales(100)	Lactobacillaceae(100)	Lactobacillus(100)	0	0	0	0	0	0	0	0	0	0	0	0	0	138	41	0	0	0	0	0	0	0	0	0	0	0	0	0	0	0	0	0	0	0	0	0	0	0	0	0	0	0	0
Otu00328	Bacteria(100)	Firmicutes(100)	Clostridia(100)	Clostridiales(100)	Clostridiales_unclassified(96)	Clostridiales_unclassified(96)	0	0	0	0	0	0	0	0	0	0	0	0	0	0	0	9	2	0	0	0	2	0	0	0	0	0	0	0	0	0	0	0	0	0	0	0	0	1134	50	88	36	0	0
Otu00329	Bacteria(100)	Actinobacteria(100)	Actinobacteria(100)	Actinomycetales(100)	Promicromonosporaceae(100)	Isoptericola(100)	0	0	0	0	0	0	0	0	0	0	0	0	0	0	8	0	0	0	0	0	6	34	0	0	0	0	0	0	0	0	0	0	0	0	0	0	0	0	0	0	0	0	0
Otu00250	Bacteria(100)	Actinobacteria(100)	Actinobacteria(100)	Solirubrobacterales(100)	Conexibacteraceae(90)	Conexibacter(90)	0	15	0	0	2	5	0	24	0	0	0	0	0	0	0	1	4	0	10	0	6	5	0	0	3	0	0	0	0	0	0	0	0	0	0	0	0	0	219	26	72	0	448
Otu00330	Bacteria(100)	Bacteroidetes(100)	Bacteroidetes_unclassified(100)	Bacteroidetes_unclassified(100)	Bacteroidetes_unclassified(100)	Bacteroidetes_unclassified(100)	0	0	0	0	0	0	0	0	0	0	0	0	0	0	1	0	0	0	0	0	0	0	0	0	0	0	0	0	0	0	0	0	0	0	0	0	0	0	1	0	0	0	0
Otu00331	Bacteria(100)	Actinobacteria(100)	Actinobacteria(100)	Actinomycetales(100)	Thermomonosporaceae(93)	Actinoallomurus(74)	0	0	0	1	0	0	0	48	0	0	0	0	0	0	0	0	0	8	0	0	21	44	12	0	0	0	0	0	0	0	0	0	0	0	0	0	60	0	87	0	48	166	0
Otu00333	Bacteria(100)	SR1(100)	SR1_class_incertae_sedis(100)	SR1_order_incertae_sedis(100)	SR1_family_incertae_sedis(100)	SR1_genus_incertae_sedis(100)	0	0	0	0	0	0	0	0	315	0	0	0	0	0	3	0	0	0	2	28	0	0	0	0	3	0	0	16	0	0	0	0	0	0	0	1	0	0	14	0	0	0	0
Otu00332	Bacteria(100)	Bacteria_unclassified(100)	Bacteria_unclassified(100)	Bacteria_unclassified(100)	Bacteria_unclassified(100)	Bacteria_unclassified(100)	0	0	0	0	0	0	0	0	0	0	0	0	0	0	0	0	0	0	4	0	0	0	0	0	0	0	0	0	0	0	0	0	0	0	0	0	0	12	149	0	159	470	29
Otu00334	Bacteria(100)	Verrucomicrobia(100)	Spartobacteria(100)	Spartobacteria_order_incertae_sedis(100)	Spartobacteria_family_incertae_sedis(100)	Spartobacteria_genera_incertae_sedis(100)	0	0	0	0	0	0	0	0	0	0	0	0	0	0	0	0	0	0	0	0	0	0	0	0	2	0	0	0	0	0	0	0	0	0	0	0	0	0	0	0	0	0	0
Otu00335	Bacteria(100)	Actinobacteria(100)	Actinobacteria(100)	Actinomycetales(100)	Tsukamurellaceae(100)	Tsukamurella(100)	0	0	0	0	0	0	0	4	0	0	0	0	0	0	45	1	0	0	0	0	0	2	0	0	0	0	0	0	0	0	0	6	0	0	0	0	0	0	0	0	0	0	0
Otu00336	Bacteria(100)	Bacteria_unclassified(100)	Bacteria_unclassified(100)	Bacteria_unclassified(100)	Bacteria_unclassified(100)	Bacteria_unclassified(100)	0	0	0	0	0	0	0	0	0	0	0	0	0	0	0	0	0	0	0	2	0	0	0	0	0	0	0	0	0	0	0	0	0	0	0	0	0	58	698	63	130	0	67
Otu00339	Bacteria(100)	Firmicutes(100)	Clostridia(100)	Clostridiales(100)	Clostridiales_unclassified(100)	Clostridiales_unclassified(100)	0	0	0	0	0	0	0	0	0	0	0	0	0	0	0	0	0	0	0	0	0	0	0	0	0	0	0	0	0	4	0	0	0	0	0	0	0	0	0	0	0	0	2
Otu00340	Bacteria(100)	Firmicutes(100)	Firmicutes_unclassified(100)	Firmicutes_unclassified(100)	Firmicutes_unclassified(100)	Firmicutes_unclassified(100)	0	0	0	0	0	0	0	0	0	0	0	0	0	0	0	0	2	0	0	0	0	0	0	0	0	0	0	0	0	0	0	0	0	0	0	0	0	442	61	30	247	16	408
Otu00341	Bacteria(100)	Actinobacteria(100)	Actinobacteria(100)	Actinomycetales(100)	Acidothermaceae(98)	Acidothermus(98)	0	0	0	0	0	18	0	0	300	0	0	0	0	0	0	0	0	0	0	0	0	0	0	0	0	0	0	0	0	0	0	0	0	0	0	0	0	0	0	0	0	973	14
Otu00338	Bacteria(100)	Bacteroidetes(100)	Flavobacteria(100)	Flavobacteriales(100)	Flavobacteriaceae(100)	Flavobacterium(100)	0	0	0	0	0	0	0	0	5	0	0	0	0	0	1	0	0	4	5	0	0	0	0	3	0	0	62	0	0	0	0	0	0	0	0	0	0	0	0	0	0	0	25
Otu00342	Bacteria(100)	Actinobacteria(100)	Actinobacteria(100)	Actinomycetales(100)	Nocardioidaceae(100)	Nocardioides(99)	0	6	0	0	0	2	0	0	0	0	0	0	0	0	0	3	3	0	0	3	2	8	2	0	5	0	0	0	0	0	3	2	0	0	0	0	0	168	134	0	2	35	178
Otu00343	Bacteria(100)	Firmicutes(100)	Firmicutes_unclassified(100)	Firmicutes_unclassified(100)	Firmicutes_unclassified(100)	Firmicutes_unclassified(100)	0	0	0	0	0	0	0	0	0	0	0	0	0	0	0	0	0	0	0	0	0	0	0	0	0	0	0	0	0	0	0	0	0	0	0	0	0	0	1	0	0	0	0
Otu00344	Bacteria(100)	Bacteroidetes(100)	Bacteroidia(100)	Bacteroidales(100)	Prevotellaceae(100)	Prevotella(100)	0	0	0	0	0	0	0	0	0	0	0	0	0	8	0	0	0	0	0	0	0	0	0	0	0	0	0	0	0	0	0	0	0	0	0	0	0	0	0	0	0	0	0
Otu00345	Bacteria(100)	Bacteroidetes(100)	Sphingobacteria(100)	Sphingobacteriales(100)	Sphingobacteriales_unclassified(100)	Sphingobacteriales_unclassified(100)	0	0	0	0	0	0	0	0	0	0	0	0	0	0	84	1	10	1	0	0	0	0	0	0	3	3	0	0	0	2	0	0	0	0	0	0	0	0	0	0	0	0	0
Otu00346	Bacteria(100)	Proteobacteria(100)	Betaproteobacteria(100)	Betaproteobacteria_unclassified(74)	Betaproteobacteria_unclassified(74)	Betaproteobacteria_unclassified(74)	0	0	2	0	0	0	0	0	0	0	0	0	0	0	0	3	0	3	0	0	0	0	0	5	0	0	15	0	0	0	0	0	0	0	0	0	0	0	0	0	0	0	0
Otu00347	Bacteria(100)	Proteobacteria(100)	Alphaproteobacteria(100)	Rhodospirillales(100)	Acetobacteraceae(100)	Acetobacteraceae_unclassified(84)	0	1	0	0	0	0	0	0	0	0	0	0	0	0	0	0	0	0	0	0	0	0	0	0	0	0	0	0	0	0	0	0	0	0	0	0	0	121	712	64	53	51	52
Otu00348	Bacteria(100)	Actinobacteria(100)	Actinobacteria(100)	Actinomycetales(100)	Nocardiaceae(100)	Williamsia(100)	0	0	0	0	0	0	0	0	0	0	0	0	0	0	0	5	0	0	0	0	0	0	0	0	0	0	0	0	0	0	0	0	0	0	0	11	0	236	258	0	137	0	355
Otu00349	Bacteria(100)	Verrucomicrobia(100)	Subdivision3(100)	Subdivision3_order_incertae_sedis(100)	Subdivision3_family_incertae_sedis(100)	3_genus_incertae_sedis(100)	0	0	0	0	0	0	0	0	0	0	0	0	0	0	0	0	0	0	0	0	0	0	0	0	1	0	0	0	0	0	0	0	0	0	0	0	0	0	0	0	0	0	0
Otu00350	Bacteria(100)	Bacteria_unclassified(100)	Bacteria_unclassified(100)	Bacteria_unclassified(100)	Bacteria_unclassified(100)	Bacteria_unclassified(100)	0	0	0	0	0	0	0	0	0	0	0	0	0	0	0	0	0	0	0	0	0	0	0	0	0	0	0	0	0	0	0	0	0	0	0	0	0	0	52	0	765	0	0
Otu00351	Bacteria(100)	Verrucomicrobia(100)	Spartobacteria(78)	Spartobacteria_order_incertae_sedis(78)	Spartobacteria_family_incertae_sedis(78)	Spartobacteria_genera_incertae_sedis(78)	0	0	1	0	1	0	0	0	0	0	0	0	0	0	0	0	0	0	0	0	0	0	0	0	0	0	0	0	0	0	0	0	0	0	0	0	0	32	0	0	76	0	505
Otu00352	Bacteria(100)	Bacteria_unclassified(100)	Bacteria_unclassified(100)	Bacteria_unclassified(100)	Bacteria_unclassified(100)	Bacteria_unclassified(100)	0	0	0	0	0	0	0	0	0	0	0	0	0	0	0	0	0	0	0	25	0	0	0	0	0	0	0	0	0	0	0	0	0	0	0	0	0	0	0	0	0	0	0
Otu00353	Bacteria(100)	Proteobacteria(100)	Alphaproteobacteria(100)	Rhodospirillales(100)	Acetobacteraceae(100)	Gluconobacter(99)	0	0	0	0	0	0	0	0	0	0	0	0	0	0	0	0	0	0	0	0	0	0	0	0	0	0	0	0	0	0	33	0	0	0	0	0	0	410	1	0	346	0	158
Otu00354	Bacteria(100)	Bacteria_unclassified(100)	Bacteria_unclassified(100)	Bacteria_unclassified(100)	Bacteria_unclassified(100)	Bacteria_unclassified(100)	0	0	0	0	0	0	0	0	0	0	0	0	0	0	0	0	0	0	0	0	0	0	0	0	0	0	0	0	0	0	0	0	0	0	0	0	0	0	0	0	0	0	0
Otu00337	Bacteria(100)	Actinobacteria(100)	Actinobacteria(100)	Actinomycetales(100)	Nocardioidaceae(100)	Nocardioidaceae_unclassified(55)	0	13	2	0	0	0	0	3	0	0	0	0	0	0	0	4	12	0	4	0	6	4	0	0	18	0	0	0	0	0	9	10	2	0	0	22	0	21	3	119	28	0	54
Otu00355	Bacteria(100)	Verrucomicrobia(100)	Spartobacteria(100)	Spartobacteria_order_incertae_sedis(100)	Spartobacteria_family_incertae_sedis(100)	Spartobacteria_genera_incertae_sedis(100)	0	0	0	0	0	0	0	0	0	0	0	0	0	0	0	0	0	0	0	0	0	4	0	0	3	0	0	0	0	0	0	0	0	0	0	0	0	100	0	0	34	0	0
Otu00357	Bacteria(100)	Firmicutes(100)	Firmicutes_unclassified(100)	Firmicutes_unclassified(100)	Firmicutes_unclassified(100)	Firmicutes_unclassified(100)	0	0	0	0	0	0	0	0	0	0	0	0	0	0	0	0	0	0	0	0	0	0	0	0	0	0	0	0	0	0	0	0	0	0	0	0	0	0	0	1	0	0	0
Otu00321	Bacteria(100)	Proteobacteria(100)	Gammaproteobacteria(100)	Pseudomonadales(100)	Pseudomonadaceae(100)	Pseudomonas(99)	0	0	0	0	0	0	0	0	0	363	0	0	0	0	0	0	0	0	0	0	0	0	0	0	2	0	0	0	0	0	0	3	0	0	0	3	0	69	0	0	52	0	0
Otu00358	Bacteria(100)	Bacteroidetes(100)	Sphingobacteria(100)	Sphingobacteriales(100)	Chitinophagaceae(100)	Chitinophagaceae_unclassified(100)	3	0	0	0	0	0	0	0	0	0	0	0	0	0	0	0	0	4	0	0	0	0	0	3	75	0	0	0	0	0	0	0	0	0	0	0	0	15	0	0	0	0	10
Otu00360	Bacteria(100)	Proteobacteria(100)	Deltaproteobacteria(100)	Desulfovibrionales(100)	Desulfovibrionaceae(100)	Desulfovibrionaceae_unclassified(100)	0	0	0	0	0	0	0	0	0	0	0	0	0	0	0	0	0	0	0	0	0	0	0	0	0	0	0	0	0	0	0	0	0	0	0	0	0	1071	27	0	0	165	0
Otu00361	Bacteria(100)	Bacteroidetes(100)	Sphingobacteria(100)	Sphingobacteriales(100)	Cytophagaceae(100)	Cytophagaceae_unclassified(100)	0	2	3	0	0	30	0	0	0	0	0	41	1	1	0	0	0	0	0	0	0	0	0	0	0	0	0	0	0	0	0	0	0	0	0	6	2	0	1	0	0	1082	33
Otu00362	Bacteria(100)	Bacteria_unclassified(100)	Bacteria_unclassified(100)	Bacteria_unclassified(100)	Bacteria_unclassified(100)	Bacteria_unclassified(100)	0	0	0	0	0	0	0	0	0	0	0	0	0	0	0	1	0	0	0	0	0	0	0	0	0	0	0	0	0	0	0	0	0	0	0	0	0	301	276	0	388	0	44
Otu00356	Bacteria(100)	Actinobacteria(100)	Actinobacteria(100)	Actinomycetales(100)	Actinomycetales_unclassified(80)	Actinomycetales_unclassified(80)	0	0	0	0	0	0	0	3	0	0	0	0	0	2	0	0	0	0	0	0	0	1	2	0	0	0	0	1	0	0	0	10	0	0	0	10	0	23	0	0	36	0	2
Otu00363	Bacteria(100)	Proteobacteria(100)	Alphaproteobacteria(100)	Rhizobiales(100)	Methylobacteriaceae(97)	Methylobacteriaceae_unclassified(95)	4	0	0	0	0	1	0	0	0	0	0	0	0	0	0	0	0	5	0	0	1	0	0	0	0	0	0	0	0	0	0	0	0	0	0	3	0	0	178	0	202	0	58
Otu00364	Bacteria(100)	Firmicutes(100)	Firmicutes_unclassified(100)	Firmicutes_unclassified(100)	Firmicutes_unclassified(100)	Firmicutes_unclassified(100)	0	0	0	0	0	0	0	0	0	0	0	0	0	0	0	0	0	0	0	0	0	0	0	0	0	0	0	0	0	0	0	0	0	0	0	0	0	0	0	0	0	0	1
Otu00365	Bacteria(100)	Proteobacteria(100)	Alphaproteobacteria(100)	Alphaproteobacteria_unclassified(100)	Alphaproteobacteria_unclassified(100)	Alphaproteobacteria_unclassified(100)	21	0	8	0	4	0	0	0	0	0	0	0	0	0	0	0	0	0	0	0	0	0	0	0	0	0	0	0	0	0	0	0	0	0	0	0	0	994	1	0	142	0	0
Otu00366	Bacteria(100)	Firmicutes(100)	Clostridia(100)	Clostridiales(100)	Lachnospiraceae(100)	Clostridium_XlVb(100)	0	0	0	0	0	0	0	0	0	0	0	0	0	0	0	0	0	0	0	0	0	0	0	0	0	0	0	0	0	0	0	0	0	0	0	0	0	0	0	0	0	0	0
Otu00367	Bacteria(100)	Firmicutes(100)	Clostridia(100)	Clostridiales(100)	Lachnospiraceae(100)	Lachnospiraceae_unclassified(100)	0	0	0	0	0	0	0	0	0	0	0	0	0	0	16	0	0	0	0	0	0	0	0	0	0	0	0	0	0	0	0	0	0	0	0	0	0	0	1	0	0	0	0
Otu00368	Bacteria(100)	Bacteroidetes(100)	Bacteroidia(100)	Bacteroidales(100)	Bacteroidaceae(100)	Bacteroides(100)	0	0	0	0	0	0	0	0	0	0	0	0	0	94	0	2	0	0	0	0	0	3	0	0	0	0	23	0	0	0	0	0	0	0	0	0	0	0	0	0	0	0	0
Otu00359	Bacteria(100)	Actinobacteria(100)	Actinobacteria(100)	Actinomycetales(100)	Nocardioidaceae(100)	Aeromicrobium(100)	1	12	6	0	0	0	3	2	0	0	0	0	0	0	0	1	2	1	0	2	2	7	0	0	0	1	1	0	0	0	0	6	3	0	0	5	0	20	1	0	1	0	17
Otu00369	Bacteria(100)	Actinobacteria(100)	Actinobacteria(100)	Actinomycetales(100)	Actinomycetales_unclassified(100)	Actinomycetales_unclassified(100)	0	0	0	2	0	17	0	0	0	0	0	0	0	0	0	1	0	0	0	0	1	1	0	0	3	0	0	0	0	0	0	0	0	0	0	0	0	0	171	0	99	0	234
Otu00371	Bacteria(100)	Proteobacteria(100)	Alphaproteobacteria(100)	Alphaproteobacteria_unclassified(100)	Alphaproteobacteria_unclassified(100)	Alphaproteobacteria_unclassified(100)	0	0	0	0	0	0	0	0	0	0	0	0	0	0	0	0	0	0	0	0	0	0	0	0	0	0	0	0	0	0	0	0	0	0	0	0	0	0	0	0	0	0	0
Otu00372	Bacteria(100)	Firmicutes(100)	Clostridia(100)	Clostridiales(100)	Lachnospiraceae(100)	Lachnospiraceae_unclassified(100)	0	0	0	0	0	0	0	0	0	0	0	0	0	0	0	0	0	0	0	0	0	0	0	0	0	0	0	0	0	0	0	0	0	0	0	0	0	153	406	0	357	4	31
Otu00373	Bacteria(100)	Actinobacteria(100)	Actinobacteria(100)	Acidimicrobiales(89)	Acidimicrobiales_unclassified(89)	Acidimicrobiales_unclassified(89)	0	0	0	0	0	0	0	0	0	0	0	0	0	3	0	0	0	0	0	2	3	0	0	2	0	0	0	0	0	3	0	0	0	0	0	0	0	49	167	1	9	284	141
Otu00374	Bacteria(100)	Bacteria_unclassified(100)	Bacteria_unclassified(100)	Bacteria_unclassified(100)	Bacteria_unclassified(100)	Bacteria_unclassified(100)	0	0	0	0	0	0	0	0	0	0	0	0	0	0	17	0	0	0	0	0	0	0	0	0	0	1	65	0	0	0	0	0	0	0	0	0	0	0	0	0	0	0	0
Otu00375	Bacteria(100)	Proteobacteria(100)	Betaproteobacteria(100)	Betaproteobacteria_unclassified(100)	Betaproteobacteria_unclassified(100)	Betaproteobacteria_unclassified(100)	0	0	0	0	0	0	0	0	0	0	0	0	0	0	0	0	0	0	0	0	0	0	0	0	0	0	0	0	0	0	0	0	0	0	0	0	0	0	0	0	5	0	0
Otu00376	Bacteria(100)	Planctomycetes(100)	Planctomycetacia(100)	Planctomycetales(100)	Planctomycetaceae(100)	Planctomycetaceae_unclassified(100)	0	0	0	0	0	0	0	0	0	0	0	0	0	0	0	0	0	0	0	0	2	24	0	0	3	0	0	0	0	0	0	0	0	0	0	0	0	0	0	0	23	0	132
Otu00370	Bacteria(100)	Planctomycetes(100)	Planctomycetacia(100)	Planctomycetales(100)	Planctomycetaceae(100)	Singulisphaera(100)	5	0	0	0	0	0	0	10	0	0	0	0	0	11	0	8	0	0	0	26	57	104	44	0	13	0	0	0	0	0	0	0	0	0	0	0	0	2	50	0	105	0	0
Otu00377	Bacteria(100)	Actinobacteria(100)	Actinobacteria(100)	Solirubrobacterales(100)	Conexibacteraceae(99)	Conexibacter(99)	0	0	0	0	0	0	0	0	0	0	0	0	0	0	0	3	2	0	0	2	3	1	2	3	4	0	0	0	0	0	0	1	0	0	0	0	0	5	60	0	9	1008	2
Otu00378	Bacteria(100)	Planctomycetes(100)	Planctomycetacia(100)	Planctomycetales(100)	Planctomycetaceae(100)	Planctomycetaceae_unclassified(100)	0	0	0	0	0	0	0	0	0	0	0	0	0	0	0	0	0	0	0	0	0	0	0	0	0	0	0	0	0	0	3	0	0	0	0	0	0	14	0	0	14	0	0
Otu00379	Bacteria(100)	Firmicutes(100)	Negativicutes(91)	Selenomonadales(91)	Veillonellaceae(91)	Veillonellaceae_unclassified(91)	0	0	0	0	0	0	0	0	0	0	0	0	0	0	13	0	6	0	0	0	0	0	0	0	0	0	0	0	0	0	0	0	0	0	0	0	0	0	0	0	0	0	0
Otu00380	Bacteria(100)	Proteobacteria(100)	Betaproteobacteria(100)	Burkholderiales(100)	Burkholderiales_unclassified(79)	Burkholderiales_unclassified(79)	0	0	0	0	0	0	4	0	119	0	0	0	0	33	5	0	0	0	0	0	0	0	0	0	0	1	0	0	0	0	0	0	0	0	0	0	0	0	0	0	6	0	0
Otu00382	Bacteria(100)	Planctomycetes(100)	Planctomycetacia(100)	Planctomycetales(100)	Planctomycetaceae(100)	Singulisphaera(100)	0	0	0	0	0	0	0	0	0	0	0	0	0	0	0	0	0	0	0	0	0	0	0	0	0	0	0	0	0	0	0	0	0	0	0	0	0	107	39	0	0	110	0
Otu00383	Bacteria(100)	Bacteroidetes(100)	Sphingobacteria(100)	Sphingobacteriales(100)	Chitinophagaceae(100)	Ferruginibacter(53)	0	0	0	0	0	0	0	0	0	0	0	0	0	14	0	0	0	0	0	0	0	0	3	0	0	0	1	0	0	0	0	0	0	0	0	0	0	102	24	0	26	0	0
Otu00381	Bacteria(100)	Proteobacteria(100)	Alphaproteobacteria(100)	Rhizobiales(100)	Rhizobiales_unclassified(100)	Rhizobiales_unclassified(100)	1	0	0	0	0	0	0	0	0	0	0	0	0	0	0	0	0	2	0	0	0	0	0	0	0	0	0	0	0	0	0	0	0	0	0	1	0	151	164	0	130	0	0
Otu00384	Bacteria(100)	Bacteroidetes(100)	Bacteroidetes_unclassified(100)	Bacteroidetes_unclassified(100)	Bacteroidetes_unclassified(100)	Bacteroidetes_unclassified(100)	0	0	0	0	0	0	0	0	0	0	0	0	32	0	0	0	0	0	0	0	0	0	0	0	0	0	0	0	0	0	0	0	0	0	0	0	0	0	0	0	0	0	0
Otu00385	Bacteria(100)	Proteobacteria(100)	Proteobacteria_unclassified(100)	Proteobacteria_unclassified(100)	Proteobacteria_unclassified(100)	Proteobacteria_unclassified(100)	0	0	0	0	0	0	0	0	0	0	0	0	0	0	0	0	0	0	0	0	0	0	0	0	0	0	0	0	0	0	0	0	0	0	0	0	0	1146	0	0	15	0	0
Otu00386	Bacteria(100)	Bacteroidetes(100)	Sphingobacteria(100)	Sphingobacteriales(100)	Chitinophagaceae(100)	Chitinophagaceae_unclassified(100)	0	5	0	0	0	0	0	0	0	0	0	0	0	2	0	0	0	0	0	0	0	0	0	0	0	0	0	0	0	0	0	0	0	0	0	0	0	0	0	0	31	0	0
Otu00387	Bacteria(100)	Bacteroidetes(100)	Bacteroidetes_unclassified(100)	Bacteroidetes_unclassified(100)	Bacteroidetes_unclassified(100)	Bacteroidetes_unclassified(100)	0	0	0	0	0	0	0	0	0	0	0	0	0	0	0	0	0	0	0	0	0	0	0	0	0	0	0	0	0	0	0	0	0	0	0	0	0	0	0	0	0	1152	0
Otu00389	Bacteria(100)	Bacteroidetes(100)	Bacteroidia(100)	Bacteroidales(100)	Bacteroidaceae(100)	Bacteroides(100)	0	0	0	0	0	0	0	0	0	0	0	0	0	0	0	0	0	0	0	0	0	0	0	0	0	0	0	0	0	0	0	0	0	0	0	0	0	0	0	0	0	0	0
Otu00391	Bacteria(100)	Bacteria_unclassified(100)	Bacteria_unclassified(100)	Bacteria_unclassified(100)	Bacteria_unclassified(100)	Bacteria_unclassified(100)	0	0	0	0	0	0	0	0	0	0	0	0	0	0	0	0	0	0	0	0	0	0	0	0	0	0	0	0	0	0	0	0	0	0	0	0	0	0	0	0	0	0	0
Otu00390	Bacteria(100)	Proteobacteria(100)	Alphaproteobacteria(100)	Caulobacterales(100)	Caulobacteraceae(100)	Brevundimonas(100)	0	0	0	0	0	0	0	0	0	0	0	0	0	0	0	0	0	0	0	0	0	0	0	7	0	0	0	0	0	0	0	0	0	0	0	13	0	0	12	0	6	0	35
Otu00393	Bacteria(100)	Proteobacteria(100)	Betaproteobacteria(100)	Burkholderiales(100)	Burkholderiales_unclassified(100)	Burkholderiales_unclassified(100)	0	1	0	0	0	0	0	0	0	0	0	0	0	0	0	0	2	0	1	0	0	0	2	0	2	1	0	0	0	0	0	0	0	0	0	0	0	0	0	0	0	0	0
Otu00394	Bacteria(100)	Proteobacteria(100)	Gammaproteobacteria(100)	Pseudomonadales(100)	Moraxellaceae(100)	Psychrobacter(100)	3	0	0	0	0	0	0	0	0	0	0	0	0	0	151	0	0	4	0	8	0	0	2	0	0	2	94	0	0	0	0	0	0	0	0	0	0	0	0	0	0	0	0
Otu00395	Bacteria(100)	Proteobacteria(100)	Betaproteobacteria(100)	Burkholderiales(100)	Comamonadaceae(100)	Comamonadaceae_unclassified(100)	2	0	0	0	0	0	0	0	0	0	0	0	0	0	0	0	0	1	3	0	0	0	1	0	2	4	73	0	0	0	3	0	0	0	0	0	0	0	0	0	23	0	0
Otu00396	Bacteria(100)	Bacteria_unclassified(100)	Bacteria_unclassified(100)	Bacteria_unclassified(100)	Bacteria_unclassified(100)	Bacteria_unclassified(100)	0	0	0	0	0	0	0	0	0	0	0	0	0	0	0	0	0	0	0	0	0	0	0	0	0	0	0	0	0	0	0	0	0	0	0	0	0	0	0	1	0	0	0
Otu00397	Bacteria(100)	Firmicutes(100)	Clostridia(100)	Clostridiales(100)	Lachnospiraceae(100)	Lachnospiraceae_unclassified(100)	0	0	0	0	0	0	0	0	0	0	0	0	0	0	0	0	0	0	0	0	0	0	0	0	0	0	0	0	0	0	0	0	0	0	0	0	0	420	445	105	29	0	121
Otu00398	Bacteria(100)	Actinobacteria(100)	Actinobacteria(100)	Coriobacteriales(100)	Coriobacteriaceae(100)	Coriobacteriaceae_unclassified(100)	0	6	0	0	2	0	0	0	0	0	0	0	0	0	0	6	0	0	0	0	1	7	0	0	5	0	0	0	0	0	0	0	0	0	0	0	0	0	0	0	0	0	0
Otu00399	Bacteria(100)	Firmicutes(100)	Clostridia(100)	Clostridiales(100)	Ruminococcaceae(100)	Ruminococcaceae_unclassified(100)	0	0	0	0	0	0	0	0	0	0	0	0	0	0	0	0	0	0	0	0	0	0	0	0	0	0	0	0	0	0	0	0	0	0	0	0	11	0	0	0	0	864	0
Otu00401	Bacteria(100)	Actinobacteria(100)	Actinobacteria(100)	Solirubrobacterales(100)	Conexibacteraceae(100)	Conexibacter(100)	0	10	0	0	1	17	1	5	0	0	0	0	0	0	0	4	2	1	0	1	0	1	1	0	2	0	0	0	0	0	0	0	0	0	0	0	0	2	152	0	32	0	222
Otu00402	Bacteria(100)	Firmicutes(100)	Clostridia(100)	Clostridiales(100)	Lachnospiraceae(100)	Blautia(100)	0	0	0	0	0	0	0	0	0	0	0	0	0	249	10	0	0	0	0	2	0	0	0	6	6	0	76	0	0	0	0	0	0	0	0	0	0	0	0	0	0	0	0
Otu00403	Bacteria(100)	Proteobacteria(100)	Betaproteobacteria(100)	Betaproteobacteria_unclassified(100)	Betaproteobacteria_unclassified(100)	Betaproteobacteria_unclassified(100)	0	0	0	0	0	0	0	0	0	0	0	0	0	0	0	0	0	0	0	0	0	0	0	5	0	2	84	0	0	0	0	0	0	0	0	0	0	0	0	0	0	0	0
Otu00405	Bacteria(100)	Firmicutes(100)	Clostridia(100)	Clostridiales(100)	Clostridiales_unclassified(100)	Clostridiales_unclassified(100)	0	0	0	0	0	0	0	0	0	0	0	0	0	0	0	0	0	0	0	0	0	0	0	0	0	0	0	0	0	0	0	0	0	0	0	0	0	555	0	0	498	0	40
Otu00400	Bacteria(100)	Firmicutes(100)	Bacilli(100)	Bacillales(100)	Bacillales_unclassified(83)	Bacillales_unclassified(83)	0	37	0	0	0	0	0	10	565	1	0	39	0	0	0	5	7	3	0	0	0	0	0	0	0	0	0	0	0	0	0	0	0	0	0	0	0	0	0	0	0	0	0
Otu00408	Bacteria(100)	Firmicutes(100)	Firmicutes_unclassified(100)	Firmicutes_unclassified(100)	Firmicutes_unclassified(100)	Firmicutes_unclassified(100)	0	0	0	0	0	0	0	529	34	0	6	14	445	0	0	0	0	0	0	0	0	0	0	0	0	0	0	0	0	0	0	0	0	0	0	0	0	0	0	0	0	0	0
Otu00409	Bacteria(100)	Actinobacteria(100)	Actinobacteria(100)	Bifidobacteriales(100)	Bifidobacteriaceae(100)	Bifidobacterium(100)	0	0	0	0	0	0	0	0	0	0	0	0	0	0	3	0	0	5	0	0	0	0	0	3	1	0	0	0	0	0	0	0	0	0	0	0	0	0	0	0	0	0	0
Otu00411	Bacteria(100)	Proteobacteria(100)	Gammaproteobacteria(100)	Pseudomonadales(100)	Moraxellaceae(100)	Moraxellaceae_unclassified(99)	0	0	0	0	0	0	0	0	2	0	0	0	0	500	0	0	0	0	0	0	0	0	0	0	0	0	0	0	0	0	0	0	0	0	0	0	0	0	0	0	0	0	9
Otu00412	Bacteria(100)	Firmicutes(100)	Bacilli(100)	Bacillales(100)	Paenibacillaceae_1(100)	Brevibacillus(100)	0	0	0	0	0	0	0	0	0	0	0	0	0	0	56	0	0	0	1	4	0	0	0	0	0	0	1	0	0	0	0	0	0	0	0	0	0	0	0	0	0	0	0
Otu00413	Bacteria(100)	Bacteria_unclassified(100)	Bacteria_unclassified(100)	Bacteria_unclassified(100)	Bacteria_unclassified(100)	Bacteria_unclassified(100)	0	0	0	0	0	0	0	0	0	0	0	0	40	0	0	0	0	0	0	9	0	0	0	0	0	0	0	0	0	0	0	0	0	0	0	0	0	0	0	0	0	0	0
Otu00415	Bacteria(100)	Planctomycetes(100)	Planctomycetacia(100)	Planctomycetales(100)	Planctomycetaceae(100)	Planctomycetaceae_unclassified(100)	0	0	0	0	0	0	0	0	0	0	0	0	0	3	0	0	0	0	0	0	0	0	0	0	0	0	0	0	0	0	0	0	0	0	0	0	0	107	2	0	33	0	0
Otu00392	Bacteria(100)	Actinobacteria(100)	Actinobacteria(100)	Actinomycetales(100)	Nocardiaceae(100)	Smaragdicoccus(100)	0	11	0	0	0	75	0	0	0	0	0	0	0	0	0	0	0	0	0	0	0	0	0	0	0	0	0	0	0	0	0	0	0	0	0	0	0	142	44	0	214	0	314
Otu00416	Bacteria(100)	Bacteroidetes(100)	Flavobacteria(100)	Flavobacteriales(100)	Flavobacteriaceae(100)	Flavobacterium(100)	0	0	0	0	0	0	0	0	0	0	0	0	0	0	0	0	0	0	0	0	0	0	0	0	2	0	0	0	0	0	0	0	0	0	0	0	0	0	1	0	0	0	0
Otu00419	Bacteria(100)	Actinobacteria(100)	Actinobacteria(100)	Actinomycetales(100)	Actinomycetales_unclassified(100)	Actinomycetales_unclassified(100)	0	0	0	0	0	0	0	0	0	0	0	0	0	0	0	0	1	4	0	0	1	6	0	0	10	0	0	0	0	0	0	4	0	0	0	0	0	37	249	0	55	0	222
Otu00418	Bacteria(100)	Actinobacteria(100)	Actinobacteria(100)	Actinomycetales(100)	Micromonosporaceae(100)	Micromonosporaceae_unclassified(100)	0	2	0	1	0	0	0	0	0	0	0	0	0	0	0	4	2	0	0	0	0	0	0	0	0	0	0	0	0	0	0	0	0	0	0	0	0	37	203	0	27	0	42
Otu00421	Bacteria(100)	Proteobacteria(100)	Deltaproteobacteria(100)	Desulfuromonadales(100)	Geobacteraceae(100)	Geobacter(100)	0	0	0	0	0	0	0	0	0	0	0	0	0	0	0	0	0	0	0	0	0	0	0	0	0	0	0	0	0	0	0	0	0	0	0	0	0	0	0	0	2	0	0
Otu00420	Bacteria(100)	Planctomycetes(100)	Planctomycetacia(100)	Planctomycetales(100)	Planctomycetaceae(100)	Singulisphaera(100)	4	0	0	0	6	0	0	0	0	0	0	0	0	0	0	0	0	0	0	0	0	0	12	0	0	0	0	0	0	0	0	0	0	0	0	0	0	481	102	0	207	0	0
Otu00422	Bacteria(100)	Actinobacteria(100)	Actinobacteria(100)	Solirubrobacterales(100)	Solirubrobacterales_unclassified(94)	Solirubrobacterales_unclassified(94)	0	0	0	0	0	0	0	0	0	0	0	0	0	0	0	0	0	0	0	0	0	0	0	0	0	0	0	0	0	0	0	0	0	0	0	0	0	57	69	0	39	0	109
Otu00424	Bacteria(100)	Proteobacteria(100)	Alphaproteobacteria(100)	Alphaproteobacteria_unclassified(100)	Alphaproteobacteria_unclassified(100)	Alphaproteobacteria_unclassified(100)	0	0	0	0	0	0	0	0	0	0	0	0	0	0	0	0	0	0	0	0	0	0	11	0	0	0	0	0	0	0	0	0	0	0	0	0	0	0	5	0	1	1044	0
Otu00414	Bacteria(100)	Bacteroidetes(100)	Flavobacteria(100)	Flavobacteriales(100)	Flavobacteriaceae(100)	Cloacibacterium(100)	0	1	0	0	0	0	1	0	0	0	0	0	0	64	0	0	1	0	0	0	0	0	0	0	0	0	0	0	0	0	0	0	0	0	0	0	0	0	0	0	4	0	0
Otu00425	Bacteria(100)	Firmicutes(100)	Bacilli(100)	Bacillales(100)	Bacillales_unclassified(100)	Bacillales_unclassified(100)	0	0	0	0	0	0	0	0	0	0	0	0	0	0	0	0	0	0	0	0	0	0	0	0	0	0	0	0	0	0	0	0	0	0	0	0	0	0	0	0	0	0	0
Otu00426	Bacteria(100)	Proteobacteria(100)	Alphaproteobacteria(100)	Rhizobiales(100)	Rhizobiales_unclassified(100)	Rhizobiales_unclassified(100)	0	0	0	0	0	0	0	0	0	0	0	0	0	0	0	0	0	0	0	0	0	0	0	0	0	0	0	0	0	0	0	0	0	0	0	0	0	74	78	0	14	276	0
Otu00427	Bacteria(100)	Actinobacteria(100)	Actinobacteria(100)	Actinomycetales(100)	Nocardioidaceae(100)	Marmoricola(96)	0	8	4	0	0	0	5	12	0	16	1	0	0	0	12	20	4	2	3	0	1	2	0	0	1	0	0	0	0	0	1	4	0	0	0	4	30	108	105	1	84	0	11
Otu00428	Bacteria(100)	Proteobacteria(100)	Betaproteobacteria(100)	Betaproteobacteria_unclassified(96)	Betaproteobacteria_unclassified(96)	Betaproteobacteria_unclassified(96)	0	1	0	0	0	0	0	0	0	0	0	0	0	0	0	0	0	0	0	0	0	0	0	0	0	0	0	0	0	0	0	0	0	0	0	0	0	39	2	0	10	0	0
Otu00404	Bacteria(100)	Actinobacteria(100)	Actinobacteria(100)	Actinomycetales(100)	Mycobacteriaceae(96)	Mycobacterium(96)	0	21	4	0	4	26	0	29	0	0	2	0	1	1	0	23	3	0	3	4	21	43	7	2	17	0	0	0	0	0	0	8	10	0	0	0	0	35	56	0	18	0	149
Otu00429	Bacteria(100)	Bacteria_unclassified(100)	Bacteria_unclassified(100)	Bacteria_unclassified(100)	Bacteria_unclassified(100)	Bacteria_unclassified(100)	0	0	0	0	0	0	0	0	0	0	0	0	0	0	0	0	0	0	0	0	2	4	0	2	10	0	0	0	0	0	0	0	0	2	0	0	0	122	0	0	2	0	0
Otu00430	Bacteria(100)	Planctomycetes(100)	Planctomycetacia(100)	Planctomycetales(100)	Planctomycetaceae(100)	Planctomycetaceae_unclassified(100)	0	0	0	0	0	0	0	0	0	0	0	0	0	0	0	0	0	0	0	0	0	0	0	0	0	0	0	0	0	0	0	0	0	0	0	0	0	0	12	0	0	0	0
Otu00433	Bacteria(100)	Proteobacteria(100)	Betaproteobacteria(100)	Betaproteobacteria_unclassified(100)	Betaproteobacteria_unclassified(100)	Betaproteobacteria_unclassified(100)	0	0	0	0	0	0	0	0	0	0	0	0	0	0	0	0	0	0	0	0	0	0	0	0	0	0	0	0	0	0	0	0	0	0	0	0	0	219	366	89	259	3	33
Otu00434	Bacteria(100)	Proteobacteria(100)	Alphaproteobacteria(100)	Rhizobiales(100)	Bradyrhizobiaceae(100)	Bradyrhizobiaceae_unclassified(100)	0	0	0	0	0	0	0	0	0	0	0	0	0	1	0	0	0	0	0	0	0	0	0	0	0	0	0	0	0	0	0	0	0	0	0	0	0	28	65	0	86	220	9
Otu00435	Bacteria(100)	Firmicutes(100)	Clostridia(100)	Clostridiales(100)	Ruminococcaceae(100)	Ruminococcaceae_unclassified(100)	0	0	0	0	0	0	0	0	0	0	0	0	0	0	2	0	11	0	0	5	0	0	0	7	0	0	215	0	0	0	0	0	0	0	0	0	0	0	0	0	0	0	0
Otu00407	Bacteria(100)	Proteobacteria(100)	Alphaproteobacteria(100)	Rhizobiales(100)	Methylobacteriaceae(100)	Methylobacterium(100)	0	0	0	0	0	0	0	0	0	6	0	0	0	0	0	0	0	0	0	0	0	0	0	0	0	0	0	0	0	0	0	0	0	0	0	0	0	199	184	29	21	0	70
Otu00436	Bacteria(100)	Bacteroidetes(100)	Sphingobacteria(100)	Sphingobacteriales(100)	Sphingobacteriaceae(100)	Pedobacter(100)	0	34	0	0	0	51	6	2	12	0	0	0	26	0	32	0	0	3	3	1	0	0	6	0	1	0	0	0	0	0	7	0	0	0	0	0	0	34	7	10	92	0	59
Otu00437	Bacteria(100)	Planctomycetes(100)	Planctomycetacia(100)	Planctomycetales(100)	Planctomycetaceae(100)	Singulisphaera(100)	4	0	0	0	0	0	0	0	0	0	0	0	0	5	0	0	0	0	0	4	0	45	10	0	13	0	0	0	0	0	0	0	0	1	0	2	0	25	159	0	131	9	14
Otu00432	Bacteria(100)	Proteobacteria(100)	Gammaproteobacteria(100)	Enterobacteriales(100)	Enterobacteriaceae(100)	Providencia(85)	0	0	0	0	0	0	0	1	0	0	0	0	0	0	0	0	0	0	0	0	0	0	0	0	0	0	0	0	0	0	0	0	0	0	0	0	0	0	0	0	0	0	0
Otu00439	Bacteria(100)	Proteobacteria(100)	Betaproteobacteria(90)	Burkholderiales(90)	Burkholderiales_incertae_sedis(86)	Aquabacterium(86)	1	0	13	0	0	0	0	0	0	0	0	0	0	3	0	0	0	0	0	0	0	0	0	0	0	0	0	2	0	0	0	0	0	0	0	0	0	0	0	98	0	0	0
Otu00438	Bacteria(100)	Acidobacteria(100)	Acidobacteria_Gp16(100)	Acidobacteria_Gp16_order_incertae_sedis(100)	Acidobacteria_Gp16_family_incertae_sedis(100)	Gp16(100)	3	0	0	0	0	0	0	8	0	0	0	0	0	2	0	0	0	0	0	0	0	0	0	0	0	0	0	0	0	0	0	0	0	0	0	0	0	0	0	0	0	0	0
Otu00440	Bacteria(100)	Firmicutes(100)	Clostridia(100)	Clostridiales(100)	Lachnospiraceae(100)	Clostridium_XlVb(100)	0	0	0	0	0	0	0	0	0	0	0	0	0	0	0	0	3	0	0	0	1	0	0	0	0	0	0	0	0	0	0	0	0	0	0	0	0	908	28	0	0	0	16
Otu00441	Bacteria(100)	Actinobacteria(100)	Actinobacteria(100)	Actinomycetales(100)	Actinomycetales_unclassified(100)	Actinomycetales_unclassified(100)	0	0	0	0	0	0	2	0	0	0	0	0	0	0	0	6	0	0	0	0	0	0	0	0	0	0	0	0	0	0	0	0	0	0	0	0	0	67	262	0	0	551	0
Otu00442	Bacteria(100)	Firmicutes(100)	Clostridia(100)	Clostridiales(100)	Clostridiales_Incertae_Sedis_XI(100)	Anaerococcus(100)	0	0	0	0	0	0	0	0	983	0	0	1	0	3	0	0	0	0	0	0	0	0	0	0	0	0	0	0	0	0	0	0	0	0	0	0	0	0	0	0	0	0	0
Otu00444	Bacteria(100)	Proteobacteria(100)	Alphaproteobacteria(100)	Rhizobiales(100)	Rhizobiales_unclassified(100)	Rhizobiales_unclassified(100)	1	5	0	0	0	0	3	0	0	0	0	0	0	0	0	0	0	0	0	0	0	0	0	0	0	0	0	0	0	0	0	0	0	0	0	0	32	40	0	0	0	0	0
Otu00445	Bacteria(100)	Bacteria_unclassified(100)	Bacteria_unclassified(100)	Bacteria_unclassified(100)	Bacteria_unclassified(100)	Bacteria_unclassified(100)	0	0	0	0	0	0	0	0	0	0	0	0	0	0	6	0	0	0	0	0	1	0	0	0	0	0	0	0	0	0	0	0	0	0	0	0	0	0	0	0	0	0	0
Otu00446	Bacteria(100)	Bacteria_unclassified(100)	Bacteria_unclassified(100)	Bacteria_unclassified(100)	Bacteria_unclassified(100)	Bacteria_unclassified(100)	0	0	5	0	0	26	0	0	0	0	0	0	0	0	3	0	0	0	0	0	1	1	1	0	0	0	0	0	0	0	0	0	0	0	0	0	0	13	641	0	26	0	146
Otu00448	Bacteria(100)	Bacteroidetes(100)	Bacteroidia(100)	Bacteroidales(100)	Rikenellaceae(100)	Alistipes(100)	0	0	0	0	0	0	0	0	0	0	0	0	0	0	0	0	0	0	0	0	0	0	0	0	0	0	0	0	0	0	0	0	0	0	0	0	0	0	0	0	0	0	0
Otu00431	Bacteria(100)	Firmicutes(100)	Negativicutes(100)	Selenomonadales(100)	Selenomonadales_unclassified(98)	Selenomonadales_unclassified(98)	0	0	0	0	0	0	0	0	0	0	0	0	0	0	0	0	0	0	0	0	0	0	0	0	0	0	0	0	0	0	0	0	0	0	0	0	0	0	0	0	0	945	0
Otu00447	Bacteria(100)	Acidobacteria(100)	Acidobacteria_Gp1(100)	Acidobacteria_Gp1_order_incertae_sedis(100)	Acidobacteria_Gp1_family_incertae_sedis(100)	Gp1(100)	1	1	3	0	0	0	0	0	0	0	0	0	0	0	0	0	0	0	0	0	0	0	0	0	0	0	0	0	0	0	0	0	0	0	0	0	0	146	0	0	176	0	63
Otu00449	Bacteria(100)	Proteobacteria(100)	Alphaproteobacteria(100)	Rhizobiales(100)	Methylobacteriaceae(100)	Methylobacterium(100)	0	0	0	0	0	0	0	0	0	0	0	0	0	0	0	0	0	0	0	0	0	0	0	0	0	0	0	0	0	0	0	0	0	0	0	0	0	14	16	0	31	0	0
Otu00450	Bacteria(100)	Actinobacteria(100)	Actinobacteria(100)	Actinobacteria_unclassified(100)	Actinobacteria_unclassified(100)	Actinobacteria_unclassified(100)	0	0	0	0	0	0	0	0	0	0	0	0	0	0	0	0	0	0	0	0	0	3	0	0	2	0	0	0	0	0	0	0	0	0	0	0	0	0	0	0	0	0	0
Otu00451	Bacteria(100)	Proteobacteria(100)	Epsilonproteobacteria(100)	Campylobacterales(100)	Campylobacteraceae(100)	Arcobacter(100)	0	0	0	0	0	0	0	0	0	0	0	0	0	0	0	0	0	0	0	0	0	0	0	1	2	0	0	0	0	0	0	0	0	0	0	0	0	0	0	0	0	0	0
Otu00452	Bacteria(100)	Deinococcus-Thermus(100)	Deinococci(100)	Thermales(100)	Thermaceae(100)	Thermus(100)	0	0	0	0	0	0	0	0	0	0	0	0	0	0	0	0	0	0	0	0	0	0	0	0	0	0	0	0	0	0	0	0	0	0	0	0	0	0	0	1	0	0	0
Otu00453	Bacteria(100)	Planctomycetes(100)	Planctomycetacia(100)	Planctomycetales(100)	Planctomycetaceae(100)	Planctomyces(100)	0	0	0	0	0	0	0	0	0	0	0	0	0	0	0	0	0	0	0	0	0	0	0	0	0	0	0	0	0	0	0	0	0	0	0	0	0	30	0	0	24	0	0
Otu00456	Bacteria(100)	Bacteria_unclassified(100)	Bacteria_unclassified(100)	Bacteria_unclassified(100)	Bacteria_unclassified(100)	Bacteria_unclassified(100)	0	0	0	0	0	0	0	0	0	0	0	0	0	4	0	0	0	0	0	0	0	2	0	0	0	0	0	0	0	0	0	0	0	0	0	0	0	94	0	0	0	0	0
Otu00455	Bacteria(100)	Actinobacteria(100)	Actinobacteria(100)	Actinomycetales(100)	Pseudonocardiaceae(100)	Saccharothrix(98)	0	4	25	0	0	21	0	0	129	0	0	0	0	0	0	0	0	0	0	0	0	0	0	0	0	0	0	0	0	3	0	0	0	0	0	0	0	2	0	0	0	0	0
Otu00459	Bacteria(100)	Firmicutes(100)	Clostridia(100)	Clostridiales(100)	Lachnospiraceae(100)	Lachnospiraceae_unclassified(100)	0	0	0	0	0	0	0	0	0	0	0	0	0	0	0	2	0	0	0	0	1	1	0	0	0	0	0	0	0	0	0	0	0	0	0	10	0	305	112	18	18	0	99
Otu00458	Bacteria(100)	Actinobacteria(100)	Actinobacteria(100)	Solirubrobacterales(99)	Conexibacteraceae(85)	Conexibacter(85)	0	2	0	0	0	0	0	9	0	0	0	0	0	0	0	7	1	0	2	0	3	7	0	0	0	0	0	0	0	0	0	0	0	0	0	0	0	8	248	21	76	0	243
Otu00460	Bacteria(100)	Bacteria_unclassified(100)	Bacteria_unclassified(100)	Bacteria_unclassified(100)	Bacteria_unclassified(100)	Bacteria_unclassified(100)	0	0	0	0	0	0	0	0	0	0	0	0	0	0	0	0	0	0	0	0	0	0	0	0	0	0	0	0	0	0	0	12	0	0	0	2	0	0	0	0	0	0	0
Otu00461	Bacteria(100)	Bacteria_unclassified(100)	Bacteria_unclassified(100)	Bacteria_unclassified(100)	Bacteria_unclassified(100)	Bacteria_unclassified(100)	0	0	0	0	0	0	0	0	0	0	0	0	0	0	0	0	0	0	0	0	0	0	0	0	0	0	0	0	0	0	0	0	0	0	0	0	0	0	0	0	0	0	0
Otu00388	Bacteria(100)	Firmicutes(100)	Bacilli(100)	Bacillales(100)	Planococcaceae(51)	Planococcaceae_unclassified(51)	3	0	0	0	0	13	1	23	0	0	10	0	0	0	0	0	2	0	0	0	0	0	0	0	2	0	0	0	0	0	0	0	0	0	0	0	0	0	0	0	2	0	0
Otu00463	Bacteria(100)	Planctomycetes(100)	Planctomycetacia(100)	Planctomycetales(100)	Planctomycetaceae(100)	Zavarzinella(60)	0	0	0	0	0	0	0	0	0	0	0	0	0	0	0	0	0	0	0	0	0	0	0	0	0	0	0	0	0	0	0	0	0	0	0	0	0	0	0	0	0	0	0
Otu00454	Bacteria(100)	Proteobacteria(100)	Betaproteobacteria(100)	Burkholderiales(100)	Oxalobacteraceae(100)	Massilia(99)	1	15	5	0	0	19	3	0	0	0	0	0	0	6	0	0	0	0	0	0	0	0	0	4	0	0	0	0	0	0	0	0	0	0	0	0	0	7	0	0	4	0	0
Otu00462	Bacteria(100)	Planctomycetes(100)	Planctomycetacia(100)	Planctomycetales(100)	Planctomycetaceae(100)	Singulisphaera(100)	0	0	0	0	0	0	0	0	0	0	0	0	0	0	0	0	0	0	0	13	1	8	9	0	2	0	0	0	0	0	0	0	0	0	0	0	0	127	178	0	200	0	0
Otu00464	Bacteria(100)	Actinobacteria(100)	Actinobacteria(100)	Actinomycetales(100)	Actinomycetales_unclassified(100)	Actinomycetales_unclassified(100)	0	16	0	0	0	0	1	22	0	0	0	0	0	4	12	0	0	0	0	0	0	0	0	0	0	0	29	0	0	0	0	0	0	0	0	0	0	0	0	0	0	0	0
Otu00467	Bacteria(100)	Firmicutes(100)	Firmicutes_unclassified(100)	Firmicutes_unclassified(100)	Firmicutes_unclassified(100)	Firmicutes_unclassified(100)	0	0	0	0	0	0	0	0	0	0	0	0	0	0	0	0	0	0	0	0	0	0	0	0	0	0	0	0	0	0	0	4	0	0	0	1	0	4	10	0	270	0	447
Otu00465	Bacteria(100)	Acidobacteria(100)	Acidobacteria_Gp3(100)	Acidobacteria_Gp3_order_incertae_sedis(100)	Acidobacteria_Gp3_family_incertae_sedis(100)	Gp3(100)	0	0	0	0	0	0	0	0	0	0	0	0	0	0	0	0	0	0	0	0	0	0	0	0	0	0	0	0	0	0	0	0	0	0	0	0	0	60	0	0	0	0	0
Otu00076	Bacteria(100)	Proteobacteria(100)	Epsilonproteobacteria(100)	Campylobacterales(100)	Helicobacteraceae(100)	Helicobacter(100)	0	0	0	0	0	0	0	0	0	0	0	0	0	0	1	0	0	0	0	0	0	0	0	0	0	0	0	0	0	0	0	0	0	0	0	0	0	0	0	0	0	0	0
Otu00470	Bacteria(100)	Planctomycetes(100)	Planctomycetacia(100)	Planctomycetales(100)	Planctomycetaceae(100)	Singulisphaera(100)	0	0	0	0	0	0	0	0	0	0	0	0	0	0	0	0	0	0	0	0	0	0	1	0	0	0	0	0	0	0	0	0	0	0	0	0	0	7	373	160	127	0	0
Otu00443	Bacteria(100)	Actinobacteria(100)	Actinobacteria(100)	Actinomycetales(100)	Microbacteriaceae(100)	Microbacteriaceae_unclassified(86)	0	13	0	0	1	70	0	9	132	0	0	7	119	0	0	9	4	5	0	0	8	11	4	1	3	0	0	0	0	0	0	0	1	0	0	0	3	0	2	0	1	0	76
Otu00468	Bacteria(100)	Actinobacteria(100)	Actinobacteria(100)	Actinomycetales(100)	Nocardioidaceae(100)	Nocardioides(100)	0	0	0	0	0	0	0	9	0	0	0	0	0	0	0	6	4	0	0	0	1	0	0	0	0	0	0	0	0	0	9	0	0	2	0	4	0	16	64	0	4	0	42
Otu00469	Bacteria(100)	Proteobacteria(100)	Alphaproteobacteria(100)	Rhizobiales(100)	Hyphomicrobiaceae(81)	Devosia(81)	0	0	0	0	4	0	0	0	110	0	0	0	0	1	0	3	0	2	0	2	0	0	3	0	0	0	27	0	0	0	0	0	0	0	0	0	0	72	18	0	35	0	5
Otu00474	Bacteria(100)	Proteobacteria(100)	Alphaproteobacteria(100)	Rhizobiales(100)	Xanthobacteraceae(100)	Labrys(100)	0	0	0	0	0	0	0	0	0	0	0	0	0	0	0	0	0	1	0	0	12	23	9	0	12	0	0	0	0	0	0	0	6	0	0	1	0	78	264	1	95	0	23
Otu00466	Bacteria(100)	Actinobacteria(100)	Actinobacteria(100)	Actinomycetales(100)	Corynebacteriaceae(100)	Corynebacterium(100)	0	0	0	0	0	0	1	1	0	0	0	0	0	0	42	0	0	1	0	0	0	0	3	0	0	0	0	0	0	0	0	0	0	0	0	0	0	0	0	8	1	489	0
Otu00472	Bacteria(100)	Proteobacteria(100)	Alphaproteobacteria(100)	Sphingomonadales(100)	Sphingomonadaceae(100)	Sphingomonas(100)	0	0	5	0	0	0	2	5	0	0	0	0	0	5	0	0	0	0	0	0	0	0	0	0	4	0	0	0	0	0	0	0	0	0	0	0	0	43	0	0	32	0	53
Otu00475	Bacteria(100)	Proteobacteria(100)	Alphaproteobacteria(100)	Rhizobiales(100)	Rhizobiales_unclassified(100)	Rhizobiales_unclassified(100)	0	0	0	0	0	0	0	0	0	0	0	0	0	0	0	0	0	0	0	0	0	0	0	0	0	0	1	0	0	0	0	0	0	0	0	0	0	0	0	0	10	0	0
Otu00476	Bacteria(100)	Proteobacteria(100)	Alphaproteobacteria(100)	Rhizobiales(100)	Methylobacteriaceae(100)	Methylobacterium(100)	0	0	0	0	0	0	0	0	0	0	0	0	0	0	0	0	0	0	0	0	0	0	0	0	0	0	0	0	0	0	0	0	0	0	0	0	0	232	513	15	54	0	0
Otu00477	Bacteria(100)	Bacteroidetes(100)	Bacteroidetes_unclassified(100)	Bacteroidetes_unclassified(100)	Bacteroidetes_unclassified(100)	Bacteroidetes_unclassified(100)	0	0	0	0	0	0	0	0	0	0	0	0	0	0	0	0	0	0	0	0	0	0	0	0	0	0	0	0	0	0	0	0	0	0	0	0	0	0	0	0	0	0	0
Otu00478	Bacteria(100)	Actinobacteria(100)	Actinobacteria(100)	Actinomycetales(100)	Micrococcaceae(100)	Rothia(100)	0	0	0	0	0	0	0	0	0	0	0	0	0	0	93	0	0	0	0	0	0	0	0	0	0	0	0	0	0	0	0	0	0	0	0	0	0	0	0	0	6	0	0
Otu00479	Bacteria(100)	Bacteria_unclassified(100)	Bacteria_unclassified(100)	Bacteria_unclassified(100)	Bacteria_unclassified(100)	Bacteria_unclassified(100)	0	0	0	0	0	0	0	0	0	0	0	0	0	0	0	0	0	0	0	0	0	0	0	0	0	0	0	0	0	0	0	0	0	0	0	0	0	0	0	0	0	0	0
Otu00480	Bacteria(100)	Verrucomicrobia(100)	Spartobacteria(100)	Spartobacteria_order_incertae_sedis(100)	Spartobacteria_family_incertae_sedis(100)	Spartobacteria_genera_incertae_sedis(100)	0	0	0	0	0	0	0	0	0	0	0	0	0	0	0	0	0	0	0	0	0	0	0	0	0	0	0	0	0	0	0	0	0	0	0	0	0	147	0	0	138	0	13
Otu00481	Bacteria(100)	Proteobacteria(100)	Gammaproteobacteria(100)	Pseudomonadales(100)	Moraxellaceae(100)	Moraxellaceae_unclassified(100)	0	0	0	0	0	0	0	0	0	0	0	0	0	0	0	0	0	0	0	0	0	0	0	0	6	0	8	1	0	0	0	0	0	0	0	0	0	0	0	0	0	0	0
Otu00471	Bacteria(100)	Proteobacteria(100)	Alphaproteobacteria(100)	Rhizobiales(100)	Xanthobacteraceae(100)	Labrys(100)	0	6	0	3	0	0	0	0	0	0	0	0	0	2	18	17	2	5	0	1	1	3	3	1	3	0	0	0	0	0	1	0	0	0	0	0	0	82	232	0	0	0	0
Otu00457	Bacteria(100)	Verrucomicrobia(100)	Spartobacteria(100)	Spartobacteria_order_incertae_sedis(100)	Spartobacteria_family_incertae_sedis(100)	Spartobacteria_genera_incertae_sedis(100)	0	44	0	0	0	0	0	0	0	5	0	0	0	0	0	0	0	0	5	0	0	0	0	0	0	0	0	0	0	0	0	0	0	0	0	0	0	0	0	0	0	0	0
Otu00483	Bacteria(100)	Actinobacteria(100)	Actinobacteria(100)	Actinomycetales(100)	Actinomycetaceae(100)	Actinobaculum(100)	0	0	0	0	0	0	0	0	0	0	0	0	0	0	0	0	0	0	0	0	0	0	0	0	0	0	0	0	0	0	0	0	0	0	0	0	0	0	0	0	0	0	0
Otu00473	Bacteria(100)	Firmicutes(100)	Clostridia(100)	Clostridiales(100)	Ruminococcaceae(98)	Ruminococcaceae_unclassified(98)	0	17	0	0	0	0	0	0	0	0	0	0	0	0	0	1	0	0	0	0	0	0	0	0	0	0	0	0	0	0	0	0	0	0	0	0	0	12	67	0	12	781	0
Otu00482	Bacteria(100)	Firmicutes(100)	Clostridia(100)	Clostridiales(100)	Clostridiales_Incertae_Sedis_XI(100)	Finegoldia(100)	0	1	0	0	0	0	8	0	0	0	0	13	0	66	0	0	0	0	0	0	0	0	0	0	0	0	0	0	0	0	0	0	0	0	0	0	0	0	0	0	0	0	0
Otu00484	Bacteria(100)	Firmicutes(100)	Clostridia(100)	Clostridiales(100)	Lachnospiraceae(100)	Lachnospiraceae_unclassified(100)	0	0	0	0	0	0	0	0	0	0	0	0	0	0	0	0	0	0	0	0	0	0	0	0	0	0	0	0	0	0	0	0	0	0	0	0	0	0	0	0	0	0	0
Otu00485	Bacteria(100)	Bacteria_unclassified(94)	Bacteria_unclassified(94)	Bacteria_unclassified(94)	Bacteria_unclassified(94)	Bacteria_unclassified(94)	0	0	0	0	0	0	0	0	0	0	0	0	0	0	0	0	0	0	7	0	0	0	0	0	0	0	0	0	0	0	0	0	0	0	0	0	0	9	0	0	42	0	42
Otu00486	Bacteria(100)	Actinobacteria(100)	Actinobacteria(100)	Solirubrobacterales(100)	Conexibacteraceae(100)	Conexibacter(100)	0	0	0	0	0	0	0	0	587	0	0	0	0	0	0	8	0	3	0	0	0	0	0	0	0	0	0	0	0	0	0	0	0	0	0	1	0	0	0	0	8	0	0
Otu00489	Bacteria(100)	Planctomycetes(100)	Planctomycetacia(100)	Planctomycetales(100)	Planctomycetaceae(100)	Singulisphaera(99)	0	0	0	0	0	0	0	0	0	0	0	0	0	0	0	0	0	0	0	0	0	0	0	0	0	0	0	0	0	0	0	0	0	0	0	0	0	0	0	0	0	0	0
Otu00490	Bacteria(100)	Firmicutes(100)	Negativicutes(100)	Selenomonadales(100)	Veillonellaceae(100)	Zymophilus(100)	0	0	0	0	0	0	0	0	0	0	0	0	0	0	0	0	0	0	0	0	0	0	0	0	0	0	0	0	0	0	0	0	0	0	0	0	0	0	0	0	0	0	0
Otu00491	Bacteria(100)	Proteobacteria(100)	Betaproteobacteria(100)	Burkholderiales(100)	Comamonadaceae(100)	Albidiferax(99)	0	0	0	0	0	0	0	0	0	0	0	0	0	0	29	2	13	2	0	1	0	0	0	6	0	7	9	0	0	0	0	0	0	0	0	0	0	0	1	0	0	0	0
Otu00492	Bacteria(100)	Proteobacteria(100)	Alphaproteobacteria(100)	Rhizobiales(100)	Beijerinckiaceae(54)	Beijerinckia(54)	0	0	0	0	0	0	0	0	0	0	0	0	0	2	2	0	0	0	0	0	0	0	0	0	2	0	0	0	0	0	0	0	0	0	0	0	0	149	21	4	26	0	3
Otu00493	Bacteria(100)	Firmicutes(100)	Clostridia(100)	Clostridiales(100)	Ruminococcaceae(97)	Ruminococcaceae_unclassified(97)	0	21	0	0	0	0	0	14	0	0	0	0	0	0	0	0	0	0	0	0	0	2	2	0	0	0	0	0	0	0	0	1	0	0	0	0	25	86	249	163	56	0	68
Otu00494	Bacteria(100)	Firmicutes(100)	Clostridia(100)	Clostridiales(100)	Clostridiales_unclassified(100)	Clostridiales_unclassified(100)	0	0	0	0	0	0	0	0	0	0	0	0	0	0	166	0	0	0	0	0	0	1	0	0	0	0	7	2	0	0	0	0	0	0	0	0	57	0	0	0	0	5	0
Otu00495	Bacteria(100)	Actinobacteria(100)	Actinobacteria(100)	Bifidobacteriales(100)	Bifidobacteriaceae(100)	Gardnerella(100)	0	0	0	0	0	0	0	0	0	0	0	0	0	120	0	0	0	0	0	0	0	0	0	0	0	0	0	0	0	0	0	0	0	0	0	0	18	0	0	0	0	0	0
Otu00487	Bacteria(100)	Proteobacteria(100)	Gammaproteobacteria(56)	Gammaproteobacteria_unclassified(56)	Gammaproteobacteria_unclassified(56)	Gammaproteobacteria_unclassified(56)	0	3	12	0	0	0	0	0	0	0	0	0	0	0	3	0	0	0	0	0	1	0	0	0	0	0	0	0	0	0	0	0	0	0	0	0	0	0	7	0	0	0	14
Otu00496	Bacteria(100)	Bacteroidetes(100)	Bacteroidia(100)	Bacteroidales(100)	Porphyromonadaceae(100)	Porphyromonadaceae_unclassified(100)	0	0	0	0	0	0	0	0	0	0	0	0	0	0	0	0	0	0	0	0	0	0	0	0	0	0	0	0	0	0	0	0	0	0	0	0	0	0	0	0	0	0	0
Otu00498	Bacteria(100)	Proteobacteria(100)	Alphaproteobacteria(100)	Alphaproteobacteria_unclassified(100)	Alphaproteobacteria_unclassified(100)	Alphaproteobacteria_unclassified(100)	0	0	0	0	0	0	0	0	0	0	0	0	0	0	0	0	0	0	0	0	0	0	0	0	0	0	0	0	0	0	0	0	0	0	0	0	0	0	0	0	0	0	0
Otu00488	Bacteria(100)	Deinococcus-Thermus(100)	Deinococci(100)	Deinococcales(100)	Deinococcaceae(100)	Deinococcus(100)	5	25	4	0	0	52	6	0	0	0	0	0	0	1	0	0	0	0	0	0	0	0	0	0	0	0	0	0	0	0	0	0	0	0	0	0	0	0	0	0	0	0	0
Otu00497	Bacteria(100)	Proteobacteria(100)	Alphaproteobacteria(100)	Caulobacterales(100)	Caulobacteraceae(100)	Brevundimonas(100)	0	32	0	0	0	0	0	0	0	0	0	0	0	10	0	0	0	0	0	0	0	0	0	0	0	0	2	0	0	0	0	0	0	0	0	0	0	34	0	0	10	0	0
Otu00499	Bacteria(100)	Planctomycetes(100)	Planctomycetacia(100)	Planctomycetales(100)	Planctomycetaceae(100)	Planctomycetaceae_unclassified(100)	0	10	0	0	0	0	0	0	0	0	0	0	0	0	0	0	0	0	0	0	0	17	0	0	6	0	0	0	0	0	0	0	0	0	0	0	0	9	50	0	26	0	197
Otu00502	Bacteria(100)	Acidobacteria(100)	Acidobacteria_Gp16(100)	Acidobacteria_Gp16_order_incertae_sedis(100)	Acidobacteria_Gp16_family_incertae_sedis(100)	Gp16(100)	0	0	0	0	0	0	0	0	0	0	0	16	0	8	0	0	0	0	3	0	0	0	0	0	0	0	0	0	0	0	0	1	0	0	0	0	0	0	0	0	0	0	0
Otu00503	Bacteria(100)	Proteobacteria(100)	Alphaproteobacteria(100)	Rhodospirillales(100)	Acetobacteraceae(100)	Acidisoma(100)	0	0	0	0	0	0	0	0	0	0	0	0	0	0	0	0	0	0	0	0	0	0	0	0	0	0	0	0	0	0	0	0	0	0	0	0	0	289	200	110	94	0	0
Otu00504	Bacteria(100)	Planctomycetes(100)	Planctomycetacia(100)	Planctomycetales(100)	Planctomycetaceae(100)	Singulisphaera(100)	0	0	0	0	0	0	0	0	0	0	0	0	0	0	0	0	0	0	0	0	0	0	0	0	0	0	0	0	0	0	0	0	0	0	0	0	0	0	0	1	0	0	0
Otu00501	Bacteria(100)	Firmicutes(100)	Bacilli(100)	Bacillales(100)	Staphylococcaceae(100)	Jeotgalicoccus(100)	0	52	0	0	0	0	0	0	0	0	0	0	0	0	0	0	0	0	0	0	0	0	0	0	0	0	0	0	0	0	0	0	0	0	0	0	0	0	0	0	0	0	0
Otu00505	Bacteria(100)	Proteobacteria(100)	Betaproteobacteria(100)	Rhodocyclales(100)	Rhodocyclaceae(100)	Sterolibacterium(100)	0	0	0	0	0	0	0	0	0	0	0	0	0	0	0	0	0	0	0	0	0	0	0	0	0	0	0	0	0	0	0	0	0	0	0	0	0	0	0	0	0	0	0
Otu00507	Bacteria(100)	Bacteroidetes(100)	Flavobacteria(100)	Flavobacteriales(100)	Flavobacteriaceae(100)	Flavobacterium(100)	0	0	0	0	0	35	0	1	0	0	0	0	0	0	42	0	0	0	0	0	0	0	0	0	0	0	28	0	0	0	0	0	0	0	0	0	0	0	0	10	0	0	0
Otu00508	Bacteria(100)	Bacteria_unclassified(100)	Bacteria_unclassified(100)	Bacteria_unclassified(100)	Bacteria_unclassified(100)	Bacteria_unclassified(100)	0	0	0	0	0	0	0	0	0	0	0	0	0	0	0	0	0	0	0	0	0	0	0	0	0	0	0	0	0	0	0	0	0	0	0	0	0	0	0	0	0	0	0
Otu00509	Bacteria(100)	Bacteria_unclassified(100)	Bacteria_unclassified(100)	Bacteria_unclassified(100)	Bacteria_unclassified(100)	Bacteria_unclassified(100)	0	0	0	0	0	0	0	0	0	0	0	0	0	0	0	0	0	0	0	0	0	0	0	0	0	0	0	0	0	0	0	0	0	0	0	0	0	0	0	0	0	0	0
Otu00510	Bacteria(100)	Firmicutes(100)	Clostridia(100)	Clostridiales(100)	Lachnospiraceae(100)	Roseburia(99)	0	0	0	0	0	0	0	0	0	0	0	0	0	30	0	0	0	0	0	0	0	0	0	9	3	2	88	0	0	1	0	0	0	0	0	0	0	0	0	0	0	0	0
Otu00511	Bacteria(100)	Bacteria_unclassified(100)	Bacteria_unclassified(100)	Bacteria_unclassified(100)	Bacteria_unclassified(100)	Bacteria_unclassified(100)	0	0	0	0	0	0	0	0	0	0	0	0	0	0	0	0	0	0	12	0	0	0	0	0	0	0	0	0	0	0	0	0	0	0	0	0	0	0	0	0	0	0	0
Otu00513	Bacteria(100)	Bacteria_unclassified(100)	Bacteria_unclassified(100)	Bacteria_unclassified(100)	Bacteria_unclassified(100)	Bacteria_unclassified(100)	0	0	0	0	0	0	0	0	0	0	0	0	0	0	0	0	0	0	0	0	0	0	0	0	0	0	0	0	0	0	0	0	0	0	0	0	0	0	0	0	0	0	0
Otu00515	Bacteria(100)	Proteobacteria(100)	Gammaproteobacteria(100)	Enterobacteriales(100)	Enterobacteriaceae(100)	Enterobacteriaceae_unclassified(100)	0	0	0	0	0	0	0	736	0	0	0	0	0	0	0	0	0	0	0	0	0	0	0	0	0	0	0	0	0	0	0	0	0	0	0	0	0	0	0	0	0	0	0
Otu00516	Bacteria(100)	Proteobacteria(100)	Betaproteobacteria(100)	Betaproteobacteria_unclassified(100)	Betaproteobacteria_unclassified(100)	Betaproteobacteria_unclassified(100)	0	0	0	0	0	0	0	0	0	0	0	0	0	0	0	0	0	0	0	0	0	0	0	0	0	0	0	0	0	0	0	0	0	0	0	0	0	0	0	0	1	0	0
Otu00517	Bacteria(100)	Firmicutes(100)	Clostridia(100)	Clostridiales(100)	Lachnospiraceae(100)	Lachnospiraceae_unclassified(100)	0	0	0	0	0	0	0	0	0	0	0	0	0	0	0	0	0	0	0	0	0	0	0	0	0	0	0	0	0	0	0	0	0	0	0	0	0	0	0	0	0	858	0
Otu00519	Bacteria(100)	Armatimonadetes(100)	Armatimonadetes_gp2_class_incertae_sedis(100)	Armatimonadetes_gp2_order_incetae_sedis(100)	Armatimonadetes_gp2_family_incetae_sedis(100)	Armatimonadetes_gp2(100)	0	0	0	0	0	0	0	0	0	0	0	0	0	0	0	0	0	0	0	0	0	0	0	0	0	0	0	0	0	0	0	0	0	0	0	0	0	0	0	0	0	0	0
Otu00520	Bacteria(100)	Firmicutes(100)	Clostridia(100)	Clostridiales(100)	Lachnospiraceae(100)	Lachnospiracea_incertae_sedis(97)	0	0	0	0	0	0	0	0	0	0	0	0	0	8	0	0	0	0	2	0	1	0	0	0	3	0	0	0	0	0	0	0	0	0	0	0	0	0	0	0	0	0	0
Otu00521	Bacteria(100)	Proteobacteria(100)	Alphaproteobacteria(100)	Rhodobacterales(100)	Rhodobacteraceae(100)	Rhodobacteraceae_unclassified(99)	0	0	0	0	0	0	0	0	0	0	0	0	0	0	0	4	0	0	0	0	0	0	0	0	0	0	0	0	0	0	0	0	0	0	0	0	0	0	0	0	0	0	1
Otu00518	Bacteria(100)	Proteobacteria(100)	Alphaproteobacteria(100)	Rhizobiales(100)	Methylobacteriaceae(100)	Methylobacteriaceae_unclassified(97)	0	0	0	0	0	0	1	0	0	0	0	0	0	0	0	0	6	0	0	0	0	2	0	0	0	0	0	0	0	0	0	0	0	0	0	0	0	290	297	185	1	0	1
Otu00524	Bacteria(100)	Planctomycetes(100)	Planctomycetacia(100)	Planctomycetales(100)	Planctomycetaceae(100)	Singulisphaera(100)	0	0	0	0	0	0	0	0	0	0	0	0	0	0	0	0	0	0	0	0	0	0	0	0	0	0	0	0	0	0	0	0	0	0	0	0	0	89	368	60	71	0	0
Otu00506	Bacteria(100)	Actinobacteria(100)	Actinobacteria(100)	Actinobacteria_unclassified(100)	Actinobacteria_unclassified(100)	Actinobacteria_unclassified(100)	0	34	0	0	0	33	0	6	0	0	0	4	44	0	0	2	8	0	0	0	9	0	0	0	0	0	0	0	0	0	0	2	0	0	0	0	0	61	87	0	43	0	101
Otu00522	Bacteria(100)	Acidobacteria(100)	Acidobacteria_Gp1(100)	Acidobacteria_Gp1_order_incertae_sedis(100)	Acidobacteria_Gp1_family_incertae_sedis(100)	Gp1(100)	0	0	0	0	0	0	0	0	0	0	0	0	0	5	0	1	0	0	0	4	0	2	3	0	6	0	0	0	0	0	0	0	0	0	0	0	0	2	4	0	94	0	4
Otu00527	Bacteria(100)	Bacteria_unclassified(100)	Bacteria_unclassified(100)	Bacteria_unclassified(100)	Bacteria_unclassified(100)	Bacteria_unclassified(100)	0	0	0	0	0	0	0	0	0	0	0	0	0	0	0	0	0	0	0	0	0	0	0	0	0	0	0	0	0	0	0	0	0	0	0	0	0	0	0	0	1	0	0
Otu00528	Bacteria(100)	Bacteria_unclassified(100)	Bacteria_unclassified(100)	Bacteria_unclassified(100)	Bacteria_unclassified(100)	Bacteria_unclassified(100)	0	0	0	0	0	0	0	0	834	0	0	0	0	0	0	0	0	0	0	0	0	0	0	0	0	0	0	0	0	0	0	0	0	0	0	0	0	0	0	0	0	0	0
Otu00530	Bacteria(100)	Proteobacteria(100)	Gammaproteobacteria(100)	Pseudomonadales(100)	Pseudomonadaceae(100)	Pseudomonas(100)	0	0	0	0	0	0	0	0	0	0	0	0	0	0	17	0	0	0	0	0	0	0	0	0	4	0	9	0	0	0	0	0	0	0	0	0	0	0	0	0	0	0	0
Otu00531	Bacteria(100)	Firmicutes(100)	Bacilli(100)	Lactobacillales(100)	Leuconostocaceae(100)	Leuconostoc(100)	0	0	0	0	0	0	0	143	0	0	3	4	652	0	0	0	0	0	0	0	0	0	0	0	0	0	0	0	0	0	0	0	0	0	0	0	0	0	0	0	0	0	0
Otu00525	Bacteria(100)	Planctomycetes(100)	Planctomycetacia(100)	Planctomycetales(100)	Planctomycetaceae(100)	Singulisphaera(100)	0	0	0	0	0	0	0	0	0	0	0	0	0	0	0	0	0	0	0	0	0	0	0	0	0	0	0	0	0	0	0	0	0	0	0	0	0	23	70	2	70	0	126
Otu00533	Bacteria(100)	Planctomycetes(100)	Planctomycetacia(100)	Planctomycetales(100)	Planctomycetaceae(100)	Gemmata(100)	0	0	0	0	0	0	0	0	0	0	0	0	0	0	0	0	0	0	0	0	0	4	0	0	2	0	0	0	0	0	0	0	0	0	0	0	0	3	0	0	0	0	0
Otu00532	Bacteria(100)	Acidobacteria(100)	Acidobacteria_Gp6(100)	Acidobacteria_Gp6_order_incertae_sedis(100)	Acidobacteria_Gp6_family_incertae_sedis(100)	Gp6(100)	0	33	0	0	0	0	0	0	0	0	0	0	0	13	0	0	0	0	0	0	0	0	0	0	0	0	0	0	0	0	0	0	0	0	0	0	0	0	40	0	0	0	0
Otu00526	Bacteria(100)	Proteobacteria(100)	Alphaproteobacteria(100)	Rhizobiales(100)	Rhizobiales_unclassified(94)	Rhizobiales_unclassified(94)	0	1	0	0	0	0	0	6	0	0	0	0	0	3	0	2	11	0	5	0	0	0	6	2	9	0	0	0	0	0	0	0	0	0	0	0	0	22	0	0	65	0	0
Otu00534	Bacteria(100)	Planctomycetes(100)	Planctomycetacia(100)	Planctomycetales(100)	Planctomycetaceae(100)	Singulisphaera(100)	1	17	0	0	0	0	0	0	0	0	0	0	0	2	0	0	0	0	0	0	0	0	0	0	3	0	0	0	0	0	0	0	0	0	0	0	0	22	98	0	117	0	91
Otu00536	Bacteria(100)	Proteobacteria(100)	Betaproteobacteria(100)	Burkholderiales(100)	Comamonadaceae(99)	Hydrogenophaga(95)	1	9	2	0	0	0	4	1	470	0	0	0	0	0	0	0	0	0	0	0	0	0	0	0	0	2	5	0	0	0	0	0	0	0	0	0	0	0	0	0	0	0	0
Otu00537	Bacteria(100)	Bacteroidetes(100)	Bacteroidetes_unclassified(100)	Bacteroidetes_unclassified(100)	Bacteroidetes_unclassified(100)	Bacteroidetes_unclassified(100)	0	0	0	0	0	0	0	0	0	0	0	0	0	0	0	0	0	0	0	0	0	0	0	0	0	0	0	0	0	0	0	0	0	0	0	0	0	0	0	0	0	0	0
Otu00538	Bacteria(100)	Proteobacteria(100)	Proteobacteria_unclassified(99)	Proteobacteria_unclassified(99)	Proteobacteria_unclassified(99)	Proteobacteria_unclassified(99)	0	0	0	0	0	0	0	0	0	0	0	0	0	0	0	0	0	0	0	0	0	0	0	0	0	0	0	0	0	0	0	0	0	0	0	0	0	0	0	0	0	0	0
Otu00539	Bacteria(100)	OD1(100)	OD1_class_incertae_sedis(100)	OD1_order_incertae_sedis(100)	OD1_family_incertae_sedis(100)	OD1_genus_incertae_sedis(100)	0	0	0	0	0	0	0	0	0	0	0	0	0	0	0	0	0	0	0	0	0	0	0	0	0	0	38	0	0	0	0	0	0	0	0	0	0	0	0	0	0	0	0
Otu00542	Bacteria(100)	Bacteria_unclassified(100)	Bacteria_unclassified(100)	Bacteria_unclassified(100)	Bacteria_unclassified(100)	Bacteria_unclassified(100)	0	0	0	0	0	0	0	0	0	0	0	0	0	0	0	0	0	0	0	0	0	0	0	0	0	0	27	0	0	0	0	0	0	0	0	0	0	0	0	0	0	0	0
Otu00541	Bacteria(100)	Bacteroidetes(100)	Sphingobacteria(100)	Sphingobacteriales(100)	Sphingobacteriaceae(100)	Pedobacter(100)	0	0	0	0	0	0	0	11	0	0	2	0	0	0	0	0	0	5	0	0	0	0	0	0	1	0	0	0	0	0	0	0	0	0	0	0	0	12	0	0	15	0	0
Otu00540	Bacteria(100)	Proteobacteria(100)	Alphaproteobacteria(100)	Sphingomonadales(100)	Sphingomonadaceae(100)	Novosphingobium(99)	0	19	1	0	0	0	0	0	46	0	0	0	0	4	0	0	0	0	0	0	0	3	0	0	0	0	125	0	0	0	0	0	0	0	0	0	0	66	37	0	1	0	0
Otu00543	Bacteria(100)	Bacteria_unclassified(100)	Bacteria_unclassified(100)	Bacteria_unclassified(100)	Bacteria_unclassified(100)	Bacteria_unclassified(100)	0	0	0	0	0	0	0	0	0	0	0	0	0	0	0	0	0	0	0	0	0	0	0	0	2	0	0	0	0	0	0	0	0	0	0	0	0	47	0	0	0	0	0
Otu00523	Bacteria(100)	Proteobacteria(100)	Gammaproteobacteria(100)	Pseudomonadales(100)	Moraxellaceae(100)	Acinetobacter(100)	0	0	0	0	0	0	0	0	0	29	0	0	0	6	0	0	0	0	5	0	0	0	0	0	0	0	0	0	0	0	0	0	0	0	0	0	0	0	0	0	0	0	14
Otu00544	Bacteria(100)	Planctomycetes(100)	Planctomycetacia(100)	Planctomycetales(100)	Planctomycetaceae(100)	Singulisphaera(100)	0	0	1	0	0	0	0	0	0	0	0	0	0	2	0	0	0	0	0	0	0	0	2	0	0	0	0	0	0	0	0	0	0	0	0	0	0	7	225	0	104	0	0
Otu00546	Bacteria(100)	Planctomycetes(100)	Planctomycetacia(100)	Planctomycetales(100)	Planctomycetaceae(100)	Planctomycetaceae_unclassified(100)	0	0	0	0	0	0	0	0	0	0	0	0	0	0	0	0	0	0	0	0	0	0	0	0	0	0	0	0	0	0	0	0	0	0	0	0	0	0	0	0	0	774	0
Otu00547	Bacteria(100)	Actinobacteria(100)	Actinobacteria(100)	Actinomycetales(100)	Actinomycetaceae(100)	Actinomyces(100)	0	0	0	0	0	0	0	0	0	0	0	0	0	0	0	0	0	0	0	2	0	0	1	0	0	0	0	0	0	0	0	0	0	0	0	0	0	0	0	0	0	0	0
Otu00548	Bacteria(100)	Actinobacteria(100)	Actinobacteria(100)	Solirubrobacterales(100)	Conexibacteraceae(90)	Conexibacter(90)	0	0	0	0	0	0	0	0	0	0	0	0	0	0	0	0	0	0	0	0	0	8	0	0	2	0	0	0	0	0	0	0	0	0	0	0	0	0	0	0	30	0	182
Otu00550	Bacteria(100)	Actinobacteria(100)	Actinobacteria(100)	Actinomycetales(100)	Nocardioidaceae(100)	Nocardioides(98)	0	8	9	0	4	0	0	0	0	0	0	0	57	0	0	12	9	0	0	0	7	2	0	1	6	0	0	0	0	0	0	3	0	0	0	7	0	21	0	0	2	0	1
Otu00552	Bacteria(100)	Actinobacteria(100)	Actinobacteria(100)	Actinomycetales(100)	Actinomycetales_unclassified(100)	Actinomycetales_unclassified(100)	0	0	0	0	0	0	0	0	0	0	0	0	0	0	0	5	1	0	0	0	0	1	4	0	2	0	0	0	0	0	0	0	0	0	0	0	0	27	67	0	15	432	0
Otu00553	Bacteria(100)	Acidobacteria(100)	Acidobacteria_Gp1(100)	Acidobacteria_Gp1_order_incertae_sedis(100)	Acidobacteria_Gp1_family_incertae_sedis(100)	Gp1(100)	0	25	0	0	0	0	0	0	0	0	0	1	0	0	0	0	0	0	0	0	0	0	0	0	0	0	0	0	0	0	0	0	0	0	0	0	0	117	20	0	69	0	92
Otu00551	Bacteria(100)	OD1(99)	OD1_class_incertae_sedis(99)	OD1_order_incertae_sedis(99)	OD1_family_incertae_sedis(99)	OD1_genus_incertae_sedis(99)	0	0	0	0	0	0	1	12	0	0	0	0	0	0	0	0	0	0	1	0	0	0	0	0	0	0	2	0	0	0	0	2	0	0	0	0	0	0	0	0	0	0	19
Otu00554	Bacteria(100)	Firmicutes(100)	Clostridia(100)	Clostridiales(100)	Clostridiales_unclassified(100)	Clostridiales_unclassified(100)	0	3	0	0	0	2	0	0	0	0	0	0	0	0	0	0	1	0	0	0	0	0	0	0	0	0	0	0	0	0	0	12	0	0	0	0	0	96	616	0	28	0	0
Otu00549	Bacteria(100)	Planctomycetes(100)	Planctomycetacia(100)	Planctomycetales(100)	Planctomycetaceae(100)	Singulisphaera(100)	0	0	0	0	1	0	0	0	0	0	0	0	0	3	0	0	0	0	0	0	0	0	0	0	0	0	0	0	0	0	0	0	0	0	0	0	0	190	109	0	0	0	0
Otu00535	Bacteria(100)	Actinobacteria(100)	Actinobacteria(100)	Actinobacteria_unclassified(95)	Actinobacteria_unclassified(95)	Actinobacteria_unclassified(95)	0	12	0	0	4	0	0	2	0	0	0	0	0	0	0	17	6	0	0	3	3	5	0	3	5	0	0	0	0	0	1	1	0	0	0	1	0	7	69	0	29	0	116
Otu00545	Bacteria(100)	Actinobacteria(100)	Actinobacteria(100)	Actinomycetales(100)	Micromonosporaceae(100)	Micromonosporaceae_unclassified(68)	0	0	0	0	0	0	4	12	0	0	2	0	0	0	0	5	1	0	0	3	0	0	0	0	0	0	0	0	0	0	0	0	0	0	0	0	0	32	227	0	80	0	160
Otu00556	Bacteria(100)	Firmicutes(100)	Clostridia(100)	Clostridiales(100)	Lachnospiraceae(100)	Blautia(100)	0	0	0	0	0	0	0	0	0	0	0	0	0	16	0	0	0	0	0	0	0	0	0	0	0	0	0	0	0	0	0	0	0	0	0	0	0	0	0	0	0	0	0
Otu00557	Bacteria(100)	Actinobacteria(100)	Actinobacteria(100)	Coriobacteriales(100)	Coriobacteriaceae(100)	Coriobacteriaceae_unclassified(86)	0	295	19	0	0	90	0	0	0	0	0	0	0	3	0	2	0	0	1	9	2	10	4	0	14	0	0	0	0	0	0	0	0	0	0	0	0	13	20	1	12	154	65
Otu00559	Bacteria(100)	Bacteroidetes(100)	Sphingobacteria(100)	Sphingobacteriales(100)	Sphingobacteriaceae(100)	Mucilaginibacter(93)	0	5	0	0	0	0	0	0	0	0	0	0	0	0	0	0	0	0	0	0	0	0	0	0	4	0	6	0	0	0	0	0	0	0	0	4	0	96	0	0	36	0	21
Otu00560	Bacteria(100)	Proteobacteria(100)	Gammaproteobacteria(100)	Oceanospirillales(100)	Oceanospirillaceae(100)	Marinospirillum(100)	0	0	0	0	0	0	0	0	0	0	0	0	0	0	32	0	0	4	0	0	0	0	0	0	2	0	0	0	0	0	0	0	0	0	0	0	0	0	0	0	0	0	0
Otu00558	Bacteria(100)	Fusobacteria(100)	Fusobacteria(100)	Fusobacteriales(100)	Fusobacteriaceae(100)	Fusobacteriaceae_unclassified(100)	0	0	0	0	0	0	0	0	0	0	0	0	0	0	9	0	0	0	14	0	3	0	1	0	0	0	0	0	3	0	0	0	0	0	0	0	0	0	0	0	0	0	0
Otu00500	Bacteria(100)	Tenericutes(100)	Mollicutes(100)	Mycoplasmatales(100)	Mycoplasmataceae(100)	Mycoplasmataceae_unclassified(100)	0	0	0	0	0	0	0	0	0	0	0	0	0	0	0	0	0	0	0	0	0	0	0	0	0	0	0	0	0	0	0	0	0	0	0	0	0	0	0	0	0	0	0
Otu00562	Bacteria(100)	Bacteroidetes(100)	Bacteroidia(100)	Bacteroidales(100)	Bacteroidaceae(100)	Bacteroides(100)	0	0	0	0	0	0	0	0	0	0	0	0	0	0	0	0	0	0	0	0	0	0	0	0	0	0	0	0	0	0	0	0	0	0	0	0	0	0	0	0	0	0	0
Otu00563	Bacteria(100)	Proteobacteria(100)	Gammaproteobacteria(100)	Alteromonadales(96)	Alteromonadaceae(96)	Haliea(96)	0	0	0	0	0	0	0	0	0	0	0	0	0	0	0	0	0	6	0	0	0	0	0	0	0	0	0	0	0	0	0	0	0	0	0	0	0	0	0	0	0	0	0
Otu00561	Bacteria(100)	Proteobacteria(100)	Gammaproteobacteria(100)	Pseudomonadales(100)	Moraxellaceae(100)	Acinetobacter(100)	5	0	0	0	0	0	0	0	5	0	0	0	0	0	0	0	0	0	0	0	1	0	0	0	0	0	0	0	0	0	0	0	0	0	0	0	0	0	0	0	0	0	0
Otu00564	Bacteria(100)	Proteobacteria(100)	Proteobacteria_unclassified(100)	Proteobacteria_unclassified(100)	Proteobacteria_unclassified(100)	Proteobacteria_unclassified(100)	0	0	0	0	0	0	0	0	0	0	0	0	0	0	0	0	0	0	0	0	0	0	0	0	0	0	0	0	0	0	0	0	0	0	0	0	0	0	0	0	0	755	0
Otu00565	Bacteria(100)	Firmicutes(100)	Bacilli(100)	Lactobacillales(100)	Lactobacillaceae(100)	Lactobacillus(100)	0	0	0	0	0	0	0	0	0	0	0	0	0	54	0	0	0	0	0	0	0	0	0	0	0	0	0	0	0	0	0	0	0	0	0	0	0	0	0	0	0	0	0
Otu00566	Bacteria(100)	Proteobacteria(100)	Alphaproteobacteria(100)	Rhodospirillales(100)	Acetobacteraceae(100)	Acetobacteraceae_unclassified(100)	0	0	0	0	0	0	0	0	0	0	0	0	0	0	0	0	0	0	0	0	0	0	0	0	0	0	0	0	0	0	0	0	0	0	0	0	0	134	478	0	90	0	0
Otu00569	Bacteria(100)	Acidobacteria(100)	Acidobacteria_Gp4(100)	Acidobacteria_Gp4_order_incertae_sedis(100)	Acidobacteria_Gp4_family_incertae_sedis(100)	Gp4(100)	0	0	0	0	0	0	0	0	749	0	0	0	0	0	0	0	0	0	0	0	0	0	0	0	0	0	0	0	0	0	0	0	0	0	0	0	0	0	0	0	0	0	0
Otu00567	Bacteria(100)	Proteobacteria(100)	Gammaproteobacteria(100)	Enterobacteriales(100)	Enterobacteriaceae(100)	Enterobacteriaceae_unclassified(100)	0	0	0	0	0	0	0	0	0	0	0	0	0	0	0	0	0	0	0	0	0	0	0	0	0	0	0	0	0	0	0	0	0	0	0	0	0	0	0	0	0	0	0
Otu00406	Bacteria(100)	Firmicutes(100)	Bacilli(100)	Lactobacillales(100)	Aerococcaceae(100)	Aerococcus(100)	0	0	0	0	0	0	0	0	0	0	0	7	0	5	15	0	0	0	0	0	0	0	0	0	0	0	0	0	0	0	0	0	0	0	0	0	0	0	0	0	0	0	0
Otu00571	Bacteria(100)	Bacteroidetes(100)	Sphingobacteria(100)	Sphingobacteriales(100)	Chitinophagaceae(100)	Chitinophagaceae_unclassified(100)	0	0	0	0	0	0	0	0	0	0	0	0	0	0	0	0	0	0	0	0	0	0	0	0	0	0	0	0	0	0	0	0	0	0	0	0	0	0	0	0	0	0	0
Otu00572	Bacteria(100)	Proteobacteria(100)	Alphaproteobacteria(100)	Sphingomonadales(100)	Sphingomonadaceae(100)	Sphingomonas(100)	0	3	0	0	0	30	0	0	0	0	0	0	0	0	0	0	0	0	0	0	0	0	0	0	0	0	1	0	0	0	0	0	0	0	0	0	0	0	0	0	10	0	0
Otu00555	Bacteria(100)	Bacteroidetes(100)	Sphingobacteria(100)	Sphingobacteriales(100)	Chitinophagaceae(100)	Chitinophagaceae_unclassified(100)	0	13	10	0	3	0	0	0	0	0	0	0	0	0	0	0	0	0	0	0	0	0	0	0	0	0	0	0	0	0	0	0	0	0	0	6	0	15	0	0	3	0	196
Otu00574	Bacteria(100)	Planctomycetes(100)	Planctomycetacia(100)	Planctomycetales(100)	Planctomycetaceae(100)	Planctomycetaceae_unclassified(100)	0	0	0	0	0	0	0	0	0	0	0	0	0	0	0	0	0	0	0	0	0	0	0	0	0	0	0	0	0	0	0	0	0	0	0	0	0	0	0	0	0	0	0
Otu00577	Bacteria(100)	Proteobacteria(100)	Gammaproteobacteria(100)	Gammaproteobacteria_unclassified(100)	Gammaproteobacteria_unclassified(100)	Gammaproteobacteria_unclassified(100)	0	0	0	0	0	0	0	0	0	0	0	0	0	6	0	0	1	0	0	0	0	0	0	0	0	0	0	0	0	0	0	0	0	0	0	0	0	0	0	0	0	0	0
Otu00514	Bacteria(100)	Proteobacteria(100)	Alphaproteobacteria(100)	Rhizobiales(100)	Rhizobiales_unclassified(51)	Rhizobiales_unclassified(51)	0	0	0	0	2	0	17	1	2	0	0	0	9	0	0	1	0	0	0	0	0	1	0	0	0	0	0	0	0	0	0	0	0	0	0	0	0	73	160	0	7	0	0
Otu00573	Bacteria(100)	Firmicutes(100)	Bacilli(100)	Bacillales(100)	Paenibacillaceae_1(100)	Paenibacillus(100)	0	0	0	0	0	0	0	0	0	0	0	0	0	0	0	0	0	0	0	0	0	0	0	0	0	0	0	0	0	0	0	0	0	0	0	0	0	0	389	0	70	0	59
Otu00579	Bacteria(100)	Firmicutes(100)	Clostridia(100)	Clostridiales(100)	Ruminococcaceae(100)	Ruminococcaceae_unclassified(100)	0	0	0	0	0	0	0	0	0	0	0	0	0	0	0	0	0	0	0	0	0	0	0	0	0	0	0	0	0	0	0	0	0	0	0	0	0	0	0	0	0	0	0
Otu00576	Bacteria(100)	Actinobacteria(100)	Actinobacteria(100)	Actinomycetales(100)	Micromonosporaceae(100)	Micromonosporaceae_unclassified(100)	0	0	4	0	0	0	0	5	0	0	0	0	0	0	0	18	2	1	0	0	2	4	3	0	9	0	0	0	0	0	0	3	0	0	0	5	0	70	56	0	11	0	170
Otu00578	Bacteria(100)	Proteobacteria(65)	Proteobacteria_unclassified(65)	Proteobacteria_unclassified(65)	Proteobacteria_unclassified(65)	Proteobacteria_unclassified(65)	0	0	0	0	0	0	0	0	0	0	0	0	0	4	0	0	0	0	0	0	0	0	0	0	27	0	0	0	0	0	0	0	0	0	0	0	0	7	108	0	52	0	97
Otu00580	Bacteria(100)	Proteobacteria(100)	Alphaproteobacteria(100)	Rhizobiales(100)	Phyllobacteriaceae(99)	Phyllobacterium(88)	0	0	2	0	0	0	0	0	0	1	0	0	0	0	0	9	0	26	3	0	0	0	0	0	3	0	0	0	0	0	0	6	0	0	0	0	0	249	203	0	0	0	0
Otu00581	Bacteria(100)	Bacteroidetes(100)	Bacteroidetes_unclassified(100)	Bacteroidetes_unclassified(100)	Bacteroidetes_unclassified(100)	Bacteroidetes_unclassified(100)	0	0	0	0	0	0	0	0	0	0	0	0	0	0	0	0	0	0	0	0	0	0	0	0	0	0	0	0	0	0	0	0	0	0	0	0	0	0	0	0	0	0	0
Otu00582	Bacteria(100)	Proteobacteria(100)	Gammaproteobacteria(100)	Gammaproteobacteria_unclassified(100)	Gammaproteobacteria_unclassified(100)	Gammaproteobacteria_unclassified(100)	3	119	26	0	4	0	72	0	197	0	0	0	0	0	1	0	1	0	0	0	0	0	0	0	0	0	0	0	0	0	0	0	0	0	0	0	0	2	0	0	0	0	0
Otu00584	Bacteria(100)	Proteobacteria(100)	Gammaproteobacteria(100)	Alteromonadales(100)	Shewanellaceae(100)	Shewanella(100)	0	0	0	0	0	0	0	0	0	0	0	0	0	0	0	0	0	0	0	0	0	0	0	0	0	0	2	0	0	0	0	0	0	0	0	0	0	0	0	0	0	0	0
Otu00586	Bacteria(100)	Firmicutes(100)	Bacilli(100)	Lactobacillales(100)	Lactobacillales_unclassified(99)	Lactobacillales_unclassified(99)	0	0	0	0	0	0	0	0	7	0	0	0	6	0	0	0	6	0	0	5	0	1	0	0	0	0	0	0	0	1	43	85	38	81	35	396	4	1	0	0	6	0	1
Otu00588	Bacteria(100)	Actinobacteria(100)	Actinobacteria(100)	Coriobacteriales(100)	Coriobacteriaceae(100)	Coriobacteriaceae_unclassified(100)	0	0	0	0	0	0	0	0	0	0	0	0	0	0	0	0	0	0	0	0	0	0	0	0	0	0	10	0	0	0	0	0	0	0	0	0	0	0	0	0	0	0	0
Otu00589	Bacteria(100)	Bacteria_unclassified(100)	Bacteria_unclassified(100)	Bacteria_unclassified(100)	Bacteria_unclassified(100)	Bacteria_unclassified(100)	0	0	0	0	0	0	0	0	0	0	0	0	0	0	0	0	0	0	0	0	0	0	0	0	0	0	0	0	0	0	0	0	0	0	0	0	0	0	0	0	0	0	0
Otu00583	Bacteria(100)	Acidobacteria(100)	Acidobacteria_Gp1(100)	Acidobacteria_Gp1_order_incertae_sedis(100)	Acidobacteria_Gp1_family_incertae_sedis(100)	Gp1(100)	0	0	5	0	0	0	0	0	0	0	0	0	0	0	0	0	0	0	0	0	0	1	0	0	0	0	0	0	0	0	0	0	0	0	0	0	0	114	0	0	28	1	11
Otu00590	Bacteria(100)	Proteobacteria(100)	Deltaproteobacteria(100)	Myxococcales(100)	Myxococcales_unclassified(100)	Myxococcales_unclassified(100)	0	0	0	0	0	0	0	0	0	0	0	0	0	0	0	0	0	0	0	0	0	0	0	0	0	0	0	0	0	0	0	0	0	0	0	0	0	4	0	0	1	0	0
Otu00591	Bacteria(100)	Proteobacteria(100)	Gammaproteobacteria(100)	Pseudomonadales(100)	Moraxellaceae(100)	Enhydrobacter(83)	0	0	0	0	0	0	0	0	0	0	0	0	0	0	0	2	0	0	0	0	0	0	0	0	0	0	0	0	0	0	0	0	0	0	0	0	0	0	0	0	59	0	0
Otu00592	Bacteria(100)	Actinobacteria(100)	Actinobacteria(100)	Actinomycetales(100)	Actinomycetales_unclassified(98)	Actinomycetales_unclassified(98)	0	0	0	0	0	0	0	0	0	0	0	0	0	0	0	0	0	0	0	0	0	2	2	0	0	0	0	0	0	0	0	0	0	0	0	0	0	86	91	0	11	0	51
Otu00593	Bacteria(100)	Proteobacteria(100)	Proteobacteria_unclassified(100)	Proteobacteria_unclassified(100)	Proteobacteria_unclassified(100)	Proteobacteria_unclassified(100)	0	0	0	0	0	0	0	0	0	0	0	0	0	0	0	0	0	0	0	0	0	0	0	0	0	0	0	0	0	0	0	0	0	0	0	0	714	0	0	0	0	0	0
Otu00568	Bacteria(100)	Actinobacteria(100)	Actinobacteria(100)	Actinomycetales(100)	Dietziaceae(100)	Dietzia(100)	0	34	0	0	0	0	1	4	0	0	0	0	0	2	0	0	0	0	0	0	0	0	0	0	0	0	0	0	0	0	0	0	0	0	0	0	0	0	0	0	0	0	0
Otu00575	Bacteria(100)	Actinobacteria(100)	Actinobacteria(100)	Actinomycetales(100)	Mycobacteriaceae(100)	Mycobacterium(100)	0	0	0	0	0	2	0	7	0	0	0	0	11	3	0	0	0	0	0	0	0	0	1	0	0	0	0	0	0	0	0	0	0	0	0	0	0	9	17	0	70	0	504
Otu00594	Bacteria(100)	Bacteroidetes(100)	Sphingobacteria(100)	Sphingobacteriales(100)	Chitinophagaceae(100)	Chitinophagaceae_unclassified(100)	0	0	0	0	0	0	0	0	0	0	0	0	0	3	0	0	0	0	0	0	0	0	0	0	0	2	0	0	0	0	0	0	0	0	0	0	0	0	0	0	5	0	0
Otu00585	Bacteria(100)	Firmicutes(100)	Bacilli(100)	Lactobacillales(100)	Streptococcaceae(100)	Streptococcus(100)	1	0	0	0	0	0	0	0	0	0	0	0	0	2	0	1	1	0	0	0	0	0	0	0	0	0	0	0	0	0	0	0	0	0	0	0	0	0	0	0	9	146	6
Otu00597	Bacteria(100)	Actinobacteria(100)	Actinobacteria(100)	Coriobacteriales(100)	Coriobacteriaceae(100)	Enterorhabdus(100)	0	0	0	0	0	0	0	0	0	0	0	0	0	0	0	0	0	0	0	0	0	0	0	0	0	0	0	0	0	0	0	0	0	0	0	0	0	0	0	0	0	0	0
Otu00599	Bacteria(100)	Bacteria_unclassified(100)	Bacteria_unclassified(100)	Bacteria_unclassified(100)	Bacteria_unclassified(100)	Bacteria_unclassified(100)	0	0	0	0	0	0	0	0	0	0	0	0	0	0	0	0	0	0	0	0	0	0	0	0	0	0	0	0	0	0	0	0	0	0	0	0	0	0	0	0	0	0	0
Otu00600	Bacteria(100)	Planctomycetes(100)	Planctomycetacia(100)	Planctomycetales(100)	Planctomycetaceae(100)	Planctomycetaceae_unclassified(100)	0	69	0	0	0	0	0	0	0	0	0	0	0	11	0	0	0	8	0	0	0	1	9	0	1	0	0	0	0	0	0	0	0	0	0	0	0	92	0	0	0	0	0
Otu00596	Bacteria(100)	Acidobacteria(100)	Acidobacteria_Gp6(100)	Acidobacteria_Gp6_order_incertae_sedis(100)	Acidobacteria_Gp6_family_incertae_sedis(100)	Gp6(100)	0	0	0	0	0	0	1	0	0	14	0	0	171	30	0	0	0	0	0	0	0	0	0	0	0	0	0	0	0	0	0	0	0	1	0	0	0	0	0	0	8	0	0
Otu00602	Bacteria(100)	Bacteroidetes(100)	Bacteroidetes_unclassified(100)	Bacteroidetes_unclassified(100)	Bacteroidetes_unclassified(100)	Bacteroidetes_unclassified(100)	0	0	0	0	0	0	0	0	0	0	0	0	0	0	0	0	0	0	0	0	0	0	0	0	0	0	0	0	0	0	0	0	0	0	0	0	0	0	0	0	0	0	0
Otu00603	Bacteria(100)	Proteobacteria(100)	Epsilonproteobacteria(100)	Campylobacterales(100)	Helicobacteraceae(100)	Sulfurimonas(100)	0	0	0	0	0	0	0	0	0	0	0	0	0	0	0	0	1	0	0	0	0	0	0	0	0	0	0	0	0	0	0	0	0	0	0	0	0	0	0	0	0	0	0
Otu00598	Bacteria(100)	Proteobacteria(100)	Alphaproteobacteria(100)	Rhizobiales(100)	Rhizobiales_unclassified(81)	Rhizobiales_unclassified(81)	0	15	0	0	0	135	0	6	0	0	0	0	0	0	0	1	0	0	0	3	1	0	9	0	0	0	0	0	0	0	0	0	0	0	0	2	0	3	36	187	173	0	18
Otu00604	Bacteria(100)	Bacteria_unclassified(100)	Bacteria_unclassified(100)	Bacteria_unclassified(100)	Bacteria_unclassified(100)	Bacteria_unclassified(100)	0	0	0	0	0	0	0	0	0	0	0	0	0	0	0	0	0	0	0	0	0	3	0	0	0	0	0	0	0	0	0	0	0	0	0	0	0	138	385	0	44	0	34
Otu00606	Bacteria(100)	Firmicutes(100)	Clostridia(100)	Clostridiales(100)	Ruminococcaceae(100)	Ruminococcaceae_unclassified(100)	0	0	0	0	0	0	0	0	0	0	0	0	0	0	0	0	0	0	0	0	0	0	0	0	0	0	0	0	0	0	0	0	0	0	0	0	0	0	0	0	0	692	0
Otu00607	Bacteria(100)	Planctomycetes(100)	Planctomycetacia(100)	Planctomycetales(100)	Planctomycetaceae(100)	Singulisphaera(100)	0	0	0	0	0	0	0	0	0	0	0	0	0	0	0	0	0	0	0	0	4	0	17	0	0	0	0	0	0	0	0	0	0	0	0	0	0	149	192	0	40	0	0
Otu00608	Bacteria(100)	Verrucomicrobia(100)	Spartobacteria(100)	Spartobacteria_order_incertae_sedis(100)	Spartobacteria_family_incertae_sedis(100)	Spartobacteria_genera_incertae_sedis(100)	4	0	0	0	0	0	0	0	0	0	0	0	0	0	0	8	0	0	0	13	7	37	2	0	9	0	0	0	0	0	0	0	0	0	0	0	0	0	0	0	8	0	0
Otu00609	Bacteria(100)	Actinobacteria(100)	Actinobacteria(100)	Actinomycetales(100)	Intrasporangiaceae(100)	Intrasporangiaceae_unclassified(100)	0	0	0	0	0	0	0	0	0	0	0	0	0	0	0	4	0	0	0	0	0	0	0	0	0	0	0	0	0	0	0	0	0	0	0	0	0	68	3	0	37	0	8
Otu00611	Bacteria(100)	Firmicutes(100)	Erysipelotrichia(100)	Erysipelotrichales(100)	Erysipelotrichaceae(100)	Clostridium_XVIII(100)	0	0	0	0	0	0	0	0	0	0	0	0	0	0	0	0	0	0	0	0	0	0	0	0	0	0	0	0	0	0	0	0	0	0	0	0	0	0	0	0	0	0	0
Otu00612	Bacteria(100)	Acidobacteria(100)	Acidobacteria_Gp1(100)	Acidobacteria_Gp1_order_incertae_sedis(100)	Acidobacteria_Gp1_family_incertae_sedis(100)	Gp1(100)	0	0	0	0	0	0	0	0	0	0	0	0	0	0	0	0	0	0	0	0	0	3	0	0	1	0	0	0	0	0	0	0	0	0	0	0	0	0	11	0	0	0	146
Otu00613	Bacteria(100)	Proteobacteria(100)	Alphaproteobacteria(100)	Alphaproteobacteria_unclassified(100)	Alphaproteobacteria_unclassified(100)	Alphaproteobacteria_unclassified(100)	0	0	0	0	0	0	0	0	0	0	0	0	0	0	0	0	0	0	0	0	0	0	0	0	0	0	0	0	0	0	0	0	0	0	0	0	0	80	0	0	0	0	0
Otu00601	Bacteria(100)	Proteobacteria(100)	Alphaproteobacteria(100)	Rhizobiales(100)	Hyphomicrobiaceae(51)	Hyphomicrobiaceae_unclassified(51)	1	5	0	0	0	0	0	4	0	0	0	0	0	1	0	17	4	2	8	6	14	17	12	2	10	0	0	0	0	0	0	0	0	0	0	0	0	0	22	0	8	0	0
Otu00610	Bacteria(100)	Actinobacteria(100)	Actinobacteria(100)	Actinomycetales(100)	Thermomonosporaceae(95)	Actinoallomurus(90)	0	24	0	0	0	0	0	0	0	0	0	0	0	0	0	7	3	0	1	0	0	1	0	0	0	0	0	0	0	0	0	0	0	0	0	0	0	0	0	0	0	0	0
Otu00614	Bacteria(100)	Proteobacteria(100)	Deltaproteobacteria(100)	Myxococcales(100)	Myxococcales_unclassified(100)	Myxococcales_unclassified(100)	0	0	0	0	0	0	0	0	0	0	0	0	0	0	0	0	0	0	0	0	0	0	0	0	0	0	0	0	0	0	0	0	0	0	0	0	0	0	0	0	35	0	225
Otu00615	Bacteria(100)	Proteobacteria(100)	Alphaproteobacteria(100)	Rhizobiales(100)	Methylobacteriaceae(100)	Methylobacterium(100)	0	0	0	0	0	15	0	0	0	0	0	0	0	0	0	0	0	0	0	0	0	0	0	0	0	0	0	0	0	0	0	0	0	0	0	0	0	110	204	2	77	0	1
Otu00616	Bacteria(100)	Actinobacteria(100)	Actinobacteria(100)	Actinomycetales(100)	Microbacteriaceae(100)	Leucobacter(94)	0	0	0	0	0	0	0	0	0	0	0	0	0	0	0	0	0	0	3	0	0	0	0	0	0	0	0	0	0	0	0	17	1	0	0	47	0	0	0	0	0	0	0
Otu00617	Bacteria(100)	Bacteria_unclassified(100)	Bacteria_unclassified(100)	Bacteria_unclassified(100)	Bacteria_unclassified(100)	Bacteria_unclassified(100)	0	0	0	0	0	0	0	0	0	0	0	0	0	0	0	0	0	0	0	0	0	0	0	0	0	0	0	0	0	0	0	0	0	0	0	0	0	0	0	0	0	0	0
Otu00618	Bacteria(100)	Acidobacteria(100)	Acidobacteria_Gp3(100)	Acidobacteria_Gp3_order_incertae_sedis(100)	Acidobacteria_Gp3_family_incertae_sedis(100)	Gp3(100)	0	0	0	0	0	0	0	0	0	0	0	0	0	0	0	0	0	0	0	0	0	0	0	0	14	0	0	0	0	0	0	0	0	0	0	0	0	4	0	0	1	0	0
Otu00619	Bacteria(100)	Bacteroidetes(100)	Sphingobacteria(100)	Sphingobacteriales(100)	Chitinophagaceae(100)	Chitinophagaceae_unclassified(100)	0	0	0	0	0	0	0	0	0	0	0	0	0	0	0	0	0	0	0	0	0	0	0	0	0	0	0	0	0	0	0	0	0	0	0	0	0	0	0	0	0	0	0
Otu00605	Bacteria(100)	Actinobacteria(100)	Actinobacteria(100)	Actinomycetales(100)	Micromonosporaceae(100)	Micromonosporaceae_unclassified(93)	0	25	0	0	0	1	0	0	0	0	0	0	0	0	0	9	5	2	0	0	5	12	2	5	1	0	0	0	0	0	0	2	7	0	0	0	0	93	111	130	50	0	21
Otu00620	Bacteria(100)	Firmicutes(100)	Firmicutes_unclassified(100)	Firmicutes_unclassified(100)	Firmicutes_unclassified(100)	Firmicutes_unclassified(100)	0	0	0	0	0	0	0	0	0	0	0	0	0	0	0	0	0	0	0	0	0	0	0	0	0	0	0	0	0	0	0	0	0	0	0	0	0	0	0	1	0	0	0
Otu00237	Bacteria(100)	Proteobacteria(100)	Alphaproteobacteria(100)	Rhodobacterales(100)	Rhodobacteraceae(100)	Rhodobacteraceae_unclassified(98)	0	3	1	0	0	0	1	0	0	0	0	0	15	0	0	3	0	4	0	0	0	0	8	0	0	0	0	0	0	0	0	0	0	0	0	2	0	43	0	0	16	0	0
Otu00621	Bacteria(100)	Firmicutes(100)	Clostridia(100)	Clostridiales(100)	Lachnospiraceae(100)	Lachnospiraceae_unclassified(100)	0	0	0	0	0	0	0	0	0	0	0	0	0	2	1	1	0	0	0	3	0	0	0	0	0	3	0	0	0	0	0	0	0	0	0	0	0	0	0	1	0	0	0
Otu00417	Bacteria(100)	Bacteroidetes(100)	Flavobacteria(100)	Flavobacteriales(100)	Flavobacteriaceae(100)	Chryseobacterium(100)	5	0	0	0	10	0	0	0	0	0	0	29	0	0	75	0	0	0	0	0	0	0	0	0	0	1	0	0	0	0	0	0	0	0	0	0	0	33	0	0	0	0	0
Otu00625	Bacteria(100)	Bacteroidetes(100)	Bacteroidia(100)	Bacteroidales(100)	Porphyromonadaceae(100)	Parabacteroides(100)	0	0	0	0	0	0	0	0	0	0	0	0	0	0	0	0	0	0	0	0	0	0	0	0	0	0	0	0	0	0	0	0	0	0	0	0	0	0	0	0	0	0	0
Otu00626	Bacteria(100)	Bacteroidetes(100)	Bacteroidia(100)	Bacteroidales(100)	Bacteroidaceae(100)	Bacteroides(100)	0	0	0	0	0	0	0	0	0	0	0	0	0	0	0	3	0	0	0	0	0	0	0	0	0	0	0	0	0	0	0	0	0	0	0	0	0	0	0	0	0	0	0
Otu00627	Bacteria(100)	Firmicutes(100)	Clostridia(100)	Clostridiales(100)	Clostridiales_Incertae_Sedis_XI(100)	Peptoniphilus(100)	0	0	0	0	0	0	0	0	0	0	0	0	0	0	0	0	0	0	0	0	0	0	0	0	0	0	0	0	0	0	0	0	0	0	0	0	0	0	0	0	0	0	0
Otu00628	Bacteria(100)	Bacteria_unclassified(100)	Bacteria_unclassified(100)	Bacteria_unclassified(100)	Bacteria_unclassified(100)	Bacteria_unclassified(100)	0	0	0	0	0	0	0	0	0	0	0	0	0	0	0	0	0	0	0	0	0	0	0	0	0	0	0	0	0	0	0	0	0	0	0	0	0	0	0	0	0	0	0
Otu00624	Bacteria(100)	Proteobacteria(100)	Alphaproteobacteria(100)	Rhodospirillales(100)	Acetobacteraceae(100)	Acetobacteraceae_unclassified(59)	0	0	0	0	0	0	2	0	0	0	0	0	0	0	0	0	0	0	0	0	0	0	0	0	0	0	0	0	0	0	0	0	0	0	0	0	0	278	36	0	2	0	0
Otu00595	Bacteria(100)	Proteobacteria(100)	Proteobacteria_unclassified(79)	Proteobacteria_unclassified(79)	Proteobacteria_unclassified(79)	Proteobacteria_unclassified(79)	0	0	0	0	0	0	0	0	0	0	0	0	0	7	0	0	0	0	11	0	0	0	0	0	0	0	0	0	0	0	0	0	0	0	0	0	0	0	0	0	0	481	0
Otu00631	Bacteria(100)	Actinobacteria(100)	Actinobacteria(100)	Actinomycetales(100)	Nocardioidaceae(100)	Nocardioides(96)	0	0	0	0	0	0	0	0	0	0	0	0	0	0	0	1	0	0	0	0	0	0	0	0	0	0	0	0	0	0	0	11	2	0	0	0	0	47	48	0	17	0	41
Otu00632	Bacteria(100)	Bacteroidetes(100)	Bacteroidia(100)	Bacteroidales(100)	Prevotellaceae(100)	Prevotella(100)	0	0	0	0	0	0	0	0	0	0	0	0	0	0	0	0	0	0	0	0	0	0	0	0	0	0	0	0	0	0	0	0	0	0	0	0	0	0	0	0	17	0	0
Otu00633	Bacteria(100)	Acidobacteria(100)	Acidobacteria_Gp3(100)	Acidobacteria_Gp3_order_incertae_sedis(100)	Acidobacteria_Gp3_family_incertae_sedis(100)	Gp3(100)	0	0	0	0	0	0	0	0	0	0	0	0	0	0	0	0	0	0	0	0	0	0	0	0	0	0	0	0	0	0	0	0	0	0	0	0	0	0	0	0	3	0	0
Otu00570	Bacteria(100)	Bacteroidetes(100)	Flavobacteria(100)	Flavobacteriales(100)	Flavobacteriaceae(100)	Flavobacteriaceae_unclassified(100)	0	0	0	2	0	0	0	0	547	0	0	0	0	0	0	0	0	0	0	0	0	0	0	0	0	0	0	0	0	0	0	0	0	0	0	0	0	0	0	0	0	0	0
Otu00634	Bacteria(100)	Actinobacteria(100)	Actinobacteria(100)	Coriobacteriales(100)	Coriobacteriaceae(100)	Coriobacteriaceae_unclassified(100)	0	0	0	0	0	0	0	0	0	0	0	0	0	0	0	0	0	0	0	0	0	0	0	0	0	0	0	0	0	0	0	0	0	0	0	0	0	0	0	0	0	0	0
Otu00635	Bacteria(100)	Firmicutes(100)	Firmicutes_unclassified(100)	Firmicutes_unclassified(100)	Firmicutes_unclassified(100)	Firmicutes_unclassified(100)	0	0	0	0	0	0	0	0	0	0	0	0	0	0	0	0	0	0	0	0	0	0	0	0	0	0	0	0	0	0	0	0	0	0	0	0	0	0	0	0	0	0	0
Otu00637	Bacteria(100)	Acidobacteria(100)	Acidobacteria_Gp1(100)	Acidobacteria_Gp1_order_incertae_sedis(100)	Acidobacteria_Gp1_family_incertae_sedis(100)	Gp1(100)	0	0	0	0	0	0	0	0	0	0	0	0	0	0	0	0	0	0	0	0	0	2	0	0	0	0	0	0	0	0	0	0	0	0	0	0	0	142	0	0	15	0	179
Otu00636	Bacteria(100)	Proteobacteria(100)	Alphaproteobacteria(100)	Alphaproteobacteria_unclassified(63)	Alphaproteobacteria_unclassified(63)	Alphaproteobacteria_unclassified(63)	1	0	4	0	7	0	0	0	0	0	0	0	0	0	0	0	0	0	0	0	0	0	3	0	3	0	0	0	0	0	0	0	0	0	0	2	56	57	27	0	31	0	0
Otu00640	Bacteria(100)	Proteobacteria(100)	Deltaproteobacteria(100)	Myxococcales(100)	Polyangiaceae(100)	Byssovorax(53)	0	2	0	0	0	0	0	11	0	0	0	0	0	0	0	26	4	0	0	9	2	26	2	0	6	0	0	0	0	0	0	0	0	0	0	0	0	29	70	0	48	0	11
Otu00643	Bacteria(100)	Acidobacteria(100)	Acidobacteria_Gp3(100)	Acidobacteria_Gp3_order_incertae_sedis(100)	Acidobacteria_Gp3_family_incertae_sedis(100)	Gp3(100)	0	0	0	0	0	0	0	0	0	0	0	0	0	0	0	0	0	0	0	0	0	0	0	0	0	0	0	0	0	0	0	0	0	0	0	0	0	0	0	0	0	0	0
Otu00623	Bacteria(100)	Bacteroidetes(100)	Flavobacteria(100)	Flavobacteriales(100)	Flavobacteriaceae(100)	Flavobacterium(100)	5	4	4	0	8	0	2	0	0	0	0	0	0	0	0	0	0	0	0	0	0	0	0	0	0	0	0	0	0	0	0	0	0	0	0	0	0	0	0	0	0	0	0
Otu00644	Bacteria(100)	Actinobacteria(100)	Actinobacteria(100)	Solirubrobacterales(100)	Conexibacteraceae(100)	Conexibacter(100)	0	0	2	0	0	0	0	0	0	0	0	0	0	0	0	1	0	0	0	0	0	1	0	0	0	0	0	0	0	0	0	0	0	0	0	0	0	81	75	0	59	0	0
Otu00645	Bacteria(100)	Firmicutes(100)	Clostridia(100)	Clostridiales(100)	Ruminococcaceae(100)	Ruminococcaceae_unclassified(100)	0	0	0	0	0	0	0	0	0	0	0	0	0	0	0	0	0	0	0	0	0	0	0	0	0	0	0	0	0	0	0	0	0	0	0	0	0	0	0	0	0	616	0
Otu00646	Bacteria(100)	Proteobacteria(100)	Alphaproteobacteria(100)	Caulobacterales(100)	Caulobacteraceae(100)	Phenylobacterium(99)	0	0	0	0	0	0	0	0	0	0	0	0	0	0	85	0	0	0	0	0	0	1	0	1	2	0	0	0	0	0	0	0	0	0	0	0	0	26	1	0	4	203	18
Otu00629	Bacteria(100)	Proteobacteria(100)	Alphaproteobacteria(100)	Sphingomonadales(100)	Sphingomonadaceae(100)	Sphingomonadaceae_unclassified(100)	0	22	0	4	0	0	3	0	0	0	0	0	0	8	0	0	0	0	0	0	0	0	0	0	0	0	0	0	0	0	0	0	0	0	0	0	0	0	8	0	2	0	58
Otu00648	Bacteria(100)	Firmicutes(100)	Bacilli(100)	Lactobacillales(100)	Lactobacillaceae(100)	Lactobacillaceae_unclassified(99)	0	4	7	0	0	0	0	0	0	0	0	0	0	0	0	0	0	0	0	0	0	0	0	0	0	0	0	0	0	0	0	0	0	0	0	0	0	0	601	10	0	0	0
Otu00642	Bacteria(100)	Bacteria_unclassified(100)	Bacteria_unclassified(100)	Bacteria_unclassified(100)	Bacteria_unclassified(100)	Bacteria_unclassified(100)	0	0	0	0	0	0	0	0	0	0	0	0	1	5	0	0	0	0	0	0	0	0	11	0	0	0	0	0	0	0	0	0	0	0	0	0	0	0	0	0	0	0	0
Otu00650	Bacteria(100)	Firmicutes(100)	Clostridia(100)	Clostridiales(100)	Clostridiales_unclassified(100)	Clostridiales_unclassified(100)	0	0	0	0	0	0	0	0	0	0	0	0	0	0	0	0	0	0	0	0	0	0	0	0	0	0	0	0	0	0	0	0	0	0	0	0	0	497	86	0	18	0	26
Otu00651	Bacteria(100)	Firmicutes(100)	Bacilli(100)	Lactobacillales(100)	Lactobacillales_unclassified(100)	Lactobacillales_unclassified(100)	20	1	7	0	14	84	0	0	0	0	0	0	0	0	0	0	1	0	30	0	0	1	3	0	0	0	0	0	0	0	0	7	0	0	0	0	0	122	0	0	10	0	0
Otu00652	Bacteria(100)	Bacteria_unclassified(100)	Bacteria_unclassified(100)	Bacteria_unclassified(100)	Bacteria_unclassified(100)	Bacteria_unclassified(100)	0	0	0	0	0	0	0	0	0	0	0	0	0	0	0	0	0	0	0	0	0	0	0	0	0	0	0	0	0	0	0	0	0	0	0	0	0	0	0	0	0	0	0
Otu00653	Bacteria(100)	Bacteria_unclassified(100)	Bacteria_unclassified(100)	Bacteria_unclassified(100)	Bacteria_unclassified(100)	Bacteria_unclassified(100)	0	0	0	0	0	0	0	0	0	0	0	0	0	0	0	0	0	0	0	0	0	0	0	0	0	0	0	0	0	0	0	0	0	0	0	0	0	0	0	0	0	0	0
Otu00410	Bacteria(100)	Proteobacteria(100)	Alphaproteobacteria(70)	Rhizobiales(59)	Rhizobiales_unclassified(59)	Rhizobiales_unclassified(59)	0	0	0	0	0	0	0	0	0	0	0	0	0	0	0	0	0	0	0	0	0	0	1	0	7	0	0	0	0	0	0	0	0	0	0	0	0	0	0	0	0	0	0
Otu00647	Bacteria(100)	Firmicutes(100)	Bacilli(100)	Lactobacillales(100)	Lactobacillales_unclassified(98)	Lactobacillales_unclassified(98)	0	1	0	0	1	1	0	0	17	0	0	0	8	0	0	3	1	3	2	1	1	2	2	1	4	2	6	0	0	0	62	79	61	74	47	146	11	3	0	0	9	0	5
Otu00649	Bacteria(100)	Proteobacteria(100)	Gammaproteobacteria(100)	Enterobacteriales(100)	Enterobacteriaceae(100)	Enterobacteriaceae_unclassified(100)	0	0	0	0	0	0	0	0	0	0	0	0	0	0	0	0	0	0	0	0	0	0	0	0	0	0	0	0	0	0	0	0	0	0	3	0	0	1	0	0	4	0	0
Otu00654	Bacteria(100)	Proteobacteria(100)	Gammaproteobacteria(100)	Pseudomonadales(100)	Pseudomonadaceae(100)	Pseudomonas(84)	0	0	0	0	0	0	1	0	0	249	0	0	0	0	0	0	0	0	0	0	0	0	0	0	0	0	167	0	0	0	0	0	0	0	0	0	0	1	4	0	0	0	0
Otu00656	Bacteria(100)	Actinobacteria(100)	Actinobacteria(100)	Actinomycetales(100)	Intrasporangiaceae(100)	Phycicoccus(100)	0	0	0	0	0	0	0	0	0	0	0	0	0	0	0	7	7	11	0	0	0	0	0	0	2	0	0	0	0	0	0	0	0	0	0	0	0	39	0	0	0	0	0
Otu00657	Bacteria(100)	TM7(100)	TM7_class_incertae_sedis(100)	TM7_order_incertae_sedis(100)	TM7_family_incertae_sedis(100)	TM7_genus_incertae_sedis(100)	0	0	0	0	0	0	0	0	0	0	0	0	0	0	0	0	0	0	0	0	0	0	0	0	0	0	0	0	0	0	0	0	0	0	0	0	0	0	0	0	0	0	0
Otu00659	Bacteria(100)	Actinobacteria(100)	Actinobacteria(100)	Actinomycetales(100)	Actinomycetales_unclassified(100)	Actinomycetales_unclassified(100)	0	0	0	0	0	0	0	0	0	0	0	0	0	0	0	0	0	0	0	0	0	0	0	0	0	0	0	0	0	0	0	0	0	0	0	0	0	0	0	0	0	0	0
Otu00658	Bacteria(100)	Verrucomicrobia(100)	Spartobacteria(100)	Spartobacteria_order_incertae_sedis(100)	Spartobacteria_family_incertae_sedis(100)	Spartobacteria_family_incertae_sedis_unclassified(100)	0	0	0	0	0	0	0	0	0	0	0	0	0	0	0	0	0	0	0	0	0	0	0	0	0	0	0	0	0	0	0	0	0	0	0	0	0	0	0	0	0	0	0
Otu00660	Bacteria(100)	Bacteroidetes(100)	Sphingobacteria(100)	Sphingobacteriales(100)	Chitinophagaceae(100)	Chitinophagaceae_unclassified(100)	0	0	0	0	0	0	0	0	0	0	0	0	0	0	0	0	0	0	0	0	0	0	0	0	0	0	0	0	0	0	0	0	0	0	0	0	0	0	0	0	0	0	0
Otu00663	Bacteria(100)	Acidobacteria(100)	Acidobacteria_Gp2(100)	Acidobacteria_Gp2_order_incertae_sedis(100)	Acidobacteria_Gp2_family_incertae_sedis(100)	Gp2(100)	0	0	6	0	0	0	0	0	0	0	0	0	0	0	0	0	0	0	0	0	0	0	0	0	5	0	0	0	0	0	0	0	0	0	0	0	0	37	0	0	0	0	0
Otu00622	Bacteria(100)	Verrucomicrobia(100)	Spartobacteria(100)	Spartobacteria_order_incertae_sedis(100)	Spartobacteria_family_incertae_sedis(100)	Spartobacteria_genera_incertae_sedis(100)	0	8	0	0	0	0	0	2	0	0	0	0	0	0	0	0	0	9	0	0	0	1	0	0	0	0	0	0	0	0	0	0	0	0	0	0	0	0	0	0	0	0	0
Otu00664	Bacteria(100)	Actinobacteria(100)	Actinobacteria(100)	Actinomycetales(100)	Micromonosporaceae(100)	Dactylosporangium(94)	0	0	0	0	0	0	0	0	0	0	0	0	0	0	0	13	0	0	0	12	0	0	0	0	5	0	0	0	0	0	0	0	0	0	0	0	0	278	66	14	21	0	0
Otu00665	Bacteria(100)	OD1(100)	OD1_class_incertae_sedis(100)	OD1_order_incertae_sedis(100)	OD1_family_incertae_sedis(100)	OD1_genus_incertae_sedis(100)	0	0	0	0	0	0	0	0	0	0	0	0	0	0	0	0	0	0	0	0	0	0	0	0	0	0	0	0	0	0	0	0	0	0	0	0	0	0	0	0	0	0	0
Otu00661	Bacteria(100)	Proteobacteria(100)	Alphaproteobacteria(100)	Sphingomonadales(100)	Sphingomonadaceae(100)	Sphingomonas(91)	1	0	0	0	0	0	6	0	346	0	0	0	0	0	0	0	0	0	0	0	0	2	0	0	0	0	0	0	0	0	0	0	0	0	0	0	0	123	0	0	36	0	0
Otu00666	Bacteria(100)	Planctomycetes(100)	Planctomycetacia(100)	Planctomycetales(100)	Planctomycetaceae(100)	Planctomycetaceae_unclassified(100)	0	0	0	0	0	0	0	0	603	0	0	0	0	0	0	0	0	0	0	0	0	0	0	0	0	0	0	0	0	0	0	0	0	0	0	0	0	0	0	0	0	0	0
Otu00667	Bacteria(100)	Planctomycetes(100)	Planctomycetacia(100)	Planctomycetales(100)	Planctomycetaceae(100)	Planctomycetaceae_unclassified(100)	0	0	0	0	0	0	0	0	0	0	0	0	0	2	0	1	0	0	0	0	0	2	6	0	4	0	0	0	0	0	0	0	0	0	0	0	0	14	72	0	27	0	0
Otu00669	Bacteria(100)	Bacteroidetes(100)	Bacteroidetes_unclassified(100)	Bacteroidetes_unclassified(100)	Bacteroidetes_unclassified(100)	Bacteroidetes_unclassified(100)	0	0	0	0	0	0	1	0	0	0	0	0	0	15	21	0	0	0	0	0	0	0	0	0	0	0	0	0	0	0	0	0	0	0	0	0	0	0	0	0	0	0	0
Otu00670	Bacteria(100)	Proteobacteria(100)	Gammaproteobacteria(100)	Gammaproteobacteria_unclassified(100)	Gammaproteobacteria_unclassified(100)	Gammaproteobacteria_unclassified(100)	0	0	0	0	0	0	0	0	0	0	0	0	0	0	0	0	0	0	0	0	0	0	0	0	0	0	0	0	0	0	0	0	0	0	0	0	0	0	0	1	0	0	0
Otu00671	Bacteria(100)	Firmicutes(100)	Clostridia(100)	Clostridiales(100)	Peptostreptococcaceae(100)	Clostridium_XI(100)	0	0	0	23	0	0	0	0	0	0	0	0	0	0	0	0	0	0	0	0	0	0	0	0	0	0	0	0	0	2	0	0	0	0	0	0	0	0	0	0	0	0	0
Otu00672	Bacteria(100)	Bacteroidetes(100)	Sphingobacteria(100)	Sphingobacteriales(100)	Sphingobacteriaceae(100)	Mucilaginibacter(71)	0	0	0	0	0	0	0	0	0	0	0	0	0	0	0	0	0	0	2	0	0	0	0	1	0	0	0	0	0	0	0	0	0	0	0	0	0	77	0	0	33	0	5
Otu00639	Bacteria(100)	Planctomycetes(100)	Planctomycetacia(100)	Planctomycetales(100)	Planctomycetaceae(100)	Singulisphaera(100)	0	0	0	0	0	0	0	0	0	0	0	0	0	0	0	0	0	0	0	0	0	0	0	0	0	0	0	0	0	0	0	0	0	0	0	0	0	439	20	0	100	0	17
Otu00673	Bacteria(100)	Actinobacteria(100)	Actinobacteria(100)	Actinomycetales(100)	Nocardiaceae(100)	Nocardiaceae_unclassified(100)	0	5	0	0	0	0	0	0	0	0	0	0	0	0	0	0	0	0	0	0	0	0	7	0	0	0	0	0	0	0	0	0	0	0	0	1	0	5	189	0	65	0	174
Otu00674	Bacteria(100)	Proteobacteria(100)	Gammaproteobacteria(100)	Oceanospirillales(100)	Halomonadaceae(100)	Salinicola(100)	0	0	0	0	0	0	0	0	0	0	0	0	0	0	0	0	0	0	0	0	0	0	0	0	0	0	0	0	0	0	0	0	0	0	0	0	0	0	0	1	0	0	0
Otu00675	Bacteria(100)	Tenericutes(100)	Mollicutes(100)	Acholeplasmatales(100)	Acholeplasmataceae(100)	Acholeplasma(100)	0	0	0	0	0	0	0	0	0	0	0	0	0	0	0	0	0	0	0	0	0	0	0	0	0	0	0	0	0	0	0	0	0	0	0	0	0	0	0	0	0	0	0
Otu00587	Bacteria(100)	Proteobacteria(100)	Gammaproteobacteria(100)	Cardiobacteriales(100)	Cardiobacteriaceae(100)	Suttonella(100)	1	0	0	0	0	0	0	0	0	0	0	0	0	5	1	0	0	0	0	0	0	0	0	0	0	0	0	0	0	0	0	0	0	0	0	0	0	0	0	0	0	0	0
Otu00676	Bacteria(100)	Deinococcus-Thermus(100)	Deinococci(100)	Deinococcales(100)	Deinococcaceae(100)	Deinococcus(100)	0	0	0	0	0	0	0	0	0	0	0	0	0	0	0	0	0	0	0	0	0	0	0	0	0	0	0	0	0	0	0	0	0	0	0	0	0	35	25	0	251	0	252
Otu00677	Bacteria(100)	Firmicutes(100)	Bacilli(100)	Lactobacillales(100)	Carnobacteriaceae(100)	Atopostipes(100)	0	0	0	0	0	0	0	0	0	0	0	0	0	0	0	0	0	0	0	0	0	0	0	0	0	0	90	0	0	0	0	0	0	0	0	0	0	0	0	0	0	0	0
Otu00662	Bacteria(100)	Firmicutes(100)	Bacilli(100)	Bacillales(100)	Planococcaceae(88)	Lysinibacillus(64)	1	4	0	0	0	0	0	6	0	0	0	0	0	0	5	0	0	0	0	0	0	0	0	0	0	0	32	0	0	0	0	0	0	0	0	0	0	6	0	0	13	0	0
Otu00679	Bacteria(100)	Bacteroidetes(100)	Flavobacteria(100)	Flavobacteriales(100)	Flavobacteriaceae(100)	Flavobacteriaceae_unclassified(100)	0	0	0	0	0	0	0	0	0	0	0	0	0	0	0	0	0	0	0	0	0	0	0	0	0	0	0	0	0	0	0	0	0	0	0	0	0	0	0	0	0	0	0
Otu00681	Bacteria(100)	Actinobacteria(100)	Actinobacteria(100)	Actinomycetales(100)	Actinomycetales_unclassified(100)	Actinomycetales_unclassified(100)	0	12	0	0	0	0	0	0	0	0	0	0	0	0	0	2	0	0	6	0	0	2	2	0	2	0	0	0	0	0	0	0	0	0	0	0	5	37	0	0	65	188	1
Otu00683	Bacteria(100)	Firmicutes(100)	Clostridia(100)	Clostridiales(100)	Clostridiales_Incertae_Sedis_XI(100)	Anaerococcus(100)	0	0	1	1	0	0	0	0	2	0	0	0	58	0	0	0	0	0	0	0	0	0	0	0	0	0	0	0	0	0	0	0	0	0	0	0	0	0	0	0	0	0	0
Otu00684	Bacteria(100)	Proteobacteria(100)	Alphaproteobacteria(100)	Rhodospirillales(100)	Acetobacteraceae(100)	Acetobacteraceae_unclassified(86)	0	0	0	0	0	0	0	0	0	0	0	0	0	0	0	0	0	0	0	0	0	3	0	0	1	0	0	0	0	0	0	0	0	0	0	0	0	1	79	0	100	0	69
Otu00685	Bacteria(100)	Verrucomicrobia(100)	Spartobacteria(100)	Spartobacteria_order_incertae_sedis(100)	Spartobacteria_family_incertae_sedis(100)	Spartobacteria_genera_incertae_sedis(100)	0	0	0	0	0	0	0	0	0	0	0	0	0	0	0	0	0	0	0	0	0	0	0	0	0	0	0	0	0	0	0	0	0	0	0	0	0	0	0	0	0	0	0
Otu00686	Bacteria(100)	Proteobacteria(100)	Betaproteobacteria(100)	Burkholderiales(100)	Burkholderiales_unclassified(85)	Burkholderiales_unclassified(85)	0	8	1	0	0	0	0	0	62	0	0	0	0	0	0	0	0	0	0	1	0	0	0	0	4	0	0	0	0	0	0	0	0	0	0	0	0	0	4	0	10	0	0
Otu00688	Bacteria(100)	Acidobacteria(100)	Acidobacteria_Gp4(100)	Acidobacteria_Gp4_order_incertae_sedis(100)	Acidobacteria_Gp4_family_incertae_sedis(100)	Gp4(100)	0	0	0	0	0	0	0	0	570	0	0	0	0	0	0	0	0	0	0	0	0	0	0	0	0	0	0	0	0	0	0	0	0	0	0	0	0	0	0	0	0	0	0
Otu00687	Bacteria(100)	Actinobacteria(100)	Actinobacteria(100)	Solirubrobacterales(100)	Solirubrobacterales_unclassified(63)	Solirubrobacterales_unclassified(63)	0	0	0	0	0	0	0	0	0	0	0	0	0	0	0	6	0	0	0	0	0	0	0	0	0	0	0	0	0	0	0	0	0	0	0	1	0	0	35	0	41	0	244
Otu00682	Bacteria(100)	Firmicutes(100)	Firmicutes_unclassified(100)	Firmicutes_unclassified(100)	Firmicutes_unclassified(100)	Firmicutes_unclassified(100)	0	0	0	0	0	0	0	0	0	0	0	0	0	0	0	0	0	0	0	0	0	0	1	0	0	0	0	0	0	0	0	0	0	0	0	0	0	0	0	0	0	0	0
Otu00689	Bacteria(100)	Proteobacteria(100)	Alphaproteobacteria(100)	Rhodospirillales(100)	Acetobacteraceae(100)	Acetobacteraceae_unclassified(100)	0	0	0	0	0	0	0	0	0	0	0	0	0	0	0	0	0	0	0	0	0	0	0	0	0	0	0	0	0	0	0	0	0	0	0	0	0	3	0	0	18	549	0
Otu00680	Bacteria(100)	Actinobacteria(100)	Actinobacteria(100)	Actinomycetales(100)	Nocardioidaceae(100)	Nocardioides(100)	1	2	0	0	0	0	0	0	0	0	0	0	0	1	0	2	1	0	0	0	2	0	0	0	0	0	0	0	0	0	0	1	0	0	0	2	0	36	0	0	55	0	87
Otu00692	Bacteria(100)	Proteobacteria(100)	Betaproteobacteria(100)	Betaproteobacteria_unclassified(88)	Betaproteobacteria_unclassified(88)	Betaproteobacteria_unclassified(88)	0	0	0	0	0	0	0	0	0	0	0	0	0	0	0	0	0	0	0	0	0	0	0	0	0	1	0	0	0	0	0	0	0	0	0	0	0	0	0	0	0	0	0
Otu00693	Bacteria(100)	Planctomycetes(100)	Planctomycetacia(100)	Planctomycetales(100)	Planctomycetaceae(100)	Planctomycetaceae_unclassified(100)	0	0	0	0	0	0	0	0	0	0	0	0	0	0	0	0	0	0	0	0	0	0	0	0	0	0	0	0	0	0	0	0	0	0	0	0	0	1	68	0	409	0	0
Otu00694	Bacteria(100)	Firmicutes(100)	Bacilli(100)	Bacillales(100)	Planococcaceae(100)	Ureibacillus(100)	0	0	0	0	0	0	0	0	0	0	0	0	0	0	0	0	0	0	0	0	0	0	0	0	0	0	0	0	0	0	0	0	0	0	0	0	0	0	0	0	0	0	0
Otu00695	Bacteria(100)	Proteobacteria(100)	Alphaproteobacteria(100)	Caulobacterales(88)	Caulobacteraceae(88)	Caulobacteraceae_unclassified(62)	0	10	0	0	0	0	0	0	0	0	0	0	0	4	0	0	0	0	0	0	0	0	0	0	0	0	0	0	0	0	0	0	0	0	0	0	0	219	0	0	81	0	136
Otu00696	Bacteria(100)	Bacteria_unclassified(84)	Bacteria_unclassified(84)	Bacteria_unclassified(84)	Bacteria_unclassified(84)	Bacteria_unclassified(84)	0	0	0	0	0	0	0	1	0	0	0	0	0	0	0	0	0	0	0	0	2	8	0	0	9	0	0	0	0	0	0	0	0	0	0	0	61	41	150	0	53	0	168
Otu00690	Bacteria(100)	Proteobacteria(100)	Alphaproteobacteria(100)	Rhodobacterales(100)	Rhodobacteraceae(100)	Paracoccus(94)	0	0	0	0	0	0	0	0	0	0	0	0	0	0	0	0	0	0	0	0	0	0	0	0	0	2	0	0	0	0	0	17	0	0	0	0	0	3	0	0	1	0	0
Otu00697	Bacteria(100)	Actinobacteria(100)	Actinobacteria(100)	Actinomycetales(100)	Actinomycetales_unclassified(100)	Actinomycetales_unclassified(100)	0	274	0	0	0	0	0	0	0	0	0	5	0	0	0	0	0	0	0	0	0	0	0	0	0	0	0	0	0	0	0	0	0	0	0	0	0	0	0	0	0	0	0
Otu00698	Bacteria(100)	Firmicutes(100)	Clostridia(100)	Clostridiales(100)	Clostridiaceae_1(100)	Clostridium_sensu_stricto(100)	3	5	0	0	0	0	4	0	0	0	0	0	0	0	0	0	0	0	0	0	0	0	0	0	0	0	0	0	0	0	0	0	0	0	0	0	0	0	0	0	0	0	0
Otu00699	Bacteria(100)	Proteobacteria(100)	Gammaproteobacteria(100)	Gammaproteobacteria_unclassified(100)	Gammaproteobacteria_unclassified(100)	Gammaproteobacteria_unclassified(100)	0	0	0	0	0	0	0	0	0	0	0	0	0	0	0	0	0	0	0	0	0	0	0	0	0	0	0	0	0	0	0	0	0	0	0	0	0	51	495	0	18	0	0
Otu00700	Bacteria(100)	Bacteria_unclassified(100)	Bacteria_unclassified(100)	Bacteria_unclassified(100)	Bacteria_unclassified(100)	Bacteria_unclassified(100)	0	0	0	0	0	0	0	0	564	0	0	0	0	0	0	0	0	0	0	0	0	0	0	0	0	0	0	0	0	0	0	0	0	0	0	0	0	0	0	0	0	0	0
Otu00655	Bacteria(100)	Proteobacteria(100)	Gammaproteobacteria(100)	Enterobacteriales(98)	Enterobacteriaceae(98)	Enterobacteriaceae_unclassified(95)	0	0	0	0	0	0	0	0	0	23	0	0	0	0	1	0	0	0	0	0	0	0	0	0	0	0	0	0	0	0	0	4	1	0	0	1	0	2	0	0	1	0	0
Otu00701	Bacteria(100)	Acidobacteria(100)	Acidobacteria_Gp1(100)	Acidobacteria_Gp1_order_incertae_sedis(100)	Acidobacteria_Gp1_family_incertae_sedis(100)	Gp1(100)	0	0	1	0	0	0	0	0	0	0	0	0	0	6	0	0	0	0	0	4	0	0	0	0	6	0	0	0	0	0	0	0	0	0	0	0	0	19	0	0	23	0	0
Otu00702	Bacteria(100)	Planctomycetes(100)	Planctomycetacia(100)	Planctomycetales(100)	Planctomycetaceae(100)	Planctomycetaceae_unclassified(100)	0	0	0	0	0	0	0	0	0	0	0	0	0	0	0	0	0	0	0	0	0	0	0	0	0	0	0	0	0	0	0	0	0	0	0	0	0	0	0	0	0	0	0
Otu00704	Bacteria(100)	Verrucomicrobia(100)	Spartobacteria(100)	Spartobacteria_order_incertae_sedis(100)	Spartobacteria_family_incertae_sedis(100)	Spartobacteria_genera_incertae_sedis(100)	0	0	0	0	0	0	0	0	0	0	0	0	0	0	0	0	0	0	0	0	0	0	0	0	0	0	0	0	0	0	0	0	0	0	0	0	0	0	211	0	336	0	0
Otu00707	Bacteria(100)	Actinobacteria(100)	Actinobacteria(100)	Actinomycetales(100)	Thermomonosporaceae(99)	Thermomonosporaceae_unclassified(98)	3	0	0	0	0	0	0	0	0	0	0	0	0	0	0	0	2	0	0	0	3	1	0	0	2	0	0	0	0	0	0	0	0	0	0	0	0	0	0	0	0	473	0
Otu00691	Bacteria(100)	Proteobacteria(100)	Alphaproteobacteria(100)	Rickettsiales(100)	Rickettsiaceae(100)	Rickettsia(100)	0	0	0	0	0	0	0	0	0	0	0	0	0	0	0	0	0	0	0	0	5	0	0	0	0	0	0	0	0	0	0	0	0	0	0	0	48	2	9	0	0	0	0
Otu00709	Bacteria(100)	Actinobacteria(100)	Actinobacteria(100)	Actinomycetales(100)	Nocardioidaceae(100)	Nocardioides(100)	0	1	0	0	0	16	0	0	0	0	0	0	0	0	0	0	8	0	0	0	0	0	0	0	0	0	0	0	0	0	0	2	0	0	0	0	0	37	0	0	2	0	0
Otu00705	Bacteria(100)	Proteobacteria(100)	Alphaproteobacteria(100)	Rhizobiales(100)	Rhizobiales_unclassified(100)	Rhizobiales_unclassified(100)	4	4	0	0	0	0	0	0	0	0	0	0	0	0	0	0	0	1	3	0	0	0	0	0	1	0	0	0	0	0	0	0	0	0	0	0	0	53	135	3	43	0	6
Otu00711	Bacteria(100)	Proteobacteria(100)	Alphaproteobacteria(100)	Rhizobiales(100)	Methylobacteriaceae(100)	Methylobacterium(100)	0	0	0	0	0	0	0	0	0	0	0	0	0	0	0	0	0	0	0	0	0	0	0	0	0	0	0	0	0	0	0	0	0	0	0	0	0	21	127	17	236	0	34
Otu00710	Bacteria(100)	Planctomycetes(100)	Planctomycetacia(100)	Planctomycetales(100)	Planctomycetaceae(100)	Zavarzinella(100)	0	21	0	0	0	0	0	0	0	0	0	0	0	0	0	0	0	0	0	0	0	0	0	0	0	0	0	0	0	0	0	0	0	0	0	0	0	76	0	0	0	0	0
Otu00712	Bacteria(100)	Bacteria_unclassified(100)	Bacteria_unclassified(100)	Bacteria_unclassified(100)	Bacteria_unclassified(100)	Bacteria_unclassified(100)	0	0	0	0	0	0	0	0	0	0	0	0	0	0	0	0	0	0	0	0	0	0	0	0	0	0	0	0	0	0	0	0	0	0	0	0	0	0	0	0	0	0	0
Otu00713	Bacteria(100)	Firmicutes(100)	Clostridia(100)	Clostridiales(100)	Clostridiaceae_1(100)	Clostridium_sensu_stricto(100)	0	0	0	0	0	0	0	0	0	0	0	0	0	0	0	0	0	0	0	0	0	0	0	2	0	0	0	0	0	0	0	0	0	0	0	0	0	0	0	1	0	0	0
Otu00714	Bacteria(100)	Proteobacteria(100)	Proteobacteria_unclassified(100)	Proteobacteria_unclassified(100)	Proteobacteria_unclassified(100)	Proteobacteria_unclassified(100)	3	0	0	0	0	0	0	0	0	0	0	0	0	0	0	0	0	0	0	0	0	0	0	0	0	0	0	0	0	0	0	0	0	0	0	0	0	539	0	0	0	0	0
Otu00715	Bacteria(100)	Bacteroidetes(100)	Bacteroidia(100)	Bacteroidales(100)	Bacteroidales_unclassified(65)	Bacteroidales_unclassified(65)	0	0	0	0	0	0	0	0	0	0	0	0	0	0	0	0	0	0	0	0	0	0	0	0	0	0	0	0	0	0	0	0	0	0	0	0	0	0	0	0	0	0	0
Otu00716	Bacteria(100)	Verrucomicrobia(100)	Opitutae(100)	Opitutales(100)	Opitutaceae(100)	Opitutaceae_unclassified(94)	0	0	0	0	0	0	0	0	0	0	0	0	0	0	0	0	0	0	0	0	0	0	0	0	0	0	0	0	0	0	0	0	0	0	0	0	0	2	13	0	9	0	0
Otu00717	Bacteria(100)	Proteobacteria(100)	Deltaproteobacteria(100)	Myxococcales(100)	Myxococcales_unclassified(100)	Myxococcales_unclassified(100)	0	0	0	0	0	0	0	0	0	0	0	0	0	0	0	0	0	0	0	0	0	0	0	0	0	0	0	0	0	0	0	0	0	0	0	0	0	0	0	0	0	0	0
Otu00719	Bacteria(100)	Proteobacteria(100)	Gammaproteobacteria(100)	Pseudomonadales(100)	Moraxellaceae(100)	Acinetobacter(100)	0	0	0	0	0	0	0	0	0	0	0	0	0	0	0	0	0	0	0	0	0	0	0	0	0	0	0	0	0	0	0	0	0	0	0	0	0	0	0	0	0	0	0
Otu00720	Bacteria(100)	Bacteroidetes(100)	Bacteroidetes_unclassified(100)	Bacteroidetes_unclassified(100)	Bacteroidetes_unclassified(100)	Bacteroidetes_unclassified(100)	0	0	0	0	0	0	0	0	0	0	0	0	0	0	16	0	0	0	0	0	0	0	6	1	1	0	13	3	0	0	0	0	0	0	0	0	0	0	0	0	0	0	0
Otu00721	Bacteria(100)	Bacteria_unclassified(100)	Bacteria_unclassified(100)	Bacteria_unclassified(100)	Bacteria_unclassified(100)	Bacteria_unclassified(100)	0	0	0	0	0	0	0	0	0	0	0	0	0	0	0	0	0	0	0	0	0	0	0	0	0	0	9	0	0	0	0	0	0	0	0	0	0	0	0	0	0	0	0
Otu00722	Bacteria(100)	Bacteria_unclassified(100)	Bacteria_unclassified(100)	Bacteria_unclassified(100)	Bacteria_unclassified(100)	Bacteria_unclassified(100)	0	0	0	0	0	0	0	0	0	0	0	0	0	2	0	0	0	0	0	0	0	0	0	0	0	0	0	0	0	0	0	0	0	0	0	0	0	0	0	0	0	0	0
Otu00723	Bacteria(100)	Actinobacteria(100)	Actinobacteria(100)	Actinomycetales(100)	Actinomycetales_unclassified(96)	Actinomycetales_unclassified(96)	0	0	0	0	0	0	1	101	0	0	18	1	385	0	0	0	0	0	0	0	0	0	0	0	0	0	0	0	0	0	0	0	0	0	0	0	0	0	0	0	0	0	0
Otu00638	Bacteria(100)	Actinobacteria(100)	Actinobacteria(100)	Solirubrobacterales(100)	Conexibacteraceae(95)	Conexibacter(95)	0	0	0	0	0	0	0	0	0	0	0	0	0	0	0	13	4	0	6	0	2	0	0	0	0	0	0	0	0	0	0	0	0	0	0	0	43	0	41	0	38	0	169
Otu00724	Bacteria(100)	Bacteria_unclassified(100)	Bacteria_unclassified(100)	Bacteria_unclassified(100)	Bacteria_unclassified(100)	Bacteria_unclassified(100)	5	0	0	0	0	0	0	0	0	0	0	0	0	0	0	2	2	0	0	0	6	1	7	0	4	0	0	0	0	0	0	4	0	0	0	0	0	15	92	0	7	0	176
Otu00708	Bacteria(100)	Proteobacteria(100)	Gammaproteobacteria(64)	Gammaproteobacteria_unclassified(64)	Gammaproteobacteria_unclassified(64)	Gammaproteobacteria_unclassified(64)	1	0	0	0	0	0	0	0	0	0	0	0	0	0	0	0	0	0	0	0	0	0	0	0	4	0	0	0	0	0	0	0	0	0	0	0	0	0	6	0	0	0	0
Otu00726	Bacteria(100)	Proteobacteria(100)	Gammaproteobacteria(100)	Xanthomonadales(100)	Xanthomonadaceae(100)	Dyella(100)	0	0	0	0	0	0	0	0	0	0	0	0	0	0	0	0	0	0	0	0	0	0	0	0	0	0	0	0	0	0	0	0	0	0	0	0	0	22	62	0	8	0	0
Otu00728	Bacteria(100)	Bacteria_unclassified(100)	Bacteria_unclassified(100)	Bacteria_unclassified(100)	Bacteria_unclassified(100)	Bacteria_unclassified(100)	0	0	0	0	0	0	0	2	0	0	0	0	0	0	25	1	0	0	0	0	0	0	0	0	1	0	22	0	0	0	0	0	0	0	0	0	0	0	0	0	0	0	0
Otu00729	Bacteria(100)	Proteobacteria(100)	Betaproteobacteria(100)	Neisseriales(100)	Neisseriaceae(100)	Neisseriaceae_unclassified(85)	0	0	0	0	0	0	0	0	0	0	0	0	0	0	0	0	0	0	0	0	0	0	0	0	0	0	0	0	0	0	0	0	0	0	0	0	0	0	0	0	0	0	0
Otu00730	Bacteria(100)	Proteobacteria(100)	Gammaproteobacteria(100)	Gammaproteobacteria_unclassified(100)	Gammaproteobacteria_unclassified(100)	Gammaproteobacteria_unclassified(100)	0	0	0	0	0	0	0	0	0	0	0	0	0	0	0	0	0	0	0	0	0	0	0	0	0	0	0	0	0	0	0	0	0	0	0	0	0	0	0	0	29	0	0
Otu00731	Bacteria(100)	Bacteria_unclassified(100)	Bacteria_unclassified(100)	Bacteria_unclassified(100)	Bacteria_unclassified(100)	Bacteria_unclassified(100)	0	0	0	0	0	0	0	0	0	0	0	0	0	0	0	0	0	0	0	0	7	0	3	0	0	0	0	0	0	0	0	0	0	0	0	8	0	51	222	0	5	0	71
Otu00725	Bacteria(100)	Firmicutes(100)	Bacilli(100)	Bacillales(100)	Bacillaceae_2(100)	Bacillaceae_2_unclassified(97)	0	0	0	0	0	0	4	0	0	0	0	0	0	0	0	0	0	0	0	0	0	0	0	0	0	0	0	1	0	0	0	0	0	0	0	0	0	0	0	0	0	0	0
Otu00732	Bacteria(100)	Proteobacteria(100)	Alphaproteobacteria(100)	Rhodospirillales(100)	Rhodospirillales_unclassified(100)	Rhodospirillales_unclassified(100)	0	0	0	0	0	0	0	0	0	0	0	0	0	0	0	0	0	0	0	0	0	3	0	1	2	0	0	0	0	0	0	0	0	0	0	0	0	0	0	0	0	0	0
Otu00733	Bacteria(100)	Planctomycetes(100)	Planctomycetacia(100)	Planctomycetales(100)	Planctomycetaceae(100)	Planctomycetaceae_unclassified(100)	0	0	0	0	0	0	0	0	0	0	0	0	0	0	0	0	0	0	0	0	0	0	0	0	0	0	0	0	0	0	0	0	0	0	0	0	0	0	120	0	96	0	192
Otu00735	Bacteria(100)	Firmicutes(100)	Clostridia(100)	Clostridiales(100)	Ruminococcaceae(100)	Papillibacter(100)	0	0	0	0	0	0	0	0	0	0	0	0	0	0	0	0	0	0	0	0	0	0	0	0	0	0	0	0	0	0	0	0	0	0	0	0	0	0	0	0	0	0	0
Otu00736	Bacteria(100)	Bacteroidetes(100)	Sphingobacteria(100)	Sphingobacteriales(100)	Chitinophagaceae(100)	Chitinophagaceae_unclassified(100)	0	0	0	0	0	0	0	0	0	0	0	0	0	0	0	0	0	0	0	0	0	0	0	0	0	0	0	0	0	0	0	0	0	0	0	0	0	0	0	0	1	0	0
Otu00737	Bacteria(100)	Proteobacteria(100)	Alphaproteobacteria(100)	Rhizobiales(100)	Methylobacteriaceae(100)	Methylobacterium(100)	0	0	0	0	0	0	0	0	0	0	0	0	0	0	0	0	0	0	0	0	0	0	0	0	0	0	0	0	0	0	0	0	0	0	0	0	0	123	265	85	30	0	0
Otu00706	Bacteria(100)	Firmicutes(100)	Bacilli(100)	Lactobacillales(100)	Carnobacteriaceae(100)	Dolosigranulum(100)	0	53	5	0	3	0	6	0	0	0	0	0	0	3	0	0	0	0	0	0	0	0	0	0	0	0	0	0	0	0	0	0	0	0	0	0	0	0	0	0	0	0	0
Otu00738	Bacteria(100)	Firmicutes(100)	Bacilli(100)	Lactobacillales(100)	Streptococcaceae(100)	Streptococcus(100)	2	0	0	0	0	0	0	0	0	0	0	6	0	0	0	0	0	0	0	0	0	0	0	0	0	0	0	0	0	0	0	0	0	0	0	0	0	0	0	0	0	0	0
Otu00739	Bacteria(100)	Bacteroidetes(100)	Sphingobacteria(100)	Sphingobacteriales(100)	Chitinophagaceae(100)	Chitinophagaceae_unclassified(100)	0	0	0	0	0	0	0	0	0	0	0	0	0	20	0	0	0	0	0	0	1	0	0	0	0	0	0	0	0	0	0	0	0	0	0	0	0	0	0	0	21	0	0
Otu00740	Bacteria(100)	Proteobacteria(100)	Proteobacteria_unclassified(100)	Proteobacteria_unclassified(100)	Proteobacteria_unclassified(100)	Proteobacteria_unclassified(100)	13	29	51	0	0	27	3	0	8	0	0	0	0	0	0	0	0	0	0	0	0	0	0	0	0	0	0	0	0	0	0	0	0	0	0	0	0	0	0	0	61	0	45
Otu00741	Bacteria(100)	Proteobacteria(100)	Gammaproteobacteria(100)	Xanthomonadales(100)	Xanthomonadaceae(100)	Xanthomonadaceae_unclassified(100)	0	0	0	0	0	0	0	0	0	0	0	0	0	0	0	0	0	0	0	0	0	0	0	0	0	0	0	0	0	0	0	0	0	0	0	0	0	23	0	0	0	0	152
Otu00742	Bacteria(100)	Firmicutes(100)	Clostridia(100)	Clostridiales(100)	Clostridiales_unclassified(100)	Clostridiales_unclassified(100)	0	0	0	0	0	0	0	0	0	0	0	0	0	0	0	0	0	0	0	0	0	0	0	0	0	0	0	0	0	0	0	0	0	0	0	0	0	0	0	0	0	0	0
Otu00743	Bacteria(100)	Proteobacteria(100)	Alphaproteobacteria(100)	Alphaproteobacteria_unclassified(85)	Alphaproteobacteria_unclassified(85)	Alphaproteobacteria_unclassified(85)	0	0	0	0	0	0	0	0	0	0	0	0	0	0	0	0	0	0	0	0	0	0	0	0	0	0	0	0	0	0	0	0	0	0	0	0	0	2	0	0	0	0	0
Otu00744	Bacteria(100)	Bacteria_unclassified(100)	Bacteria_unclassified(100)	Bacteria_unclassified(100)	Bacteria_unclassified(100)	Bacteria_unclassified(100)	0	0	0	0	0	0	0	0	0	0	0	0	0	0	0	0	0	0	0	0	0	0	0	0	0	0	0	0	0	0	0	0	0	0	0	0	0	15	0	0	1	0	0
Otu00745	Bacteria(100)	Actinobacteria(100)	Actinobacteria(100)	Actinomycetales(100)	Nocardioidaceae(100)	Nocardioides(97)	0	0	0	0	0	0	0	1	0	0	0	0	0	0	0	11	0	1	0	0	0	0	0	0	0	0	0	0	0	0	0	9	0	0	0	5	0	69	0	0	3	161	0
Otu00746	Bacteria(100)	Actinobacteria(100)	Actinobacteria(100)	Actinomycetales(100)	Dietziaceae(100)	Dietzia(100)	0	0	0	0	0	0	0	2	0	0	0	0	0	0	0	0	0	0	0	0	0	0	0	0	0	0	0	0	0	0	0	0	0	0	0	0	0	0	0	0	11	0	0
Otu00747	Bacteria(100)	Bacteroidetes(100)	Bacteroidia(100)	Bacteroidales(100)	Prevotellaceae(100)	Xylanibacter(100)	0	0	0	0	0	0	0	0	0	0	0	0	0	0	0	0	0	1	0	0	1	0	0	0	0	0	0	0	0	0	0	0	0	0	0	0	0	0	0	0	0	0	0
Otu00749	Bacteria(100)	Bacteroidetes(100)	Sphingobacteria(100)	Sphingobacteriales(100)	Cytophagaceae(100)	Emticicia(100)	0	0	0	0	0	0	0	0	0	0	0	0	0	0	66	0	0	9	0	5	0	0	0	0	0	0	0	1	0	0	0	0	0	0	0	0	0	0	0	0	0	0	0
Otu00750	Bacteria(100)	Firmicutes(100)	Bacilli(100)	Lactobacillales(100)	Lactobacillaceae(100)	Lactobacillus(94)	0	0	0	0	1	0	0	0	0	0	0	0	0	520	0	0	0	0	0	0	0	0	0	0	0	0	0	0	0	0	0	0	0	0	0	0	0	0	0	0	0	0	0
Otu00751	Bacteria(100)	Bacteria_unclassified(100)	Bacteria_unclassified(100)	Bacteria_unclassified(100)	Bacteria_unclassified(100)	Bacteria_unclassified(100)	0	0	0	0	0	0	0	0	0	0	0	0	0	0	0	0	0	0	0	0	0	0	0	0	0	0	0	0	0	0	0	0	0	0	0	0	0	0	0	0	0	0	0
Otu00748	Bacteria(100)	Planctomycetes(100)	Planctomycetacia(100)	Planctomycetales(100)	Planctomycetaceae(100)	Singulisphaera(100)	0	0	0	0	0	0	0	0	0	0	0	0	0	0	0	0	0	0	0	0	0	4	0	0	0	0	0	0	0	0	0	0	0	0	0	0	0	0	6	0	232	0	50
Otu00752	Bacteria(100)	Proteobacteria(100)	Betaproteobacteria(100)	Hydrogenophilales(100)	Hydrogenophilaceae(100)	Hydrogenophilaceae_unclassified(100)	0	0	0	0	6	0	0	0	0	0	0	0	0	0	0	0	0	0	0	0	0	0	0	0	0	0	181	0	0	0	0	0	0	0	0	0	0	0	0	0	0	0	0
Otu00753	Bacteria(100)	Firmicutes(100)	Clostridia(100)	Clostridiales(100)	Lachnospiraceae(100)	Blautia(100)	0	0	0	0	0	0	0	0	0	0	0	0	0	0	0	0	0	2	0	0	0	0	0	0	0	0	0	0	0	0	0	0	0	0	0	0	0	0	0	0	0	0	0
Otu00703	Bacteria(100)	Proteobacteria(100)	Alphaproteobacteria(100)	Rhizobiales(100)	Methylobacteriaceae(100)	Methylobacteriaceae_unclassified(52)	0	0	0	0	0	0	0	28	0	0	0	0	0	0	8	0	0	0	0	0	0	0	0	0	0	0	0	0	0	0	0	0	0	0	0	0	0	3	31	0	17	0	15
Otu00754	Bacteria(100)	Actinobacteria(100)	Actinobacteria(100)	Actinomycetales(100)	Micromonosporaceae(100)	Actinoplanes(100)	0	0	0	0	0	0	0	0	0	0	0	0	0	0	0	0	0	0	0	0	0	0	1	0	0	0	0	0	0	0	0	0	0	0	0	0	0	44	230	0	15	0	0
Otu00755	Bacteria(100)	Verrucomicrobia(100)	Subdivision3(100)	Subdivision3_order_incertae_sedis(100)	Subdivision3_family_incertae_sedis(100)	3_genus_incertae_sedis(100)	0	0	0	0	0	0	0	0	0	0	0	0	0	0	0	0	0	0	0	0	0	0	0	0	0	0	0	0	0	0	0	0	0	0	0	0	0	0	0	0	0	0	0
Otu00756	Bacteria(100)	Actinobacteria(100)	Actinobacteria(100)	Actinomycetales(100)	Actinomycetales_unclassified(100)	Actinomycetales_unclassified(100)	0	0	0	0	0	0	0	0	0	0	0	0	0	0	0	0	0	0	0	1	8	8	0	0	6	0	0	0	0	0	0	0	0	0	0	0	0	136	65	0	32	0	169
Otu00757	Bacteria(100)	Proteobacteria(100)	Alphaproteobacteria(100)	Rhizobiales(100)	Xanthobacteraceae(100)	Labrys(100)	0	0	0	0	0	0	0	7	0	0	0	0	0	0	0	0	0	0	0	0	0	0	0	0	0	0	0	0	0	0	0	0	0	0	0	0	0	14	10	0	0	0	0
Otu00759	Bacteria(100)	Proteobacteria(100)	Alphaproteobacteria(100)	Rhizobiales(100)	Rhizobiales_unclassified(84)	Rhizobiales_unclassified(84)	0	0	0	0	0	0	0	0	0	0	0	0	0	0	0	0	0	0	0	0	0	1	0	0	0	0	0	0	0	0	0	0	0	0	0	0	0	48	155	0	1	0	215
Otu00760	Bacteria(100)	Actinobacteria(100)	Actinobacteria(100)	Actinomycetales(100)	Actinomycetales_unclassified(100)	Actinomycetales_unclassified(100)	0	0	0	0	0	0	0	0	0	0	0	0	0	0	0	0	0	0	0	0	0	0	0	0	0	0	0	0	0	0	0	0	0	0	0	0	0	342	3	161	5	0	0
Otu00762	Bacteria(100)	Verrucomicrobia(59)	Verrucomicrobia_unclassified(59)	Verrucomicrobia_unclassified(59)	Verrucomicrobia_unclassified(59)	Verrucomicrobia_unclassified(59)	0	0	0	0	0	0	0	0	0	0	0	0	0	0	1	0	0	0	0	0	0	0	0	0	0	0	0	0	0	0	0	0	0	0	0	0	0	231	0	0	31	0	120
Otu00763	Bacteria(100)	Proteobacteria(100)	Alphaproteobacteria(100)	Rhizobiales(100)	Rhizobiales_unclassified(56)	Rhizobiales_unclassified(56)	0	0	0	0	0	0	0	0	0	0	0	0	0	0	0	0	0	0	0	0	0	0	0	0	0	1	0	0	0	0	0	0	0	0	0	0	0	204	120	43	1	0	31
Otu00764	Bacteria(100)	Bacteria_unclassified(100)	Bacteria_unclassified(100)	Bacteria_unclassified(100)	Bacteria_unclassified(100)	Bacteria_unclassified(100)	0	0	0	0	0	0	0	0	132	0	0	0	0	0	0	0	0	0	0	0	0	0	0	0	0	0	0	0	0	0	0	0	0	0	0	0	0	0	0	0	0	0	0
Otu00765	Bacteria(100)	Bacteroidetes(100)	Bacteroidia(100)	Bacteroidales(100)	Bacteroidales_unclassified(100)	Bacteroidales_unclassified(100)	0	0	0	0	0	0	0	0	0	0	0	0	0	0	0	0	0	0	0	0	0	0	0	0	0	0	0	0	0	0	0	0	0	0	0	0	0	0	0	0	0	0	0
Otu00766	Bacteria(100)	Bacteria_unclassified(100)	Bacteria_unclassified(100)	Bacteria_unclassified(100)	Bacteria_unclassified(100)	Bacteria_unclassified(100)	0	0	0	0	0	0	0	0	0	0	0	0	0	0	0	0	0	0	0	0	0	0	0	0	0	0	0	0	0	0	0	0	0	0	0	0	0	0	0	0	0	0	0
Otu00767	Bacteria(100)	Planctomycetes(100)	Planctomycetacia(100)	Planctomycetales(100)	Planctomycetaceae(100)	Singulisphaera(100)	0	0	0	0	0	0	0	0	0	0	0	0	0	0	0	0	0	0	0	0	0	0	0	0	0	0	0	0	0	0	0	0	0	0	0	0	0	86	185	16	53	0	82
Otu00770	Bacteria(100)	SR1(100)	SR1_class_incertae_sedis(100)	SR1_order_incertae_sedis(100)	SR1_family_incertae_sedis(100)	SR1_genus_incertae_sedis(100)	0	0	0	0	0	0	0	0	0	0	0	0	0	0	0	0	0	0	0	0	0	0	0	0	0	0	0	0	0	0	0	0	0	0	0	0	0	0	0	0	0	484	0
Otu00771	Bacteria(100)	Bacteria_unclassified(100)	Bacteria_unclassified(100)	Bacteria_unclassified(100)	Bacteria_unclassified(100)	Bacteria_unclassified(100)	0	14	1	0	0	0	0	0	0	0	0	0	0	0	0	0	0	0	0	6	1	1	0	0	1	0	0	0	0	0	0	0	0	0	0	0	0	0	0	0	0	0	0
Otu00678	Bacteria(100)	Firmicutes(100)	Bacilli(100)	Lactobacillales(100)	Lactobacillaceae(100)	Lactobacillaceae_unclassified(60)	5	232	2	13	8	165	0	0	0	0	0	0	0	0	0	0	0	0	0	0	0	0	0	0	2	0	0	0	0	0	0	0	0	0	0	0	0	0	6	0	0	0	0
Otu00768	Bacteria(100)	Planctomycetes(100)	Planctomycetacia(100)	Planctomycetales(100)	Planctomycetaceae(100)	Singulisphaera(100)	0	0	0	0	0	0	0	0	0	0	0	0	0	0	0	0	0	0	0	0	0	0	0	0	0	0	0	0	0	0	0	0	0	0	0	0	0	15	111	0	63	0	89
Otu00773	Bacteria(100)	Planctomycetes(100)	Planctomycetacia(100)	Planctomycetales(100)	Planctomycetaceae(100)	Singulisphaera(100)	0	0	0	0	0	0	0	0	0	0	0	0	0	0	0	0	0	0	0	0	0	2	0	0	0	0	0	0	0	0	0	0	0	0	0	0	0	3	272	0	65	0	0
Otu00774	Bacteria(100)	Proteobacteria(100)	Alphaproteobacteria(100)	Alphaproteobacteria_unclassified(56)	Alphaproteobacteria_unclassified(56)	Alphaproteobacteria_unclassified(56)	0	29	0	0	0	0	0	0	0	0	0	0	0	0	0	0	0	0	0	0	0	0	0	0	0	0	0	0	0	0	0	0	0	0	0	0	0	148	0	0	66	0	0
Otu00775	Bacteria(100)	Actinobacteria(100)	Actinobacteria(100)	Actinomycetales(100)	Actinomycetales_unclassified(100)	Actinomycetales_unclassified(100)	0	0	0	0	0	0	0	0	455	0	0	0	0	0	0	0	0	0	0	0	0	0	0	0	0	0	0	0	0	0	0	0	0	0	0	0	0	0	0	0	0	0	0
Otu00776	Bacteria(100)	Deinococcus-Thermus(100)	Deinococci(100)	Deinococcales(100)	Deinococcaceae(100)	Deinococcus(100)	0	0	0	0	0	0	0	0	0	0	0	0	0	0	0	0	0	0	0	0	0	0	0	0	0	0	0	0	0	0	0	0	0	1	0	0	0	175	16	0	173	0	93
Otu00777	Bacteria(100)	Bacteroidetes(100)	Bacteroidetes_unclassified(100)	Bacteroidetes_unclassified(100)	Bacteroidetes_unclassified(100)	Bacteroidetes_unclassified(100)	0	0	0	0	0	0	0	0	0	0	0	0	0	0	0	0	0	0	0	0	0	0	0	0	0	0	0	0	0	0	0	0	0	0	0	0	0	0	0	0	0	0	0
Otu00779	Bacteria(100)	Firmicutes(100)	Clostridia(100)	Clostridiales(100)	Clostridiales_Incertae_Sedis_XI(100)	Gallicola(99)	0	0	0	0	0	0	0	0	0	0	0	0	0	0	0	0	0	0	0	0	0	0	0	0	0	0	0	0	0	0	0	0	0	0	0	0	0	121	138	5	39	0	166
Otu00772	Bacteria(100)	Acidobacteria(100)	Acidobacteria_Gp7(100)	Acidobacteria_Gp7_order_incertae_sedis(100)	Acidobacteria_Gp7_family_incertae_sedis(100)	Gp7(100)	0	0	0	0	0	0	0	0	0	0	0	0	0	12	0	0	0	0	0	0	0	6	0	0	0	0	0	0	0	0	0	0	0	0	0	0	0	0	19	0	136	0	0
Otu00780	Bacteria(100)	Actinobacteria(100)	Actinobacteria(100)	Actinobacteria_unclassified(100)	Actinobacteria_unclassified(100)	Actinobacteria_unclassified(100)	0	0	0	0	0	0	0	0	0	0	0	0	0	0	0	0	0	0	0	0	0	0	1	0	0	0	0	0	0	0	0	0	0	0	0	0	0	9	69	0	12	319	14
Otu00783	Bacteria(100)	Bacteria_unclassified(100)	Bacteria_unclassified(100)	Bacteria_unclassified(100)	Bacteria_unclassified(100)	Bacteria_unclassified(100)	0	0	0	0	0	0	0	0	0	0	0	0	0	0	0	0	0	0	0	0	0	0	0	0	0	0	0	0	0	0	0	0	0	0	0	0	0	0	0	0	0	0	0
Otu00784	Bacteria(100)	Proteobacteria(100)	Alphaproteobacteria(100)	Rhizobiales(100)	Rhizobiales_unclassified(100)	Rhizobiales_unclassified(100)	0	0	0	0	0	0	0	0	0	0	0	0	0	0	0	0	0	0	0	0	0	0	0	0	0	0	0	0	0	0	0	0	0	0	0	0	0	6	346	0	86	0	0
Otu00778	Bacteria(100)	Proteobacteria(100)	Betaproteobacteria(100)	Burkholderiales(100)	Burkholderiaceae(100)	Cupriavidus(100)	0	0	0	0	0	28	0	0	177	2	0	0	0	0	0	0	0	0	0	0	0	0	0	0	0	0	0	0	0	0	0	0	0	0	0	0	0	2	0	0	0	0	0
Otu00782	Bacteria(100)	Deinococcus-Thermus(100)	Deinococci(100)	Thermales(100)	Thermaceae(100)	Thermus(100)	0	0	0	0	0	0	0	0	0	0	0	0	0	0	0	0	0	0	0	0	0	0	0	1	0	1	0	0	0	0	0	0	0	0	0	0	0	0	0	0	0	0	0
Otu00786	Bacteria(100)	Bacteria_unclassified(100)	Bacteria_unclassified(100)	Bacteria_unclassified(100)	Bacteria_unclassified(100)	Bacteria_unclassified(100)	0	0	0	0	0	0	0	0	0	0	0	0	0	0	0	0	0	0	0	0	0	0	0	0	0	0	0	0	0	0	0	0	0	0	0	0	0	0	0	0	0	0	0
Otu00788	Bacteria(100)	Proteobacteria(100)	Proteobacteria_unclassified(100)	Proteobacteria_unclassified(100)	Proteobacteria_unclassified(100)	Proteobacteria_unclassified(100)	0	0	0	0	0	0	0	0	0	0	0	0	0	0	0	0	0	0	0	0	0	0	0	0	0	0	0	0	0	0	0	0	0	0	0	0	0	0	0	0	0	0	0
Otu00769	Bacteria(100)	Bacteroidetes(100)	Sphingobacteria(100)	Sphingobacteriales(100)	Cytophagaceae(100)	Hymenobacter(100)	0	0	3	0	0	8	0	0	184	0	0	0	0	0	0	0	0	0	0	0	0	0	0	0	0	0	0	0	0	0	0	0	0	0	0	0	0	4	0	0	4	0	0
Otu00787	Bacteria(100)	Proteobacteria(100)	Alphaproteobacteria(100)	Rhizobiales(100)	Rhizobiales_unclassified(100)	Rhizobiales_unclassified(100)	0	0	0	0	0	0	0	0	0	0	0	0	0	3	0	0	0	0	0	0	0	0	0	0	0	0	0	0	0	0	0	0	0	0	0	0	0	2	18	120	0	0	2
Otu00789	Bacteria(100)	Proteobacteria(100)	Alphaproteobacteria(100)	Sphingomonadales(100)	Sphingomonadaceae(100)	Sphingomonas(100)	0	13	0	0	0	0	0	0	0	0	0	0	0	0	0	0	0	0	0	0	0	0	0	0	0	0	0	0	0	0	0	0	0	0	0	0	0	0	0	1	0	0	0
Otu00785	Bacteria(100)	Firmicutes(100)	Negativicutes(100)	Selenomonadales(100)	Veillonellaceae(100)	Veillonella(100)	0	0	0	0	0	0	0	0	0	0	0	0	0	0	0	0	0	0	0	0	0	0	0	0	1	0	0	0	0	0	0	0	0	0	0	0	0	16	0	0	22	0	4
Otu00790	Bacteria(100)	Bacteroidetes(100)	Sphingobacteria(100)	Sphingobacteriales(100)	Sphingobacteriaceae(100)	Sphingobacterium(100)	0	1	0	0	0	0	0	0	0	0	0	0	0	0	0	0	0	0	0	0	0	0	0	0	0	0	0	0	0	0	0	0	0	0	0	0	0	0	0	0	0	0	0
Otu00791	Bacteria(100)	Bacteria_unclassified(100)	Bacteria_unclassified(100)	Bacteria_unclassified(100)	Bacteria_unclassified(100)	Bacteria_unclassified(100)	0	0	0	0	0	0	0	0	479	0	0	0	0	0	0	0	0	0	0	0	0	0	0	0	0	0	0	0	0	0	0	0	0	0	0	0	0	0	0	0	0	0	0
Otu00792	Bacteria(100)	Proteobacteria(100)	Deltaproteobacteria(100)	Myxococcales(92)	Myxococcales_unclassified(92)	Myxococcales_unclassified(92)	0	9	0	0	0	0	0	0	0	0	0	0	0	0	0	0	0	0	0	0	0	0	0	1	0	0	0	0	0	0	0	0	0	0	0	0	0	144	0	0	76	0	94
Otu00793	Bacteria(100)	Actinobacteria(100)	Actinobacteria(100)	Acidimicrobiales(92)	Acidimicrobiales_unclassified(92)	Acidimicrobiales_unclassified(92)	0	0	0	0	0	0	0	0	0	0	0	0	0	0	0	0	0	0	0	0	0	0	0	0	0	0	0	0	0	0	0	0	0	0	0	0	0	1	81	0	16	0	113
Otu00795	Bacteria(100)	Proteobacteria(100)	Deltaproteobacteria(100)	Desulfobacterales(100)	Desulfobacteraceae(100)	Desulfobotulus(100)	0	0	0	0	0	0	0	0	0	0	0	0	0	0	0	0	0	3	0	0	0	0	0	9	1	0	0	0	0	0	0	0	0	0	0	0	0	0	0	0	0	0	0
Otu00796	Bacteria(100)	Actinobacteria(100)	Actinobacteria(100)	Actinomycetales(100)	Nocardioidaceae(100)	Nocardioides(100)	0	0	0	0	0	0	0	12	0	0	0	0	0	0	0	0	0	0	0	0	0	0	0	0	0	0	0	0	0	0	0	4	0	0	0	0	0	1	42	0	4	274	7
Otu00797	Bacteria(100)	Bacteria_unclassified(100)	Bacteria_unclassified(100)	Bacteria_unclassified(100)	Bacteria_unclassified(100)	Bacteria_unclassified(100)	0	0	0	0	0	0	0	0	0	0	0	0	0	0	0	0	0	0	1	0	0	0	0	0	0	0	0	0	0	0	0	0	0	0	0	0	0	0	0	0	0	0	0
Otu00798	Bacteria(100)	Bacteroidetes(100)	Flavobacteria(100)	Flavobacteriales(100)	Flavobacteriaceae(100)	Flavobacteriaceae_unclassified(52)	0	3	0	0	0	0	0	0	0	0	0	0	0	0	0	0	0	0	0	0	0	0	2	0	0	0	0	0	0	0	0	0	0	0	0	0	0	0	0	0	3	0	0
Otu00761	Bacteria(100)	Proteobacteria(100)	Alphaproteobacteria(100)	Rhizobiales(100)	Methylobacteriaceae(100)	Methylobacterium(100)	1	6	0	0	0	76	14	1	0	0	1	0	0	1	0	4	1	6	1	0	0	1	0	0	0	2	0	0	1	0	0	0	0	0	0	0	0	57	41	0	45	0	44
Otu00799	Bacteria(100)	Actinobacteria(100)	Actinobacteria(100)	Bifidobacteriales(100)	Bifidobacteriaceae(100)	Bifidobacteriaceae_unclassified(100)	0	0	0	0	0	0	0	0	0	0	0	0	0	0	0	0	0	0	0	0	0	0	0	0	0	0	0	0	0	0	0	0	0	0	0	0	0	0	1	0	470	0	0
Otu00800	Bacteria(100)	Bacteroidetes(100)	Sphingobacteria(100)	Sphingobacteriales(100)	Cytophagaceae(100)	Hymenobacter(100)	0	141	0	0	0	0	0	0	0	0	0	0	0	0	2	0	0	0	0	0	0	0	0	0	0	0	0	0	0	0	0	0	0	0	0	0	0	0	0	0	0	0	0
Otu00801	Bacteria(100)	Proteobacteria(100)	Gammaproteobacteria(100)	Pseudomonadales(100)	Moraxellaceae(100)	Alkanindiges(100)	0	1	16	0	0	96	0	0	0	0	0	0	0	0	0	0	0	0	0	0	0	0	0	0	0	0	19	0	0	0	0	0	0	0	0	0	0	38	0	0	3	0	0
Otu00802	Bacteria(100)	Planctomycetes(100)	Planctomycetacia(100)	Planctomycetales(100)	Planctomycetaceae(100)	Planctomycetaceae_unclassified(100)	0	0	0	0	0	0	0	0	0	0	0	0	0	0	0	0	0	0	0	0	0	0	0	0	0	0	0	0	0	0	0	0	0	0	0	0	0	0	0	0	0	0	0
Otu00803	Bacteria(100)	Actinobacteria(100)	Actinobacteria(100)	Actinomycetales(100)	Nocardioidaceae(100)	Nocardioides(100)	0	0	0	0	0	0	0	0	0	0	0	0	0	0	0	0	0	0	0	0	0	0	0	0	0	0	0	0	0	0	0	0	0	0	0	0	0	12	0	0	0	0	0
Otu00804	Bacteria(100)	Firmicutes(100)	Clostridia(100)	Clostridiales(100)	Ruminococcaceae(100)	Clostridium_IV(100)	0	0	0	0	0	0	0	0	0	0	0	0	0	0	0	0	0	0	0	0	0	0	0	0	0	0	0	0	0	0	0	0	0	0	0	0	0	0	0	0	0	0	0
Otu00805	Bacteria(100)	Bacteroidetes(100)	Sphingobacteria(100)	Sphingobacteriales(100)	Sphingobacteriaceae(100)	Mucilaginibacter(98)	0	0	0	0	0	0	0	0	0	0	0	0	0	0	0	0	0	0	0	0	0	0	0	0	0	0	2	0	0	0	0	0	0	0	0	0	0	102	40	0	40	0	214
Otu00794	Bacteria(100)	Actinobacteria(100)	Actinobacteria(100)	Actinomycetales(100)	Pseudonocardiaceae(100)	Pseudonocardia(100)	0	13	0	0	0	5	5	0	0	0	0	0	0	4	0	0	0	3	0	0	0	0	0	0	0	0	0	0	0	0	0	0	0	0	0	0	0	0	0	0	0	0	0
Otu00806	Bacteria(100)	Bacteria_unclassified(100)	Bacteria_unclassified(100)	Bacteria_unclassified(100)	Bacteria_unclassified(100)	Bacteria_unclassified(100)	0	0	0	0	0	0	0	0	0	0	0	0	0	0	0	0	0	0	0	0	0	1	0	0	6	0	0	0	0	0	0	0	0	0	0	0	0	1	0	0	0	0	0
Otu00807	Bacteria(100)	Actinobacteria(100)	Actinobacteria(100)	Actinomycetales(100)	Actinomycetales_unclassified(100)	Actinomycetales_unclassified(100)	0	0	0	0	0	0	0	0	0	0	0	0	0	0	0	0	0	0	0	0	0	0	0	0	0	0	0	0	0	0	0	0	0	0	0	0	0	0	0	0	0	0	0
Otu00808	Bacteria(100)	Bacteria_unclassified(100)	Bacteria_unclassified(100)	Bacteria_unclassified(100)	Bacteria_unclassified(100)	Bacteria_unclassified(100)	0	0	0	0	0	0	0	0	0	0	0	0	0	0	0	0	0	0	0	0	4	6	0	0	0	0	0	0	0	0	0	0	0	0	0	0	0	0	76	0	123	0	164
Otu00758	Bacteria(100)	Bacteroidetes(100)	Flavobacteria(100)	Flavobacteriales(100)	Flavobacteriaceae(100)	Chryseobacterium(100)	1	0	2	0	0	0	0	0	0	0	0	0	35	0	0	0	0	0	0	0	0	0	0	0	0	0	0	0	0	0	0	0	0	0	0	0	0	6	0	0	0	0	0
Otu00809	Bacteria(100)	Planctomycetes(100)	Planctomycetacia(100)	Planctomycetales(100)	Planctomycetaceae(100)	Singulisphaera(100)	0	0	0	0	0	0	0	0	0	0	0	0	0	0	0	0	0	0	0	0	0	0	0	0	0	0	0	0	0	0	0	0	0	0	0	0	0	76	138	0	235	0	0
Otu00810	Bacteria(100)	Bacteroidetes(100)	Sphingobacteria(100)	Sphingobacteriales(100)	Chitinophagaceae(100)	Sediminibacterium(100)	0	0	0	0	0	0	0	0	0	0	0	0	129	0	6	0	0	0	0	0	0	0	0	8	0	0	68	0	0	0	0	0	0	0	0	7	0	0	0	0	2	0	11
Otu00811	Bacteria(100)	Bacteria_unclassified(100)	Bacteria_unclassified(100)	Bacteria_unclassified(100)	Bacteria_unclassified(100)	Bacteria_unclassified(100)	0	0	0	0	0	0	0	0	463	0	0	0	0	0	0	0	0	0	0	0	0	0	0	0	0	0	0	0	0	0	0	0	0	0	0	0	0	0	0	0	0	0	0
Otu00812	Bacteria(100)	Firmicutes(100)	Clostridia(100)	Clostridiales(100)	Lachnospiraceae(100)	Lachnospiraceae_unclassified(100)	0	0	0	0	0	0	0	0	0	0	0	0	0	0	0	0	0	0	0	0	0	0	0	0	0	0	0	0	0	0	0	0	0	0	0	0	0	0	0	0	0	0	0
Otu00813	Bacteria(100)	Proteobacteria(100)	Alphaproteobacteria(100)	Rhodospirillales(100)	Acetobacteraceae(100)	Acetobacteraceae_unclassified(100)	0	0	0	0	0	0	0	0	0	0	0	0	0	0	0	0	0	0	0	0	0	0	0	0	0	0	0	0	0	0	0	0	0	0	0	0	0	38	177	0	31	0	38
Otu00814	Bacteria(100)	Bacteroidetes(100)	Flavobacteria(100)	Flavobacteriales(100)	Flavobacteriaceae(100)	Flavobacterium(100)	0	0	0	0	0	0	0	0	0	0	0	0	0	0	0	0	0	0	0	0	0	0	0	0	0	0	0	0	0	0	0	0	0	1	0	0	0	0	0	0	0	0	0
Otu00815	Bacteria(100)	Firmicutes(100)	Clostridia(100)	Clostridiales(100)	Clostridiales_unclassified(100)	Clostridiales_unclassified(100)	1	29	10	0	0	0	4	0	0	0	0	0	0	0	0	0	0	0	0	0	0	0	0	0	0	0	0	0	0	0	0	0	0	0	0	0	0	0	0	0	0	0	0
Otu00816	Bacteria(100)	Firmicutes(100)	Clostridia(100)	Clostridiales(100)	Clostridiales_Incertae_Sedis_XI(100)	Peptoniphilus(100)	0	0	0	0	0	0	0	0	0	0	0	0	0	15	0	0	0	0	0	0	0	0	0	0	0	0	0	0	0	0	0	0	0	0	0	0	0	0	0	0	0	0	0
Otu00817	Bacteria(100)	Proteobacteria(100)	Alphaproteobacteria(100)	Rhodospirillales(100)	Acetobacteraceae(100)	Acidisoma(100)	0	0	0	0	0	0	0	0	0	0	0	0	0	0	0	0	0	0	0	0	0	0	0	0	0	0	0	0	0	0	0	0	0	0	0	0	0	75	0	0	16	0	0
Otu00818	Bacteria(100)	Proteobacteria(100)	Alphaproteobacteria(100)	Caulobacterales(100)	Caulobacteraceae(100)	Caulobacteraceae_unclassified(99)	0	0	0	0	0	0	0	0	0	0	0	0	0	0	0	0	0	0	0	0	0	0	0	0	0	0	0	0	0	0	0	0	0	0	0	0	0	0	4	0	0	0	0
Otu00819	Bacteria(100)	Proteobacteria(100)	Gammaproteobacteria(100)	Pseudomonadales(100)	Moraxellaceae(100)	Psychrobacter(100)	0	0	6	0	0	0	0	0	0	0	0	0	0	0	0	2	0	0	0	0	0	0	0	0	0	0	105	0	0	0	0	0	0	0	0	0	0	0	0	0	0	0	0
Otu00820	Bacteria(100)	Actinobacteria(100)	Actinobacteria(100)	Solirubrobacterales(100)	Solirubrobacterales_unclassified(97)	Solirubrobacterales_unclassified(97)	0	2	0	0	2	15	0	0	0	0	0	0	0	0	0	2	0	0	1	0	0	1	0	0	0	0	0	0	0	0	0	0	0	0	0	0	0	50	153	58	34	0	45
Otu00821	Bacteria(100)	Bacteria_unclassified(100)	Bacteria_unclassified(100)	Bacteria_unclassified(100)	Bacteria_unclassified(100)	Bacteria_unclassified(100)	0	0	0	0	0	0	0	0	0	0	0	0	0	0	0	0	0	0	0	0	0	0	0	0	0	1	1	0	0	0	0	0	0	0	0	0	0	0	0	0	0	0	0
Otu00822	Bacteria(100)	OD1(100)	OD1_class_incertae_sedis(100)	OD1_order_incertae_sedis(100)	OD1_family_incertae_sedis(100)	OD1_genus_incertae_sedis(100)	0	0	0	0	0	0	0	0	0	0	0	0	0	0	0	0	0	0	0	0	0	0	0	0	0	0	0	0	0	0	0	0	0	0	0	0	0	0	0	0	0	0	0
Otu00823	Bacteria(100)	Firmicutes(100)	Clostridia(100)	Clostridiales(100)	Ruminococcaceae(100)	Clostridium_IV(100)	0	0	0	0	0	0	0	0	0	0	0	0	0	0	0	0	0	0	0	0	0	0	0	0	1	0	0	0	0	0	0	0	0	0	0	0	0	0	0	0	0	450	0
Otu00827	Bacteria(100)	Proteobacteria(100)	Betaproteobacteria(100)	Betaproteobacteria_unclassified(100)	Betaproteobacteria_unclassified(100)	Betaproteobacteria_unclassified(100)	0	0	0	0	0	0	0	0	0	0	0	0	0	0	0	0	0	0	0	0	0	0	0	0	0	0	0	0	0	0	0	0	0	0	0	0	0	0	0	0	0	0	0
Otu00828	Bacteria(100)	Bacteria_unclassified(100)	Bacteria_unclassified(100)	Bacteria_unclassified(100)	Bacteria_unclassified(100)	Bacteria_unclassified(100)	0	0	0	0	0	0	0	0	0	0	0	0	0	0	0	0	0	0	4	0	0	0	0	0	0	0	0	0	0	0	0	0	0	0	0	0	0	0	0	0	0	0	0
Otu00829	Bacteria(100)	Planctomycetes(100)	Planctomycetacia(100)	Planctomycetales(100)	Planctomycetaceae(100)	Planctomycetaceae_unclassified(100)	0	0	0	0	0	0	0	0	0	0	0	0	0	0	0	0	0	0	0	0	0	0	0	0	0	0	0	0	0	0	0	0	0	0	0	0	0	0	0	0	0	0	0
Otu00830	Bacteria(100)	Verrucomicrobia(100)	Subdivision3(100)	Subdivision3_order_incertae_sedis(100)	Subdivision3_family_incertae_sedis(100)	3_genus_incertae_sedis(100)	0	0	0	0	0	0	0	0	0	0	0	0	0	34	0	0	0	0	0	0	0	0	0	0	1	0	0	0	0	0	0	0	0	0	0	0	0	0	0	0	0	0	0
Otu00831	Bacteria(100)	Armatimonadetes(100)	Armatimonadia(100)	Armatimonadales(100)	Armatimonadaceae(100)	Armatimonas_Armatimonadetes_gp1(100)	0	0	0	0	0	0	0	0	0	0	0	1	0	0	0	0	0	0	0	0	0	0	0	0	0	0	0	0	0	0	0	0	0	0	0	0	0	0	0	0	0	0	0
Otu00834	Bacteria(100)	Proteobacteria(100)	Alphaproteobacteria(100)	Rhizobiales(100)	Rhizobiales_unclassified(100)	Rhizobiales_unclassified(100)	3	0	0	0	0	0	0	0	0	0	0	0	0	0	0	0	0	0	0	0	0	0	0	0	0	0	0	0	0	0	0	0	0	0	0	0	0	219	126	0	0	0	86
Otu00835	Bacteria(100)	Bacteroidetes(100)	Sphingobacteria(100)	Sphingobacteriales(100)	Cytophagaceae(100)	Spirosoma(100)	0	0	0	0	0	0	0	0	0	0	0	0	0	0	0	0	0	0	0	0	0	0	0	0	0	0	0	0	0	0	0	0	0	0	0	0	0	0	0	0	0	0	0
Otu00836	Bacteria(100)	Bacteroidetes(100)	Sphingobacteria(100)	Sphingobacteriales(100)	Sphingobacteriaceae(100)	Sphingobacteriaceae_unclassified(94)	0	5	0	0	0	0	0	0	0	0	0	0	0	15	0	0	0	0	0	0	0	0	0	0	0	0	0	0	0	0	0	0	0	0	0	0	0	45	0	0	7	0	2
Otu00837	Bacteria(100)	Bacteria_unclassified(100)	Bacteria_unclassified(100)	Bacteria_unclassified(100)	Bacteria_unclassified(100)	Bacteria_unclassified(100)	0	0	0	0	0	0	0	0	0	0	0	0	0	0	0	0	0	0	0	0	0	0	0	0	0	0	0	0	0	0	0	0	0	0	0	0	0	0	0	0	0	0	0
Otu00838	Bacteria(100)	Actinobacteria(100)	Actinobacteria(100)	Actinomycetales(100)	Dermacoccaceae(100)	Kytococcus(100)	0	7	11	0	0	0	0	0	0	0	0	0	0	0	8	0	0	0	0	0	0	0	0	0	0	0	0	0	0	0	0	0	0	0	0	0	0	0	0	0	0	0	0
Otu00840	Bacteria(100)	Bacteroidetes(100)	Sphingobacteria(100)	Sphingobacteriales(100)	Chitinophagaceae(100)	Chitinophagaceae_unclassified(60)	0	0	0	0	0	0	0	0	0	0	0	0	0	0	0	0	0	0	0	0	0	0	0	0	0	0	0	0	0	0	0	0	0	0	0	0	0	0	0	0	0	0	0
Otu00841	Bacteria(100)	Bacteroidetes(100)	Sphingobacteria(100)	Sphingobacteriales(100)	Sphingobacteriaceae(100)	Sphingobacterium(100)	0	0	0	0	0	0	0	0	0	0	0	0	0	0	272	0	0	0	0	0	0	0	0	0	0	0	0	0	0	0	0	0	0	0	0	0	0	0	0	0	0	0	0
Otu00842	Bacteria(100)	Proteobacteria(100)	Alphaproteobacteria(100)	Sphingomonadales(100)	Sphingomonadaceae(100)	Sphingomonas(100)	0	0	0	0	0	0	0	0	0	0	0	0	0	0	0	0	0	0	0	0	0	0	0	0	0	0	1	0	0	0	0	0	0	0	0	0	0	152	0	0	1	0	0
Otu00843	Bacteria(100)	Planctomycetes(100)	Planctomycetacia(100)	Planctomycetales(100)	Planctomycetaceae(100)	Planctomycetaceae_unclassified(100)	0	0	0	0	0	0	0	0	0	0	0	0	0	0	0	0	0	0	0	0	0	0	0	0	0	0	0	0	0	0	0	0	0	0	0	0	0	76	211	0	28	0	0
Otu00844	Bacteria(100)	Proteobacteria(100)	Gammaproteobacteria(100)	Enterobacteriales(100)	Enterobacteriaceae(100)	Enterobacteriaceae_unclassified(100)	2	18	3	0	0	79	0	0	0	0	0	0	0	0	0	0	0	0	0	0	0	8	0	0	1	0	0	0	0	0	0	0	0	0	0	0	0	0	0	0	0	0	0
Otu00825	Bacteria(100)	Actinobacteria(100)	Actinobacteria(100)	Solirubrobacterales(100)	Conexibacteraceae(99)	Conexibacter(99)	0	0	0	0	0	0	0	0	0	0	0	0	0	0	0	2	0	4	0	0	2	5	4	0	0	0	0	0	0	0	2	11	0	0	0	3	0	6	1	0	3	0	55
Otu00839	Bacteria(100)	Actinobacteria(100)	Actinobacteria(100)	Solirubrobacterales(100)	Patulibacteraceae(100)	Patulibacter(100)	0	0	6	2	0	0	0	0	0	0	0	0	0	0	0	0	7	0	0	1	2	2	0	0	1	0	0	0	0	0	7	6	0	0	0	5	0	34	43	0	46	0	29
Otu00845	Bacteria(100)	Bacteroidetes(100)	Bacteroidetes_unclassified(100)	Bacteroidetes_unclassified(100)	Bacteroidetes_unclassified(100)	Bacteroidetes_unclassified(100)	0	0	0	0	0	0	0	0	440	0	0	0	0	0	0	0	0	0	0	0	0	0	0	0	0	0	0	0	0	0	0	0	0	0	0	0	0	0	0	0	0	0	0
Otu00846	Bacteria(100)	Bacteria_unclassified(100)	Bacteria_unclassified(100)	Bacteria_unclassified(100)	Bacteria_unclassified(100)	Bacteria_unclassified(100)	0	0	0	0	0	0	0	0	0	0	0	0	0	0	0	0	0	0	0	0	0	0	0	0	0	0	0	0	0	0	0	0	0	0	0	0	0	0	0	0	0	0	0
Otu00727	Bacteria(100)	Proteobacteria(100)	Alphaproteobacteria(100)	Rhizobiales(100)	Rhizobiales_unclassified(59)	Rhizobiales_unclassified(59)	0	0	0	0	0	44	3	2	0	0	0	0	7	0	0	0	0	0	0	0	0	0	0	0	0	0	0	0	0	0	0	0	0	0	0	0	0	16	5	76	13	0	7
Otu00824	Bacteria(100)	Proteobacteria(100)	Betaproteobacteria(100)	Burkholderiales(100)	Oxalobacteraceae(87)	Oxalobacteraceae_unclassified(79)	2	0	0	0	0	0	2	0	0	0	0	0	0	0	0	0	0	0	0	0	0	0	0	0	0	0	0	0	0	0	0	0	0	0	0	0	0	16	0	0	2	0	113
Otu00848	Bacteria(100)	Proteobacteria(100)	Alphaproteobacteria(100)	Sphingomonadales(100)	Sphingomonadaceae(100)	Novosphingobium(80)	0	18	0	0	0	0	0	0	0	0	0	0	0	0	0	0	0	0	0	0	0	0	0	0	0	0	0	0	0	0	0	0	0	0	0	0	0	54	0	0	34	0	0
Otu00851	Bacteria(100)	Proteobacteria(100)	Alphaproteobacteria(100)	Rhodospirillales(100)	Acetobacteraceae(100)	Acetobacteraceae_unclassified(100)	0	42	0	0	0	0	2	0	0	0	0	0	0	0	0	0	0	0	0	0	0	0	0	0	0	0	0	0	0	0	0	0	0	0	0	0	0	55	2	0	40	0	80
Otu00852	Bacteria(100)	Bacteria_unclassified(100)	Bacteria_unclassified(100)	Bacteria_unclassified(100)	Bacteria_unclassified(100)	Bacteria_unclassified(100)	0	0	0	0	0	0	0	0	0	0	0	0	0	0	0	0	0	0	0	0	1	0	0	5	0	0	0	1	0	0	0	0	0	0	0	0	0	0	0	0	0	0	0
Otu00853	Bacteria(100)	Proteobacteria(100)	Alphaproteobacteria(100)	Rhizobiales(100)	Rhizobiales_unclassified(100)	Rhizobiales_unclassified(100)	0	0	0	0	0	0	0	0	0	0	0	0	0	0	0	0	0	0	0	0	1	1	0	0	0	0	0	0	0	0	0	0	0	0	0	0	0	27	10	0	30	0	35
Otu00854	Bacteria(100)	Bacteroidetes(100)	Flavobacteria(100)	Flavobacteriales(100)	Flavobacteriaceae(100)	Flavobacteriaceae_unclassified(100)	0	0	0	0	0	0	0	0	0	0	0	0	0	0	0	0	0	0	0	0	0	0	0	0	0	0	0	0	0	0	0	0	0	0	0	0	0	0	0	0	0	0	0
Otu00847	Bacteria(100)	Chlamydiae(97)	Chlamydiae(97)	Chlamydiales(97)	Chlamydiales_unclassified(97)	Chlamydiales_unclassified(97)	2	49	0	0	0	0	0	3	208	0	0	0	56	0	0	0	0	0	0	0	0	0	0	0	0	0	0	0	0	0	0	0	0	0	0	0	0	0	0	0	0	0	0
Otu00849	Bacteria(100)	Actinobacteria(100)	Actinobacteria(100)	Actinomycetales(100)	Actinomycetales_unclassified(100)	Actinomycetales_unclassified(100)	0	0	0	0	0	0	0	1	0	0	0	0	0	0	0	0	0	0	0	0	0	0	0	0	0	0	0	0	0	0	0	35	0	8	0	118	0	4	18	0	9	0	0
Otu00855	Bacteria(100)	Proteobacteria(100)	Alphaproteobacteria(100)	Rhodospirillales(100)	Acetobacteraceae(100)	Acetobacteraceae_unclassified(100)	0	0	0	0	0	0	0	0	0	0	0	0	0	0	0	0	0	0	0	0	0	0	4	0	2	0	0	0	0	0	0	0	0	0	0	0	0	11	17	0	11	0	0
Otu00856	Bacteria(100)	Bacteria_unclassified(100)	Bacteria_unclassified(100)	Bacteria_unclassified(100)	Bacteria_unclassified(100)	Bacteria_unclassified(100)	0	0	0	0	0	0	0	0	0	0	0	0	0	0	0	0	0	0	0	0	0	0	0	0	0	0	0	0	0	0	0	0	0	0	0	0	0	0	0	0	0	0	0
Otu00857	Bacteria(100)	Proteobacteria(100)	Epsilonproteobacteria(100)	Campylobacterales(100)	Campylobacteraceae(100)	Arcobacter(100)	0	0	0	0	0	0	0	0	0	0	0	0	0	0	0	0	5	0	0	0	0	0	0	21	0	0	0	0	0	0	0	0	0	0	0	0	0	0	0	0	0	0	0
Otu00858	Bacteria(100)	Proteobacteria(100)	Alphaproteobacteria(100)	Alphaproteobacteria_unclassified(100)	Alphaproteobacteria_unclassified(100)	Alphaproteobacteria_unclassified(100)	2	0	0	0	0	0	0	0	0	0	0	0	0	0	0	0	0	0	0	0	0	1	0	0	0	0	0	0	0	0	0	0	0	0	0	0	0	198	0	0	128	0	3
Otu00859	Bacteria(100)	Bacteria_unclassified(97)	Bacteria_unclassified(97)	Bacteria_unclassified(97)	Bacteria_unclassified(97)	Bacteria_unclassified(97)	0	8	0	0	0	0	0	0	0	0	0	0	0	0	0	0	0	0	0	0	0	0	0	0	0	0	0	0	0	0	0	0	0	0	0	0	0	0	0	0	0	420	0
Otu00860	Bacteria(100)	Proteobacteria(100)	Proteobacteria_unclassified(65)	Proteobacteria_unclassified(65)	Proteobacteria_unclassified(65)	Proteobacteria_unclassified(65)	0	0	0	0	0	0	0	0	0	0	0	0	0	0	0	0	0	0	0	0	0	0	0	0	0	0	0	0	0	0	0	0	0	0	0	0	0	3	0	0	0	0	0
Otu00861	Bacteria(100)	Armatimonadetes(100)	Armatimonadia(100)	Armatimonadales(100)	Armatimonadaceae(100)	Armatimonas_Armatimonadetes_gp1(100)	0	0	0	0	0	0	0	0	0	0	0	0	0	0	0	0	0	0	0	0	0	0	0	0	0	0	0	0	0	0	0	0	0	0	0	0	0	0	0	0	0	0	0
Otu00862	Bacteria(100)	Proteobacteria(100)	Betaproteobacteria(100)	Betaproteobacteria_unclassified(100)	Betaproteobacteria_unclassified(100)	Betaproteobacteria_unclassified(100)	0	0	0	0	0	0	0	0	0	0	0	0	0	0	42	0	0	0	0	0	0	0	0	0	0	2	73	0	0	0	0	0	0	0	0	0	0	0	0	0	0	0	0
Otu00863	Bacteria(100)	Actinobacteria(100)	Actinobacteria(100)	Solirubrobacterales(100)	Conexibacteraceae(100)	Conexibacter(100)	0	0	0	0	0	0	0	0	0	0	0	0	0	0	0	0	0	0	0	0	0	1	0	0	0	0	0	0	0	0	0	0	0	0	0	0	0	0	159	0	41	0	0
Otu00850	Bacteria(100)	Armatimonadetes(100)	Armatimonadetes_gp5_class_incertae_sedis(100)	Armatimonadetes_gp5_order_incetae_sedis(100)	Armatimonadetes_gp5_family_incetae_sedis(100)	Armatimonadetes_gp5(100)	0	11	0	0	0	0	0	0	0	0	0	0	0	0	0	0	0	0	0	0	0	0	0	0	0	0	0	0	0	0	0	0	0	0	0	0	0	2	0	0	53	0	41
Otu00865	Bacteria(100)	Proteobacteria(100)	Alphaproteobacteria(100)	Sphingomonadales(100)	Sphingomonadaceae(100)	Sphingomonas(91)	0	0	0	0	0	0	5	0	0	0	0	0	0	7	0	0	0	0	0	0	0	0	0	0	0	0	0	0	0	0	0	0	0	0	0	0	0	0	23	0	8	0	0
Otu00866	Bacteria(100)	Firmicutes(100)	Erysipelotrichia(100)	Erysipelotrichales(100)	Erysipelotrichaceae(100)	Erysipelotrichaceae_incertae_sedis(100)	0	0	0	0	0	0	0	0	0	0	0	0	0	0	0	0	4	0	0	0	0	0	0	0	0	0	0	0	0	0	0	0	0	0	0	0	0	0	0	0	0	0	0
Otu00867	Bacteria(100)	Actinobacteria(100)	Actinobacteria(100)	Actinomycetales(100)	Actinomycetales_unclassified(99)	Actinomycetales_unclassified(99)	0	0	0	0	0	6	0	0	0	0	0	0	0	0	0	5	0	0	0	0	0	4	0	0	0	0	0	0	0	0	0	2	0	0	0	6	0	46	35	0	1	0	19
Otu00869	Bacteria(100)	Firmicutes(100)	Clostridia(100)	Clostridiales(100)	Clostridiales_Incertae_Sedis_XI(100)	Anaerococcus(100)	0	0	0	0	0	0	0	0	0	0	0	0	0	25	0	0	0	0	0	0	0	0	0	0	0	0	0	0	0	0	0	0	0	0	0	0	0	0	0	0	0	0	0
Otu00871	Bacteria(100)	Bacteroidetes(100)	Sphingobacteria(100)	Sphingobacteriales(100)	Sphingobacteriaceae(100)	Pedobacter(52)	0	0	0	0	0	48	0	0	0	0	0	0	0	0	8	0	0	0	0	0	0	0	0	7	0	0	0	0	2	0	0	0	0	0	0	0	0	0	0	0	13	0	35
Otu00864	Bacteria(100)	Firmicutes(100)	Clostridia(100)	Clostridiales(100)	Clostridiales_unclassified(98)	Clostridiales_unclassified(98)	0	0	2	0	0	0	0	0	0	0	0	0	0	0	0	0	3	0	0	0	2	9	0	0	0	0	0	0	0	0	0	0	0	0	0	0	0	43	0	0	211	0	0
Otu00781	Bacteria(100)	Proteobacteria(100)	Alphaproteobacteria(100)	Rhizobiales(100)	Hyphomicrobiaceae(100)	Devosia(100)	0	3	0	0	0	0	2	0	0	0	0	0	0	13	0	0	0	13	1	0	0	0	0	0	0	0	0	0	0	0	0	0	0	0	0	5	0	147	30	0	0	0	0
Otu00872	Bacteria(100)	Proteobacteria(100)	Betaproteobacteria(100)	Burkholderiales(100)	Alcaligenaceae(100)	Pusillimonas(100)	0	0	0	0	0	0	0	0	0	0	0	0	0	0	0	0	0	0	0	0	0	0	0	0	0	0	0	0	0	0	0	0	0	0	0	0	0	0	0	0	0	0	0
Otu00873	Bacteria(100)	Firmicutes(100)	Bacilli(100)	Lactobacillales(100)	Streptococcaceae(100)	Streptococcus(100)	0	0	0	0	0	0	0	0	0	0	0	0	0	0	0	0	0	0	0	0	0	0	0	0	0	0	0	0	0	0	0	0	10	0	0	0	0	0	0	0	0	0	0
Otu00832	Bacteria(100)	Bacteria_unclassified(100)	Bacteria_unclassified(100)	Bacteria_unclassified(100)	Bacteria_unclassified(100)	Bacteria_unclassified(100)	1	0	0	0	5	0	0	0	0	0	0	0	0	0	0	0	0	0	0	0	0	0	0	0	0	0	0	0	0	0	0	0	0	0	0	0	0	20	0	0	0	0	44
Otu00870	Bacteria(100)	Actinobacteria(100)	Actinobacteria(100)	Actinomycetales(100)	Pseudonocardiaceae(52)	Pseudonocardiaceae_unclassified(52)	0	0	14	0	0	0	0	6	0	0	0	0	0	0	2	1	0	0	0	0	0	0	0	0	0	0	0	0	0	0	0	0	0	0	0	0	0	0	42	0	18	0	3
Otu00877	Bacteria(100)	Actinobacteria(100)	Actinobacteria(100)	Actinomycetales(100)	Actinomycetales_unclassified(100)	Actinomycetales_unclassified(100)	0	0	0	0	0	0	0	0	0	0	0	0	0	0	0	12	5	0	0	7	7	0	0	0	2	0	0	0	0	0	0	2	0	0	0	4	0	7	4	0	13	0	83
Otu00878	Bacteria(100)	Bacteria_unclassified(100)	Bacteria_unclassified(100)	Bacteria_unclassified(100)	Bacteria_unclassified(100)	Bacteria_unclassified(100)	0	0	0	0	0	0	0	0	0	0	0	0	0	409	0	0	0	0	0	0	0	0	0	0	0	0	0	0	0	0	0	0	0	0	0	0	0	0	0	0	0	0	0
Otu00875	Bacteria(100)	Proteobacteria(100)	Deltaproteobacteria(96)	Deltaproteobacteria_unclassified(96)	Deltaproteobacteria_unclassified(96)	Deltaproteobacteria_unclassified(96)	0	0	0	0	0	0	0	0	0	0	0	0	0	0	0	0	0	0	0	0	0	0	0	0	0	0	0	0	0	0	0	0	0	0	0	0	0	0	0	0	0	395	0
Otu00879	Bacteria(100)	Proteobacteria(100)	Alphaproteobacteria(100)	Rhodospirillales(100)	Acetobacteraceae(100)	Acetobacteraceae_unclassified(100)	0	0	0	0	0	0	0	0	39	0	0	0	0	0	0	0	0	0	0	0	0	0	0	0	4	0	0	0	0	0	0	0	0	0	0	0	0	20	19	0	8	0	61
Otu00880	Bacteria(100)	Proteobacteria(100)	Alphaproteobacteria(100)	Rhodospirillales(100)	Acetobacteraceae(100)	Acetobacteraceae_unclassified(100)	0	0	0	0	0	0	0	0	0	0	0	0	0	0	0	0	0	0	0	0	0	0	0	0	0	0	0	0	0	0	0	0	0	0	0	0	0	159	71	14	69	0	0
Otu00876	Bacteria(100)	Proteobacteria(100)	Betaproteobacteria(100)	Betaproteobacteria_unclassified(100)	Betaproteobacteria_unclassified(100)	Betaproteobacteria_unclassified(100)	0	0	0	0	0	0	0	0	0	0	0	0	0	0	0	0	0	0	0	0	0	0	0	0	0	0	0	0	0	0	0	0	0	0	0	0	0	0	0	0	0	0	0
Otu00881	Bacteria(100)	Bacteria_unclassified(62)	Bacteria_unclassified(62)	Bacteria_unclassified(62)	Bacteria_unclassified(62)	Bacteria_unclassified(62)	0	0	0	0	0	0	0	0	0	0	0	0	0	0	0	0	0	0	0	0	0	0	0	0	0	0	108	0	0	0	0	0	0	0	0	0	0	0	0	0	0	0	0
Otu00833	Bacteria(100)	Actinobacteria(100)	Actinobacteria(100)	Actinomycetales(100)	Corynebacteriaceae(100)	Corynebacterium(100)	9	20	0	0	0	0	1	34	2	0	0	0	0	0	0	0	0	0	0	0	0	0	0	0	0	0	0	0	0	0	0	0	0	0	0	0	0	0	0	0	0	0	107
Otu00882	Bacteria(100)	Verrucomicrobia(100)	Opitutae(100)	Opitutales(100)	Opitutaceae(100)	Opitutus(62)	0	0	0	0	0	0	0	0	0	0	0	0	0	0	0	0	0	0	0	0	0	0	0	0	0	0	0	0	0	0	0	0	0	0	0	0	0	0	0	0	0	0	0
Otu00883	Bacteria(100)	Acidobacteria(100)	Acidobacteria_Gp6(100)	Acidobacteria_Gp6_order_incertae_sedis(100)	Acidobacteria_Gp6_family_incertae_sedis(100)	Gp6(100)	0	0	0	0	0	0	0	0	0	0	0	0	0	10	0	0	0	0	0	0	0	0	0	0	0	0	0	0	0	0	0	0	0	0	0	0	0	0	0	0	0	0	0
Otu00884	Bacteria(100)	Firmicutes(100)	Firmicutes_unclassified(100)	Firmicutes_unclassified(100)	Firmicutes_unclassified(100)	Firmicutes_unclassified(100)	0	0	0	0	0	0	0	0	0	0	0	0	0	0	0	0	0	0	0	0	0	0	0	0	0	0	0	0	0	0	0	0	0	0	0	0	0	0	0	0	0	0	0
Otu00885	Bacteria(100)	Proteobacteria(100)	Alphaproteobacteria(100)	Rhodobacterales(100)	Rhodobacteraceae(100)	Amaricoccus(100)	0	0	0	0	0	0	0	0	0	0	0	0	0	0	0	0	0	0	0	0	0	0	0	0	0	0	0	0	0	0	0	0	0	0	0	0	0	0	0	0	0	0	0
Otu00886	Bacteria(100)	Proteobacteria(100)	Gammaproteobacteria(100)	Methylococcales(100)	Methylococcaceae(100)	Methylococcaceae_unclassified(100)	0	0	0	0	0	0	0	0	0	0	0	0	0	0	0	0	0	0	0	0	0	0	0	0	0	0	0	0	0	0	0	0	0	0	0	0	0	0	0	0	0	0	0
Otu00887	Bacteria(100)	Bacteroidetes(100)	Sphingobacteria(100)	Sphingobacteriales(100)	Cytophagaceae(100)	Arcicella(76)	0	0	0	0	0	0	0	0	0	0	0	0	0	0	43	0	1	0	0	0	0	0	2	0	0	0	49	0	0	0	0	0	0	0	0	0	0	3	0	0	5	0	0
Otu00889	Bacteria(100)	Firmicutes(100)	Bacilli(100)	Bacillales(100)	Paenibacillaceae_1(100)	Paenibacillus(100)	0	0	0	0	0	0	0	0	0	0	0	0	0	0	0	0	0	0	0	0	0	1	0	0	0	0	0	0	0	0	0	0	0	0	0	0	0	0	0	0	0	0	0
Otu00890	Bacteria(100)	Verrucomicrobia(100)	Verrucomicrobiae(100)	Verrucomicrobiales(100)	Verrucomicrobiaceae(100)	Prosthecobacter(100)	0	0	0	0	0	0	0	0	0	0	0	0	0	0	0	0	0	0	0	0	0	0	0	0	0	0	0	0	0	0	0	0	0	0	0	0	0	0	0	0	0	0	0
Otu00888	Bacteria(100)	Actinobacteria(100)	Actinobacteria(100)	Actinomycetales(100)	Micrococcaceae(100)	Micrococcaceae_unclassified(100)	0	0	0	1	0	0	0	0	0	0	0	0	0	0	0	0	0	0	0	0	0	0	0	0	0	0	0	0	0	0	0	0	0	0	0	0	0	0	0	0	0	0	0
Otu00891	Bacteria(100)	Bacteroidetes(100)	Bacteroidia(100)	Bacteroidales(100)	Porphyromonadaceae(100)	Porphyromonadaceae_unclassified(97)	0	0	0	0	0	0	0	0	0	0	0	0	0	0	0	0	0	0	0	0	0	0	0	0	0	0	0	0	0	0	0	0	0	0	0	0	0	0	2	0	0	0	0
Otu00893	Bacteria(100)	Proteobacteria(100)	Alphaproteobacteria(100)	Rhodospirillales(100)	Acetobacteraceae(100)	Acetobacteraceae_unclassified(95)	0	5	0	0	0	0	0	0	0	0	0	0	0	0	0	0	0	0	0	0	0	1	0	0	0	0	0	0	0	0	0	0	0	0	0	0	0	0	61	0	0	0	0
Otu00895	Bacteria(100)	Planctomycetes(100)	Planctomycetacia(100)	Planctomycetales(100)	Planctomycetaceae(100)	Singulisphaera(100)	0	0	0	0	0	0	0	0	0	0	0	0	0	0	0	0	0	0	0	0	0	0	0	0	0	0	0	0	0	0	0	0	0	0	0	0	0	204	126	0	77	0	0
Otu00899	Bacteria(100)	Actinobacteria(100)	Actinobacteria(100)	Actinomycetales(100)	Actinomycetaceae(100)	Actinomyces(100)	0	0	0	0	0	0	0	10	0	0	1	0	56	0	33	0	0	0	0	0	0	0	1	0	0	0	8	0	0	0	0	0	0	0	0	0	0	0	0	0	6	1	0
Otu00900	Bacteria(100)	Bacteria_unclassified(100)	Bacteria_unclassified(100)	Bacteria_unclassified(100)	Bacteria_unclassified(100)	Bacteria_unclassified(100)	0	0	0	0	0	0	0	0	0	0	0	0	0	0	0	0	0	0	0	0	0	0	0	0	0	0	0	0	0	0	0	0	0	0	0	0	0	0	0	0	0	0	0
Otu00901	Bacteria(100)	Bacteria_unclassified(100)	Bacteria_unclassified(100)	Bacteria_unclassified(100)	Bacteria_unclassified(100)	Bacteria_unclassified(100)	0	0	0	0	0	0	0	0	0	0	0	0	0	0	0	0	0	0	0	0	0	0	0	0	0	0	0	0	0	0	0	0	0	0	0	0	0	141	204	24	9	0	0
Otu00892	Bacteria(100)	Proteobacteria(100)	Alphaproteobacteria(100)	Sphingomonadales(100)	Sphingomonadaceae(100)	Sphingomonas(65)	2	0	0	0	0	0	0	0	0	0	0	0	12	2	0	0	0	0	0	0	0	0	0	0	0	0	0	0	0	0	0	0	0	0	0	0	0	2	0	0	45	0	0
Otu00902	Bacteria(100)	Bacteroidetes(100)	Sphingobacteria(89)	Sphingobacteriales(89)	Sphingobacteriales_unclassified(89)	Sphingobacteriales_unclassified(89)	0	0	0	0	0	0	0	0	0	0	0	0	0	0	237	0	14	0	0	0	0	0	0	0	0	0	0	0	0	0	0	0	0	0	0	0	0	0	0	0	0	0	0
Otu00903	Bacteria(100)	Proteobacteria(100)	Alphaproteobacteria(100)	Alphaproteobacteria_unclassified(100)	Alphaproteobacteria_unclassified(100)	Alphaproteobacteria_unclassified(100)	0	0	0	0	0	0	0	0	0	0	0	0	0	0	0	0	0	0	0	0	0	1	0	0	0	0	0	0	0	0	0	0	0	0	0	0	0	20	12	0	0	0	0
Otu00904	Bacteria(100)	Proteobacteria(100)	Gammaproteobacteria(100)	Legionellales(100)	Coxiellaceae(100)	Aquicella(100)	0	0	0	0	0	0	0	0	0	0	0	0	0	0	0	0	0	0	0	0	0	0	0	0	0	0	0	0	0	0	0	0	0	0	0	0	0	0	0	0	0	0	0
Otu00906	Bacteria(100)	Bacteria_unclassified(100)	Bacteria_unclassified(100)	Bacteria_unclassified(100)	Bacteria_unclassified(100)	Bacteria_unclassified(100)	0	0	0	0	0	0	0	0	0	0	0	0	0	0	0	0	0	0	0	0	0	0	0	0	0	0	0	0	0	0	0	0	0	0	0	0	0	0	0	0	0	0	0
Otu00907	Bacteria(100)	Bacteroidetes(100)	Flavobacteria(100)	Flavobacteriales(100)	Flavobacteriaceae(100)	Flavobacterium(100)	0	0	0	0	0	0	0	0	0	0	0	0	0	0	0	0	0	0	0	0	0	0	0	0	0	0	0	0	0	0	0	0	0	0	0	0	0	0	0	0	0	0	0
Otu00908	Bacteria(100)	Proteobacteria(75)	Deltaproteobacteria(75)	Bdellovibrionales(75)	Bdellovibrionaceae(75)	Vampirovibrio(75)	0	0	0	0	0	0	0	0	0	0	0	0	0	0	0	0	0	0	0	0	0	0	0	0	0	0	0	0	0	0	0	0	0	0	0	0	0	0	0	0	23	0	0
Otu00909	Bacteria(100)	Proteobacteria(100)	Gammaproteobacteria(100)	Xanthomonadales(100)	Sinobacteraceae(100)	Nevskia(100)	0	0	0	0	0	0	0	0	0	0	0	0	0	0	0	0	0	0	0	0	0	0	0	0	0	0	0	0	0	0	0	0	0	2	0	0	0	30	0	1	0	0	0
Otu00910	Bacteria(100)	Proteobacteria(100)	Alphaproteobacteria(100)	Rhizobiales(100)	Hyphomicrobiaceae(100)	Pedomicrobium(100)	0	0	0	0	0	0	0	0	0	0	0	0	0	0	0	2	2	0	0	0	0	0	0	0	4	0	0	0	0	0	0	0	0	0	0	0	0	80	0	0	3	0	0
Otu00874	Bacteria(100)	Actinobacteria(100)	Actinobacteria(100)	Actinomycetales(100)	Nocardioidaceae(100)	Nocardioides(100)	3	7	0	0	0	9	1	2	0	0	0	0	69	0	0	8	1	0	6	0	0	0	0	0	0	0	0	0	0	0	0	3	0	0	0	5	0	0	25	0	4	0	0
Otu00911	Bacteria(100)	Planctomycetes(100)	Planctomycetacia(100)	Planctomycetales(100)	Planctomycetaceae(100)	Singulisphaera(100)	0	0	0	0	0	0	0	0	0	0	0	0	0	0	0	0	0	0	0	0	0	0	0	0	0	0	0	0	0	0	0	0	0	0	0	0	0	91	184	0	95	0	0
Otu00914	Bacteria(100)	Bacteroidetes(100)	Sphingobacteria(100)	Sphingobacteriales(100)	Sphingobacteriales_unclassified(100)	Sphingobacteriales_unclassified(100)	0	0	0	0	0	0	0	0	0	0	0	0	0	0	0	0	0	0	0	0	0	0	0	0	0	0	0	0	0	0	0	0	0	0	0	0	0	0	0	0	0	0	0
Otu00912	Bacteria(100)	Proteobacteria(100)	Gammaproteobacteria(100)	Enterobacteriales(100)	Enterobacteriaceae(100)	Arsenophonus(100)	0	0	0	0	0	0	0	0	0	0	0	0	0	0	0	0	0	0	0	0	0	0	0	0	0	0	0	0	0	0	0	0	0	0	0	0	0	0	0	0	0	0	0
Otu00894	Bacteria(100)	Proteobacteria(100)	Alphaproteobacteria(100)	Rhodospirillales(100)	Acetobacteraceae(100)	Acidisoma(98)	0	0	0	0	0	0	0	0	0	0	0	0	0	0	0	0	0	0	0	0	0	0	0	0	0	0	0	0	0	0	0	0	0	0	0	0	0	18	171	0	116	0	9
Otu00915	Bacteria(100)	Proteobacteria(100)	Alphaproteobacteria(100)	Caulobacterales(100)	Caulobacteraceae(100)	Caulobacter(100)	0	0	0	0	0	0	0	0	4	0	0	0	0	0	0	0	0	0	0	0	0	0	0	0	0	0	0	0	0	0	0	0	0	0	0	0	0	4	0	0	6	0	0
Otu00916	Bacteria(100)	Proteobacteria(100)	Alphaproteobacteria(100)	Rhizobiales(100)	Methylobacteriaceae(100)	Methylobacterium(100)	0	0	0	0	0	0	0	0	0	0	0	0	0	0	0	0	0	0	0	0	0	0	0	0	0	0	0	0	0	0	0	0	0	0	0	0	0	70	255	0	7	0	0
Otu00897	Bacteria(100)	Proteobacteria(100)	Alphaproteobacteria(88)	Rhizobiales(88)	Rhizobiaceae(88)	Rhizobium(88)	0	0	0	0	0	0	0	0	1	0	0	0	0	0	0	0	0	4	0	0	0	0	0	0	7	0	0	0	0	0	0	0	0	0	0	0	0	0	0	0	0	0	0
Otu00917	Bacteria(100)	Bacteria_unclassified(100)	Bacteria_unclassified(100)	Bacteria_unclassified(100)	Bacteria_unclassified(100)	Bacteria_unclassified(100)	0	0	0	0	0	0	0	0	0	0	0	0	0	0	0	0	0	0	0	0	0	0	0	0	0	0	0	0	0	0	0	0	0	0	0	2	0	8	89	0	156	0	0
Otu00913	Bacteria(100)	Actinobacteria(100)	Actinobacteria(100)	Actinomycetales(100)	Actinomycetales_unclassified(100)	Actinomycetales_unclassified(100)	0	0	0	0	0	56	0	2	0	0	0	0	0	0	0	16	0	0	1	0	0	0	0	0	0	0	0	0	0	0	0	0	0	0	0	0	0	2	10	0	14	8	25
Otu00918	Bacteria(100)	Proteobacteria(100)	Alphaproteobacteria(100)	Rhizobiales(100)	Rhizobiales_unclassified(100)	Rhizobiales_unclassified(100)	0	0	0	0	0	0	0	0	0	0	0	0	0	0	0	0	0	0	0	0	0	0	0	0	0	0	0	0	0	0	0	0	0	0	0	0	0	0	0	0	23	0	61
Otu00922	Bacteria(100)	Proteobacteria(100)	Alphaproteobacteria(100)	Alphaproteobacteria_unclassified(99)	Alphaproteobacteria_unclassified(99)	Alphaproteobacteria_unclassified(99)	0	0	0	0	0	0	0	0	0	0	0	0	0	0	0	0	0	0	0	0	0	0	0	0	0	0	0	0	0	0	0	0	0	0	0	0	0	0	0	0	0	0	0
Otu00923	Bacteria(100)	Proteobacteria(100)	Betaproteobacteria(100)	Betaproteobacteria_unclassified(100)	Betaproteobacteria_unclassified(100)	Betaproteobacteria_unclassified(100)	0	19	0	0	0	0	0	0	0	0	0	0	0	0	0	0	0	0	0	0	0	0	0	0	0	0	0	0	0	0	0	0	0	0	0	0	0	0	0	0	4	0	0
Otu00734	Bacteria(100)	Firmicutes(100)	Bacilli(100)	Bacillales(100)	Paenibacillaceae_1(100)	Paenibacillus(80)	0	4	0	0	0	12	0	0	0	5	4	0	0	0	39	7	1	1	4	2	0	0	0	0	0	0	0	0	0	0	0	0	0	0	0	0	0	20	3	0	35	0	0
Otu00905	Bacteria(100)	Actinobacteria(100)	Actinobacteria(100)	Actinomycetales(100)	Nocardiaceae(100)	Rhodococcus(100)	0	8	0	0	0	23	0	0	0	0	0	0	0	0	0	0	0	0	0	0	0	2	0	0	2	0	0	0	0	0	8	4	8	3	0	3	0	26	0	0	24	0	0
Otu00925	Bacteria(100)	Proteobacteria(100)	Alphaproteobacteria(100)	Caulobacterales(100)	Caulobacteraceae(100)	Brevundimonas(100)	0	0	0	0	0	0	0	0	0	1	0	0	0	0	0	0	0	0	0	0	0	1	0	0	0	0	0	0	0	0	0	0	0	0	0	0	0	0	0	0	0	0	0
Otu00926	Bacteria(100)	Bacteroidetes(100)	Sphingobacteria(100)	Sphingobacteriales(100)	Chitinophagaceae(100)	Chitinophagaceae_unclassified(100)	0	0	0	0	0	0	0	0	0	0	0	0	0	0	0	0	0	0	0	0	0	0	0	0	2	0	0	0	0	0	0	0	0	0	0	0	0	0	0	0	0	0	0
Otu00919	Bacteria(100)	Bacteria_unclassified(100)	Bacteria_unclassified(100)	Bacteria_unclassified(100)	Bacteria_unclassified(100)	Bacteria_unclassified(100)	0	0	3	0	0	0	0	0	0	0	0	0	0	0	5	0	0	0	0	1	0	0	0	10	0	0	0	0	0	0	0	0	0	0	0	0	0	0	0	0	0	0	0
Otu00927	Bacteria(100)	Bacteria_unclassified(100)	Bacteria_unclassified(100)	Bacteria_unclassified(100)	Bacteria_unclassified(100)	Bacteria_unclassified(100)	0	0	0	0	0	0	0	0	0	0	0	0	0	0	0	1	0	0	4	0	0	0	0	0	0	0	0	0	0	0	0	0	0	0	0	0	0	0	0	0	0	0	0
Otu00928	Bacteria(100)	Bacteria_unclassified(100)	Bacteria_unclassified(100)	Bacteria_unclassified(100)	Bacteria_unclassified(100)	Bacteria_unclassified(100)	0	0	0	0	0	0	0	0	0	0	0	0	0	0	0	0	0	0	0	0	0	0	0	0	0	0	0	0	0	0	0	0	0	0	0	0	0	0	0	0	0	0	0
Otu00929	Bacteria(100)	Actinobacteria(100)	Actinobacteria(100)	Actinomycetales(100)	Nocardiaceae(71)	Nocardiaceae_unclassified(71)	0	0	0	0	0	0	0	0	0	0	0	0	0	0	0	0	0	0	0	0	0	0	0	0	0	0	0	0	0	0	0	0	0	0	0	0	0	0	0	0	0	0	0
Otu00930	Bacteria(100)	Firmicutes(88)	Clostridia(88)	Clostridiales(88)	Ruminococcaceae(88)	Ruminococcaceae_unclassified(88)	0	0	0	0	0	0	0	0	0	0	0	0	0	0	3	0	0	0	0	1	1	0	0	0	0	0	0	0	0	2	0	0	0	0	0	0	0	0	0	0	0	336	0
Otu00931	Bacteria(100)	Firmicutes(100)	Clostridia(100)	Clostridiales(100)	Ruminococcaceae(100)	Ruminococcaceae_unclassified(100)	0	0	0	0	0	0	0	0	0	0	0	0	0	0	0	0	0	0	0	0	0	0	0	0	0	0	0	0	0	0	0	0	0	0	0	0	0	301	54	10	20	0	0
Otu00932	Bacteria(100)	Bacteria_unclassified(100)	Bacteria_unclassified(100)	Bacteria_unclassified(100)	Bacteria_unclassified(100)	Bacteria_unclassified(100)	0	0	0	0	0	0	0	0	0	0	0	0	0	0	0	0	0	0	0	0	0	0	0	0	0	0	0	0	0	0	0	0	0	0	0	0	0	0	0	0	5	0	0
Otu00898	Bacteria(100)	Actinobacteria(100)	Actinobacteria(100)	Solirubrobacterales(100)	Solirubrobacterales_unclassified(100)	Solirubrobacterales_unclassified(100)	0	12	11	0	1	72	0	0	0	0	0	0	0	0	0	4	3	0	0	0	6	3	2	0	11	0	0	0	0	0	0	0	0	0	0	0	0	0	0	0	0	0	0
Otu00933	Bacteria(100)	Proteobacteria(100)	Alphaproteobacteria(100)	Rhodospirillales(100)	Acetobacteraceae(100)	Acetobacteraceae_unclassified(100)	0	0	0	0	0	0	0	0	0	0	0	0	0	0	0	0	0	0	0	0	0	0	0	0	0	0	0	0	0	0	0	0	0	0	0	0	0	0	0	0	7	347	0
Otu00934	Bacteria(100)	Actinobacteria(100)	Actinobacteria(100)	Actinomycetales(100)	Promicromonosporaceae(100)	Promicromonosporaceae_unclassified(100)	0	0	0	0	0	0	0	0	0	0	0	0	0	0	0	7	0	0	0	0	3	1	0	0	0	0	0	0	0	0	0	0	0	0	0	1	0	4	13	0	0	0	19
Otu00935	Bacteria(100)	Planctomycetes(100)	Planctomycetacia(100)	Planctomycetales(100)	Planctomycetaceae(100)	Singulisphaera(100)	0	0	0	0	0	0	0	0	0	0	0	0	0	0	0	0	0	0	0	0	0	0	2	0	0	0	0	0	0	0	0	0	0	0	0	0	0	0	0	0	0	0	0
Otu00896	Bacteria(100)	Proteobacteria(100)	Alphaproteobacteria(100)	Rhizobiales(100)	Rhizobiales_unclassified(58)	Rhizobiales_unclassified(58)	0	0	0	0	0	0	0	0	0	0	0	0	0	0	0	0	0	1	0	0	0	0	0	0	0	0	0	0	0	0	0	0	0	0	0	1	0	12	24	30	0	0	0
Otu00937	Bacteria(100)	Proteobacteria(100)	Alphaproteobacteria(100)	Rhizobiales(100)	Rhizobiales_unclassified(100)	Rhizobiales_unclassified(100)	0	0	0	0	0	0	0	0	0	0	0	0	0	0	0	0	0	0	0	0	0	0	0	0	0	0	0	0	0	0	0	0	0	0	0	0	0	0	0	0	0	0	0
Otu00938	Bacteria(100)	Proteobacteria(100)	Alphaproteobacteria(100)	Alphaproteobacteria_order_incertae_sedis(100)	Alphaproteobacteria_family_incertae_sedis(100)	Rhizomicrobium(79)	0	0	0	0	0	0	0	0	0	0	0	0	0	0	0	0	0	0	0	0	0	0	0	0	0	0	0	0	0	0	0	0	0	0	0	0	0	19	33	0	0	0	0
Otu00920	Bacteria(100)	Bacteroidetes(100)	Sphingobacteria(100)	Sphingobacteriales(100)	Chitinophagaceae(100)	Sediminibacterium(83)	0	0	0	0	0	0	0	0	0	0	0	0	0	0	0	0	0	0	0	0	0	0	0	0	0	0	0	0	0	0	0	0	0	0	0	0	0	0	0	0	0	0	0
Otu00940	Bacteria(100)	Bacteria_unclassified(100)	Bacteria_unclassified(100)	Bacteria_unclassified(100)	Bacteria_unclassified(100)	Bacteria_unclassified(100)	0	0	0	0	0	0	0	0	0	0	0	0	0	0	0	0	0	0	0	0	0	0	0	0	0	0	0	0	0	0	0	0	0	0	0	0	0	0	0	0	0	0	0
Otu00941	Bacteria(100)	Tenericutes(100)	Mollicutes(100)	Acholeplasmatales(100)	Acholeplasmataceae(100)	Acholeplasma(100)	0	0	0	0	0	0	0	0	0	0	0	0	0	0	377	0	0	0	0	0	0	0	0	0	0	0	0	0	0	0	0	0	0	0	0	0	0	0	0	0	0	0	0
Otu00943	Bacteria(100)	Deinococcus-Thermus(100)	Deinococci(100)	Deinococcales(100)	Trueperaceae(100)	Truepera(100)	0	62	0	0	0	0	0	0	0	0	0	0	0	0	0	0	0	0	0	0	0	0	0	0	0	0	0	0	0	0	0	0	0	0	0	0	0	89	0	0	23	0	0
Otu00944	Bacteria(100)	Firmicutes(100)	Clostridia(100)	Clostridiales(100)	Clostridiaceae_4(100)	Clostridiaceae_4_unclassified(100)	0	0	0	0	0	0	0	0	0	0	0	0	0	0	135	0	0	0	0	0	0	0	0	0	0	0	0	0	0	0	0	0	0	0	0	0	0	0	0	0	0	0	0
Otu00945	Bacteria(100)	Actinobacteria(100)	Actinobacteria(100)	Actinobacteria_unclassified(100)	Actinobacteria_unclassified(100)	Actinobacteria_unclassified(100)	0	0	0	0	1	0	0	0	249	0	0	0	0	0	0	4	0	0	0	0	3	1	0	0	1	0	0	0	0	0	0	5	0	1	0	5	0	0	11	0	0	0	0
Otu00946	Bacteria(100)	Proteobacteria(100)	Alphaproteobacteria(100)	Rhodospirillales(100)	Acetobacteraceae(100)	Acetobacteraceae_unclassified(67)	0	0	0	0	0	30	0	0	0	0	0	0	0	0	0	0	0	0	0	0	0	0	0	0	0	0	0	0	0	0	0	0	0	0	0	0	0	243	0	0	70	0	0
Otu00948	Bacteria(100)	Proteobacteria(100)	Gammaproteobacteria(100)	Alteromonadales(100)	Shewanellaceae(100)	Shewanella(100)	0	0	0	0	0	0	0	0	0	0	0	0	0	0	372	0	0	0	0	0	0	0	0	0	0	0	0	0	0	0	0	0	0	0	0	0	0	0	0	0	0	0	0
Otu00949	Bacteria(100)	Fusobacteria(100)	Fusobacteria(100)	Fusobacteriales(100)	Fusobacteriaceae(100)	Fusobacterium(100)	0	0	0	0	0	0	0	0	0	0	0	0	0	0	0	0	0	0	0	0	0	0	0	0	0	0	0	0	0	0	0	4	0	0	0	0	0	0	0	0	0	0	0
Otu00950	Bacteria(100)	Bacteria_unclassified(100)	Bacteria_unclassified(100)	Bacteria_unclassified(100)	Bacteria_unclassified(100)	Bacteria_unclassified(100)	0	0	0	0	0	0	0	0	0	0	0	0	0	0	0	0	0	0	0	0	1	0	0	0	0	0	0	0	0	0	0	5	0	0	0	0	0	24	0	0	126	0	132
Otu00951	Bacteria(100)	Proteobacteria(100)	Gammaproteobacteria(100)	Pseudomonadales(100)	Pseudomonadaceae(100)	Pseudomonas(100)	0	0	0	0	0	0	0	0	0	0	0	0	0	0	0	0	0	0	0	0	0	0	0	0	0	0	0	0	0	0	0	0	0	0	0	0	0	0	0	0	0	0	0
Otu00952	Bacteria(100)	Bacteria_unclassified(100)	Bacteria_unclassified(100)	Bacteria_unclassified(100)	Bacteria_unclassified(100)	Bacteria_unclassified(100)	0	0	0	0	0	0	0	0	0	0	0	0	0	0	0	0	0	0	0	0	0	0	0	0	0	0	0	0	0	0	0	0	0	0	0	0	0	0	0	0	0	0	0
Otu00953	Bacteria(100)	Actinobacteria(100)	Actinobacteria(100)	Actinomycetales(100)	Nocardioidaceae(100)	Nocardioides(100)	0	29	0	0	3	3	0	8	0	0	0	0	0	0	0	10	5	0	0	0	2	3	0	0	0	0	0	0	0	0	0	0	0	0	0	0	0	0	0	0	1	0	0
Otu00954	Bacteria(100)	Proteobacteria(100)	Alphaproteobacteria(100)	Rhizobiales(100)	Rhizobiales_unclassified(95)	Rhizobiales_unclassified(95)	0	4	0	0	0	0	0	0	0	0	0	0	0	8	0	1	0	0	0	0	2	1	0	0	0	0	0	0	0	0	0	0	0	0	0	0	0	0	0	0	19	0	0
Otu00955	Bacteria(100)	Planctomycetes(100)	Planctomycetacia(100)	Planctomycetales(100)	Planctomycetaceae(100)	Singulisphaera(100)	0	0	0	0	0	0	0	0	0	0	0	0	0	0	0	0	3	0	0	7	3	9	8	0	4	0	0	0	0	0	0	0	0	0	0	0	0	0	0	0	0	0	0
Otu00957	Bacteria(100)	Proteobacteria(100)	Proteobacteria_unclassified(100)	Proteobacteria_unclassified(100)	Proteobacteria_unclassified(100)	Proteobacteria_unclassified(100)	0	0	0	0	0	0	0	0	0	0	0	0	0	0	0	0	0	0	0	0	0	0	0	0	0	0	0	0	0	0	0	0	0	0	0	0	0	0	0	0	0	0	0
Otu00958	Bacteria(100)	Bacteria_unclassified(100)	Bacteria_unclassified(100)	Bacteria_unclassified(100)	Bacteria_unclassified(100)	Bacteria_unclassified(100)	0	0	0	0	0	0	0	0	328	0	0	0	0	0	0	0	0	0	0	0	0	0	0	0	0	0	0	0	0	0	0	0	0	0	0	0	0	0	0	0	0	0	0
Otu00959	Bacteria(100)	Firmicutes(100)	Clostridia(100)	Clostridiales(100)	Clostridiales_unclassified(100)	Clostridiales_unclassified(100)	0	0	0	0	0	0	0	0	0	0	0	0	0	0	0	0	1	0	0	0	0	0	0	0	0	0	25	0	0	0	0	0	0	0	0	0	0	0	0	0	0	0	0
Otu00960	Bacteria(100)	Acidobacteria(100)	Acidobacteria_Gp6(100)	Acidobacteria_Gp6_order_incertae_sedis(100)	Acidobacteria_Gp6_family_incertae_sedis(100)	Gp6(100)	0	0	0	0	0	0	0	0	0	0	0	0	0	8	0	0	0	0	0	0	0	0	0	0	0	0	0	0	0	0	0	0	0	0	0	0	0	46	0	0	42	0	0
Otu00961	Bacteria(100)	Planctomycetes(100)	Planctomycetacia(100)	Planctomycetales(100)	Planctomycetaceae(100)	Singulisphaera(100)	0	0	0	0	0	0	0	0	0	0	0	0	0	0	0	0	0	0	0	0	2	0	0	0	0	0	0	0	0	0	0	0	0	0	0	0	0	62	93	0	41	0	0
Otu00962	Bacteria(100)	Firmicutes(100)	Bacilli(100)	Bacillales(100)	Bacillaceae_1(100)	Bacillaceae_1_unclassified(100)	0	0	0	0	0	0	0	0	0	0	0	0	0	0	0	0	0	0	0	0	0	0	0	0	0	0	0	0	0	0	0	0	0	0	0	0	0	0	0	0	0	0	0
Otu00963	Bacteria(100)	Bacteroidetes(100)	Bacteroidetes_unclassified(100)	Bacteroidetes_unclassified(100)	Bacteroidetes_unclassified(100)	Bacteroidetes_unclassified(100)	0	0	0	0	0	0	0	0	0	0	0	0	0	0	0	0	0	0	0	0	0	0	0	0	0	0	0	0	2	0	0	0	0	0	0	0	0	0	0	0	38	0	0
Otu00964	Bacteria(100)	OD1(100)	OD1_class_incertae_sedis(100)	OD1_order_incertae_sedis(100)	OD1_family_incertae_sedis(100)	OD1_genus_incertae_sedis(100)	0	0	0	0	0	0	0	0	0	0	0	0	0	0	0	0	0	0	0	0	0	0	0	0	0	0	0	0	0	0	0	0	0	0	0	0	0	0	0	0	0	0	0
Otu00966	Bacteria(100)	Firmicutes(100)	Clostridia(100)	Clostridiales(100)	Clostridiales_unclassified(59)	Clostridiales_unclassified(59)	0	0	0	0	0	0	0	0	0	0	0	0	0	0	0	0	0	0	0	0	2	0	0	0	0	0	0	0	0	0	0	0	0	0	0	0	0	86	20	117	7	0	0
Otu00956	Bacteria(100)	Bacteroidetes(100)	Flavobacteria(100)	Flavobacteriales(100)	Flavobacteriaceae(100)	Flavobacterium(100)	0	5	0	0	0	24	0	0	0	0	0	0	0	0	0	0	3	0	15	0	0	0	0	0	0	0	0	0	0	0	0	0	0	0	0	9	0	0	1	0	0	117	23
Otu00968	Bacteria(100)	Firmicutes(100)	Negativicutes(100)	Selenomonadales(100)	Veillonellaceae(100)	Dialister(100)	0	0	0	0	0	0	0	0	0	0	0	0	0	31	0	0	0	0	0	0	0	0	0	0	0	0	0	0	0	0	0	0	0	0	0	0	0	0	0	0	0	0	0
Otu00969	Bacteria(100)	Actinobacteria(100)	Actinobacteria(100)	Actinomycetales(100)	Actinomycetales_unclassified(100)	Actinomycetales_unclassified(100)	0	0	0	0	0	0	0	0	0	0	0	0	0	0	0	0	0	0	0	0	0	0	0	0	0	0	0	0	0	0	0	0	0	0	0	0	0	0	0	0	0	0	1
Otu00970	Bacteria(100)	Proteobacteria(100)	Betaproteobacteria(100)	Burkholderiales(100)	Burkholderiales_unclassified(73)	Burkholderiales_unclassified(73)	0	0	0	0	0	0	0	0	41	0	0	0	0	0	0	0	0	0	1	0	0	0	0	0	0	0	0	0	0	0	0	0	0	0	0	0	0	0	0	0	0	0	35
Otu00971	Bacteria(100)	Bacteroidetes(100)	Sphingobacteria(100)	Sphingobacteriales(100)	Cytophagaceae(100)	Cytophaga(100)	0	0	0	0	0	0	0	0	0	0	0	0	0	0	0	0	0	0	0	0	5	0	0	0	0	3	255	0	0	0	0	0	0	0	0	0	0	1	0	0	0	0	0
Otu00972	Bacteria(100)	Actinobacteria(100)	Actinobacteria(100)	Actinomycetales(100)	Nakamurellaceae(100)	Nakamurellaceae_unclassified(94)	0	0	0	0	0	0	1	0	0	0	0	27	36	0	0	1	0	0	0	0	0	0	0	0	1	0	0	0	0	0	0	2	0	0	0	0	0	137	54	0	0	0	5
Otu00973	Bacteria(100)	Firmicutes(100)	Erysipelotrichia(100)	Erysipelotrichales(100)	Erysipelotrichaceae(100)	Clostridium_XVIII(100)	0	0	0	0	0	0	0	0	0	0	0	0	0	0	0	1	0	0	0	0	0	2	0	0	0	0	0	0	0	0	0	0	0	0	0	0	0	59	59	0	0	0	155
Otu00974	Bacteria(100)	Firmicutes(100)	Clostridia(100)	Clostridiales(100)	Clostridiaceae_1(100)	Clostridium_sensu_stricto(100)	0	0	0	0	0	0	0	0	0	0	0	0	0	0	0	0	0	0	0	0	0	0	0	0	0	0	0	0	0	0	0	0	0	0	0	0	0	0	0	0	0	0	0
Otu00975	Bacteria(100)	Proteobacteria(100)	Alphaproteobacteria(100)	Caulobacterales(100)	Caulobacteraceae(100)	Asticcacaulis(100)	0	3	0	0	0	0	0	0	0	0	0	0	0	0	0	0	0	0	0	0	0	0	0	0	3	0	0	0	0	0	0	0	0	0	0	0	0	0	0	0	0	0	0
Otu00976	Bacteria(100)	Bacteria_unclassified(100)	Bacteria_unclassified(100)	Bacteria_unclassified(100)	Bacteria_unclassified(100)	Bacteria_unclassified(100)	0	0	0	0	0	0	0	0	0	0	0	0	0	0	0	1	0	0	0	3	2	7	0	0	0	0	0	0	0	0	0	0	0	0	0	0	0	0	0	0	0	0	0
Otu00979	Bacteria(100)	Proteobacteria(100)	Gammaproteobacteria(100)	Gammaproteobacteria_order_incertae_sedis(99)	Gammaproteobacteria_family_incertae_sedis(99)	Gammaproteobacteria_family_incertae_sedis_unclassified(99)	0	0	0	0	0	0	0	0	0	0	0	0	0	0	0	0	0	0	0	0	0	0	0	0	0	0	0	0	0	0	0	0	0	0	0	0	0	0	0	0	0	0	0
Otu00980	Bacteria(100)	Bacteria_unclassified(100)	Bacteria_unclassified(100)	Bacteria_unclassified(100)	Bacteria_unclassified(100)	Bacteria_unclassified(100)	0	0	0	0	0	0	0	0	0	0	0	0	0	0	0	0	0	0	0	0	0	0	0	0	0	0	0	0	0	0	0	0	0	0	0	0	0	0	0	0	0	0	1
Otu00983	Bacteria(100)	Bacteroidetes(100)	Bacteroidetes_unclassified(100)	Bacteroidetes_unclassified(100)	Bacteroidetes_unclassified(100)	Bacteroidetes_unclassified(100)	0	0	0	0	0	0	0	0	0	0	0	0	0	0	0	0	0	0	0	0	0	0	0	0	3	0	0	0	0	0	0	0	0	0	0	0	0	0	0	0	0	0	0
Otu00982	Bacteria(100)	Firmicutes(100)	Clostridia(100)	Clostridiales(100)	Lachnospiraceae(100)	Lachnospiraceae_unclassified(97)	0	0	0	0	0	0	0	0	0	0	0	0	0	0	0	0	0	0	0	4	14	26	11	2	17	0	0	0	0	0	0	0	0	0	0	0	31	0	0	0	0	0	0
Otu00985	Bacteria(100)	Bacteroidetes(100)	Sphingobacteria(99)	Sphingobacteriales(99)	Sphingobacteriales_unclassified(99)	Sphingobacteriales_unclassified(99)	0	0	0	0	0	0	0	0	0	0	0	0	0	0	0	0	2	0	0	0	0	0	0	4	0	0	0	0	0	0	0	0	0	0	0	0	0	0	0	0	0	0	0
Otu00986	Bacteria(100)	Bacteroidetes(100)	Sphingobacteria(100)	Sphingobacteriales(100)	Cytophagaceae(100)	Hymenobacter(97)	0	0	0	0	0	0	0	0	0	0	0	0	0	0	0	0	0	0	0	0	0	0	0	0	0	0	0	0	0	0	0	0	0	0	0	0	0	79	0	0	117	0	121
Otu00978	Bacteria(100)	Proteobacteria(100)	Alphaproteobacteria(100)	Rhizobiales(100)	Rhizobiales_unclassified(100)	Rhizobiales_unclassified(100)	0	0	0	0	0	0	0	0	0	0	0	0	0	2	0	0	0	0	0	0	0	0	0	0	0	0	0	0	0	0	0	0	0	0	0	0	0	89	0	0	15	0	19
Otu00987	Bacteria(100)	Bacteroidetes(100)	Flavobacteria(100)	Flavobacteriales(100)	Flavobacteriaceae(100)	Flavobacteriaceae_unclassified(100)	0	0	0	0	0	0	0	0	0	0	0	0	0	0	0	0	0	0	0	0	0	0	0	0	0	0	0	0	0	0	0	0	0	0	0	0	0	0	0	0	0	0	0
Otu00989	Bacteria(100)	Firmicutes(100)	Clostridia(100)	Clostridiales(100)	Clostridiaceae_1(100)	Clostridium_sensu_stricto(100)	0	0	0	0	0	0	0	0	0	0	0	0	0	0	0	0	0	0	8	0	0	0	0	0	0	0	3	0	0	0	0	0	0	0	0	0	0	0	0	0	0	0	0
Otu00990	Bacteria(100)	Bacteria_unclassified(100)	Bacteria_unclassified(100)	Bacteria_unclassified(100)	Bacteria_unclassified(100)	Bacteria_unclassified(100)	0	0	0	0	0	0	0	0	0	0	0	0	0	0	0	0	0	0	0	0	0	0	0	0	0	0	0	0	0	0	0	0	0	0	0	0	0	0	0	0	27	0	28
Otu00942	Bacteria(100)	Deinococcus-Thermus(100)	Deinococci(100)	Deinococcales(100)	Deinococcaceae(100)	Deinococcus(100)	0	0	7	0	0	0	2	0	240	0	0	0	0	0	0	0	0	0	0	0	0	0	0	0	0	0	0	0	0	0	0	0	0	0	0	0	0	0	0	0	8	0	0
Otu00992	Bacteria(100)	Bacteria_unclassified(100)	Bacteria_unclassified(100)	Bacteria_unclassified(100)	Bacteria_unclassified(100)	Bacteria_unclassified(100)	0	0	0	0	0	0	0	0	0	0	0	0	0	0	0	0	0	0	0	0	0	0	0	0	0	0	1	0	0	0	0	0	0	0	0	0	0	0	0	0	0	0	0
Otu00993	Bacteria(100)	Planctomycetes(100)	Planctomycetacia(100)	Planctomycetales(100)	Planctomycetaceae(100)	Singulisphaera(100)	0	0	0	0	0	0	0	0	0	0	0	0	0	0	0	0	0	0	0	2	0	0	0	0	0	0	0	0	0	0	0	0	0	0	0	0	0	100	122	0	19	0	0
Otu00994	Bacteria(100)	Bacteria_unclassified(100)	Bacteria_unclassified(100)	Bacteria_unclassified(100)	Bacteria_unclassified(100)	Bacteria_unclassified(100)	0	0	0	0	0	0	0	0	0	0	0	0	0	0	0	0	0	0	0	0	0	0	0	0	0	0	0	0	0	0	0	0	0	0	0	0	0	0	0	0	0	0	0
Otu00939	Bacteria(100)	Firmicutes(100)	Clostridia(100)	Clostridiales(100)	Peptostreptococcaceae(100)	Clostridium_XI(100)	0	0	0	0	0	0	0	0	0	0	0	0	0	0	0	0	0	0	0	0	0	0	0	0	0	0	0	0	0	0	0	0	0	0	0	0	0	0	0	0	0	0	0
Otu00995	Bacteria(100)	Bacteria_unclassified(100)	Bacteria_unclassified(100)	Bacteria_unclassified(100)	Bacteria_unclassified(100)	Bacteria_unclassified(100)	0	0	0	0	0	0	0	0	0	0	0	0	0	0	0	0	0	0	0	0	0	0	0	0	0	0	0	0	0	0	0	0	0	0	0	0	0	0	0	0	0	0	0
Otu00997	Bacteria(100)	Actinobacteria(100)	Actinobacteria(100)	Actinomycetales(100)	Actinomycetaceae(100)	Actinomyces(100)	2	0	0	0	0	0	0	0	0	0	1	0	0	0	65	0	3	0	0	0	0	0	0	0	0	0	0	0	0	0	0	0	0	0	0	0	0	0	0	0	0	0	0
Otu00965	Bacteria(100)	Proteobacteria(100)	Alphaproteobacteria(100)	Alphaproteobacteria_unclassified(100)	Alphaproteobacteria_unclassified(100)	Alphaproteobacteria_unclassified(100)	0	18	0	0	0	0	0	0	0	0	0	0	0	2	0	0	0	0	0	0	0	0	3	0	9	0	1	0	0	0	0	0	0	0	0	0	0	6	0	0	15	0	0
Otu00998	Bacteria(100)	Proteobacteria(100)	Alphaproteobacteria(100)	Rhodospirillales(100)	Acetobacteraceae(100)	Acetobacteraceae_unclassified(100)	0	0	0	0	0	0	0	0	0	0	0	0	0	0	0	0	0	0	0	0	0	0	0	0	0	0	0	0	0	0	0	0	0	0	0	0	0	35	202	50	3	0	0
Otu00999	Bacteria(100)	Firmicutes(100)	Clostridia(100)	Clostridiales(100)	Peptostreptococcaceae(100)	Peptostreptococcus(100)	0	0	0	0	0	0	0	0	0	0	0	0	0	1	0	0	0	0	0	0	0	0	0	0	0	0	0	0	0	0	0	0	0	0	0	0	0	21	182	0	19	0	105
Otu01000	Bacteria(100)	Bacteroidetes(100)	Bacteroidetes_unclassified(100)	Bacteroidetes_unclassified(100)	Bacteroidetes_unclassified(100)	Bacteroidetes_unclassified(100)	0	0	0	0	0	0	0	0	0	0	0	0	0	0	0	0	0	0	0	0	0	0	0	0	0	0	0	0	0	0	0	0	0	0	0	0	0	0	0	0	0	0	0
Otu00988	Bacteria(100)	Bacteria_unclassified(100)	Bacteria_unclassified(100)	Bacteria_unclassified(100)	Bacteria_unclassified(100)	Bacteria_unclassified(100)	0	0	0	0	0	0	0	0	0	0	0	0	0	0	0	0	0	0	0	0	0	0	0	0	0	0	0	0	0	0	0	0	0	0	0	0	0	0	0	0	39	0	0
Otu01001	Bacteria(100)	Bacteroidetes(100)	Flavobacteria(100)	Flavobacteriales(100)	Flavobacteriaceae(100)	Flavobacterium(100)	0	0	0	0	0	0	0	0	0	0	0	0	0	0	0	0	2	0	0	0	0	0	0	0	0	0	0	0	0	0	0	0	0	0	0	0	0	0	0	0	0	0	0
Otu01002	Bacteria(100)	Bacteroidetes(100)	Bacteroidetes_unclassified(100)	Bacteroidetes_unclassified(100)	Bacteroidetes_unclassified(100)	Bacteroidetes_unclassified(100)	0	0	0	0	0	0	0	0	0	0	0	0	0	0	0	0	0	0	0	0	0	0	0	0	0	0	0	0	0	0	0	0	0	0	0	0	0	0	0	0	0	0	0
Otu01003	Bacteria(100)	Firmicutes(100)	Clostridia(100)	Clostridiales(100)	Lachnospiraceae(100)	Clostridium_XlVb(98)	0	0	0	0	0	0	0	0	0	0	0	0	0	0	0	0	0	0	1	0	4	4	0	0	0	0	0	0	0	0	0	0	0	0	0	0	0	272	6	0	0	0	0
Otu01004	Bacteria(100)	Planctomycetes(100)	Planctomycetacia(100)	Planctomycetales(100)	Planctomycetaceae(100)	Planctomycetaceae_unclassified(100)	0	0	0	0	0	0	0	0	0	0	0	0	0	0	0	0	0	0	0	0	0	0	0	0	4	0	0	0	0	0	0	0	0	0	0	0	0	24	128	0	17	0	0
Otu01005	Bacteria(100)	Bacteria_unclassified(100)	Bacteria_unclassified(100)	Bacteria_unclassified(100)	Bacteria_unclassified(100)	Bacteria_unclassified(100)	0	0	0	0	0	0	0	0	0	0	0	0	0	0	0	0	0	0	0	0	0	0	0	0	0	0	0	0	0	0	0	0	0	0	0	0	0	0	0	0	0	0	0
Otu00977	Bacteria(100)	Proteobacteria(100)	Deltaproteobacteria(100)	Desulfovibrionales(100)	Desulfovibrionaceae(99)	Desulfovibrio(99)	1	0	0	0	0	0	0	0	0	0	0	0	0	0	0	0	0	0	0	0	0	0	0	0	0	0	0	0	0	0	0	0	0	0	0	0	0	0	0	0	0	0	0
Otu01006	Bacteria(100)	Bacteroidetes(100)	Bacteroidia(100)	Bacteroidales(100)	Bacteroidales_unclassified(100)	Bacteroidales_unclassified(100)	0	0	0	0	0	0	0	0	0	0	0	0	0	0	0	0	0	0	0	0	0	0	0	0	0	0	0	0	0	0	0	0	0	0	0	0	0	0	0	0	0	0	0
Otu01007	Bacteria(100)	Acidobacteria(100)	Acidobacteria_Gp3(100)	Acidobacteria_Gp3_order_incertae_sedis(99)	Acidobacteria_Gp3_family_incertae_sedis(99)	Gp3(99)	0	0	0	0	0	0	0	0	0	0	0	0	0	1	0	0	0	0	0	0	0	0	0	0	0	0	0	0	0	0	0	0	0	0	0	0	0	0	0	0	0	0	114
Otu01008	Bacteria(100)	Bacteria_unclassified(100)	Bacteria_unclassified(100)	Bacteria_unclassified(100)	Bacteria_unclassified(100)	Bacteria_unclassified(100)	0	0	0	0	0	0	0	0	0	0	0	0	0	0	0	0	0	0	0	0	0	0	0	0	0	0	0	0	0	0	0	0	0	0	0	0	343	0	0	0	0	0	0
Otu01009	Bacteria(100)	Bacteria_unclassified(100)	Bacteria_unclassified(100)	Bacteria_unclassified(100)	Bacteria_unclassified(100)	Bacteria_unclassified(100)	0	0	0	0	0	0	0	0	0	0	0	0	0	0	0	0	0	0	0	0	0	0	0	0	0	0	0	0	0	0	0	0	0	0	0	0	0	0	0	0	0	0	0
Otu01010	Bacteria(100)	Proteobacteria(100)	Betaproteobacteria(100)	Burkholderiales(100)	Comamonadaceae(100)	Rhodoferax(61)	0	0	20	0	0	0	0	0	0	0	0	0	0	0	0	0	0	0	6	1	4	0	0	0	0	2	0	4	0	0	0	0	0	0	0	0	0	0	0	0	3	0	0
Otu00967	Bacteria(100)	Proteobacteria(100)	Alphaproteobacteria(100)	Sphingomonadales(100)	Sphingomonadaceae(100)	Sphingomonas(97)	0	0	0	0	0	0	2	0	0	0	0	0	0	0	0	0	0	0	0	0	0	0	0	0	0	0	0	0	0	0	0	0	0	0	0	0	0	0	0	0	5	0	0
Otu01012	Bacteria(100)	Planctomycetes(100)	Planctomycetacia(100)	Planctomycetales(100)	Planctomycetaceae(100)	Planctomycetaceae_unclassified(100)	0	0	0	0	0	0	0	0	0	0	0	1	328	0	0	0	0	0	0	0	0	0	0	0	0	0	0	0	0	0	0	0	0	0	0	0	0	0	0	0	0	0	0
Otu01013	Bacteria(100)	Bacteria_unclassified(100)	Bacteria_unclassified(100)	Bacteria_unclassified(100)	Bacteria_unclassified(100)	Bacteria_unclassified(100)	0	0	0	0	0	0	0	0	0	0	0	0	0	0	0	0	0	0	0	0	0	0	0	0	0	0	0	0	0	0	0	0	0	0	0	0	0	0	0	0	0	0	0
Otu01014	Bacteria(100)	Proteobacteria(100)	Betaproteobacteria(100)	Betaproteobacteria_unclassified(100)	Betaproteobacteria_unclassified(100)	Betaproteobacteria_unclassified(100)	0	0	0	0	0	0	0	0	0	0	0	0	0	3	0	0	0	0	0	0	0	0	0	0	0	0	0	0	0	0	0	0	0	0	0	0	0	0	0	0	0	0	0
Otu01011	Bacteria(100)	Planctomycetes(100)	Planctomycetacia(100)	Planctomycetales(100)	Planctomycetaceae(100)	Planctomyces(100)	0	0	0	0	0	0	0	0	0	0	0	0	0	8	0	0	0	0	0	0	0	0	0	0	1	0	0	0	0	0	0	0	0	0	0	0	0	0	0	0	5	0	0
Otu01016	Bacteria(100)	Proteobacteria(100)	Alphaproteobacteria(100)	Rhodobacterales(100)	Rhodobacteraceae(100)	Rubellimicrobium(95)	0	0	0	0	0	0	0	15	0	0	0	0	0	0	0	0	0	0	0	0	0	0	0	0	0	0	4	0	0	0	0	0	0	0	0	0	0	0	0	0	0	0	0
Otu01017	Bacteria(100)	Firmicutes(100)	Clostridia(100)	Clostridiales(100)	Peptostreptococcaceae(100)	Clostridium_XI(100)	0	95	0	15	0	204	0	0	0	0	0	0	0	0	0	0	0	0	0	0	0	0	0	0	0	0	0	0	0	0	0	0	0	0	0	0	0	0	0	0	0	0	0
Otu01018	Bacteria(100)	Actinobacteria(100)	Actinobacteria(100)	Actinomycetales(100)	Actinomycetales_unclassified(100)	Actinomycetales_unclassified(100)	0	0	0	0	0	0	0	0	0	0	0	0	0	0	0	0	0	0	0	0	0	0	0	0	0	2	0	0	0	0	0	0	0	0	0	0	0	0	0	0	0	0	0
Otu01019	Bacteria(100)	Bacteroidetes(100)	Bacteroidetes_unclassified(100)	Bacteroidetes_unclassified(100)	Bacteroidetes_unclassified(100)	Bacteroidetes_unclassified(100)	0	0	0	0	0	0	0	0	0	0	0	0	0	0	0	0	0	0	0	0	0	0	0	0	0	0	0	0	0	0	0	0	0	0	0	0	0	0	0	0	0	0	0
Otu01020	Bacteria(100)	Planctomycetes(100)	Planctomycetacia(100)	Planctomycetales(100)	Planctomycetaceae(100)	Singulisphaera(100)	0	0	0	0	0	0	0	0	0	0	0	0	0	0	0	0	0	0	0	0	0	1	4	0	2	0	0	0	0	0	0	0	0	0	0	0	0	15	15	0	141	0	0
Otu01015	Bacteria(100)	Actinobacteria(100)	Actinobacteria(100)	Solirubrobacterales(100)	Solirubrobacteraceae(100)	Solirubrobacter(100)	0	0	0	0	8	52	0	0	0	0	0	0	71	0	0	8	3	1	0	1	4	3	0	0	3	0	0	0	0	0	0	0	0	0	0	0	0	5	11	0	33	0	2
Otu01022	Bacteria(100)	Proteobacteria(100)	Alphaproteobacteria(100)	Caulobacterales(100)	Caulobacteraceae(100)	Caulobacteraceae_unclassified(80)	0	0	0	0	0	0	0	0	0	0	0	0	0	0	0	0	0	0	0	0	0	0	0	0	0	0	0	0	0	0	0	0	0	0	0	0	0	55	0	0	114	0	0
Otu01023	Bacteria(100)	Bacteria_unclassified(55)	Bacteria_unclassified(55)	Bacteria_unclassified(55)	Bacteria_unclassified(55)	Bacteria_unclassified(55)	0	0	0	0	0	0	0	0	0	0	0	8	0	0	0	2	5	2	0	0	0	0	3	0	0	0	0	0	0	0	0	0	0	0	0	1	0	57	69	0	29	0	53
Otu01024	Bacteria(100)	Proteobacteria(100)	Deltaproteobacteria(100)	Deltaproteobacteria_unclassified(100)	Deltaproteobacteria_unclassified(100)	Deltaproteobacteria_unclassified(100)	0	0	0	0	0	0	0	0	0	0	0	0	0	0	0	0	0	0	0	0	0	0	0	0	0	0	0	0	0	0	0	0	0	0	0	0	0	0	0	0	0	308	0
Otu01026	Bacteria(100)	Firmicutes(100)	Clostridia(100)	Clostridiales(100)	Lachnospiraceae(100)	Lachnospiraceae_unclassified(100)	0	0	0	0	0	0	0	0	0	0	0	0	0	0	0	0	0	0	0	0	0	0	0	0	0	0	0	0	0	0	0	0	0	0	0	0	0	0	0	0	0	0	0
Otu01027	Bacteria(100)	Bacteroidetes(100)	Bacteroidetes_unclassified(100)	Bacteroidetes_unclassified(100)	Bacteroidetes_unclassified(100)	Bacteroidetes_unclassified(100)	0	0	0	0	0	0	0	0	0	0	0	0	0	0	0	0	0	0	0	0	0	0	0	0	0	0	0	0	0	0	0	0	0	0	0	0	0	0	0	0	44	0	0
Otu01028	Bacteria(100)	Bacteroidetes(100)	Sphingobacteria(51)	Sphingobacteriales(51)	Sphingobacteriales_unclassified(51)	Sphingobacteriales_unclassified(51)	0	0	0	0	0	0	0	0	0	0	0	0	0	0	0	0	0	0	0	0	0	0	0	0	0	0	0	0	0	0	0	0	0	0	0	0	0	0	0	0	20	0	0
Otu01030	Bacteria(100)	Firmicutes(100)	Negativicutes(100)	Selenomonadales(100)	Veillonellaceae(100)	Megamonas(100)	0	0	0	0	0	0	0	0	0	0	0	0	0	0	0	0	0	0	5	0	0	0	0	0	0	0	0	0	0	0	0	0	0	0	0	0	0	0	0	0	0	0	0
Otu01031	Bacteria(100)	Proteobacteria(100)	Betaproteobacteria(100)	Neisseriales(100)	Neisseriaceae(100)	Neisseria(100)	0	0	0	0	0	0	0	0	0	0	0	0	0	2	4	0	0	0	0	0	0	0	0	0	0	0	0	0	0	0	0	0	0	0	0	0	0	0	0	0	9	0	0
Otu01032	Bacteria(100)	Proteobacteria(100)	Proteobacteria_unclassified(100)	Proteobacteria_unclassified(100)	Proteobacteria_unclassified(100)	Proteobacteria_unclassified(100)	0	0	0	0	0	0	0	0	0	0	0	0	0	0	0	0	0	0	0	0	0	0	0	0	0	0	0	0	0	0	0	0	0	0	0	0	0	237	1	0	17	0	71
Otu01033	Bacteria(100)	Firmicutes(100)	Bacilli(100)	Lactobacillales(100)	Streptococcaceae(100)	Streptococcus(100)	0	0	0	0	0	0	0	0	0	0	0	0	0	0	0	0	0	0	0	0	0	0	0	0	0	0	0	0	0	0	0	0	0	0	0	0	0	0	0	0	0	0	0
Otu01034	Bacteria(100)	Bacteroidetes(100)	Bacteroidia(100)	Bacteroidales(100)	Prevotellaceae(100)	Prevotella(100)	0	0	0	0	0	0	0	0	0	0	0	0	0	0	0	0	0	0	0	3	0	0	0	0	0	0	0	0	0	0	0	0	0	0	0	0	0	0	0	0	0	0	0
Otu01035	Bacteria(100)	Proteobacteria(100)	Alphaproteobacteria(100)	Rhodospirillales(100)	Rhodospirillales_unclassified(94)	Rhodospirillales_unclassified(94)	3	5	7	0	0	0	0	0	0	0	0	0	0	1	0	1	0	0	0	0	0	0	0	0	0	0	0	0	0	0	0	0	0	0	0	0	0	0	20	0	9	0	0
Otu01036	Bacteria(100)	Actinobacteria(100)	Actinobacteria(100)	Actinomycetales(100)	Nakamurellaceae(100)	Nakamurellaceae_unclassified(100)	0	0	0	0	0	0	0	0	0	0	0	0	0	0	0	0	0	0	0	2	0	0	0	0	2	0	0	0	0	0	0	0	6	0	0	0	0	159	3	121	0	0	0
Otu01038	Bacteria(100)	Proteobacteria(100)	Alphaproteobacteria(100)	Alphaproteobacteria_unclassified(96)	Alphaproteobacteria_unclassified(96)	Alphaproteobacteria_unclassified(96)	0	0	0	0	0	0	0	0	0	0	0	0	0	0	0	0	0	0	0	0	4	2	7	0	0	0	0	0	0	0	0	0	0	0	0	0	0	4	48	0	41	0	0
Otu01039	Bacteria(100)	Bacteroidetes(100)	Sphingobacteria(100)	Sphingobacteriales(100)	Sphingobacteriaceae(100)	Sphingobacterium(100)	0	0	0	0	0	0	0	0	0	0	0	0	0	0	0	0	0	0	0	0	0	0	0	0	0	0	0	0	0	0	0	0	0	0	0	0	0	0	0	0	0	0	0
Otu01040	Bacteria(100)	Bacteria_unclassified(100)	Bacteria_unclassified(100)	Bacteria_unclassified(100)	Bacteria_unclassified(100)	Bacteria_unclassified(100)	0	0	0	0	0	0	0	0	0	0	0	0	0	0	0	0	0	6	0	0	0	0	0	5	0	0	0	0	0	0	0	0	0	0	0	0	0	0	0	0	0	0	0
Otu01025	Bacteria(100)	Actinobacteria(100)	Actinobacteria(100)	Solirubrobacterales(100)	Conexibacteraceae(100)	Conexibacter(100)	0	1	0	0	0	74	0	0	0	0	0	0	0	0	0	1	3	0	0	0	0	1	0	0	0	0	0	0	0	0	0	0	0	0	0	0	0	0	11	0	3	0	37
Otu01037	Bacteria(100)	Proteobacteria(100)	Gammaproteobacteria(100)	Xanthomonadales(100)	Xanthomonadaceae(100)	Stenotrophomonas(100)	0	0	0	0	0	0	0	0	0	0	0	0	0	0	0	0	0	0	0	0	0	0	0	0	0	0	0	0	0	0	0	0	0	0	0	0	0	0	0	0	0	0	0
Otu01041	Bacteria(100)	Firmicutes(100)	Clostridia(100)	Clostridiales(100)	Clostridiaceae_1(92)	Clostridiaceae_1_unclassified(92)	0	0	0	0	0	0	0	0	0	0	0	0	0	0	0	2	0	0	0	0	0	0	0	0	0	0	0	0	0	0	0	0	0	0	0	0	0	0	0	0	0	0	0
Otu01042	Bacteria(100)	Proteobacteria(100)	Alphaproteobacteria(100)	Rhodospirillales(100)	Acetobacteraceae(100)	Acetobacteraceae_unclassified(100)	0	2	0	0	0	0	0	0	0	0	0	1	0	3	0	1	0	0	0	0	1	4	0	0	2	0	0	0	0	0	0	0	0	0	0	0	0	0	14	0	0	0	0
Otu01043	Bacteria(100)	Firmicutes(100)	Clostridia(100)	Clostridiales(100)	Lachnospiraceae(100)	Lachnospiraceae_unclassified(100)	0	0	0	0	0	0	0	0	0	0	0	0	0	0	0	0	0	0	0	0	0	0	0	0	0	0	0	0	0	0	0	0	0	0	0	0	0	0	0	0	0	0	0
Otu01044	Bacteria(100)	Bacteria_unclassified(100)	Bacteria_unclassified(100)	Bacteria_unclassified(100)	Bacteria_unclassified(100)	Bacteria_unclassified(100)	0	0	0	0	0	0	0	0	0	0	0	0	0	0	0	0	0	0	0	1	0	0	0	0	0	0	0	0	0	0	0	0	0	0	0	0	0	0	0	0	0	0	0
Otu01045	Bacteria(100)	Actinobacteria(100)	Actinobacteria(100)	Actinobacteria_unclassified(100)	Actinobacteria_unclassified(100)	Actinobacteria_unclassified(100)	0	0	0	0	0	0	0	0	0	0	0	0	0	0	0	0	0	0	0	0	0	0	0	0	0	0	0	0	0	0	0	0	0	0	0	0	0	0	0	0	0	0	0
Otu01029	Bacteria(100)	Bacteroidetes(100)	Flavobacteria(100)	Flavobacteriales(100)	Flavobacteriaceae(100)	Chryseobacterium(100)	1	26	0	0	0	0	0	3	0	0	1	0	3	0	0	0	0	0	0	0	0	0	0	0	0	0	0	0	0	0	0	0	0	0	0	0	47	0	0	0	0	0	0
Otu01047	Bacteria(100)	Planctomycetes(100)	Planctomycetacia(100)	Planctomycetales(100)	Planctomycetaceae(100)	Singulisphaera(100)	0	0	0	0	0	0	0	0	0	0	0	0	0	0	2	0	0	0	0	0	0	0	0	1	0	0	0	0	0	0	0	0	0	0	0	0	0	13	89	0	0	0	0
Otu01049	Bacteria(100)	Planctomycetes(100)	Planctomycetacia(100)	Planctomycetales(100)	Planctomycetaceae(100)	Planctomycetaceae_unclassified(100)	0	0	0	0	0	0	0	0	0	0	0	0	0	0	0	0	0	0	0	0	0	0	0	0	0	0	0	0	0	0	0	0	0	0	0	0	0	0	0	0	0	0	0
Otu01050	Bacteria(100)	Proteobacteria(100)	Deltaproteobacteria(100)	Bdellovibrionales(100)	Bacteriovoracaceae(100)	Peredibacter(100)	0	0	0	0	0	0	0	0	0	0	0	0	0	0	0	0	0	0	0	0	0	0	0	0	0	0	0	0	0	0	0	0	0	0	0	0	0	0	0	0	0	0	0
Otu01051	Bacteria(100)	Acidobacteria(100)	Acidobacteria_Gp1(100)	Acidobacteria_Gp1_order_incertae_sedis(100)	Acidobacteria_Gp1_family_incertae_sedis(100)	Gp1(100)	0	0	0	0	0	0	0	0	0	0	0	0	0	0	0	0	0	0	0	0	0	0	0	0	0	0	0	0	0	0	0	0	0	0	0	0	0	87	0	0	2	0	102
Otu01046	Bacteria(100)	Bacteroidetes(100)	Flavobacteria(100)	Flavobacteriales(100)	Flavobacteriaceae(100)	Wautersiella(100)	0	0	0	0	0	0	0	0	0	0	0	0	0	0	0	0	0	0	0	0	0	0	0	0	0	0	0	0	0	0	0	0	0	0	0	0	0	0	0	0	0	0	0
Otu01052	Bacteria(100)	Bacteria_unclassified(100)	Bacteria_unclassified(100)	Bacteria_unclassified(100)	Bacteria_unclassified(100)	Bacteria_unclassified(100)	0	0	0	0	0	0	0	0	0	0	0	0	0	0	0	0	0	0	0	0	0	0	0	0	0	0	0	0	0	0	0	0	0	0	0	0	0	0	0	0	0	0	0
Otu01053	Bacteria(100)	Bacteria_unclassified(100)	Bacteria_unclassified(100)	Bacteria_unclassified(100)	Bacteria_unclassified(100)	Bacteria_unclassified(100)	0	0	0	0	0	0	0	0	0	0	0	0	0	0	0	0	0	0	0	0	0	1	0	0	0	0	0	0	0	0	0	0	0	0	0	0	0	0	28	0	0	0	50
Otu01055	Bacteria(100)	Acidobacteria(100)	Acidobacteria_Gp4(100)	Acidobacteria_Gp4_order_incertae_sedis(100)	Acidobacteria_Gp4_family_incertae_sedis(100)	Gp4(100)	0	0	0	0	0	0	0	0	0	0	0	0	0	3	0	0	0	0	0	0	0	0	0	0	0	0	0	0	0	0	0	0	0	0	0	0	0	0	0	0	0	0	0
Otu00921	Bacteria(100)	Proteobacteria(100)	Alphaproteobacteria(100)	Sphingomonadales(100)	Sphingomonadaceae(100)	Sphingomonas(100)	1	53	0	0	0	0	0	0	0	0	0	0	0	3	0	0	0	0	0	0	0	0	0	0	0	0	0	0	0	0	0	0	0	0	0	0	0	0	0	0	1	0	0
Otu01056	Bacteria(100)	Bacteria_unclassified(100)	Bacteria_unclassified(100)	Bacteria_unclassified(100)	Bacteria_unclassified(100)	Bacteria_unclassified(100)	0	0	0	0	0	0	0	0	0	0	0	0	0	0	0	0	0	0	0	0	0	0	0	0	0	0	0	0	0	0	0	0	0	0	0	0	0	0	0	0	0	0	0
Otu01057	Bacteria(100)	Firmicutes(100)	Bacilli(100)	Bacillales(100)	Paenibacillaceae_1(100)	Cohnella(100)	0	4	0	0	0	0	0	0	0	0	0	0	0	0	0	0	1	0	0	0	0	1	0	0	0	0	0	0	0	0	0	0	0	0	0	0	0	0	2	0	4	0	4
Otu01058	Bacteria(100)	Firmicutes(100)	Clostridia(100)	Clostridiales(100)	Lachnospiraceae(100)	Clostridium_XlVb(100)	0	0	0	0	0	0	0	0	0	0	0	0	0	0	0	0	0	0	0	0	0	0	0	0	0	0	0	0	0	0	0	0	0	0	0	0	0	97	137	0	15	0	32
Otu01059	Bacteria(100)	Firmicutes(100)	Erysipelotrichia(100)	Erysipelotrichales(100)	Erysipelotrichaceae(100)	Clostridium_XVIII(99)	0	0	0	0	0	0	0	0	0	0	0	0	0	1	72	0	0	2	0	0	0	0	0	0	0	0	0	0	0	1	0	0	0	0	0	0	0	0	0	0	0	0	0
Otu01060	Bacteria(100)	Actinobacteria(100)	Actinobacteria(100)	Actinobacteria_unclassified(83)	Actinobacteria_unclassified(83)	Actinobacteria_unclassified(83)	0	0	0	0	0	0	0	0	0	0	0	0	0	0	2	8	1	0	0	0	0	0	0	0	0	0	0	0	0	0	0	3	0	0	0	6	39	94	22	0	7	0	57
Otu01061	Bacteria(100)	Proteobacteria(100)	Gammaproteobacteria(100)	Xanthomonadales(100)	Xanthomonadaceae(100)	Xanthomonadaceae_unclassified(100)	0	0	13	0	0	0	0	0	0	0	0	0	0	0	0	0	0	0	0	0	0	0	0	0	0	0	0	0	0	0	0	0	0	0	0	0	0	0	0	0	0	0	0
Otu00996	Bacteria(100)	Acidobacteria(100)	Acidobacteria_Gp3(100)	Acidobacteria_Gp3_order_incertae_sedis(100)	Acidobacteria_Gp3_family_incertae_sedis(100)	Gp3(100)	0	0	0	0	0	0	1	0	0	0	0	0	0	0	0	0	1	0	0	0	0	0	0	0	3	0	0	0	0	0	0	0	0	0	0	0	0	0	0	0	12	0	50
Otu01054	Bacteria(100)	Actinobacteria(100)	Actinobacteria(100)	Actinomycetales(100)	Actinomycetales_unclassified(100)	Actinomycetales_unclassified(100)	0	0	0	0	0	0	0	0	0	0	0	0	0	0	0	2	0	0	0	0	0	2	0	0	2	0	0	0	0	0	0	0	0	0	0	0	0	0	0	0	34	0	240
Otu01062	Bacteria(100)	Bacteroidetes(100)	Bacteroidia(100)	Bacteroidales(100)	Porphyromonadaceae(100)	Porphyromonadaceae_unclassified(100)	0	0	0	0	0	0	0	0	0	0	0	0	0	0	0	0	0	0	0	0	0	0	0	0	0	0	0	0	0	0	0	0	0	0	0	0	0	0	0	1	0	0	0
Otu01048	Bacteria(100)	Actinobacteria(100)	Actinobacteria(100)	Actinomycetales(100)	Nocardioidaceae(100)	Nocardioides(100)	0	1	0	0	0	10	1	48	5	0	0	0	0	1	0	0	0	9	0	0	1	0	0	0	0	1	0	0	0	0	0	10	0	0	0	0	0	6	0	0	0	0	0
Otu01063	Bacteria(100)	Bacteria_unclassified(100)	Bacteria_unclassified(100)	Bacteria_unclassified(100)	Bacteria_unclassified(100)	Bacteria_unclassified(100)	0	0	0	0	0	0	0	0	0	0	0	0	0	0	0	2	3	0	0	0	0	0	0	0	0	0	0	0	0	0	0	0	0	0	0	0	0	0	0	0	0	0	0
Otu01064	Bacteria(100)	Proteobacteria(100)	Alphaproteobacteria(100)	Alphaproteobacteria_unclassified(100)	Alphaproteobacteria_unclassified(100)	Alphaproteobacteria_unclassified(100)	0	8	0	0	0	0	0	0	0	0	0	0	0	0	0	0	0	0	0	0	0	0	0	0	0	0	0	0	0	0	0	0	0	0	0	0	0	25	0	0	5	0	0
Otu01065	Bacteria(100)	Planctomycetes(100)	Planctomycetacia(100)	Planctomycetales(100)	Planctomycetaceae(100)	Singulisphaera(63)	0	0	0	0	0	0	0	0	0	0	0	0	0	0	0	0	0	0	0	0	0	0	0	0	0	0	0	0	0	0	0	0	0	0	0	0	0	82	121	0	54	0	1
Otu01066	Bacteria(100)	Planctomycetes(100)	Planctomycetacia(100)	Planctomycetales(100)	Planctomycetaceae(100)	Planctomycetaceae_unclassified(100)	0	0	0	0	0	0	0	0	0	0	0	0	0	0	0	0	0	0	0	0	0	0	0	0	0	0	0	0	0	0	0	0	0	0	0	0	0	0	0	0	0	0	0
Otu01067	Bacteria(100)	Firmicutes(100)	Firmicutes_unclassified(100)	Firmicutes_unclassified(100)	Firmicutes_unclassified(100)	Firmicutes_unclassified(100)	0	0	0	0	0	0	0	0	0	0	0	0	0	0	0	0	0	0	0	0	0	0	0	0	0	0	0	0	0	0	0	0	0	0	0	0	0	0	0	0	0	0	0
Otu01068	Bacteria(100)	Planctomycetes(100)	Planctomycetacia(100)	Planctomycetales(100)	Planctomycetaceae(100)	Planctomycetaceae_unclassified(84)	0	0	0	0	0	0	0	0	0	0	0	0	0	0	0	0	0	0	0	0	0	0	0	0	0	0	0	0	0	0	0	0	0	0	0	0	0	0	145	0	6	0	127
Otu00947	Bacteria(100)	Verrucomicrobia(81)	Verrucomicrobia_unclassified(81)	Verrucomicrobia_unclassified(81)	Verrucomicrobia_unclassified(81)	Verrucomicrobia_unclassified(81)	0	0	0	0	0	0	0	0	0	0	0	0	0	0	0	0	0	0	0	0	0	0	0	0	0	0	0	0	0	0	0	0	0	0	0	0	0	3	25	0	1	0	239
Otu01069	Bacteria(100)	Firmicutes(100)	Bacilli(100)	Bacillales(100)	Bacillaceae_1(81)	Bacillus(81)	0	0	0	0	0	0	0	0	0	0	0	0	0	0	2	0	0	0	0	0	0	0	0	0	0	0	0	0	0	0	0	0	0	0	0	0	0	0	0	0	0	0	0
Otu01071	Bacteria(100)	Proteobacteria(66)	Proteobacteria_unclassified(66)	Proteobacteria_unclassified(66)	Proteobacteria_unclassified(66)	Proteobacteria_unclassified(66)	0	0	0	0	0	0	0	2	0	0	0	0	0	0	0	1	0	0	0	0	0	0	0	0	4	6	0	0	0	0	0	3	0	0	0	0	0	0	2	0	0	0	0
Otu01072	Bacteria(100)	Firmicutes(100)	Clostridia(100)	Clostridiales(100)	Lachnospiraceae(100)	Lachnospiraceae_unclassified(99)	0	0	0	0	0	0	0	0	0	0	0	0	0	0	306	0	0	0	0	0	0	0	0	0	0	0	0	0	0	0	0	0	0	0	0	0	0	0	0	0	0	0	0
Otu01074	Bacteria(100)	Chloroflexi(100)	Caldilineae(100)	Caldilineales(100)	Caldilineaceae(100)	Caldilinea(100)	0	0	0	0	0	0	0	0	0	0	0	0	0	0	0	0	0	0	0	0	0	0	0	0	0	0	0	0	0	0	0	0	0	0	0	0	0	0	0	0	0	0	0
Otu01075	Bacteria(100)	Actinobacteria(100)	Actinobacteria(100)	Acidimicrobiales(100)	Acidimicrobiales_unclassified(100)	Acidimicrobiales_unclassified(100)	0	0	0	0	0	0	0	0	0	0	0	0	0	0	0	0	0	0	0	0	0	0	0	0	0	0	0	0	0	0	0	0	0	0	0	0	0	0	0	0	15	0	0
Otu01076	Bacteria(100)	Bacteria_unclassified(100)	Bacteria_unclassified(100)	Bacteria_unclassified(100)	Bacteria_unclassified(100)	Bacteria_unclassified(100)	0	0	0	0	0	0	0	2	0	0	0	0	0	0	0	0	0	0	0	0	0	0	0	0	0	0	0	0	0	0	0	0	0	0	0	0	0	88	0	0	0	0	0
Otu01078	Bacteria(100)	Actinobacteria(100)	Actinobacteria(100)	Solirubrobacterales(100)	Solirubrobacterales_unclassified(100)	Solirubrobacterales_unclassified(100)	0	0	0	0	0	0	0	0	0	0	0	0	0	0	0	0	0	0	0	0	0	0	0	0	0	0	0	0	0	0	0	0	0	0	0	0	0	0	0	0	0	0	0
Otu01079	Bacteria(100)	Acidobacteria(100)	Acidobacteria_Gp6(100)	Acidobacteria_Gp6_order_incertae_sedis(100)	Acidobacteria_Gp6_family_incertae_sedis(100)	Gp6(100)	0	78	0	0	0	0	0	0	0	0	0	0	0	1	0	0	0	0	0	0	0	0	0	0	0	0	0	0	0	0	0	0	0	0	0	0	0	0	0	0	5	0	0
Otu01077	Bacteria(100)	Acidobacteria(100)	Acidobacteria_Gp1(100)	Acidobacteria_Gp1_order_incertae_sedis(100)	Acidobacteria_Gp1_family_incertae_sedis(100)	Gp1(100)	0	0	0	0	0	0	0	0	0	0	0	0	0	6	0	0	0	0	0	0	0	0	0	0	0	0	0	0	0	0	0	0	0	0	0	10	0	131	0	0	26	0	0
Otu01081	Bacteria(100)	Planctomycetes(100)	Planctomycetacia(100)	Planctomycetales(100)	Planctomycetaceae(100)	Planctomycetaceae_unclassified(100)	0	0	0	0	0	0	0	0	0	0	0	0	0	0	0	0	0	0	0	0	0	4	0	0	0	0	0	0	0	0	0	0	0	0	0	0	0	0	6	0	9	0	0
Otu01082	Bacteria(100)	Firmicutes(100)	Bacilli(100)	Lactobacillales(100)	Carnobacteriaceae(100)	Atopostipes(100)	0	0	0	0	0	0	0	0	0	0	0	0	0	0	0	0	0	0	2	0	0	0	0	0	0	0	6	0	0	0	0	0	0	0	0	0	0	0	0	0	0	0	0
Otu01084	Bacteria(100)	Bacteroidetes(100)	Sphingobacteria(100)	Sphingobacteriales(100)	Chitinophagaceae(100)	Chitinophagaceae_unclassified(90)	0	8	0	0	0	0	0	0	0	0	0	0	0	0	106	0	0	0	0	0	0	0	0	0	0	0	0	0	0	0	0	0	0	0	0	0	0	0	13	0	0	0	0
Otu01085	Bacteria(100)	Bacteria_unclassified(88)	Bacteria_unclassified(88)	Bacteria_unclassified(88)	Bacteria_unclassified(88)	Bacteria_unclassified(88)	0	4	0	0	0	0	0	0	0	0	0	0	0	0	0	0	0	0	0	0	0	0	0	0	0	0	0	0	0	0	0	0	0	0	0	0	0	69	0	0	50	0	0
Otu01086	Bacteria(100)	Firmicutes(100)	Bacilli(100)	Bacillales(100)	Bacillales_unclassified(100)	Bacillales_unclassified(100)	0	0	0	0	0	0	0	0	0	0	0	0	0	0	0	0	0	0	0	0	0	0	0	0	0	0	0	0	0	0	0	0	0	0	0	0	0	37	0	0	0	0	0
Otu01087	Bacteria(100)	Bacteroidetes(100)	Flavobacteria(100)	Flavobacteriales(100)	Flavobacteriaceae(100)	Flavobacterium(100)	0	0	0	0	0	0	0	0	0	0	0	0	0	0	0	0	0	0	0	0	0	0	0	0	0	0	0	0	0	0	0	0	0	0	0	0	0	0	0	0	0	0	0
Otu01091	Bacteria(100)	Proteobacteria(100)	Betaproteobacteria(100)	Betaproteobacteria_unclassified(100)	Betaproteobacteria_unclassified(100)	Betaproteobacteria_unclassified(100)	0	0	0	0	0	0	0	0	0	0	0	0	0	0	0	0	0	0	0	0	1	0	0	0	2	0	0	4	0	0	0	0	0	0	0	0	0	0	0	0	0	0	0
Otu01092	Bacteria(100)	Actinobacteria(100)	Actinobacteria(100)	Actinomycetales(100)	Corynebacteriaceae(100)	Turicella(100)	0	0	0	0	0	0	0	0	0	0	0	0	0	0	0	0	0	0	0	0	0	0	0	0	0	0	0	0	0	0	0	0	0	0	0	0	0	0	0	0	7	0	2
Otu01093	Bacteria(100)	Bacteria_unclassified(100)	Bacteria_unclassified(100)	Bacteria_unclassified(100)	Bacteria_unclassified(100)	Bacteria_unclassified(100)	0	0	0	0	0	0	0	0	297	0	0	0	0	0	0	0	0	0	0	0	0	0	0	0	0	0	0	0	0	0	0	0	0	0	0	0	0	0	0	0	0	0	0
Otu01094	Bacteria(100)	Proteobacteria(100)	Deltaproteobacteria(100)	Deltaproteobacteria_unclassified(100)	Deltaproteobacteria_unclassified(100)	Deltaproteobacteria_unclassified(100)	0	0	0	0	0	0	0	0	0	0	0	0	0	0	0	0	0	0	0	0	0	0	0	0	0	0	0	0	0	0	0	0	0	0	0	0	0	0	0	0	0	0	0
Otu01089	Bacteria(100)	Proteobacteria(100)	Alphaproteobacteria(100)	Rhodobacterales(99)	Rhodobacteraceae(99)	Rhodobacteraceae_unclassified(99)	0	0	0	0	0	0	0	0	0	0	0	0	0	0	0	0	0	0	0	0	0	0	0	0	0	0	0	0	0	0	0	0	0	0	0	0	0	0	0	0	0	0	0
Otu01095	Bacteria(100)	Firmicutes(100)	Clostridia(100)	Clostridiales(100)	Ruminococcaceae(100)	Ruminococcaceae_unclassified(100)	0	0	0	0	0	0	0	0	0	0	0	0	0	0	0	0	0	0	0	0	0	0	0	0	0	0	0	0	0	0	0	0	0	0	0	0	1	0	0	0	0	0	0
Otu01096	Bacteria(100)	Deinococcus-Thermus(100)	Deinococci(100)	Deinococcales(100)	Deinococcaceae(100)	Deinococcus(100)	0	0	0	0	0	0	0	0	0	0	0	0	0	0	0	0	0	0	0	0	0	0	0	0	0	0	0	0	0	0	0	0	0	0	0	0	0	0	0	0	0	0	0
Otu01097	Bacteria(100)	Firmicutes(100)	Bacilli(100)	Lactobacillales(100)	Leuconostocaceae(100)	Fructobacillus(100)	0	0	0	0	0	0	0	0	0	0	0	0	0	293	0	0	0	0	0	0	0	0	0	0	0	0	0	0	0	0	0	0	0	0	0	0	0	0	0	0	0	0	0
Otu01098	Bacteria(100)	Armatimonadetes(100)	Armatimonadia(100)	Armatimonadales(100)	Armatimonadaceae(100)	Armatimonas_Armatimonadetes_gp1(100)	0	0	0	0	0	0	0	0	0	0	0	0	0	0	0	0	0	0	0	0	0	0	0	0	0	0	0	0	0	0	0	0	0	0	0	0	0	0	0	0	0	0	0
Otu00981	Bacteria(100)	Proteobacteria(100)	Gammaproteobacteria(100)	Pseudomonadales(100)	Moraxellaceae(100)	Acinetobacter(100)	4	1	2	0	0	0	0	5	8	86	0	0	0	0	0	0	2	0	0	0	0	0	0	0	0	0	0	0	0	0	0	0	0	0	0	0	0	0	0	0	0	0	0
Otu01070	Bacteria(100)	Proteobacteria(100)	Alphaproteobacteria(100)	Rhizobiales(100)	Rhizobiales_unclassified(80)	Rhizobiales_unclassified(80)	0	8	0	0	0	0	0	0	0	0	0	0	0	0	0	0	0	0	0	0	0	0	0	0	0	0	0	0	0	0	0	0	0	0	0	0	0	6	3	0	6	0	191
Otu01090	Bacteria(100)	Actinobacteria(100)	Actinobacteria(100)	Solirubrobacterales(100)	Conexibacteraceae(100)	Conexibacter(100)	0	0	0	0	0	0	0	0	0	0	0	0	0	0	0	0	0	0	0	0	2	0	0	0	3	0	0	0	0	0	0	0	0	0	0	0	0	0	0	0	17	0	131
Otu01100	Bacteria(100)	Bacteria_unclassified(99)	Bacteria_unclassified(99)	Bacteria_unclassified(99)	Bacteria_unclassified(99)	Bacteria_unclassified(99)	0	0	0	0	0	0	0	0	0	0	0	0	0	0	0	0	0	0	0	0	0	0	0	0	0	0	0	0	0	0	0	0	0	0	0	0	0	0	0	0	0	0	0
Otu01101	Bacteria(100)	Planctomycetes(100)	Planctomycetacia(100)	Planctomycetales(100)	Planctomycetaceae(100)	Singulisphaera(100)	1	21	0	0	0	0	0	0	0	0	0	0	0	0	0	0	0	0	0	0	0	0	0	0	0	0	0	0	0	0	0	0	0	0	0	0	0	191	37	0	0	0	0
Otu01103	Bacteria(100)	Proteobacteria(100)	Alphaproteobacteria(100)	Rhodospirillales(100)	Acetobacteraceae(100)	Roseomonas(100)	0	0	0	0	0	0	0	0	0	0	0	0	0	0	0	0	0	0	0	0	0	0	0	0	0	0	0	0	0	0	0	0	0	0	0	0	0	0	43	0	0	89	3
Otu01104	Bacteria(100)	Proteobacteria(100)	Alphaproteobacteria(100)	Alphaproteobacteria_unclassified(100)	Alphaproteobacteria_unclassified(100)	Alphaproteobacteria_unclassified(100)	0	0	0	0	0	0	0	0	0	0	0	0	0	0	0	0	0	0	0	0	0	0	0	0	0	0	0	0	0	0	0	0	0	0	0	0	0	5	0	0	14	0	0
Otu01105	Bacteria(100)	Verrucomicrobia(100)	Verrucomicrobiae(100)	Verrucomicrobiales(100)	Verrucomicrobiaceae(100)	Prosthecobacter(100)	0	0	0	0	0	0	0	0	0	0	0	0	0	0	0	0	0	0	0	0	0	7	0	0	0	0	0	0	0	1	0	0	0	0	0	0	0	0	0	0	0	0	0
Otu01088	Bacteria(100)	Proteobacteria(100)	Alphaproteobacteria(100)	Rhizobiales(87)	Rhizobiales_unclassified(87)	Rhizobiales_unclassified(87)	0	0	0	0	0	0	0	9	0	0	4	0	0	0	0	0	7	0	0	0	0	0	0	0	0	0	24	0	0	0	0	0	0	0	0	2	0	0	0	0	0	0	71
Otu01106	Bacteria(100)	Firmicutes(100)	Clostridia(100)	Clostridiales(100)	Lachnospiraceae(100)	Clostridium_XlVa(88)	0	0	0	0	0	0	0	0	0	0	0	0	0	0	0	0	1	0	0	1	3	5	0	0	0	0	0	0	0	0	0	0	0	0	0	1	0	92	36	0	0	0	0
Otu01107	Bacteria(100)	Firmicutes(100)	Clostridia(100)	Clostridiales(100)	Clostridiales_unclassified(100)	Clostridiales_unclassified(100)	0	0	0	0	0	0	0	0	0	0	0	0	0	0	0	1	0	0	0	0	0	0	0	0	0	0	0	0	0	0	0	0	0	0	0	0	0	0	0	0	0	0	0
Otu01108	Bacteria(100)	Acidobacteria(100)	Acidobacteria_Gp2(100)	Acidobacteria_Gp2_order_incertae_sedis(100)	Acidobacteria_Gp2_family_incertae_sedis(100)	Gp2(100)	0	0	0	0	0	0	0	0	0	0	0	0	0	0	32	0	0	0	0	0	0	0	0	0	0	0	0	0	0	0	0	0	0	0	0	0	0	0	0	0	0	0	0
Otu01109	Bacteria(100)	Proteobacteria(100)	Alphaproteobacteria(100)	Rhizobiales(100)	Beijerinckiaceae(66)	Beijerinckia(61)	0	0	0	0	0	0	0	0	0	0	0	0	0	0	0	0	0	0	0	0	0	4	0	0	2	0	0	0	0	0	0	0	0	0	0	0	0	151	5	0	47	0	66
Otu01021	Bacteria(100)	Proteobacteria(100)	Alphaproteobacteria(100)	Rhizobiales(100)	Methylobacteriaceae(88)	Methylobacterium(88)	0	0	1	0	0	0	0	0	0	0	0	0	0	0	0	0	0	0	0	0	0	0	0	0	0	0	0	0	0	0	0	0	0	0	0	0	0	0	221	0	3	0	0
Otu01073	Bacteria(100)	Proteobacteria(100)	Alphaproteobacteria(100)	Rhodospirillales(100)	Acetobacteraceae(100)	Acetobacteraceae_unclassified(92)	0	23	0	0	0	0	13	0	0	0	0	0	0	0	0	0	0	0	0	0	0	0	0	0	5	0	0	0	0	0	0	0	0	0	0	0	0	79	27	0	32	0	8
Otu01111	Bacteria(100)	Planctomycetes(100)	Planctomycetacia(100)	Planctomycetales(100)	Planctomycetaceae(100)	Singulisphaera(100)	0	0	0	0	0	0	0	0	0	0	0	0	0	4	0	0	0	0	0	0	0	0	10	0	5	0	0	0	0	0	0	0	0	0	0	0	0	55	49	0	4	0	0
Otu01112	Bacteria(100)	Proteobacteria(100)	Alphaproteobacteria(100)	Rhizobiales(100)	Xanthobacteraceae(100)	Labrys(100)	0	0	0	0	0	0	0	0	0	0	0	0	0	0	0	0	2	0	0	0	0	4	8	0	3	0	0	0	0	0	0	0	0	0	0	0	0	67	139	0	0	0	32
Otu01110	Bacteria(100)	Bacteria_unclassified(100)	Bacteria_unclassified(100)	Bacteria_unclassified(100)	Bacteria_unclassified(100)	Bacteria_unclassified(100)	0	4	0	0	0	0	0	0	0	0	0	0	0	6	0	0	0	0	0	0	0	0	0	0	0	0	0	0	0	0	0	0	0	0	0	0	0	0	0	0	10	0	0
Otu01113	Bacteria(100)	Bacteroidetes(100)	Bacteroidia(100)	Bacteroidales(100)	Prevotellaceae(100)	Prevotella(100)	0	0	0	0	0	0	0	0	0	0	0	0	0	0	0	0	0	0	0	0	0	0	0	0	0	0	0	2	0	0	0	0	0	0	0	0	0	0	0	0	0	0	0
Otu01114	Bacteria(100)	Bacteria_unclassified(100)	Bacteria_unclassified(100)	Bacteria_unclassified(100)	Bacteria_unclassified(100)	Bacteria_unclassified(100)	0	0	6	0	0	0	0	0	0	0	0	0	0	0	0	0	0	0	0	0	0	0	0	0	0	0	0	0	0	0	0	0	0	0	0	0	0	152	0	0	16	0	0
Otu01116	Bacteria(100)	Proteobacteria(100)	Gammaproteobacteria(53)	Gammaproteobacteria_unclassified(53)	Gammaproteobacteria_unclassified(53)	Gammaproteobacteria_unclassified(53)	0	0	2	0	0	0	0	0	0	0	0	0	0	2	0	0	0	0	0	0	0	0	0	0	0	0	0	0	0	0	0	0	0	0	0	0	0	0	0	0	0	0	0
Otu01117	Bacteria(100)	Acidobacteria(100)	Acidobacteria_Gp6(100)	Acidobacteria_Gp6_order_incertae_sedis(100)	Acidobacteria_Gp6_family_incertae_sedis(100)	Gp6(100)	0	0	0	0	0	0	0	0	0	0	0	0	0	0	0	0	0	0	0	0	0	0	0	0	0	0	0	0	0	0	0	0	0	0	0	0	0	0	0	0	0	0	0
Otu01118	Bacteria(100)	Bacteria_unclassified(100)	Bacteria_unclassified(100)	Bacteria_unclassified(100)	Bacteria_unclassified(100)	Bacteria_unclassified(100)	0	0	0	0	0	0	0	0	0	0	0	0	0	0	0	0	0	0	0	0	0	0	0	0	0	0	0	0	0	0	0	0	0	0	0	0	0	0	0	0	0	0	0
Otu01119	Bacteria(100)	Planctomycetes(100)	Planctomycetacia(100)	Planctomycetales(100)	Planctomycetaceae(100)	Planctomycetaceae_unclassified(100)	0	0	0	0	0	0	0	0	0	0	0	0	0	22	0	0	0	0	0	0	0	0	0	0	1	0	0	0	0	0	0	0	0	0	0	4	0	1	0	0	0	0	0
Otu01120	Bacteria(100)	Bacteria_unclassified(99)	Bacteria_unclassified(99)	Bacteria_unclassified(99)	Bacteria_unclassified(99)	Bacteria_unclassified(99)	0	0	0	0	0	0	0	0	0	0	0	0	0	0	0	0	0	0	0	0	1	0	0	0	0	0	0	0	0	0	0	0	0	0	0	0	0	4	0	0	0	0	0
Otu01121	Bacteria(100)	Acidobacteria(100)	Acidobacteria_Gp3(100)	Acidobacteria_Gp3_order_incertae_sedis(84)	Acidobacteria_Gp3_family_incertae_sedis(84)	Gp3(84)	0	0	0	0	0	0	0	0	0	0	0	0	0	2	0	0	0	0	0	0	0	0	0	0	3	0	0	0	0	0	0	0	0	0	0	0	0	0	0	0	8	0	0
Otu01122	Bacteria(100)	Actinobacteria(100)	Actinobacteria(100)	Solirubrobacterales(99)	Solirubrobacterales_unclassified(54)	Solirubrobacterales_unclassified(54)	0	10	0	0	0	32	0	0	0	0	0	0	0	0	0	3	0	0	0	0	0	1	0	0	0	0	0	0	0	0	0	3	0	0	0	0	0	9	42	0	59	0	31
Otu01123	Bacteria(100)	Proteobacteria(100)	Alphaproteobacteria(100)	Rhodospirillales(100)	Acetobacteraceae(100)	Acetobacteraceae_unclassified(97)	0	0	0	0	0	0	0	0	0	0	0	0	0	0	0	0	0	0	0	0	0	0	0	0	0	0	0	0	0	0	0	0	0	0	0	0	0	0	0	0	0	0	0
Otu01124	Bacteria(100)	Firmicutes(100)	Clostridia(100)	Clostridiales(100)	Clostridiales_unclassified(100)	Clostridiales_unclassified(100)	0	0	0	0	0	0	0	0	0	0	0	0	0	0	0	0	0	0	0	0	0	0	0	0	0	0	0	0	0	0	0	0	0	0	0	0	0	0	0	0	0	0	0
Otu01126	Bacteria(100)	Bacteria_unclassified(100)	Bacteria_unclassified(100)	Bacteria_unclassified(100)	Bacteria_unclassified(100)	Bacteria_unclassified(100)	0	0	0	0	0	0	0	0	0	0	0	0	0	0	0	0	0	0	0	0	0	0	0	0	0	0	0	0	0	0	0	0	0	0	0	0	0	0	0	0	0	0	0
Otu01127	Bacteria(100)	Proteobacteria(100)	Betaproteobacteria(100)	Rhodocyclales(100)	Rhodocyclaceae(100)	Rhodocyclaceae_unclassified(100)	0	0	0	0	0	0	0	0	0	0	0	0	0	0	0	0	0	0	0	0	0	0	0	0	0	0	0	0	0	0	0	0	0	0	0	0	0	0	0	0	2	0	0
Otu01128	Bacteria(100)	Actinobacteria(100)	Actinobacteria(100)	Actinomycetales(100)	Actinomycetales_unclassified(100)	Actinomycetales_unclassified(100)	1	0	0	0	0	0	0	0	0	0	0	0	0	0	0	2	0	0	0	0	0	0	0	0	0	0	0	0	0	0	0	0	0	0	0	0	0	0	0	0	0	0	0
Otu01125	Bacteria(100)	Proteobacteria(100)	Gammaproteobacteria(100)	Pseudomonadales(100)	Pseudomonadaceae(100)	Pseudomonas(100)	0	6	0	0	0	63	0	0	0	0	0	0	0	0	0	0	0	0	0	0	0	0	0	0	0	0	0	0	0	0	0	0	0	0	0	0	0	1	0	0	0	0	0
Otu01129	Bacteria(100)	Firmicutes(100)	Clostridia(100)	Clostridiales(100)	Clostridiaceae_1(100)	Clostridium_sensu_stricto(100)	0	0	0	0	0	0	0	0	0	0	0	0	0	0	0	0	0	0	0	0	0	0	0	3	0	0	0	0	0	0	0	0	0	0	0	0	0	1	0	0	0	0	0
Otu01131	Bacteria(100)	Planctomycetes(100)	Planctomycetacia(100)	Planctomycetales(100)	Planctomycetaceae(100)	Planctomycetaceae_unclassified(100)	5	0	0	0	0	0	0	0	0	0	0	0	0	0	0	0	0	0	0	0	0	0	0	0	0	0	0	0	0	0	0	0	0	0	0	0	0	0	0	0	0	0	0
Otu01132	Bacteria(100)	Firmicutes(100)	Erysipelotrichia(100)	Erysipelotrichales(100)	Erysipelotrichaceae(100)	Erysipelotrichaceae_incertae_sedis(100)	0	0	0	0	0	0	0	0	0	0	0	0	0	0	43	0	0	0	0	0	0	0	0	0	0	0	0	0	0	0	0	0	0	0	0	0	0	0	0	0	0	0	0
Otu01133	Bacteria(100)	Proteobacteria(100)	Gammaproteobacteria(100)	Xanthomonadales(100)	Xanthomonadaceae(100)	Xanthomonadaceae_unclassified(67)	0	0	0	0	0	0	0	0	0	0	0	0	0	0	0	0	1	0	0	0	0	0	0	0	0	0	4	0	0	0	0	0	0	0	0	0	0	0	0	0	0	0	0
Otu01134	Bacteria(100)	Firmicutes(100)	Clostridia(100)	Clostridiales(100)	Lachnospiraceae(100)	Lachnospiraceae_unclassified(100)	0	0	0	0	0	0	0	0	0	0	0	0	0	0	0	0	0	0	0	0	0	1	0	0	0	0	0	0	0	0	0	0	0	0	0	0	0	271	0	0	0	0	0
Otu01136	Bacteria(100)	Proteobacteria(100)	Alphaproteobacteria(100)	Rhizobiales(100)	Rhizobiales_unclassified(100)	Rhizobiales_unclassified(100)	0	0	5	0	0	0	0	0	0	0	0	0	58	0	0	0	0	0	0	0	0	0	0	0	0	0	0	0	0	0	0	0	0	0	0	0	0	128	42	0	39	0	0
Otu01137	Bacteria(100)	Firmicutes(100)	Clostridia(100)	Clostridiales(100)	Lachnospiraceae(100)	Blautia(100)	0	0	0	0	0	0	0	0	0	0	0	0	0	63	4	0	0	1	0	0	0	0	0	0	0	0	168	3	0	0	0	0	0	0	0	0	0	0	0	0	0	0	0
Otu01138	Bacteria(100)	Proteobacteria(100)	Gammaproteobacteria(100)	Gammaproteobacteria_unclassified(100)	Gammaproteobacteria_unclassified(100)	Gammaproteobacteria_unclassified(100)	0	0	0	0	0	0	0	0	0	0	0	0	0	0	0	0	0	0	0	0	0	0	0	0	0	0	0	0	0	0	0	0	0	0	0	0	0	0	0	0	0	0	0
Otu01139	Bacteria(100)	OD1(100)	OD1_class_incertae_sedis(100)	OD1_order_incertae_sedis(100)	OD1_family_incertae_sedis(100)	OD1_genus_incertae_sedis(100)	0	0	0	0	0	0	0	0	0	0	0	0	0	0	0	0	0	0	0	0	0	0	0	0	0	0	0	0	0	0	0	0	0	0	0	0	0	0	0	0	0	278	0
Otu01135	Bacteria(100)	Verrucomicrobia(99)	Spartobacteria(71)	Spartobacteria_order_incertae_sedis(71)	Spartobacteria_family_incertae_sedis(71)	Spartobacteria_genera_incertae_sedis(61)	0	0	0	1	0	0	2	0	0	0	0	0	0	0	0	0	0	0	0	0	0	0	0	0	0	0	0	0	0	0	0	0	0	0	0	0	0	140	0	0	17	0	23
Otu01140	Bacteria(100)	Planctomycetes(100)	Planctomycetacia(100)	Planctomycetales(100)	Planctomycetaceae(100)	Gemmata(70)	0	24	0	0	0	0	0	0	0	0	0	0	0	0	0	4	0	2	0	0	0	1	0	0	0	0	0	0	0	0	0	0	0	0	0	0	0	0	8	0	26	0	0
Otu01141	Bacteria(100)	Planctomycetes(91)	Planctomycetacia(91)	Planctomycetales(91)	Planctomycetaceae(91)	Planctomycetaceae_unclassified(91)	0	3	0	0	0	0	0	0	0	0	0	0	0	10	0	0	0	0	0	0	0	1	5	0	16	0	0	0	0	0	0	0	0	0	0	0	0	0	0	0	10	0	0
Otu01143	Bacteria(100)	Proteobacteria(100)	Alphaproteobacteria(100)	Rhizobiales(100)	Rhizobiales_unclassified(100)	Rhizobiales_unclassified(100)	0	0	0	0	0	0	7	0	0	0	0	0	0	0	0	0	0	0	0	0	0	0	1	0	0	0	0	0	0	0	0	0	0	0	0	0	0	48	0	0	39	0	14
Otu01144	Bacteria(100)	Planctomycetes(100)	Planctomycetacia(100)	Planctomycetales(100)	Planctomycetaceae(100)	Singulisphaera(92)	0	0	0	0	0	0	0	0	0	0	0	0	0	0	0	0	0	0	0	12	0	3	0	0	0	0	0	0	0	0	0	0	0	0	0	0	0	1	72	0	36	0	0
Otu01145	Bacteria(100)	OP11(100)	OP11_class_incertae_sedis(100)	OP11_order_incertae_sedis(100)	OP11_family_incertae_sedis(100)	OP11_genus_incertae_sedis(100)	0	0	0	0	0	0	0	0	0	0	0	0	0	0	0	0	0	0	0	0	0	0	0	0	0	0	0	0	0	0	0	0	0	0	0	0	0	0	0	0	0	0	0
Otu01146	Bacteria(100)	Bacteria_unclassified(100)	Bacteria_unclassified(100)	Bacteria_unclassified(100)	Bacteria_unclassified(100)	Bacteria_unclassified(100)	0	0	0	0	0	0	0	0	0	0	0	0	0	0	272	0	0	0	1	0	0	0	0	0	0	0	0	0	0	0	0	0	0	0	0	0	0	0	0	0	0	0	0
Otu01147	Bacteria(100)	Bacteria_unclassified(100)	Bacteria_unclassified(100)	Bacteria_unclassified(100)	Bacteria_unclassified(100)	Bacteria_unclassified(100)	0	0	0	0	0	0	0	0	0	0	0	0	0	0	0	0	0	0	0	0	0	0	0	0	0	0	0	0	0	0	0	0	0	0	0	0	0	0	0	0	0	0	0
Otu01148	Bacteria(100)	Proteobacteria(100)	Alphaproteobacteria(100)	Rhizobiales(94)	Phyllobacteriaceae(91)	Phyllobacteriaceae_unclassified(91)	0	0	0	0	0	0	0	0	0	0	0	0	0	0	0	0	0	0	0	0	0	0	0	0	0	0	0	0	0	0	0	4	5	0	0	0	0	54	4	0	88	0	0
Otu01149	Bacteria(100)	Firmicutes(100)	Clostridia(100)	Clostridiales(100)	Ruminococcaceae(100)	Faecalibacterium(100)	0	0	0	0	0	0	0	0	0	0	0	0	0	0	0	1	0	0	0	0	0	0	0	0	0	0	0	0	0	0	0	0	0	0	0	0	0	0	0	0	0	0	0
Otu01150	Bacteria(100)	Bacteroidetes(100)	Bacteroidetes_unclassified(100)	Bacteroidetes_unclassified(100)	Bacteroidetes_unclassified(100)	Bacteroidetes_unclassified(100)	0	0	0	0	0	0	0	0	0	0	0	0	0	0	59	0	0	0	0	0	0	0	0	0	0	0	0	0	0	1	0	0	0	0	0	0	0	0	0	0	0	0	0
Otu01142	Bacteria(100)	Planctomycetes(100)	Planctomycetacia(100)	Planctomycetales(100)	Planctomycetaceae(100)	Planctomycetaceae_unclassified(51)	0	0	0	0	0	0	0	0	0	0	0	0	0	0	0	0	0	0	0	1	1	22	7	0	59	0	0	0	0	0	0	0	0	0	0	0	0	76	14	0	0	0	0
Otu01152	Bacteria(100)	Actinobacteria(100)	Actinobacteria(100)	Solirubrobacterales(100)	Conexibacteraceae(100)	Conexibacter(100)	0	0	0	0	0	0	0	0	0	0	0	0	0	0	0	2	0	0	0	0	0	0	0	0	0	0	0	0	0	0	0	0	0	0	0	0	0	0	0	0	0	0	36
Otu01153	Bacteria(100)	Bacteria_unclassified(100)	Bacteria_unclassified(100)	Bacteria_unclassified(100)	Bacteria_unclassified(100)	Bacteria_unclassified(100)	0	0	0	0	0	0	0	0	0	0	0	0	0	0	0	0	0	0	0	0	0	0	0	0	0	0	0	0	0	0	0	0	0	0	0	0	0	0	0	0	0	0	0
Otu01130	Bacteria(100)	Firmicutes(100)	Bacilli(100)	Bacillales(100)	Paenibacillaceae_1(100)	Paenibacillaceae_1_unclassified(100)	0	0	0	1	0	0	0	0	251	0	0	0	0	0	0	0	0	0	0	0	0	0	0	0	0	0	0	0	0	0	0	0	0	0	0	0	0	0	0	0	0	0	0
Otu01154	Bacteria(100)	Firmicutes(100)	Clostridia(100)	Clostridiales(100)	Peptococcaceae_1(100)	Desulfosporosinus(100)	0	0	0	0	0	0	0	0	0	0	0	0	0	0	0	0	0	0	0	0	0	0	0	0	0	0	0	0	0	0	0	0	0	0	0	0	0	0	0	0	0	0	0
Otu01155	Bacteria(100)	Bacteria_unclassified(100)	Bacteria_unclassified(100)	Bacteria_unclassified(100)	Bacteria_unclassified(100)	Bacteria_unclassified(100)	0	0	0	0	0	0	0	0	0	0	0	0	0	0	0	0	0	0	0	0	0	0	0	0	0	0	0	0	0	0	0	0	0	0	0	0	0	0	0	0	0	0	0
Otu01157	Bacteria(100)	Actinobacteria(100)	Actinobacteria(100)	Acidimicrobiales(100)	Acidimicrobiales_unclassified(100)	Acidimicrobiales_unclassified(100)	0	0	0	0	0	0	0	0	0	0	0	0	0	0	0	6	0	0	0	0	0	0	0	0	3	0	0	0	0	0	0	0	0	0	0	0	0	0	60	0	9	0	49
Otu01158	Bacteria(100)	Proteobacteria(100)	Gammaproteobacteria(64)	Gammaproteobacteria_unclassified(64)	Gammaproteobacteria_unclassified(64)	Gammaproteobacteria_unclassified(64)	0	0	0	0	0	0	0	0	0	0	0	0	0	0	0	0	0	0	0	0	0	0	0	0	0	0	0	0	0	0	0	0	0	0	0	0	0	4	0	0	0	0	0
Otu01159	Bacteria(100)	Bacteria_unclassified(100)	Bacteria_unclassified(100)	Bacteria_unclassified(100)	Bacteria_unclassified(100)	Bacteria_unclassified(100)	0	0	0	0	0	0	0	0	0	0	0	0	0	0	0	0	0	0	0	0	0	0	0	0	0	0	0	0	0	0	0	0	0	0	0	0	0	0	0	0	0	0	0
Otu01160	Bacteria(100)	Bacteria_unclassified(100)	Bacteria_unclassified(100)	Bacteria_unclassified(100)	Bacteria_unclassified(100)	Bacteria_unclassified(100)	0	0	0	0	0	0	0	0	0	0	0	0	0	0	0	0	0	0	0	0	0	0	0	0	0	0	0	0	0	0	0	0	0	0	0	0	0	0	0	0	0	0	0
Otu01162	Bacteria(100)	Planctomycetes(100)	Planctomycetacia(100)	Planctomycetales(100)	Planctomycetaceae(100)	Singulisphaera(100)	0	0	0	0	0	0	0	0	0	0	0	0	0	0	0	0	0	0	0	0	0	0	0	0	0	0	0	0	0	0	0	0	0	0	0	1	0	41	218	0	2	0	0
Otu01163	Bacteria(100)	Planctomycetes(100)	Planctomycetacia(100)	Planctomycetales(100)	Planctomycetaceae(100)	Singulisphaera(100)	0	0	0	0	0	0	0	0	0	0	0	0	0	0	0	0	0	0	0	0	0	0	0	0	0	0	0	0	0	0	0	0	0	0	0	0	0	36	96	18	13	0	0
Otu01165	Bacteria(100)	Bacteroidetes(100)	Flavobacteria(100)	Flavobacteriales(100)	Flavobacteriaceae(100)	Flavobacterium(100)	0	0	0	0	0	0	0	0	0	0	0	0	0	0	0	0	0	0	0	0	0	0	0	0	0	0	0	0	0	0	0	0	0	0	0	0	0	0	0	0	0	0	0
Otu01166	Bacteria(100)	Bacteroidetes(100)	Bacteroidetes_unclassified(69)	Bacteroidetes_unclassified(69)	Bacteroidetes_unclassified(69)	Bacteroidetes_unclassified(69)	0	0	0	0	0	0	0	0	0	0	0	0	0	0	0	0	0	0	0	0	0	0	0	0	0	0	0	0	0	0	0	0	0	0	0	0	0	0	0	0	0	0	0
Otu01167	Bacteria(100)	Proteobacteria(100)	Deltaproteobacteria(100)	Deltaproteobacteria_unclassified(100)	Deltaproteobacteria_unclassified(100)	Deltaproteobacteria_unclassified(100)	0	0	0	0	0	0	0	0	0	0	0	0	0	0	0	0	0	0	0	0	0	0	0	0	0	0	0	0	0	0	0	0	0	0	0	0	0	0	0	0	0	265	0
Otu01169	Bacteria(100)	Planctomycetes(100)	Planctomycetacia(100)	Planctomycetales(100)	Planctomycetaceae(100)	Planctomycetaceae_unclassified(81)	0	0	0	0	0	0	0	0	0	0	0	0	0	0	0	0	0	0	0	16	23	54	12	0	11	0	0	0	0	0	0	2	0	0	0	0	0	0	0	0	0	0	0
Otu01170	Bacteria(100)	Proteobacteria(100)	Alphaproteobacteria(100)	Rhizobiales(100)	Hyphomicrobiaceae(100)	Hyphomicrobium(86)	0	0	0	0	0	0	0	0	0	0	0	0	0	0	0	0	0	0	0	4	0	0	1	0	0	0	0	0	0	0	0	0	0	0	0	0	0	0	0	0	0	0	0
Otu01171	Bacteria(100)	Bacteria_unclassified(100)	Bacteria_unclassified(100)	Bacteria_unclassified(100)	Bacteria_unclassified(100)	Bacteria_unclassified(100)	0	0	0	0	0	0	0	0	0	0	0	0	0	3	0	0	0	0	0	0	0	0	0	0	0	0	0	0	0	0	0	0	0	0	0	0	0	0	0	0	0	0	0
Otu01172	Bacteria(100)	Verrucomicrobia(100)	Subdivision3(100)	Subdivision3_order_incertae_sedis(100)	Subdivision3_family_incertae_sedis(100)	3_genus_incertae_sedis(100)	0	0	0	0	0	0	0	0	0	0	0	0	0	0	0	0	0	0	0	0	0	0	0	0	0	0	0	0	0	0	0	0	0	0	0	0	0	0	0	0	0	0	0
Otu01173	Bacteria(100)	Actinobacteria(100)	Actinobacteria(100)	Actinomycetales(100)	Brevibacteriaceae(100)	Brevibacterium(100)	0	1	0	0	0	0	0	0	0	0	0	0	0	0	0	0	0	0	0	0	0	0	0	0	0	0	0	0	0	0	0	0	0	0	0	0	0	0	0	0	0	0	0
Otu01175	Bacteria(100)	Firmicutes(100)	Clostridia(100)	Clostridiales(100)	Clostridiales_unclassified(100)	Clostridiales_unclassified(100)	0	0	0	0	0	0	0	0	0	0	0	0	0	0	0	0	0	0	0	0	0	0	0	0	0	0	0	0	0	0	0	0	0	0	0	0	0	1	259	0	2	0	0
Otu01177	Bacteria(100)	Proteobacteria(100)	Alphaproteobacteria(100)	Caulobacterales(100)	Caulobacteraceae(100)	Caulobacteraceae_unclassified(69)	0	0	0	0	0	0	0	0	0	0	0	0	0	2	0	0	0	0	0	0	0	0	0	0	1	0	0	0	0	0	0	0	0	0	0	7	0	33	0	0	25	0	0
Otu01178	Bacteria(100)	OD1(100)	OD1_class_incertae_sedis(100)	OD1_order_incertae_sedis(100)	OD1_family_incertae_sedis(100)	OD1_genus_incertae_sedis(100)	0	0	0	0	0	0	0	0	0	0	0	0	0	0	0	0	0	0	0	0	0	0	0	0	0	0	0	0	0	0	0	0	0	0	0	0	0	0	0	0	0	0	0
Otu01179	Bacteria(100)	Bacteria_unclassified(100)	Bacteria_unclassified(100)	Bacteria_unclassified(100)	Bacteria_unclassified(100)	Bacteria_unclassified(100)	0	0	0	0	0	0	0	0	0	0	0	0	0	0	0	0	0	0	0	0	0	0	0	0	0	0	0	0	0	0	0	0	0	0	0	0	0	1	0	0	7	0	0
Otu01180	Bacteria(100)	Actinobacteria(100)	Actinobacteria(100)	Actinomycetales(100)	Actinomycetales_unclassified(100)	Actinomycetales_unclassified(100)	0	0	0	0	0	0	0	0	0	0	0	0	0	0	0	0	0	0	0	0	0	0	0	0	0	0	0	0	0	0	0	0	0	0	0	0	0	0	0	0	0	0	0
Otu01182	Bacteria(100)	Actinobacteria(100)	Actinobacteria(100)	Actinomycetales(100)	Actinomycetales_unclassified(100)	Actinomycetales_unclassified(100)	0	0	0	0	0	0	0	0	0	0	0	0	0	0	0	0	0	0	0	0	0	0	0	0	0	0	0	0	0	0	0	0	0	0	0	0	0	0	0	0	0	0	0
Otu01183	Bacteria(100)	Planctomycetes(100)	Planctomycetacia(100)	Planctomycetales(100)	Planctomycetaceae(100)	Zavarzinella(72)	0	0	0	0	0	0	0	0	0	0	0	0	0	9	0	0	0	0	0	0	0	0	0	0	0	0	0	0	0	0	0	0	0	0	0	0	0	54	0	0	1	0	0
Otu01184	Bacteria(100)	Verrucomicrobia(100)	Spartobacteria(100)	Spartobacteria_order_incertae_sedis(100)	Spartobacteria_family_incertae_sedis(100)	Spartobacteria_genera_incertae_sedis(100)	0	0	0	0	0	0	0	0	0	0	0	0	0	24	2	0	0	0	0	0	0	0	0	0	0	0	17	0	0	0	0	0	0	0	0	0	0	0	0	0	0	0	0
Otu01185	Bacteria(100)	Verrucomicrobia(100)	Opitutae(100)	Opitutales(100)	Opitutaceae(100)	Opitutus(100)	0	0	0	0	0	0	0	0	0	0	0	0	0	0	0	0	0	0	0	0	0	0	0	0	0	0	0	0	0	0	0	0	0	0	0	0	0	0	2	0	4	0	0
Otu01099	Bacteria(100)	Actinobacteria(100)	Actinobacteria(100)	Actinomycetales(100)	Micrococcaceae(100)	Rothia(100)	0	0	3	0	0	0	0	0	0	0	0	0	0	0	0	0	1	0	0	0	0	0	0	0	0	0	0	0	0	0	0	0	0	0	0	0	0	0	0	0	0	0	0
Otu01181	Bacteria(100)	Planctomycetes(100)	Planctomycetacia(100)	Planctomycetales(100)	Planctomycetaceae(100)	Planctomycetaceae_unclassified(100)	0	0	0	0	0	0	0	0	0	0	0	0	0	0	0	0	0	0	0	0	0	0	0	0	0	0	0	0	0	0	0	0	0	0	0	0	0	33	69	0	0	0	0
Otu01187	Bacteria(100)	Proteobacteria(100)	Alphaproteobacteria(100)	Caulobacterales(100)	Caulobacteraceae(100)	Phenylobacterium(100)	0	0	0	0	0	0	0	0	0	0	0	0	0	0	0	0	0	0	0	0	0	7	0	0	1	0	0	0	0	0	0	0	0	0	0	0	0	0	0	0	23	0	13
Otu01188	Bacteria(100)	Bacteria_unclassified(100)	Bacteria_unclassified(100)	Bacteria_unclassified(100)	Bacteria_unclassified(100)	Bacteria_unclassified(100)	0	0	0	0	0	0	0	0	0	0	0	0	0	0	0	0	0	0	0	0	0	0	0	0	0	0	0	0	0	0	0	0	0	0	0	0	0	0	0	0	0	0	0
Otu01189	Bacteria(100)	Acidobacteria(100)	Acidobacteria_Gp4(100)	Acidobacteria_Gp4_order_incertae_sedis(100)	Acidobacteria_Gp4_family_incertae_sedis(100)	Gp4(100)	0	6	1	0	0	0	10	0	0	0	0	0	0	0	0	0	0	0	0	0	0	0	0	0	0	0	0	0	0	0	0	0	0	0	0	0	0	17	0	0	3	0	77
Otu01190	Bacteria(100)	Proteobacteria(100)	Alphaproteobacteria(100)	Sphingomonadales(100)	Sphingomonadaceae(100)	Sphingobium(100)	0	0	0	0	0	0	0	0	20	0	0	0	0	0	0	0	0	0	0	0	0	0	0	0	0	0	0	0	0	0	0	0	0	1	0	0	0	0	0	0	0	0	0
Otu01191	Bacteria(100)	Firmicutes(100)	Clostridia(100)	Clostridiales(100)	Lachnospiraceae(100)	Lachnospiraceae_unclassified(100)	0	0	0	0	0	0	0	0	0	0	0	0	0	3	0	0	0	0	5	0	0	0	0	0	0	0	0	0	0	0	0	0	0	0	0	0	0	0	0	0	0	0	0
Otu01194	Bacteria(100)	Actinobacteria(100)	Actinobacteria(100)	Acidimicrobiales(99)	Acidimicrobiales_unclassified(99)	Acidimicrobiales_unclassified(99)	0	0	0	0	0	0	0	0	0	0	0	0	0	0	0	3	1	0	0	8	17	20	13	0	4	0	0	0	0	0	0	1	0	0	0	0	52	0	0	0	0	0	31
Otu00826	Bacteria(100)	Firmicutes(100)	Bacilli(100)	Bacillales(100)	Bacillales_unclassified(100)	Bacillales_unclassified(100)	0	4	0	0	0	0	4	0	133	0	0	0	0	0	0	0	0	0	0	0	0	0	0	0	0	0	0	0	0	0	0	0	0	0	0	0	0	0	0	0	0	0	0
Otu01192	Bacteria(100)	Planctomycetes(100)	Planctomycetacia(100)	Planctomycetales(100)	Planctomycetaceae(100)	Singulisphaera(100)	0	0	0	0	0	0	0	0	0	0	0	0	0	0	0	1	0	0	0	3	10	21	0	0	0	0	0	0	0	0	0	0	0	0	0	0	0	4	69	0	39	0	0
Otu01195	Bacteria(100)	Bacteria_unclassified(100)	Bacteria_unclassified(100)	Bacteria_unclassified(100)	Bacteria_unclassified(100)	Bacteria_unclassified(100)	0	0	0	0	0	0	0	0	0	0	0	0	0	0	0	0	0	0	0	0	0	0	0	0	0	0	0	0	0	0	0	0	0	0	0	0	0	0	0	0	0	0	0
Otu01196	Bacteria(100)	Actinobacteria(100)	Actinobacteria(100)	Actinomycetales(100)	Sanguibacteraceae(100)	Sanguibacter(100)	0	0	0	0	0	0	0	0	0	0	0	0	0	0	0	0	0	4	0	0	0	2	0	0	0	0	0	0	0	0	0	3	0	0	0	9	13	5	30	0	5	0	0
Otu01197	Bacteria(100)	Actinobacteria(100)	Actinobacteria(100)	Actinomycetales(100)	Kineosporiaceae(100)	Kineococcus(100)	0	16	0	0	0	0	0	0	0	0	0	0	0	0	0	0	0	0	0	0	0	0	0	0	0	0	0	0	0	0	0	0	0	0	0	0	0	0	0	0	0	0	0
Otu01198	Bacteria(100)	Proteobacteria(100)	Alphaproteobacteria(100)	Alphaproteobacteria_unclassified(100)	Alphaproteobacteria_unclassified(100)	Alphaproteobacteria_unclassified(100)	0	0	0	0	0	0	0	0	0	0	0	0	0	0	0	0	0	0	0	0	0	0	0	0	0	0	0	0	0	0	0	0	0	0	0	0	0	0	0	0	0	0	0
Otu01200	Bacteria(100)	Bacteria_unclassified(100)	Bacteria_unclassified(100)	Bacteria_unclassified(100)	Bacteria_unclassified(100)	Bacteria_unclassified(100)	0	0	0	0	0	0	0	0	0	0	0	0	0	0	0	0	0	0	0	0	0	0	0	0	0	0	0	0	0	0	0	0	0	0	0	0	0	0	0	0	0	0	0
Otu01201	Bacteria(100)	Firmicutes(100)	Clostridia(82)	Clostridiales(82)	Clostridiales_unclassified(82)	Clostridiales_unclassified(82)	0	0	0	0	0	0	0	0	0	0	0	0	0	0	35	0	0	0	0	0	0	0	0	0	0	2	0	0	0	1	0	0	0	0	0	0	0	0	0	0	0	0	0
Otu01202	Bacteria(100)	Firmicutes(100)	Clostridia(100)	Clostridiales(100)	Lachnospiraceae(100)	Clostridium_XlVb(100)	0	0	0	0	0	0	0	0	0	0	0	0	0	0	0	1	0	0	0	0	0	4	0	0	0	0	0	0	0	0	0	0	0	0	0	0	0	143	21	0	0	0	0
Otu01203	Bacteria(100)	Actinobacteria(100)	Actinobacteria(100)	Actinomycetales(100)	Actinomycetales_unclassified(99)	Actinomycetales_unclassified(99)	0	0	0	0	0	0	0	0	0	0	0	0	0	0	0	0	0	0	0	0	0	0	0	0	0	0	0	0	0	0	0	0	0	0	0	0	0	0	0	0	0	0	0
Otu01199	Bacteria(100)	Actinobacteria(100)	Actinobacteria(100)	Actinomycetales(100)	Corynebacteriaceae(100)	Corynebacterium(100)	0	0	0	0	0	0	0	0	0	0	0	0	0	0	9	0	0	0	0	0	1	0	0	0	0	0	0	0	0	0	0	0	0	0	0	0	0	0	0	0	0	0	0
Otu01176	Bacteria(100)	Proteobacteria(100)	Alphaproteobacteria(100)	Rhizobiales(100)	Methylobacteriaceae(100)	Methylobacterium(100)	0	5	0	0	0	38	0	27	0	0	0	0	0	2	0	7	0	10	0	0	0	1	1	0	2	0	0	0	0	0	0	0	0	0	0	0	0	2	1	0	2	0	0
Otu01204	Bacteria(100)	Bacteroidetes(100)	Sphingobacteria(100)	Sphingobacteriales(100)	Cytophagaceae(100)	Rhodocytophaga(100)	0	0	0	0	0	0	0	0	0	0	0	0	253	0	0	0	0	0	0	0	0	0	0	0	0	0	0	0	0	0	0	0	0	0	0	0	0	0	0	0	0	0	0
Otu01207	Bacteria(100)	Firmicutes(100)	Clostridia(100)	Clostridiales(100)	Clostridiales_unclassified(100)	Clostridiales_unclassified(100)	0	0	0	0	0	0	0	0	0	0	0	0	0	0	0	1	0	1	0	0	0	0	1	0	0	0	0	0	0	0	0	0	0	0	0	0	0	0	0	0	0	0	0
Otu01208	Bacteria(100)	Proteobacteria(100)	Alphaproteobacteria(100)	Rhodobacterales(100)	Rhodobacteraceae(100)	Rhodobacteraceae_unclassified(100)	0	0	0	0	0	0	0	0	0	0	0	0	0	0	0	0	0	0	0	0	0	0	0	0	0	0	0	0	0	0	0	0	0	0	0	0	0	0	0	0	0	0	0
Otu01209	Bacteria(100)	Bacteria_unclassified(100)	Bacteria_unclassified(100)	Bacteria_unclassified(100)	Bacteria_unclassified(100)	Bacteria_unclassified(100)	0	0	0	0	0	0	0	0	0	0	0	0	0	0	0	0	0	0	0	0	0	0	0	0	0	0	0	0	0	0	0	0	0	0	0	0	0	0	0	0	0	0	0
Otu01210	Bacteria(100)	Proteobacteria(100)	Alphaproteobacteria(100)	Rhodospirillales(100)	Acetobacteraceae(100)	Acetobacteraceae_unclassified(100)	0	0	0	0	0	0	0	0	0	0	0	0	0	0	0	0	0	0	0	0	0	0	0	0	0	0	0	0	0	0	0	0	0	0	0	0	0	40	163	0	49	0	0
Otu01206	Bacteria(100)	Bacteria_unclassified(100)	Bacteria_unclassified(100)	Bacteria_unclassified(100)	Bacteria_unclassified(100)	Bacteria_unclassified(100)	0	0	0	0	0	0	0	0	0	0	0	0	0	0	0	0	0	0	0	0	0	0	0	0	0	0	0	0	0	0	0	0	0	0	0	0	0	0	0	0	0	0	0
Otu00868	Bacteria(100)	Firmicutes(100)	Bacilli(100)	Bacillales(100)	Bacillaceae_1(100)	Bacillus(96)	0	32	0	0	0	0	0	27	0	0	0	0	0	0	0	0	0	0	2	0	0	0	0	0	0	0	0	0	0	0	0	0	0	0	0	0	0	0	0	0	0	0	0
Otu01213	Bacteria(100)	Firmicutes(100)	Clostridia(100)	Clostridiales(100)	Ruminococcaceae(100)	Ruminococcaceae_unclassified(100)	0	0	0	0	0	0	0	0	0	0	0	0	0	0	0	0	0	0	0	0	0	0	0	0	0	0	0	0	0	0	0	0	0	0	0	0	0	0	0	0	0	0	0
Otu01215	Bacteria(100)	Bacteroidetes(100)	Sphingobacteria(100)	Sphingobacteriales(100)	Sphingobacteriales_unclassified(98)	Sphingobacteriales_unclassified(98)	0	0	0	0	0	0	0	0	0	0	0	0	0	0	0	0	0	0	0	0	0	0	0	0	0	0	0	0	0	0	0	0	0	0	0	0	0	0	0	0	0	0	0
Otu01214	Bacteria(100)	Actinobacteria(100)	Actinobacteria(100)	Actinomycetales(100)	Actinomycetales_unclassified(100)	Actinomycetales_unclassified(100)	0	0	0	0	0	0	0	0	0	0	0	0	0	0	0	0	1	0	0	0	0	0	0	0	0	0	0	0	0	0	0	0	0	0	0	0	0	0	0	0	27	0	1
Otu01216	Bacteria(100)	Proteobacteria(100)	Gammaproteobacteria(100)	Legionellales(100)	Legionellaceae(100)	Legionella(100)	0	0	0	0	0	0	0	0	0	0	0	0	0	0	0	0	0	0	0	0	0	0	0	0	0	0	0	0	0	0	0	0	0	0	0	0	0	0	0	0	0	0	0
Otu01219	Bacteria(100)	Firmicutes(100)	Clostridia(100)	Clostridiales(100)	Lachnospiraceae(100)	Clostridium_XlVb(100)	0	0	0	0	0	0	0	0	0	0	0	0	0	0	0	0	0	0	0	0	0	0	0	0	0	0	0	0	0	0	0	0	0	0	0	0	0	0	0	0	0	0	0
Otu01220	Bacteria(100)	Proteobacteria(100)	Alphaproteobacteria(100)	Rhodospirillales(100)	Acetobacteraceae(100)	Roseomonas(100)	0	0	19	0	0	0	0	0	0	0	0	0	0	0	0	0	0	0	0	0	0	0	0	0	0	0	0	0	0	0	0	0	0	0	0	0	0	0	0	0	0	0	0
Otu01221	Bacteria(100)	Proteobacteria(100)	Gammaproteobacteria(100)	Thiotrichales(100)	Thiotrichaceae(100)	Thiothrix(100)	0	0	0	0	0	0	0	0	0	0	0	0	0	0	0	0	0	0	0	0	0	0	0	0	0	0	0	0	0	0	0	0	0	0	0	0	0	0	0	0	0	0	0
Otu00924	Bacteria(100)	Firmicutes(100)	Clostridia(100)	Clostridiales(100)	Lachnospiraceae(100)	Clostridium_XlVa(86)	0	0	0	19	0	0	0	1	0	0	0	0	0	0	0	0	0	0	0	0	0	2	2	0	6	0	0	0	0	0	0	0	0	0	0	0	0	0	20	0	7	0	0
Otu01218	Bacteria(100)	Verrucomicrobia(100)	Spartobacteria(100)	Spartobacteria_order_incertae_sedis(100)	Spartobacteria_family_incertae_sedis(100)	Spartobacteria_family_incertae_sedis_unclassified(96)	1	0	2	0	0	0	0	0	0	0	0	0	0	5	0	0	0	0	0	0	0	0	0	0	0	0	0	0	0	0	0	0	0	0	0	0	0	121	40	0	25	0	0
Otu01222	Bacteria(100)	Firmicutes(100)	Clostridia(100)	Clostridiales(100)	Clostridiales_Incertae_Sedis_XI(100)	Sporanaerobacter(100)	0	21	0	0	0	0	0	0	0	0	0	0	0	0	0	0	0	0	0	0	0	0	0	0	0	0	0	0	0	0	0	0	0	0	0	0	0	0	0	0	0	0	0
Otu01223	Bacteria(100)	Bacteroidetes(100)	Bacteroidetes_unclassified(100)	Bacteroidetes_unclassified(100)	Bacteroidetes_unclassified(100)	Bacteroidetes_unclassified(100)	0	0	0	0	0	0	0	0	0	0	0	0	0	0	0	0	0	0	0	0	0	0	0	0	0	0	0	0	0	0	0	0	0	0	0	0	0	0	0	0	0	0	0
Otu01224	Bacteria(100)	Proteobacteria(100)	Deltaproteobacteria(100)	Bdellovibrionales(100)	Bacteriovoracaceae(100)	Peredibacter(100)	0	0	0	0	0	0	0	0	0	0	0	0	0	0	0	0	0	0	0	0	0	0	0	0	0	0	0	0	0	0	0	0	0	0	0	0	0	0	0	0	0	0	0
Otu01186	Bacteria(100)	Proteobacteria(100)	Gammaproteobacteria(100)	Gammaproteobacteria_unclassified(56)	Gammaproteobacteria_unclassified(56)	Gammaproteobacteria_unclassified(56)	0	0	0	0	0	0	0	0	0	0	0	0	0	0	0	0	0	0	0	0	0	0	0	0	0	0	0	0	0	0	0	0	0	0	0	0	103	67	40	0	31	0	0
Otu01225	Bacteria(100)	Bacteroidetes(100)	Sphingobacteria(100)	Sphingobacteriales(100)	Chitinophagaceae(100)	Chitinophagaceae_unclassified(91)	0	0	0	0	0	0	0	0	0	0	0	0	0	0	0	0	0	0	0	0	0	0	0	0	0	0	0	0	0	0	0	0	0	0	0	0	0	75	0	0	0	0	0
Otu01226	Bacteria(100)	Bacteroidetes(100)	Bacteroidetes_unclassified(100)	Bacteroidetes_unclassified(100)	Bacteroidetes_unclassified(100)	Bacteroidetes_unclassified(100)	0	0	0	0	0	0	0	0	0	0	0	0	0	0	0	0	0	0	0	0	0	0	0	0	0	0	0	0	0	0	0	0	0	0	0	0	0	0	0	0	0	0	0
Otu01227	Bacteria(100)	Bacteria_unclassified(100)	Bacteria_unclassified(100)	Bacteria_unclassified(100)	Bacteria_unclassified(100)	Bacteria_unclassified(100)	2	9	0	0	0	0	0	0	0	0	0	0	0	1	0	0	0	0	0	0	0	0	0	0	0	0	0	0	0	0	0	0	0	0	0	0	0	0	0	0	0	0	0
Otu01228	Bacteria(100)	Bacteria_unclassified(100)	Bacteria_unclassified(100)	Bacteria_unclassified(100)	Bacteria_unclassified(100)	Bacteria_unclassified(100)	0	0	0	0	0	0	0	0	0	0	0	0	0	0	0	0	0	0	0	0	0	0	0	0	0	0	0	0	0	0	0	0	0	0	0	0	0	0	0	0	0	0	0
Otu01229	Bacteria(100)	Actinobacteria(100)	Actinobacteria(100)	Coriobacteriales(100)	Coriobacteriaceae(100)	Coriobacteriaceae_unclassified(100)	0	0	0	0	0	0	0	0	0	0	0	0	0	0	0	0	0	0	0	0	0	0	0	0	0	0	0	0	0	0	0	0	0	0	0	0	0	0	0	0	0	0	0
Otu01230	Bacteria(100)	Bacteroidetes(100)	Sphingobacteria(100)	Sphingobacteriales(100)	Rhodothermaceae(98)	Rhodothermaceae_unclassified(98)	0	0	0	0	0	0	0	0	0	0	0	0	0	0	0	0	0	0	0	0	0	0	0	0	0	0	0	0	0	0	0	0	0	0	0	0	0	0	0	0	0	0	0
Otu01231	Bacteria(100)	Planctomycetes(100)	Planctomycetacia(100)	Planctomycetales(100)	Planctomycetaceae(100)	Singulisphaera(100)	0	0	0	0	0	0	0	0	0	0	0	0	0	0	0	0	0	0	0	22	17	33	3	0	7	0	0	0	0	0	0	0	0	0	0	0	0	40	0	0	9	0	0
Otu01232	Bacteria(100)	Planctomycetes(100)	Planctomycetacia(100)	Planctomycetales(100)	Planctomycetaceae(100)	Zavarzinella(100)	2	0	0	0	0	0	0	0	0	0	0	0	0	0	0	0	0	0	0	0	0	0	0	0	0	0	0	0	0	0	0	0	0	0	0	0	0	0	0	0	0	0	0
Otu01233	Bacteria(100)	Bacteria_unclassified(100)	Bacteria_unclassified(100)	Bacteria_unclassified(100)	Bacteria_unclassified(100)	Bacteria_unclassified(100)	0	0	5	0	0	0	0	0	0	0	0	0	0	0	0	0	0	0	0	4	0	0	0	0	0	0	0	0	0	0	0	0	0	0	0	0	0	0	0	0	0	0	0
Otu01234	Bacteria(100)	OD1(100)	OD1_class_incertae_sedis(100)	OD1_order_incertae_sedis(100)	OD1_family_incertae_sedis(100)	OD1_genus_incertae_sedis(100)	0	0	0	0	0	0	0	0	0	0	0	0	0	0	0	0	0	0	0	0	0	0	0	0	0	0	0	0	0	0	0	0	0	0	0	0	0	0	0	0	0	0	0
Otu01235	Bacteria(100)	Proteobacteria(100)	Betaproteobacteria(100)	Betaproteobacteria_unclassified(100)	Betaproteobacteria_unclassified(100)	Betaproteobacteria_unclassified(100)	0	0	0	0	0	0	0	0	0	0	0	0	0	0	0	0	0	0	0	0	0	0	0	0	0	0	0	0	0	0	0	0	0	0	0	0	0	0	0	0	0	0	0
Otu01236	Bacteria(100)	Bacteroidetes(100)	Bacteroidia(100)	Bacteroidales(100)	Porphyromonadaceae(100)	Porphyromonas(100)	0	0	0	0	0	0	0	0	0	0	0	0	0	0	0	0	0	0	0	0	0	0	0	0	0	0	0	0	0	0	0	0	0	0	0	0	0	0	0	0	15	0	0
Otu01217	Bacteria(100)	Actinobacteria(100)	Actinobacteria(100)	Actinomycetales(100)	Actinomycetales_unclassified(100)	Actinomycetales_unclassified(100)	0	0	0	0	0	65	0	0	0	0	0	0	0	0	0	0	0	0	0	0	0	0	0	0	0	0	0	0	0	0	2	0	0	0	0	0	0	0	0	26	8	0	0
Otu01237	Bacteria(100)	Proteobacteria(100)	Alphaproteobacteria(100)	Rhizobiales(100)	Bradyrhizobiaceae(100)	Bradyrhizobiaceae_unclassified(100)	0	0	0	0	0	0	0	0	0	0	0	0	0	0	0	0	0	0	0	0	0	0	2	0	0	0	0	0	0	0	0	0	0	0	0	0	0	143	44	0	0	0	0
Otu01239	Bacteria(100)	Actinobacteria(70)	Actinobacteria(70)	Actinobacteria_unclassified(70)	Actinobacteria_unclassified(70)	Actinobacteria_unclassified(70)	0	0	0	0	0	25	0	0	0	0	0	0	0	0	0	2	0	0	0	0	0	0	0	0	0	0	0	0	0	0	0	0	0	0	0	0	0	15	0	0	41	0	12
Otu01240	Bacteria(100)	Firmicutes(100)	Clostridia(100)	Clostridiales(100)	Lachnospiraceae(100)	Lachnospiraceae_unclassified(100)	0	0	0	0	0	0	0	0	0	0	0	0	0	0	0	0	0	0	0	0	0	0	0	0	0	0	0	0	0	0	0	0	0	0	0	0	0	0	0	0	0	0	0
Otu01241	Bacteria(100)	Actinobacteria(100)	Actinobacteria(100)	Actinomycetales(100)	Actinomycetaceae(100)	Actinomycetaceae_unclassified(100)	0	0	0	0	0	0	0	0	0	0	0	0	0	241	0	0	0	0	0	0	0	0	0	0	0	0	0	0	0	0	0	0	0	0	0	0	0	0	0	0	0	0	0
Otu01242	Bacteria(100)	Firmicutes(100)	Clostridia(100)	Clostridiales(100)	Lachnospiraceae(100)	Lachnospiraceae_unclassified(100)	0	0	0	0	0	0	0	0	0	0	0	0	0	0	0	0	0	0	0	6	21	35	8	2	27	0	0	0	0	0	2	0	0	0	0	0	14	0	0	0	0	0	0
Otu01243	Bacteria(100)	Bacteria_unclassified(100)	Bacteria_unclassified(100)	Bacteria_unclassified(100)	Bacteria_unclassified(100)	Bacteria_unclassified(100)	0	0	0	0	0	0	0	0	0	0	0	0	0	0	0	0	0	0	0	0	0	0	0	0	0	0	0	0	0	0	0	0	0	0	0	0	0	0	0	0	0	0	0
Otu01245	Bacteria(100)	Bacteroidetes(100)	Bacteroidia(100)	Bacteroidales(100)	Prevotellaceae(100)	Prevotella(100)	0	0	0	0	0	0	0	0	0	0	0	0	0	0	0	0	0	0	0	0	0	0	0	0	0	0	0	0	0	0	0	0	0	0	0	0	0	0	0	0	0	0	0
Otu01249	Bacteria(100)	Bacteria_unclassified(100)	Bacteria_unclassified(100)	Bacteria_unclassified(100)	Bacteria_unclassified(100)	Bacteria_unclassified(100)	0	0	0	0	0	0	0	0	0	0	0	0	0	0	0	0	0	3	0	0	0	0	0	0	0	0	0	0	0	0	0	0	0	0	0	0	0	0	0	0	0	0	0
Otu01250	Bacteria(100)	Bacteria_unclassified(100)	Bacteria_unclassified(100)	Bacteria_unclassified(100)	Bacteria_unclassified(100)	Bacteria_unclassified(100)	0	0	0	0	0	0	0	0	0	0	0	0	0	0	0	0	0	0	0	0	0	0	0	0	0	0	0	0	0	0	0	0	0	0	0	0	0	0	0	0	0	0	0
Otu01251	Bacteria(100)	Firmicutes(100)	Clostridia(100)	Clostridiales(100)	Clostridiaceae_1(100)	Clostridium_sensu_stricto(100)	0	0	0	0	0	0	0	0	0	0	0	0	0	0	0	0	0	0	0	0	0	0	0	0	0	0	0	0	0	0	0	0	0	0	0	0	0	0	0	0	0	0	0
Otu01246	Bacteria(100)	Planctomycetes(100)	Planctomycetacia(100)	Planctomycetales(100)	Planctomycetaceae(100)	Singulisphaera(100)	0	0	0	0	0	0	0	0	0	0	0	0	0	1	0	0	0	8	0	0	3	13	2	0	0	0	0	0	0	0	0	0	0	0	0	0	0	0	0	0	0	0	0
Otu01252	Bacteria(100)	Planctomycetes(100)	Planctomycetacia(100)	Planctomycetales(100)	Planctomycetaceae(100)	Planctomycetaceae_unclassified(55)	0	0	0	0	0	0	0	0	0	4	0	0	0	0	0	0	0	0	0	0	0	0	0	0	0	0	0	0	0	0	0	0	0	0	0	0	0	0	0	0	0	0	0
Otu01253	Bacteria(100)	Proteobacteria(100)	Proteobacteria_unclassified(90)	Proteobacteria_unclassified(90)	Proteobacteria_unclassified(90)	Proteobacteria_unclassified(90)	0	0	0	0	0	0	0	0	0	0	0	0	0	0	0	0	0	0	0	0	0	0	0	0	0	0	0	0	0	0	0	0	0	0	0	0	0	1	0	0	2	0	0
Otu01248	Bacteria(100)	Planctomycetes(100)	Planctomycetacia(100)	Planctomycetales(100)	Planctomycetaceae(100)	Planctomycetaceae_unclassified(100)	0	0	0	0	0	0	0	0	0	0	0	0	0	17	0	0	0	0	0	0	0	0	0	0	0	0	0	0	0	0	0	0	0	0	0	0	0	0	0	0	0	0	0
Otu01255	Bacteria(100)	Bacteria_unclassified(100)	Bacteria_unclassified(100)	Bacteria_unclassified(100)	Bacteria_unclassified(100)	Bacteria_unclassified(100)	0	0	0	0	0	0	0	0	0	0	0	0	0	0	0	0	0	0	0	0	0	0	0	0	0	0	0	0	0	0	0	0	0	0	0	0	0	0	0	0	0	0	0
Otu01257	Bacteria(100)	Bacteroidetes(100)	Sphingobacteria(100)	Sphingobacteriales(100)	Saprospiraceae(99)	Saprospiraceae_unclassified(99)	0	0	0	0	0	0	0	0	0	0	0	0	0	0	0	0	0	0	0	0	0	0	0	0	0	0	0	0	0	0	0	0	0	0	0	0	0	0	0	0	0	0	0
Otu01258	Bacteria(100)	Actinobacteria(100)	Actinobacteria(100)	Actinomycetales(100)	Micromonosporaceae(100)	Micromonosporaceae_unclassified(68)	0	0	0	0	0	0	0	0	0	0	0	0	0	0	0	0	0	0	0	0	0	0	0	0	0	0	0	0	0	0	0	0	0	0	0	0	0	19	97	0	7	0	0
Otu01260	Bacteria(100)	OD1(100)	OD1_class_incertae_sedis(100)	OD1_order_incertae_sedis(100)	OD1_family_incertae_sedis(100)	OD1_genus_incertae_sedis(100)	0	0	0	0	0	0	0	0	0	0	0	0	0	0	0	0	0	0	0	0	0	0	0	0	0	0	0	0	0	0	0	0	0	0	0	0	0	0	0	0	0	0	0
Otu01212	Bacteria(100)	Proteobacteria(100)	Alphaproteobacteria(100)	Rhizobiales(100)	Rhizobiales_unclassified(96)	Rhizobiales_unclassified(96)	0	0	0	0	0	0	0	5	0	0	0	0	0	0	0	0	0	2	0	0	0	0	0	0	0	0	0	0	0	0	0	0	0	0	0	0	0	1	5	0	0	0	0
Otu01254	Bacteria(100)	Bacteria_unclassified(100)	Bacteria_unclassified(100)	Bacteria_unclassified(100)	Bacteria_unclassified(100)	Bacteria_unclassified(100)	0	0	0	0	0	0	0	0	0	0	0	0	0	0	0	0	0	0	0	0	0	0	0	0	0	0	0	0	0	0	0	10	3	0	0	0	0	0	0	0	0	0	0
Otu01256	Bacteria(100)	Firmicutes(100)	Clostridia(100)	Clostridiales(100)	Ruminococcaceae(100)	Clostridium_III(100)	0	0	0	0	0	0	0	0	1	0	0	0	0	0	0	0	0	0	0	0	0	0	0	0	0	0	0	0	0	0	0	0	0	0	0	0	0	0	0	0	0	0	0
Otu01259	Bacteria(100)	Proteobacteria(100)	Gammaproteobacteria(100)	Xanthomonadales(100)	Xanthomonadaceae(100)	Xanthomonadaceae_unclassified(76)	1	0	5	0	0	0	0	0	0	0	0	0	0	0	0	0	0	0	0	0	0	0	0	0	0	0	0	0	0	0	4	0	0	0	0	0	0	31	0	0	0	0	94
Otu01262	Bacteria(100)	Proteobacteria(100)	Betaproteobacteria(100)	Burkholderiales(100)	Burkholderiales_unclassified(94)	Burkholderiales_unclassified(94)	0	0	0	0	0	0	1	0	1	0	0	0	0	0	2	0	0	0	0	0	0	0	0	0	0	0	0	0	0	0	0	0	0	0	0	0	0	64	3	0	19	0	0
Otu01263	Bacteria(100)	Firmicutes(100)	Clostridia(100)	Clostridiales(100)	Clostridiaceae_1(100)	Clostridium_sensu_stricto(100)	1	0	0	0	0	0	0	0	0	0	0	0	0	0	0	0	1	0	0	0	0	0	0	0	0	0	0	0	0	0	0	0	0	0	0	0	0	1	0	0	0	0	0
Otu01102	Bacteria(100)	Bacteroidetes(100)	Bacteroidia(100)	Bacteroidales(100)	Porphyromonadaceae(100)	Parabacteroides(62)	0	0	0	0	0	0	0	0	0	0	0	0	0	10	0	0	0	0	0	0	0	0	0	0	0	0	0	0	0	0	0	0	0	0	0	0	0	0	0	0	0	0	0
Otu01261	Bacteria(100)	Planctomycetes(100)	Planctomycetacia(100)	Planctomycetales(100)	Planctomycetaceae(100)	Planctomyces(92)	0	0	0	0	0	0	0	0	0	0	0	0	0	0	0	0	0	0	0	0	0	0	0	0	0	0	0	0	0	0	0	0	0	0	0	0	0	0	0	0	18	0	0
Otu01264	Bacteria(100)	Bacteria_unclassified(100)	Bacteria_unclassified(100)	Bacteria_unclassified(100)	Bacteria_unclassified(100)	Bacteria_unclassified(100)	0	0	0	0	0	0	0	0	0	0	0	0	0	2	0	0	0	0	0	0	0	0	0	0	0	0	0	0	0	0	0	0	0	0	0	0	0	52	0	0	0	0	0
Otu01265	Bacteria(100)	Bacteria_unclassified(100)	Bacteria_unclassified(100)	Bacteria_unclassified(100)	Bacteria_unclassified(100)	Bacteria_unclassified(100)	0	0	0	0	0	0	0	0	0	0	0	0	0	0	0	0	0	0	0	0	0	0	0	0	0	0	0	0	0	0	0	0	0	0	0	0	0	0	0	0	0	0	0
Otu01266	Bacteria(100)	Bacteroidetes(100)	Sphingobacteria(100)	Sphingobacteriales(100)	Sphingobacteriales_unclassified(100)	Sphingobacteriales_unclassified(100)	0	0	0	0	0	0	0	0	0	0	0	0	0	0	0	0	0	0	0	0	0	0	0	0	0	0	0	0	0	0	0	0	0	0	0	0	0	0	0	0	0	0	0
Otu01267	Bacteria(100)	Bacteria_unclassified(100)	Bacteria_unclassified(100)	Bacteria_unclassified(100)	Bacteria_unclassified(100)	Bacteria_unclassified(100)	0	0	0	0	0	0	0	0	0	0	0	0	0	0	0	0	0	0	0	0	0	0	0	0	0	0	0	0	0	0	0	0	0	0	0	0	0	0	0	0	0	0	0
Otu01268	Bacteria(100)	Actinobacteria(100)	Actinobacteria(100)	Actinomycetales(100)	Pseudonocardiaceae(100)	Pseudonocardiaceae_unclassified(95)	0	0	3	0	0	0	0	0	0	0	0	0	0	0	0	0	0	0	0	0	0	3	0	0	0	0	0	0	0	0	0	0	0	0	0	0	0	3	0	0	2	0	0
Otu01269	Bacteria(100)	Bacteroidetes(100)	Sphingobacteria(97)	Sphingobacteriales(97)	Sphingobacteriales_unclassified(97)	Sphingobacteriales_unclassified(97)	0	0	0	0	0	0	0	0	0	0	0	0	0	0	0	0	0	0	0	0	0	0	0	0	0	0	0	0	0	0	0	0	0	0	0	0	0	0	0	0	0	0	0
Otu01270	Bacteria(100)	Verrucomicrobia(100)	Verrucomicrobia_unclassified(100)	Verrucomicrobia_unclassified(100)	Verrucomicrobia_unclassified(100)	Verrucomicrobia_unclassified(100)	0	0	0	0	0	0	0	0	0	0	0	0	0	0	0	0	0	0	0	0	0	0	0	0	0	0	0	0	0	0	0	0	0	0	0	2	0	11	0	0	14	0	0
Otu01244	Bacteria(100)	Firmicutes(100)	Clostridia(100)	Clostridiales(100)	Lachnospiraceae(98)	Lachnospiraceae_unclassified(95)	0	0	0	0	0	0	0	0	0	0	0	0	0	0	0	0	0	0	0	0	1	0	0	0	0	0	0	0	0	0	0	0	0	0	0	0	0	136	24	0	0	0	0
Otu01271	Bacteria(100)	Actinobacteria(100)	Actinobacteria(100)	Actinomycetales(100)	Actinomycetales_unclassified(100)	Actinomycetales_unclassified(100)	0	34	4	0	0	12	2	0	0	0	0	0	0	0	0	0	0	0	0	0	0	0	0	0	0	2	0	0	0	0	0	0	0	0	0	0	0	0	8	0	28	0	0
Otu01272	Bacteria(100)	Firmicutes(100)	Clostridia(100)	Clostridiales(100)	Lachnospiraceae(100)	Coprococcus(100)	0	0	0	0	0	0	0	0	0	0	0	0	0	0	231	0	0	0	0	0	0	0	0	0	0	0	0	0	0	0	0	0	0	0	0	0	0	0	0	0	0	0	0
Otu01174	Bacteria(100)	Actinobacteria(100)	Actinobacteria(100)	Actinobacteria_unclassified(100)	Actinobacteria_unclassified(100)	Actinobacteria_unclassified(100)	0	29	6	2	0	0	0	12	0	0	0	0	0	0	0	3	0	1	1	0	0	1	0	0	0	0	0	0	0	0	0	12	0	0	0	5	0	0	40	0	13	0	26
Otu01274	Bacteria(100)	Firmicutes(100)	Negativicutes(100)	Selenomonadales(100)	Veillonellaceae(100)	Mitsuokella(100)	0	0	0	0	0	0	0	0	0	0	0	0	0	0	0	0	0	0	0	0	0	0	0	0	0	0	0	0	0	0	0	0	0	0	0	0	0	0	0	0	0	0	0
Otu01276	Bacteria(100)	Proteobacteria(100)	Alphaproteobacteria(100)	Rhodospirillales(100)	Acetobacteraceae(100)	Acetobacteraceae_unclassified(100)	0	0	0	0	0	0	0	0	0	0	0	0	0	0	0	0	0	0	0	0	0	0	0	0	0	0	0	0	0	0	0	0	0	0	0	0	0	2	120	29	81	0	0
Otu01277	Bacteria(100)	Acidobacteria(100)	Acidobacteria_Gp6(100)	Acidobacteria_Gp6_order_incertae_sedis(100)	Acidobacteria_Gp6_family_incertae_sedis(100)	Gp6(100)	0	0	0	0	0	0	0	0	0	0	0	0	0	6	0	0	0	0	0	0	0	0	0	0	0	0	0	0	0	0	0	0	0	0	0	0	0	0	0	0	0	0	0
Otu01278	Bacteria(100)	Actinobacteria(100)	Actinobacteria(100)	Actinomycetales(100)	Micromonosporaceae(100)	Micromonosporaceae_unclassified(100)	1	58	0	0	4	163	0	0	0	0	0	0	0	0	0	0	0	0	0	0	0	0	0	0	0	0	0	0	0	0	0	0	0	0	0	0	0	0	0	0	0	0	0
Otu01193	Bacteria(100)	Firmicutes(100)	Clostridia(100)	Clostridiales(100)	Lachnospiraceae(100)	Lachnospiraceae_unclassified(100)	0	0	0	0	0	0	0	0	0	0	0	0	0	0	0	0	0	0	3	0	0	0	0	0	0	0	0	0	0	0	0	0	0	0	0	0	0	0	0	0	0	0	0
Otu01279	Bacteria(100)	Proteobacteria(100)	Alphaproteobacteria(100)	Rhodospirillales(100)	Acetobacteraceae(100)	Acetobacteraceae_unclassified(96)	0	0	21	0	0	0	4	0	0	0	0	0	0	0	0	0	0	0	0	0	0	0	0	0	0	0	0	0	0	0	0	0	0	0	0	0	0	45	111	0	0	0	0
Otu01280	Bacteria(100)	Bacteria_unclassified(100)	Bacteria_unclassified(100)	Bacteria_unclassified(100)	Bacteria_unclassified(100)	Bacteria_unclassified(100)	0	0	0	0	0	0	0	0	0	0	0	0	0	0	0	0	0	0	0	0	0	0	0	0	0	0	0	0	0	0	0	0	0	0	0	0	0	0	0	0	0	0	0
Otu01281	Bacteria(100)	Proteobacteria(100)	Gammaproteobacteria(100)	Pseudomonadales(100)	Moraxellaceae(100)	Moraxellaceae_unclassified(100)	0	0	0	0	0	0	0	0	0	0	0	0	0	0	0	0	0	0	0	0	0	0	0	0	0	0	0	0	0	0	0	0	0	0	0	0	0	0	0	0	0	0	0
Otu01205	Bacteria(100)	Proteobacteria(100)	Alphaproteobacteria(100)	Rhizobiales(100)	Rhizobiales_unclassified(99)	Rhizobiales_unclassified(99)	0	0	0	0	0	0	0	0	0	0	0	0	0	0	0	0	0	0	0	0	0	0	0	0	0	0	0	0	0	0	0	0	0	0	0	0	0	0	84	0	57	0	29
Otu01282	Bacteria(100)	Actinobacteria(100)	Actinobacteria(100)	Solirubrobacterales(100)	Conexibacteraceae(99)	Conexibacter(99)	0	0	0	0	0	0	0	0	0	0	0	0	0	0	0	0	0	0	0	0	0	0	0	0	0	0	0	0	0	0	0	0	0	0	0	0	0	6	0	0	0	0	212
Otu01283	Bacteria(100)	Proteobacteria(100)	Alphaproteobacteria(100)	Rhodospirillales(100)	Acetobacteraceae(100)	Acetobacteraceae_unclassified(100)	0	0	0	0	0	0	0	0	0	0	0	0	0	0	0	0	0	0	0	0	0	0	0	0	0	0	0	0	0	0	0	0	0	0	0	0	0	173	0	0	54	0	0
Otu01284	Bacteria(100)	Bacteria_unclassified(100)	Bacteria_unclassified(100)	Bacteria_unclassified(100)	Bacteria_unclassified(100)	Bacteria_unclassified(100)	0	0	0	0	0	0	3	0	0	0	0	0	0	0	0	0	0	0	0	0	0	0	0	0	0	0	0	0	0	0	0	0	0	0	0	0	0	0	0	0	0	0	0
Otu01285	Bacteria(100)	Proteobacteria(100)	Alphaproteobacteria(100)	Rhizobiales(100)	Phyllobacteriaceae(100)	Mesorhizobium(97)	0	0	0	0	0	0	0	0	0	0	0	0	0	0	0	10	3	0	0	0	0	0	0	0	2	0	0	0	0	0	1	0	10	0	0	17	0	0	0	0	2	0	0
Otu01286	Bacteria(100)	Planctomycetes(100)	Planctomycetacia(100)	Planctomycetales(100)	Planctomycetaceae(100)	Planctomycetaceae_unclassified(100)	0	0	0	0	0	0	0	0	0	0	0	0	0	4	0	0	0	0	0	0	0	0	10	0	0	0	0	0	0	0	0	0	0	0	0	0	0	0	0	0	0	0	0
Otu01287	Bacteria(100)	Bacteroidetes(100)	Sphingobacteria(100)	Sphingobacteriales(100)	Cytophagaceae(100)	Cytophagaceae_unclassified(100)	0	0	0	0	0	0	0	0	0	0	0	0	0	0	0	0	0	0	0	0	0	0	0	0	0	0	0	0	0	0	0	0	0	0	0	0	0	0	0	0	0	0	0
Otu01288	Bacteria(100)	Armatimonadetes(100)	Armatimonadia(100)	Armatimonadales(100)	Armatimonadaceae(100)	Armatimonas_Armatimonadetes_gp1(100)	0	0	0	0	0	0	0	0	0	0	0	0	0	0	0	0	0	0	0	0	0	0	0	0	0	0	0	0	0	0	0	0	0	0	0	0	0	0	0	0	0	0	0
Otu01290	Bacteria(100)	Proteobacteria(100)	Proteobacteria_unclassified(55)	Proteobacteria_unclassified(55)	Proteobacteria_unclassified(55)	Proteobacteria_unclassified(55)	0	0	0	0	0	0	0	0	0	0	0	0	0	0	0	0	0	3	0	0	0	0	0	0	0	0	0	0	0	0	0	0	0	0	0	0	0	0	0	0	0	0	0
Otu01291	Bacteria(100)	Acidobacteria(100)	Acidobacteria_Gp3(100)	Acidobacteria_Gp3_order_incertae_sedis(100)	Acidobacteria_Gp3_family_incertae_sedis(100)	Gp3(100)	0	0	0	0	0	0	0	0	0	0	0	0	0	0	0	0	0	0	0	0	0	0	0	0	0	0	0	0	0	0	0	0	0	0	0	0	0	0	0	0	0	0	0
Otu01292	Bacteria(100)	Proteobacteria(100)	Epsilonproteobacteria(100)	Campylobacterales(100)	Helicobacteraceae(100)	Helicobacter(100)	0	0	0	0	0	0	0	0	0	0	0	0	0	0	0	0	0	0	0	0	0	0	0	0	0	0	0	0	0	0	0	0	0	0	0	0	0	0	0	0	0	0	0
Otu01293	Bacteria(100)	Proteobacteria(100)	Alphaproteobacteria(100)	Rhodobacterales(100)	Rhodobacteraceae(100)	Rubellimicrobium(100)	0	0	0	0	0	0	0	0	0	0	0	0	0	0	0	0	0	0	0	0	0	0	0	0	0	0	0	0	0	0	0	0	0	0	0	0	0	104	121	0	0	0	0
Otu01294	Bacteria(100)	Bacteria_unclassified(100)	Bacteria_unclassified(100)	Bacteria_unclassified(100)	Bacteria_unclassified(100)	Bacteria_unclassified(100)	0	0	0	0	0	0	0	0	0	0	0	0	0	0	0	0	0	0	0	0	0	0	0	0	0	0	0	0	0	0	0	0	0	0	0	0	0	0	0	0	0	0	0
Otu01295	Bacteria(100)	Planctomycetes(100)	Planctomycetacia(100)	Planctomycetales(100)	Planctomycetaceae(100)	Planctomycetaceae_unclassified(100)	0	0	0	0	0	0	0	0	0	0	0	0	0	0	0	0	0	0	0	0	0	4	0	0	5	0	0	0	0	0	0	0	0	0	0	0	0	0	89	0	0	0	0
Otu01296	Bacteria(100)	SR1(100)	SR1_class_incertae_sedis(100)	SR1_order_incertae_sedis(100)	SR1_family_incertae_sedis(100)	SR1_genus_incertae_sedis(100)	0	0	0	0	0	0	0	0	0	0	0	0	0	0	0	0	0	0	0	0	0	0	0	0	0	0	0	0	0	0	0	0	9	0	0	0	0	0	0	0	0	0	0
Otu01298	Bacteria(100)	Verrucomicrobia(100)	Spartobacteria(100)	Spartobacteria_order_incertae_sedis(100)	Spartobacteria_family_incertae_sedis(100)	Spartobacteria_genera_incertae_sedis(100)	0	0	0	0	0	0	0	0	0	0	0	0	0	0	0	0	0	0	0	0	0	0	0	0	0	0	0	0	0	0	0	0	0	0	0	0	0	0	0	0	0	0	0
Otu01299	Bacteria(100)	Proteobacteria(100)	Betaproteobacteria(100)	Betaproteobacteria_unclassified(100)	Betaproteobacteria_unclassified(100)	Betaproteobacteria_unclassified(100)	0	0	0	0	0	0	0	0	0	0	0	0	0	0	0	0	0	0	0	0	0	0	0	0	0	0	0	0	0	0	0	0	0	0	0	0	0	0	0	0	0	0	0
Otu01297	Bacteria(100)	Actinobacteria(100)	Actinobacteria(100)	Actinomycetales(100)	Dermabacteraceae(100)	Brachybacterium(100)	0	0	0	0	0	0	0	8	0	0	0	0	0	0	0	0	0	0	0	0	0	0	0	0	0	0	0	0	0	0	0	0	0	0	0	0	0	78	0	0	0	0	7
Otu01211	Bacteria(100)	Proteobacteria(100)	Alphaproteobacteria(100)	Rhodospirillales(100)	Acetobacteraceae(100)	Acetobacteraceae_unclassified(100)	0	0	0	0	0	0	0	0	0	0	0	1	0	0	0	0	0	0	0	0	0	0	0	0	2	0	0	0	0	0	0	0	0	0	0	0	0	0	65	0	12	0	0
Otu01273	Bacteria(100)	Actinobacteria(100)	Actinobacteria(100)	Actinobacteria_unclassified(88)	Actinobacteria_unclassified(88)	Actinobacteria_unclassified(88)	0	0	0	0	0	0	0	13	0	0	0	0	0	0	0	0	0	0	7	3	0	9	2	3	1	0	0	0	0	0	0	0	0	0	0	0	0	0	13	0	0	0	0
Otu01289	Bacteria(100)	Firmicutes(100)	Clostridia(100)	Clostridiales(100)	Clostridiales_Incertae_Sedis_XI(100)	Anaerococcus(100)	0	0	0	0	0	0	0	0	0	0	0	0	0	42	0	0	0	0	0	0	0	0	0	0	0	0	0	0	0	0	0	0	0	0	0	0	0	0	0	0	0	0	0
Otu01301	Bacteria(100)	Planctomycetes(100)	Planctomycetacia(100)	Planctomycetales(100)	Planctomycetaceae(100)	Singulisphaera(100)	0	0	0	0	0	0	0	0	0	0	0	0	0	0	0	0	0	0	0	0	0	0	0	0	0	0	0	0	0	0	0	0	0	0	0	0	0	0	111	0	112	0	0
Otu01302	Bacteria(100)	Proteobacteria(100)	Alphaproteobacteria(100)	Rhizobiales(100)	Rhizobiales_unclassified(92)	Rhizobiales_unclassified(92)	0	0	0	0	0	0	0	0	0	0	0	0	0	0	0	0	0	0	0	0	0	0	2	0	0	0	0	0	0	0	0	0	0	0	0	0	0	0	0	0	183	0	0
Otu01304	Bacteria(100)	Firmicutes(100)	Clostridia(100)	Clostridiales(100)	Lachnospiraceae(100)	Anaerostipes(100)	0	0	0	0	0	0	0	0	0	0	0	0	0	48	0	0	0	0	0	0	0	0	0	0	0	2	0	0	0	0	0	0	0	0	0	0	0	0	0	0	0	0	0
Otu01305	Bacteria(100)	Bacteria_unclassified(100)	Bacteria_unclassified(100)	Bacteria_unclassified(100)	Bacteria_unclassified(100)	Bacteria_unclassified(100)	0	0	0	0	0	0	0	0	0	0	0	0	0	0	0	0	0	0	0	0	0	0	0	0	0	0	0	0	0	0	0	0	0	0	0	0	0	0	0	0	0	0	0
Otu01308	Bacteria(100)	Planctomycetes(100)	Planctomycetacia(100)	Planctomycetales(100)	Planctomycetaceae(100)	Planctomycetaceae_unclassified(100)	0	0	0	0	0	0	0	0	0	0	0	0	0	0	0	0	0	0	0	0	0	0	0	0	0	0	0	0	0	0	0	0	0	0	0	0	0	10	125	12	24	0	0
Otu01309	Bacteria(100)	Actinobacteria(100)	Actinobacteria(100)	Coriobacteriales(100)	Coriobacteriaceae(100)	Olsenella(100)	0	0	0	0	0	0	0	0	0	0	0	0	0	0	0	0	0	0	0	0	0	0	0	0	0	0	0	0	0	0	0	0	0	0	0	0	0	0	0	0	0	0	0
Otu01310	Bacteria(100)	Bacteria_unclassified(100)	Bacteria_unclassified(100)	Bacteria_unclassified(100)	Bacteria_unclassified(100)	Bacteria_unclassified(100)	0	0	0	0	0	0	0	0	0	0	0	0	0	0	0	0	0	0	0	0	0	0	0	0	0	0	0	0	0	0	0	0	0	0	0	0	0	0	0	0	0	0	0
Otu01151	Bacteria(100)	Proteobacteria(100)	Alphaproteobacteria(100)	Rhizobiales(100)	Rhizobiales_unclassified(65)	Rhizobiales_unclassified(65)	0	0	2	0	0	0	4	0	0	9	0	0	0	0	0	0	0	0	0	0	0	0	0	0	0	0	0	0	0	0	0	0	0	0	0	0	0	65	29	0	0	0	53
Otu01306	Bacteria(100)	Acidobacteria(100)	Acidobacteria_Gp6(100)	Acidobacteria_Gp6_order_incertae_sedis(100)	Acidobacteria_Gp6_family_incertae_sedis(100)	Gp6(100)	0	0	0	0	0	0	0	0	0	0	0	0	0	5	0	0	0	0	0	0	0	0	0	0	0	0	0	0	0	0	0	0	0	0	0	0	0	0	0	0	0	0	0
Otu01307	Bacteria(100)	Planctomycetes(51)	Planctomycetacia(51)	Planctomycetales(51)	Planctomycetaceae(51)	Planctomycetaceae_unclassified(51)	0	0	0	3	0	0	0	4	0	0	0	0	0	0	0	4	0	1	0	0	0	8	6	0	0	0	0	0	0	0	0	0	0	0	0	0	0	60	4	0	0	0	0
Otu01311	Bacteria(100)	Planctomycetes(100)	Planctomycetacia(100)	Planctomycetales(100)	Planctomycetaceae(100)	Singulisphaera(100)	0	0	0	0	0	0	0	0	0	0	0	0	0	0	0	0	0	0	0	0	3	6	0	0	0	0	0	0	0	0	0	0	0	0	0	0	0	5	77	0	24	0	0
Otu01312	Bacteria(100)	Firmicutes(100)	Firmicutes_unclassified(99)	Firmicutes_unclassified(99)	Firmicutes_unclassified(99)	Firmicutes_unclassified(99)	0	0	0	0	0	0	0	0	0	0	0	0	0	0	0	0	0	0	0	0	0	0	0	0	0	0	0	0	0	0	0	0	0	0	0	0	0	0	0	0	0	0	0
Otu01313	Bacteria(100)	Firmicutes(100)	Clostridia(100)	Clostridiales(100)	Clostridiaceae_1(100)	Clostridium_sensu_stricto(100)	0	0	0	0	0	0	0	0	222	0	0	0	0	0	0	0	0	0	0	0	0	0	0	0	0	0	0	0	0	0	0	0	0	0	0	0	0	0	0	0	0	0	0
Otu01314	Bacteria(100)	Bacteria_unclassified(100)	Bacteria_unclassified(100)	Bacteria_unclassified(100)	Bacteria_unclassified(100)	Bacteria_unclassified(100)	0	0	0	0	0	0	0	0	0	0	0	0	0	0	0	0	0	0	0	0	0	0	0	0	0	0	0	0	0	0	0	0	0	0	0	0	0	220	0	0	0	0	0
Otu01315	Bacteria(100)	Bacteroidetes(100)	Bacteroidetes_unclassified(100)	Bacteroidetes_unclassified(100)	Bacteroidetes_unclassified(100)	Bacteroidetes_unclassified(100)	0	0	0	0	0	0	0	0	0	0	0	0	0	0	0	0	0	0	0	0	0	0	0	0	0	0	0	0	0	0	0	0	0	0	0	0	0	0	0	0	0	0	0
Otu01316	Bacteria(100)	Planctomycetes(93)	Planctomycetacia(93)	Planctomycetales(93)	Planctomycetaceae(93)	Planctomycetaceae_unclassified(93)	0	0	0	0	0	0	0	0	0	0	0	0	0	0	0	0	0	0	0	0	0	0	0	0	0	0	0	0	0	0	0	0	0	0	0	0	0	0	0	0	0	0	0
Otu01083	Bacteria(100)	Proteobacteria(100)	Gammaproteobacteria(100)	Pseudomonadales(100)	Pseudomonadaceae(100)	Pseudomonas(100)	3	0	0	0	0	0	0	0	0	0	0	0	0	0	0	0	0	0	0	0	0	0	0	0	0	0	0	0	0	0	0	0	0	0	0	0	0	0	0	0	0	0	0
Otu01319	Bacteria(100)	Firmicutes(100)	Clostridia(100)	Clostridiales(100)	Lachnospiraceae(100)	Lachnospiraceae_unclassified(98)	0	0	0	0	0	0	0	0	0	0	0	0	0	0	0	10	14	0	9	0	0	0	0	0	0	0	0	0	0	0	0	0	0	0	0	0	0	0	0	0	0	0	0
Otu01320	Bacteria(100)	Firmicutes(100)	Clostridia(100)	Clostridiales(100)	Ruminococcaceae(100)	Ruminococcaceae_unclassified(100)	0	0	0	0	0	0	0	0	0	0	0	0	0	0	0	0	0	0	0	0	0	0	0	0	0	0	0	0	0	0	0	0	0	0	0	0	0	0	0	0	0	0	0
Otu01300	Bacteria(100)	Proteobacteria(100)	Alphaproteobacteria(100)	Rhizobiales(100)	Methylobacteriaceae(100)	Methylobacterium(100)	0	0	0	0	0	0	0	0	0	0	0	23	0	0	0	0	0	0	0	0	0	0	0	0	0	2	0	0	0	0	0	0	0	0	0	0	70	0	0	0	6	0	0
Otu01318	Bacteria(100)	Verrucomicrobia(100)	Verrucomicrobiae(100)	Verrucomicrobiales(100)	Verrucomicrobiaceae(100)	Verrucomicrobiaceae_unclassified(100)	0	0	0	0	0	0	2	0	0	0	0	0	0	0	0	0	0	0	0	0	0	0	0	0	0	0	0	0	0	0	0	0	0	0	0	0	0	0	2	0	0	0	0
Otu01321	Bacteria(100)	Bacteria_unclassified(100)	Bacteria_unclassified(100)	Bacteria_unclassified(100)	Bacteria_unclassified(100)	Bacteria_unclassified(100)	0	0	0	0	0	0	0	0	0	0	0	0	0	0	0	0	0	0	0	0	0	0	0	0	0	0	0	0	0	0	0	0	0	0	0	0	0	0	0	0	0	0	0
Otu01323	Bacteria(100)	Actinobacteria(100)	Actinobacteria(100)	Actinomycetales(100)	Nocardioidaceae(100)	Nocardioides(100)	0	0	0	0	0	0	0	0	0	0	0	0	0	0	0	0	0	0	0	0	0	0	0	0	0	0	0	0	0	0	0	0	0	0	0	0	0	0	0	0	0	0	0
Otu01324	Bacteria(100)	Proteobacteria(100)	Alphaproteobacteria(100)	Rhizobiales(100)	Rhizobiales_unclassified(100)	Rhizobiales_unclassified(100)	0	0	0	0	4	0	0	0	0	0	0	0	0	0	0	0	0	0	0	0	0	0	0	0	0	0	0	0	0	0	0	0	0	0	0	0	0	0	0	0	0	0	0
Otu01325	Bacteria(100)	Proteobacteria(100)	Alphaproteobacteria(100)	Sphingomonadales(100)	Sphingomonadaceae(100)	Sphingomonadaceae_unclassified(86)	0	0	0	0	0	0	0	0	0	0	0	0	0	0	0	0	0	0	0	0	0	0	0	0	4	0	0	0	0	0	0	0	0	0	0	0	0	1	0	0	3	0	0
Otu01326	Bacteria(100)	Firmicutes(100)	Clostridia(100)	Clostridiales(100)	Clostridiales_Incertae_Sedis_XIII(100)	Mogibacterium(100)	0	0	0	0	0	0	0	0	0	0	0	0	0	0	0	0	0	0	0	0	0	0	0	0	0	0	0	0	0	0	0	0	0	0	0	0	0	0	0	0	0	0	0
Otu01327	Bacteria(100)	Bacteria_unclassified(100)	Bacteria_unclassified(100)	Bacteria_unclassified(100)	Bacteria_unclassified(100)	Bacteria_unclassified(100)	0	0	0	0	0	0	0	0	0	0	0	0	0	0	0	0	0	0	0	0	0	0	0	0	0	0	0	0	0	0	0	0	0	0	0	0	0	147	0	0	0	0	0
Otu01328	Bacteria(100)	Firmicutes(100)	Clostridia(100)	Clostridiales(100)	Ruminococcaceae(100)	Ruminococcaceae_unclassified(100)	0	0	0	0	0	0	0	0	0	0	0	0	0	0	0	0	0	0	0	0	0	0	0	0	0	0	0	0	0	0	0	0	0	0	0	0	0	0	0	0	0	211	0
Otu01330	Bacteria(100)	Bacteria_unclassified(100)	Bacteria_unclassified(100)	Bacteria_unclassified(100)	Bacteria_unclassified(100)	Bacteria_unclassified(100)	0	0	0	0	0	0	0	0	0	0	0	0	0	0	0	0	0	0	0	0	0	0	0	0	0	0	0	0	0	0	0	0	0	0	0	0	0	0	0	0	0	0	0
Otu01331	Bacteria(100)	Proteobacteria(100)	Deltaproteobacteria(100)	Myxococcales(100)	Myxococcales_unclassified(98)	Myxococcales_unclassified(98)	0	0	0	0	0	0	0	0	0	0	0	0	0	0	0	0	0	0	0	0	0	2	0	0	0	0	0	0	0	0	0	0	0	0	0	0	0	5	0	0	0	0	0
Otu01322	Bacteria(100)	Proteobacteria(100)	Alphaproteobacteria(100)	Rhizobiales(100)	Aurantimonadaceae(82)	Aurantimonas(82)	0	0	0	0	0	0	0	0	0	0	0	0	0	21	0	0	0	0	0	0	0	0	0	0	0	0	0	0	0	0	0	0	0	0	0	0	0	0	0	0	0	0	0
Otu01332	Bacteria(100)	Proteobacteria(100)	Gammaproteobacteria(98)	Gammaproteobacteria_unclassified(98)	Gammaproteobacteria_unclassified(98)	Gammaproteobacteria_unclassified(98)	0	15	0	0	0	0	0	0	0	0	0	0	0	4	0	0	0	0	0	0	0	0	0	0	0	0	0	0	0	0	0	0	0	0	0	0	0	0	0	0	0	0	0
Otu01333	Bacteria(100)	Firmicutes(100)	Bacilli(100)	Bacillales(100)	Bacillales_Incertae_Sedis_XII(100)	Exiguobacterium(100)	0	0	0	0	0	0	4	0	0	0	0	0	0	0	0	0	0	0	0	0	0	0	0	0	0	0	0	0	0	0	0	0	0	0	0	0	0	0	0	0	0	0	0
Otu01334	Bacteria(100)	Verrucomicrobia(100)	Subdivision3(100)	Subdivision3_order_incertae_sedis(100)	Subdivision3_family_incertae_sedis(100)	3_genus_incertae_sedis(100)	0	0	0	0	0	0	0	0	0	0	0	0	0	0	0	0	0	0	0	0	0	0	0	0	0	0	0	0	0	0	0	0	0	0	0	0	0	0	0	0	0	0	0
Otu01335	Bacteria(100)	Bacteria_unclassified(100)	Bacteria_unclassified(100)	Bacteria_unclassified(100)	Bacteria_unclassified(100)	Bacteria_unclassified(100)	0	0	0	0	0	0	0	0	0	0	0	0	0	0	0	0	0	0	0	0	0	0	0	0	0	0	0	0	0	0	0	0	0	0	0	0	0	0	0	0	0	0	0
Otu01336	Bacteria(100)	Actinobacteria(100)	Actinobacteria(100)	Actinomycetales(100)	Actinomycetales_unclassified(100)	Actinomycetales_unclassified(100)	0	0	0	0	0	0	0	0	0	0	0	0	0	0	0	0	0	0	0	1	1	4	3	0	0	0	0	0	0	0	0	0	0	0	0	0	179	0	0	0	0	0	0
Otu01329	Bacteria(100)	Firmicutes(100)	Bacilli(100)	Bacillales(100)	Paenibacillaceae_1(100)	Paenibacillus(100)	0	0	0	0	0	0	0	0	0	0	0	0	0	0	0	0	0	0	0	0	4	1	0	0	0	0	0	0	0	0	0	10	0	0	0	0	0	0	0	0	0	0	0
Otu01337	Bacteria(100)	Planctomycetes(100)	Planctomycetacia(100)	Planctomycetales(100)	Planctomycetaceae(100)	Singulisphaera(65)	0	0	0	0	0	0	0	0	0	0	0	0	0	0	0	0	0	0	0	0	0	0	0	0	0	0	0	0	0	0	0	0	0	0	0	0	0	42	22	0	72	0	0
Otu01340	Bacteria(100)	Actinobacteria(100)	Actinobacteria(100)	Actinomycetales(100)	Corynebacteriaceae(100)	Corynebacterium(100)	0	0	0	0	0	0	0	15	0	0	0	0	0	0	0	0	0	0	0	0	0	0	0	0	0	0	0	0	0	0	0	0	0	0	0	0	0	6	0	0	64	0	87
Otu01341	Bacteria(100)	Proteobacteria(100)	Epsilonproteobacteria(100)	Campylobacterales(100)	Helicobacteraceae(100)	Helicobacter(100)	0	0	0	0	0	0	0	0	0	0	0	0	0	0	0	0	0	0	0	0	0	0	0	0	0	0	0	0	0	0	0	0	0	0	0	0	0	0	0	0	0	0	0
Otu01345	Bacteria(100)	Planctomycetes(100)	Planctomycetacia(100)	Planctomycetales(100)	Planctomycetaceae(100)	Planctomycetaceae_unclassified(100)	0	0	0	0	0	0	0	0	0	0	0	0	0	0	0	0	0	0	0	0	0	0	0	0	0	0	0	0	0	0	0	0	0	0	0	0	0	72	68	0	19	0	0
Otu01342	Bacteria(100)	Acidobacteria(100)	Acidobacteria_Gp6(100)	Acidobacteria_Gp6_order_incertae_sedis(100)	Acidobacteria_Gp6_family_incertae_sedis(100)	Gp6(100)	0	0	0	0	0	0	0	0	0	0	0	0	0	0	0	0	0	0	0	0	0	0	0	0	0	0	0	0	0	0	0	0	0	0	0	0	0	0	0	0	13	0	0
Otu01343	Bacteria(100)	Proteobacteria(88)	Proteobacteria_unclassified(75)	Proteobacteria_unclassified(75)	Proteobacteria_unclassified(75)	Proteobacteria_unclassified(75)	0	0	0	0	0	0	0	0	0	0	0	0	0	0	0	0	0	0	2	0	0	0	0	0	1	0	0	0	0	0	0	0	0	0	0	0	0	0	7	0	9	0	0
Otu01346	Bacteria(100)	Bacteroidetes(100)	Sphingobacteria(100)	Sphingobacteriales(100)	Sphingobacteriaceae(100)	Mucilaginibacter(98)	0	0	0	0	0	0	0	0	0	0	0	0	0	0	0	0	0	0	0	0	0	0	0	0	1	0	0	0	0	0	0	0	0	0	0	0	0	0	0	0	0	0	0
Otu01344	Bacteria(100)	Firmicutes(100)	Bacilli(100)	Bacillales(100)	Bacillales_Incertae_Sedis_XI(100)	Gemella(100)	0	0	0	0	0	0	0	0	0	0	0	0	0	0	0	1	0	0	0	0	0	0	0	0	0	0	0	0	0	0	0	0	0	0	0	0	0	0	0	0	10	0	3
Otu01349	Bacteria(100)	Bacteroidetes(100)	Bacteroidetes_unclassified(100)	Bacteroidetes_unclassified(100)	Bacteroidetes_unclassified(100)	Bacteroidetes_unclassified(100)	0	0	0	0	0	0	0	0	0	0	0	0	0	0	0	0	0	0	0	0	0	0	0	0	0	0	0	0	0	0	0	0	0	0	0	0	0	0	0	0	0	0	0
Otu01350	Bacteria(100)	Bacteria_unclassified(100)	Bacteria_unclassified(100)	Bacteria_unclassified(100)	Bacteria_unclassified(100)	Bacteria_unclassified(100)	0	0	0	0	0	0	0	0	0	0	0	0	0	0	0	0	0	0	0	0	0	0	0	0	1	0	0	0	0	0	0	0	0	0	0	0	0	0	0	0	0	0	0
Otu01351	Bacteria(100)	Actinobacteria(100)	Actinobacteria(100)	Acidimicrobiales(100)	Acidimicrobiales_unclassified(100)	Acidimicrobiales_unclassified(100)	0	0	0	0	0	0	0	0	0	0	0	0	0	0	0	1	0	0	0	7	4	18	2	0	0	0	0	0	0	0	0	2	0	0	0	4	10	0	40	0	5	0	0
Otu01352	Bacteria(100)	Firmicutes(100)	Bacilli(100)	Lactobacillales(100)	Lactobacillaceae(100)	Lactobacillus(92)	0	0	0	0	0	0	0	0	0	0	0	0	0	203	0	0	0	0	0	0	0	0	0	0	0	0	0	0	0	0	0	0	0	0	0	0	0	0	0	0	2	0	0
Otu01353	Bacteria(100)	Bacteroidetes(100)	Bacteroidia(100)	Bacteroidales(100)	Porphyromonadaceae(100)	Dysgonomonas(100)	0	0	0	0	0	0	3	0	47	0	0	0	0	0	0	0	0	0	0	0	0	0	0	0	0	0	0	0	0	0	0	0	0	0	0	0	0	0	0	0	0	0	0
Otu01115	Bacteria(100)	Proteobacteria(100)	Alphaproteobacteria(100)	Rhizobiales(100)	Methylobacteriaceae(100)	Methylobacterium(100)	0	17	0	0	0	0	4	0	0	0	0	17	0	0	0	0	0	0	0	0	0	0	0	0	0	0	0	0	0	0	0	0	0	0	0	0	0	0	0	0	0	0	0
Otu01355	Bacteria(100)	Actinobacteria(100)	Actinobacteria(100)	Acidimicrobiales(85)	Acidimicrobiales_unclassified(85)	Acidimicrobiales_unclassified(85)	0	0	0	0	0	0	0	0	0	0	0	0	0	0	0	0	2	0	0	0	2	1	0	0	1	0	0	0	0	0	3	0	0	0	0	0	1	0	0	0	0	0	9
Otu01356	Bacteria(100)	Firmicutes(100)	Clostridia(100)	Clostridiales(100)	Clostridiales_Incertae_Sedis_XI(100)	Parvimonas(100)	0	0	0	0	0	0	0	0	0	0	0	0	0	0	0	0	0	0	0	0	0	0	0	0	0	0	0	0	0	0	0	0	0	0	0	0	0	0	0	0	0	0	0
Otu01357	Bacteria(100)	Bacteria_unclassified(100)	Bacteria_unclassified(100)	Bacteria_unclassified(100)	Bacteria_unclassified(100)	Bacteria_unclassified(100)	0	0	0	0	0	0	0	0	0	0	0	0	0	0	0	0	0	0	0	0	0	0	0	0	0	0	0	0	0	0	0	0	0	0	0	0	0	0	0	0	0	0	0
Otu01358	Bacteria(100)	Planctomycetes(100)	Planctomycetacia(100)	Planctomycetales(100)	Planctomycetaceae(100)	Planctomycetaceae_unclassified(100)	0	0	0	0	0	0	0	0	0	0	0	0	0	0	0	0	0	0	0	0	0	0	0	0	0	0	0	0	0	0	0	0	0	0	0	0	0	159	52	0	0	0	0
Otu01359	Bacteria(100)	Chloroflexi(100)	Chloroflexi_unclassified(95)	Chloroflexi_unclassified(95)	Chloroflexi_unclassified(95)	Chloroflexi_unclassified(95)	0	0	0	0	0	0	0	0	199	0	0	0	0	0	0	0	0	0	0	0	0	0	0	0	0	0	0	0	0	0	0	0	0	0	0	0	0	0	0	0	0	0	0
Otu01361	Bacteria(100)	Proteobacteria(100)	Alphaproteobacteria(100)	Rhodospirillales(98)	Rhodospirillales_unclassified(98)	Rhodospirillales_unclassified(98)	0	0	0	0	0	0	0	0	0	0	0	0	0	0	0	0	0	0	0	0	0	0	0	0	6	0	0	0	0	0	0	0	0	0	0	0	0	0	0	0	0	0	0
Otu01362	Bacteria(100)	Bacteroidetes(100)	Flavobacteria(100)	Flavobacteriales(100)	Flavobacteriaceae(100)	Flavobacterium(100)	0	0	0	0	0	0	0	0	0	0	0	0	0	0	0	0	0	0	0	0	0	0	0	0	2	0	0	0	0	0	0	0	0	0	0	1	0	0	0	0	19	0	0
Otu01363	Bacteria(100)	Actinobacteria(100)	Actinobacteria(100)	Solirubrobacterales(74)	Conexibacteraceae(53)	Conexibacter(53)	0	0	0	1	0	0	0	3	0	0	0	0	0	0	0	7	6	1	0	0	2	5	0	0	0	0	0	0	0	0	0	0	0	0	0	0	0	0	0	0	0	0	0
Otu01354	Bacteria(100)	Proteobacteria(100)	Betaproteobacteria(100)	Burkholderiales(100)	Burkholderiales_incertae_sedis(81)	Burkholderiales_incertae_sedis_unclassified(54)	0	1	0	0	0	70	3	0	0	0	0	0	0	2	0	0	0	0	0	0	0	0	0	0	0	0	0	0	0	0	0	0	0	0	0	0	0	0	5	0	0	0	0
Otu01360	Bacteria(100)	Firmicutes(84)	Clostridia(84)	Clostridiales(84)	Ruminococcaceae(84)	Ruminococcaceae_unclassified(84)	0	0	0	0	0	0	0	0	0	0	0	0	0	0	0	0	0	0	0	0	0	0	0	0	1	0	0	0	0	0	0	0	0	0	0	0	58	0	0	0	0	0	0
Otu01364	Bacteria(100)	Firmicutes(100)	Clostridia(100)	Clostridiales(100)	Lachnospiraceae(100)	Lachnospiraceae_unclassified(100)	0	5	0	0	0	0	0	0	0	0	0	0	0	0	0	1	0	0	0	0	0	0	0	0	0	0	0	0	0	0	0	0	0	0	0	0	111	0	0	0	0	0	0
Otu01365	Bacteria(100)	Proteobacteria(100)	Alphaproteobacteria(100)	Caulobacterales(99)	Caulobacteraceae(99)	Phenylobacterium(99)	0	0	0	0	0	0	0	0	0	0	0	0	0	0	0	0	0	0	0	0	0	0	0	0	0	0	0	0	0	0	0	0	0	0	0	0	0	2	0	0	11	0	45
Otu01366	Bacteria(100)	Proteobacteria(100)	Gammaproteobacteria(100)	Legionellales(100)	Legionellaceae(100)	Legionella(100)	0	0	0	0	0	0	0	0	0	0	0	0	0	0	0	0	0	0	0	0	0	0	0	0	0	0	0	0	0	0	0	0	0	0	0	0	0	0	0	0	0	0	0
Otu01367	Bacteria(100)	Firmicutes(100)	Clostridia(100)	Clostridiales(100)	Clostridiales_Incertae_Sedis_XIII(100)	Mogibacterium(100)	0	0	0	0	0	0	0	0	0	0	0	0	0	0	0	0	0	0	0	0	0	0	0	0	0	0	0	0	0	0	0	0	0	0	0	0	0	0	0	0	0	0	0
Otu01368	Bacteria(100)	Proteobacteria(100)	Alphaproteobacteria(100)	Sphingomonadales(100)	Sphingomonadaceae(88)	Novosphingobium(87)	0	3	0	0	0	0	0	0	0	0	0	0	0	2	0	0	0	0	0	0	0	0	0	0	0	0	0	0	0	0	0	0	0	0	0	0	0	126	0	0	32	0	0
Otu01369	Bacteria(100)	Bacteria_unclassified(100)	Bacteria_unclassified(100)	Bacteria_unclassified(100)	Bacteria_unclassified(100)	Bacteria_unclassified(100)	0	0	0	0	0	0	0	0	0	0	0	0	0	0	0	0	0	0	0	0	0	0	0	0	0	0	0	0	0	0	0	0	0	0	0	0	0	0	0	0	0	0	0
Otu01347	Bacteria(100)	Proteobacteria(100)	Betaproteobacteria(100)	Burkholderiales(100)	Comamonadaceae(100)	Schlegelella(100)	0	0	0	0	0	0	0	0	0	0	0	0	0	0	0	0	0	0	0	0	0	0	0	0	0	0	0	0	0	0	0	0	0	0	0	0	0	0	0	0	0	0	0
Otu01348	Bacteria(100)	Bacteria_unclassified(100)	Bacteria_unclassified(100)	Bacteria_unclassified(100)	Bacteria_unclassified(100)	Bacteria_unclassified(100)	0	0	0	0	0	0	0	0	0	0	0	0	0	2	0	1	0	0	0	0	0	0	0	0	2	0	0	0	0	0	0	0	0	0	0	0	0	0	0	0	0	0	0
Otu01371	Bacteria(100)	Planctomycetes(100)	Planctomycetacia(100)	Planctomycetales(100)	Planctomycetaceae(100)	Planctomyces(100)	0	0	0	0	0	0	0	0	0	0	0	0	0	0	0	0	0	0	0	0	0	0	0	0	0	0	0	0	0	0	0	0	0	0	0	0	0	0	0	0	0	0	0
Otu01164	Bacteria(100)	Firmicutes(100)	Clostridia(100)	Clostridiales(100)	Ruminococcaceae(100)	Ruminococcaceae_unclassified(100)	0	33	3	0	0	15	0	0	0	0	0	0	0	0	0	0	0	0	0	0	4	1	0	0	0	0	0	0	0	0	0	0	0	0	0	0	0	0	0	0	0	0	0
Otu01372	Bacteria(100)	Chloroflexi(100)	Ktedonobacteria(100)	Ktedonobacterales(100)	Ktedonobacteraceae(100)	Ktedonobacter(100)	0	4	0	0	0	3	0	0	0	0	0	0	0	0	0	0	0	0	0	0	0	3	0	0	0	0	0	0	0	0	0	0	0	0	0	0	0	73	30	0	54	0	0
Otu01373	Bacteria(100)	Bacteroidetes(100)	Flavobacteria(100)	Flavobacteriales(100)	Flavobacteriaceae(100)	Flavobacterium(100)	0	0	0	0	0	0	0	0	0	0	0	0	0	0	2	0	0	0	0	0	0	0	0	0	0	0	0	0	0	0	0	0	0	0	0	0	0	0	0	0	0	0	0
Otu01374	Bacteria(100)	Chlamydiae(100)	Chlamydiae(100)	Chlamydiales(100)	Parachlamydiaceae(100)	Parachlamydia(100)	0	0	0	0	0	0	0	0	0	0	0	0	0	0	0	0	0	0	0	0	0	0	0	0	0	0	0	0	0	0	0	0	0	0	0	0	0	0	0	0	0	0	0
Otu01375	Bacteria(100)	Bacteria_unclassified(100)	Bacteria_unclassified(100)	Bacteria_unclassified(100)	Bacteria_unclassified(100)	Bacteria_unclassified(100)	0	0	0	0	0	0	0	0	0	0	0	0	0	0	0	0	0	0	0	0	0	0	0	0	0	0	0	0	0	0	0	0	0	0	0	0	0	0	0	0	0	0	0
Otu01376	Bacteria(100)	Firmicutes(100)	Firmicutes_unclassified(100)	Firmicutes_unclassified(100)	Firmicutes_unclassified(100)	Firmicutes_unclassified(100)	0	0	0	0	0	0	0	0	0	0	0	0	0	0	0	0	0	0	0	0	0	0	0	0	0	0	0	0	0	0	0	0	0	0	0	0	0	0	0	0	0	0	0
Otu01377	Bacteria(100)	Bacteroidetes(100)	Sphingobacteria(100)	Sphingobacteriales(100)	Sphingobacteriaceae(100)	Mucilaginibacter(64)	0	0	0	0	0	0	0	0	0	0	0	0	0	0	0	0	0	0	0	0	0	4	0	0	0	0	0	0	0	0	0	0	0	0	0	0	0	9	0	0	34	0	2
Otu01378	Bacteria(100)	Firmicutes(100)	Clostridia(100)	Clostridiales(100)	Peptostreptococcaceae(100)	Clostridium_XI(100)	2	78	28	0	0	0	7	0	0	0	0	0	0	0	0	0	0	0	0	0	0	0	0	0	0	0	0	0	0	0	0	0	0	0	0	0	0	0	0	0	0	0	0
Otu01379	Bacteria(100)	Acidobacteria(100)	Acidobacteria_Gp1(100)	Acidobacteria_Gp1_order_incertae_sedis(100)	Acidobacteria_Gp1_family_incertae_sedis(100)	Gp1(100)	0	0	0	0	0	0	0	0	0	0	0	0	0	0	0	0	0	0	0	0	0	0	0	0	0	0	0	0	0	0	0	0	0	0	0	0	0	0	0	0	0	0	0
Otu01381	Bacteria(100)	Verrucomicrobia(100)	Spartobacteria(100)	Spartobacteria_order_incertae_sedis(100)	Spartobacteria_family_incertae_sedis(100)	Spartobacteria_genera_incertae_sedis(100)	0	0	0	0	0	0	0	0	0	0	0	0	0	4	0	0	0	0	0	0	0	0	0	0	0	0	83	0	0	0	0	0	0	0	0	0	0	0	0	0	0	0	0
Otu01382	Bacteria(100)	Bacteroidetes(100)	Bacteroidetes_unclassified(59)	Bacteroidetes_unclassified(59)	Bacteroidetes_unclassified(59)	Bacteroidetes_unclassified(59)	0	0	0	0	0	0	0	0	0	0	0	0	0	0	0	0	0	0	0	0	0	0	0	0	0	0	0	0	0	0	0	0	0	0	0	0	0	9	65	0	0	0	0
Otu01384	Bacteria(100)	Proteobacteria(100)	Alphaproteobacteria(100)	Rhizobiales(100)	Rhizobiales_unclassified(100)	Rhizobiales_unclassified(100)	0	0	0	0	0	0	0	0	0	0	0	0	0	0	0	0	0	0	0	0	0	0	0	0	0	0	0	0	0	0	0	0	0	0	0	0	0	0	0	0	0	0	0
Otu01385	Bacteria(100)	Planctomycetes(100)	Planctomycetacia(100)	Planctomycetales(100)	Planctomycetaceae(100)	Planctomycetaceae_unclassified(100)	0	0	0	0	0	0	0	0	0	0	0	0	0	0	0	0	0	0	0	0	0	0	0	0	0	0	0	0	0	0	0	0	0	0	0	0	0	0	0	0	0	0	0
Otu01386	Bacteria(100)	Acidobacteria(100)	Acidobacteria_Gp3(100)	Acidobacteria_Gp3_order_incertae_sedis(100)	Acidobacteria_Gp3_family_incertae_sedis(100)	Gp3(100)	0	1	4	0	0	0	0	0	0	0	0	0	0	0	0	2	0	1	0	0	0	2	0	0	4	0	0	0	0	0	0	0	0	0	0	0	0	1	0	0	0	0	0
Otu01387	Bacteria(100)	Bacteria_unclassified(100)	Bacteria_unclassified(100)	Bacteria_unclassified(100)	Bacteria_unclassified(100)	Bacteria_unclassified(100)	0	0	0	0	0	0	0	0	0	0	0	0	0	2	0	0	0	0	0	0	0	0	0	0	0	0	0	0	0	0	0	0	0	0	0	0	0	0	0	0	0	0	0
Otu01388	Bacteria(100)	Firmicutes(100)	Bacilli(100)	Bacillales(100)	Bacillales_Incertae_Sedis_X(100)	Thermicanus(100)	0	0	0	0	0	0	0	0	0	0	0	0	0	24	0	0	0	0	0	0	0	0	0	0	0	0	70	0	0	0	0	0	0	0	0	0	0	0	0	0	0	0	0
Otu01389	Bacteria(100)	Proteobacteria(100)	Gammaproteobacteria(100)	Pasteurellales(100)	Pasteurellaceae(100)	Pasteurellaceae_unclassified(100)	0	0	0	0	0	0	0	0	0	0	0	0	0	0	0	0	0	0	0	0	0	0	0	0	0	0	0	0	0	0	0	0	0	0	0	0	0	0	0	0	13	0	0
Otu01390	Bacteria(100)	Bacteroidetes(100)	Sphingobacteria(100)	Sphingobacteriales(100)	Chitinophagaceae(77)	Chitinophagaceae_unclassified(77)	0	0	0	0	0	0	0	0	0	0	0	0	0	0	0	1	0	0	0	0	0	0	0	0	0	0	0	0	0	0	0	0	0	0	0	0	0	28	0	0	7	0	13
Otu01391	Bacteria(100)	Bacteroidetes(100)	Sphingobacteria(100)	Sphingobacteriales(100)	Sphingobacteriaceae(100)	Sphingobacteriaceae_unclassified(97)	0	0	0	0	0	0	0	0	0	0	0	0	0	0	0	0	0	0	0	0	0	0	0	0	0	0	0	0	0	0	0	0	0	0	0	0	0	0	0	0	2	0	195
Otu01392	Bacteria(100)	Planctomycetes(100)	Planctomycetacia(100)	Planctomycetales(100)	Planctomycetaceae(100)	Singulisphaera(99)	0	0	0	0	0	0	0	0	0	0	0	0	0	0	0	0	0	0	0	0	0	0	0	0	0	0	0	0	0	0	0	0	0	0	0	0	0	0	150	0	48	0	0
Otu01393	Bacteria(100)	Proteobacteria(100)	Gammaproteobacteria(100)	Xanthomonadales(100)	Xanthomonadaceae(100)	Xanthomonadaceae_unclassified(100)	0	0	0	0	0	0	0	0	0	0	0	0	0	0	0	0	0	0	0	0	0	0	0	0	0	0	0	0	0	0	0	0	0	0	0	0	0	127	3	0	0	0	0
Otu01161	Bacteria(100)	Planctomycetes(100)	Planctomycetacia(100)	Planctomycetales(100)	Planctomycetaceae(100)	Singulisphaera(100)	0	0	0	0	0	0	0	0	0	0	0	0	0	0	0	0	0	0	0	0	5	5	0	0	0	0	0	0	0	0	0	0	0	0	0	0	0	2	46	0	0	0	0
Otu01395	Bacteria(100)	Actinobacteria(100)	Actinobacteria(100)	Actinomycetales(100)	Brevibacteriaceae(100)	Brevibacterium(100)	0	0	0	0	0	0	1	0	0	0	4	0	0	0	0	0	0	0	0	4	0	0	0	0	0	0	0	0	0	0	0	0	0	0	0	0	0	0	0	0	0	0	0
Otu01397	Bacteria(100)	Proteobacteria(100)	Alphaproteobacteria(100)	Alphaproteobacteria_unclassified(100)	Alphaproteobacteria_unclassified(100)	Alphaproteobacteria_unclassified(100)	0	0	0	0	0	0	0	0	0	0	0	0	0	0	0	0	0	0	0	7	0	0	0	0	0	1	0	0	0	1	0	0	0	0	0	0	0	0	0	0	0	0	0
Otu01398	Bacteria(100)	Proteobacteria(100)	Gammaproteobacteria(100)	Legionellales(100)	Legionellaceae(100)	Legionella(100)	0	0	0	0	0	0	0	0	0	0	0	0	0	0	0	0	0	0	0	0	1	0	0	0	0	0	0	0	0	0	0	0	0	0	0	0	0	5	23	0	17	0	155
Otu01399	Bacteria(100)	Proteobacteria(100)	Gammaproteobacteria(100)	Pseudomonadales(100)	Pseudomonadaceae(100)	Cellvibrio(100)	0	31	0	0	1	0	0	0	0	0	0	0	0	0	0	0	0	0	1	0	0	0	0	0	0	0	0	0	0	0	0	0	0	0	0	0	0	10	56	0	0	0	4
Otu01400	Bacteria(100)	Proteobacteria(100)	Alphaproteobacteria(100)	Rhizobiales(100)	Methylobacteriaceae(100)	Methylobacterium(100)	0	0	0	0	0	0	0	0	0	0	0	0	0	0	0	0	0	0	0	0	0	0	0	0	0	0	0	0	0	0	0	0	0	0	0	0	0	0	0	0	0	0	0
Otu01402	Bacteria(100)	Planctomycetes(100)	Planctomycetacia(100)	Planctomycetales(100)	Planctomycetaceae(100)	Planctomycetaceae_unclassified(100)	0	0	0	0	0	0	0	0	0	0	0	0	0	0	0	1	0	0	0	0	0	0	0	0	0	0	0	0	0	0	0	0	0	0	0	0	0	0	0	0	0	0	0
Otu01403	Bacteria(100)	Proteobacteria(100)	Deltaproteobacteria(100)	Myxococcales(88)	Myxococcales_unclassified(88)	Myxococcales_unclassified(88)	0	4	0	0	0	19	0	0	0	0	0	0	0	0	0	0	0	0	0	0	0	0	0	0	0	0	0	0	0	0	0	0	0	0	0	0	0	0	0	0	0	0	14
Otu01405	Bacteria(100)	Firmicutes(100)	Clostridia(100)	Clostridiales(100)	Clostridiales_unclassified(98)	Clostridiales_unclassified(98)	0	0	0	0	0	0	0	0	0	0	0	0	0	0	0	0	0	0	0	0	0	0	0	0	0	0	5	0	0	0	0	0	0	0	0	0	0	0	0	0	0	0	0
Otu01406	Bacteria(100)	Firmicutes(100)	Clostridia(100)	Clostridiales(100)	Lachnospiraceae(100)	Dorea(100)	0	0	0	0	0	0	0	0	0	0	0	0	0	5	0	0	0	0	0	0	0	0	0	0	0	0	0	0	0	0	0	0	0	0	0	0	0	0	0	1	0	0	0
Otu01407	Bacteria(100)	Bacteroidetes(100)	Sphingobacteria(100)	Sphingobacteriales(100)	Sphingobacteriaceae(100)	Sphingobacteriaceae_unclassified(51)	0	3	0	0	0	0	0	0	0	0	0	0	0	0	0	0	0	0	0	0	0	0	0	0	0	0	0	0	0	0	0	0	0	0	0	0	0	0	0	0	22	0	33
Otu01408	Bacteria(100)	Planctomycetes(100)	Planctomycetacia(100)	Planctomycetales(100)	Planctomycetaceae(100)	Singulisphaera(99)	0	0	0	0	0	0	0	0	0	0	0	0	0	0	0	0	0	0	0	0	0	0	0	0	0	0	0	0	0	0	0	0	0	0	0	0	0	48	109	0	30	0	0
Otu01411	Bacteria(100)	Bacteria_unclassified(100)	Bacteria_unclassified(100)	Bacteria_unclassified(100)	Bacteria_unclassified(100)	Bacteria_unclassified(100)	0	0	0	0	0	0	0	0	16	0	0	0	0	0	0	0	0	0	0	0	0	0	0	0	0	0	0	0	0	0	0	0	0	0	0	0	0	0	0	0	0	0	0
Otu01412	Bacteria(100)	Verrucomicrobia(100)	Subdivision3(100)	Subdivision3_order_incertae_sedis(100)	Subdivision3_family_incertae_sedis(100)	3_genus_incertae_sedis(100)	0	0	0	0	0	0	0	0	0	0	0	0	0	0	192	0	0	0	0	0	0	0	0	0	0	0	0	0	0	0	0	0	0	0	0	0	0	0	0	0	0	0	0
Otu01413	Bacteria(100)	Bacteria_unclassified(100)	Bacteria_unclassified(100)	Bacteria_unclassified(100)	Bacteria_unclassified(100)	Bacteria_unclassified(100)	0	0	0	0	0	0	0	0	0	0	0	0	0	0	0	0	0	0	0	0	0	0	0	0	0	0	0	0	0	0	0	0	0	0	0	0	0	0	0	0	0	0	0
Otu01414	Bacteria(100)	Firmicutes(100)	Erysipelotrichia(100)	Erysipelotrichales(100)	Erysipelotrichaceae(100)	Erysipelotrichaceae_unclassified(100)	0	28	0	0	0	13	0	0	0	0	0	0	0	0	0	7	3	0	7	0	0	0	0	0	0	0	0	0	0	0	0	0	0	0	0	0	0	0	0	0	0	0	0
Otu01404	Bacteria(100)	Actinobacteria(100)	Actinobacteria(100)	Actinomycetales(100)	Catenulisporaceae(99)	Catenulispora(99)	0	0	0	0	0	0	0	0	0	0	0	0	0	0	0	3	0	0	0	0	1	3	1	0	0	0	0	0	0	0	0	0	0	0	0	0	0	0	5	0	9	0	0
Otu01415	Bacteria(100)	Bacteria_unclassified(100)	Bacteria_unclassified(100)	Bacteria_unclassified(100)	Bacteria_unclassified(100)	Bacteria_unclassified(100)	0	0	0	0	0	0	0	0	0	0	0	0	0	0	0	0	0	0	0	5	1	2	0	0	0	0	0	0	0	0	0	0	0	0	0	0	0	5	9	0	27	0	139
Otu01416	Bacteria(100)	Bacteria_unclassified(100)	Bacteria_unclassified(100)	Bacteria_unclassified(100)	Bacteria_unclassified(100)	Bacteria_unclassified(100)	0	0	0	0	0	0	0	0	0	0	0	0	0	0	0	0	0	0	0	0	0	0	0	0	0	0	0	0	0	0	0	0	0	0	0	0	0	0	70	0	0	0	0
Otu01394	Bacteria(100)	Bacteria_unclassified(100)	Bacteria_unclassified(100)	Bacteria_unclassified(100)	Bacteria_unclassified(100)	Bacteria_unclassified(100)	0	0	0	0	0	0	0	0	0	2	0	2	0	0	0	0	0	0	0	0	0	0	0	0	0	0	0	0	0	0	0	0	0	0	0	0	0	0	6	0	38	0	0
Otu01401	Bacteria(100)	Planctomycetes(100)	Planctomycetacia(100)	Planctomycetales(100)	Planctomycetaceae(100)	Singulisphaera(100)	0	0	0	0	0	0	0	0	0	0	0	0	0	0	0	0	0	0	0	0	0	0	0	0	0	0	0	0	0	0	0	0	0	0	0	0	0	2	0	0	86	0	0
Otu01410	Bacteria(100)	Actinobacteria(100)	Actinobacteria(100)	Actinomycetales(100)	Geodermatophilaceae(100)	Geodermatophilus(100)	0	15	0	0	9	53	0	0	0	0	0	0	0	0	0	0	0	0	0	0	0	0	1	0	0	0	0	0	0	0	0	0	0	0	0	0	0	0	0	0	8	0	0
Otu01418	Bacteria(100)	Proteobacteria(100)	Alphaproteobacteria(100)	Rhodospirillales(100)	Acetobacteraceae(100)	Acetobacteraceae_unclassified(100)	0	0	0	0	0	0	0	0	0	0	0	0	0	0	0	0	0	0	0	0	0	0	0	0	0	0	0	0	0	0	0	0	0	0	0	0	0	65	20	0	5	0	96
Otu01419	Bacteria(100)	Bacteroidetes(100)	Sphingobacteria(100)	Sphingobacteriales(100)	Chitinophagaceae(100)	Chitinophagaceae_unclassified(60)	0	0	0	0	1	0	0	0	91	0	0	0	0	1	0	0	0	0	0	0	0	0	0	0	0	0	0	0	0	0	0	0	0	0	0	0	0	0	0	0	0	0	0
Otu01420	Bacteria(100)	Bacteroidetes(100)	Sphingobacteria(100)	Sphingobacteriales(100)	Cytophagaceae(100)	Hymenobacter(100)	0	0	12	0	0	0	0	0	0	0	0	0	0	0	0	0	0	0	0	0	0	0	0	0	0	0	0	0	0	0	0	0	0	0	0	0	0	88	0	0	15	0	0
Otu01421	Bacteria(100)	Bacteria_unclassified(100)	Bacteria_unclassified(100)	Bacteria_unclassified(100)	Bacteria_unclassified(100)	Bacteria_unclassified(100)	0	0	0	0	0	0	0	0	0	0	0	0	0	0	0	0	0	0	0	0	0	0	0	0	0	0	0	0	0	0	0	0	0	0	0	0	0	0	0	0	0	0	0
Otu01423	Bacteria(100)	Bacteroidetes(100)	Sphingobacteria(100)	Sphingobacteriales(100)	Saprospiraceae(86)	Haliscomenobacter(86)	0	0	0	0	0	0	0	0	0	0	0	0	0	0	0	0	0	0	0	0	0	0	0	0	0	0	0	0	0	0	0	0	0	0	0	0	0	0	0	0	29	0	80
Otu01424	Bacteria(100)	Proteobacteria(100)	Alphaproteobacteria(100)	Alphaproteobacteria_unclassified(100)	Alphaproteobacteria_unclassified(100)	Alphaproteobacteria_unclassified(100)	0	0	0	0	0	0	0	0	0	0	0	0	0	0	0	0	0	0	1	0	0	0	0	0	0	0	0	0	0	0	0	0	0	0	0	0	0	16	0	0	13	0	0
Otu01422	Bacteria(100)	Proteobacteria(100)	Gammaproteobacteria(100)	Legionellales(100)	Legionellaceae(100)	Legionella(100)	0	0	0	0	0	0	0	0	127	0	0	0	1	0	0	3	4	0	1	0	1	2	0	0	0	0	0	0	0	0	0	2	0	0	0	4	0	0	0	0	1	0	0
Otu01425	Bacteria(100)	Actinobacteria(100)	Actinobacteria(100)	Actinomycetales(100)	Actinomycetales_unclassified(100)	Actinomycetales_unclassified(100)	0	12	0	0	0	0	0	0	0	0	0	0	0	0	0	0	0	0	0	0	0	0	0	0	0	0	0	0	0	0	0	0	0	0	0	0	0	0	0	0	0	0	0
Otu01426	Bacteria(100)	Bacteria_unclassified(100)	Bacteria_unclassified(100)	Bacteria_unclassified(100)	Bacteria_unclassified(100)	Bacteria_unclassified(100)	0	0	0	0	0	0	0	0	0	0	0	0	0	0	0	0	0	0	0	0	0	0	0	0	0	0	0	0	0	0	0	0	0	0	0	0	0	9	0	0	0	0	0
Otu01427	Bacteria(100)	Bacteria_unclassified(100)	Bacteria_unclassified(100)	Bacteria_unclassified(100)	Bacteria_unclassified(100)	Bacteria_unclassified(100)	0	0	0	0	0	0	0	0	0	0	0	0	0	0	0	0	0	0	0	0	0	0	0	0	0	0	0	0	0	0	0	0	0	0	0	0	0	0	0	0	0	0	0
Otu01429	Bacteria(100)	Proteobacteria(100)	Gammaproteobacteria(100)	Pseudomonadales(100)	Moraxellaceae(100)	Psychrobacter(100)	0	0	2	0	0	0	0	0	2	0	23	0	0	0	0	0	0	0	0	0	0	0	1	0	0	0	3	0	0	0	0	0	0	0	0	0	0	0	0	0	0	0	0
Otu01430	Bacteria(100)	Bacteria_unclassified(100)	Bacteria_unclassified(100)	Bacteria_unclassified(100)	Bacteria_unclassified(100)	Bacteria_unclassified(100)	0	0	0	0	0	0	0	0	0	0	0	0	0	0	0	0	0	0	0	0	0	0	0	0	0	0	0	0	0	0	0	0	0	0	0	0	0	0	0	0	0	0	0
Otu01431	Bacteria(100)	Bacteria_unclassified(98)	Bacteria_unclassified(98)	Bacteria_unclassified(98)	Bacteria_unclassified(98)	Bacteria_unclassified(98)	0	0	0	0	0	0	0	0	0	0	0	0	0	0	0	0	0	0	0	0	0	0	0	0	0	2	0	0	0	0	0	0	0	0	0	0	0	0	0	0	0	0	0
Otu01432	Bacteria(100)	Bacteria_unclassified(100)	Bacteria_unclassified(100)	Bacteria_unclassified(100)	Bacteria_unclassified(100)	Bacteria_unclassified(100)	0	0	0	0	0	0	0	0	0	0	0	0	0	0	0	0	0	0	0	0	0	0	0	0	0	0	0	0	0	0	0	0	0	0	0	0	0	0	0	0	0	0	0
Otu01433	Bacteria(100)	Proteobacteria(100)	Gammaproteobacteria(100)	Gammaproteobacteria_unclassified(100)	Gammaproteobacteria_unclassified(100)	Gammaproteobacteria_unclassified(100)	0	0	0	0	0	0	0	0	0	0	0	0	0	0	0	0	0	0	0	0	0	0	8	0	0	0	0	0	0	0	0	0	0	0	0	0	0	0	0	0	0	0	0
Otu01434	Bacteria(100)	Bacteroidetes(100)	Bacteroidia(100)	Bacteroidales(100)	Bacteroidales_unclassified(100)	Bacteroidales_unclassified(100)	0	0	0	0	0	0	0	0	0	0	0	0	0	0	0	0	0	0	0	0	0	0	0	0	0	0	0	0	0	0	0	0	0	0	0	0	0	0	0	0	0	0	0
Otu01435	Bacteria(100)	Bacteria_unclassified(100)	Bacteria_unclassified(100)	Bacteria_unclassified(100)	Bacteria_unclassified(100)	Bacteria_unclassified(100)	0	0	0	0	0	0	0	0	0	0	0	0	0	0	0	0	0	0	0	0	0	0	0	0	0	0	0	0	0	0	0	0	0	0	0	0	0	0	0	0	0	0	0
Otu01437	Bacteria(100)	Firmicutes(100)	Erysipelotrichia(100)	Erysipelotrichales(100)	Erysipelotrichaceae(100)	Turicibacter(100)	0	0	0	0	0	0	0	0	0	0	0	0	0	0	0	0	0	0	0	0	0	0	0	0	0	0	0	0	0	0	0	0	0	0	0	0	0	0	0	0	0	0	0
Otu01438	Bacteria(100)	Chloroflexi(100)	Anaerolineae(100)	Anaerolineales(100)	Anaerolineaceae(100)	Anaerolineaceae_unclassified(100)	0	0	0	0	0	0	0	0	0	0	0	0	0	0	0	0	0	0	0	0	0	0	0	0	0	0	0	0	0	0	0	0	0	0	0	0	0	0	0	0	0	0	0
Otu01439	Bacteria(100)	Bacteroidetes(100)	Sphingobacteria(100)	Sphingobacteriales(100)	Chitinophagaceae(100)	Chitinophagaceae_unclassified(91)	0	0	0	0	0	0	0	0	0	0	0	0	0	4	0	0	0	0	0	0	0	0	0	0	0	0	0	0	0	0	0	0	0	0	0	0	0	0	0	0	17	0	0
Otu01440	Bacteria(100)	Proteobacteria(100)	Betaproteobacteria(100)	Betaproteobacteria_unclassified(100)	Betaproteobacteria_unclassified(100)	Betaproteobacteria_unclassified(100)	0	0	0	0	0	0	0	0	0	0	0	0	0	3	0	0	0	0	0	0	0	0	0	0	0	0	0	0	0	0	0	0	0	0	0	0	0	0	0	0	0	0	0
Otu01441	Bacteria(100)	Proteobacteria(100)	Alphaproteobacteria(100)	Rhizobiales(100)	Phyllobacteriaceae(99)	Phyllobacteriaceae_unclassified(99)	0	0	0	0	0	0	0	0	0	0	0	0	0	0	0	0	0	0	0	0	3	1	10	0	15	0	0	0	0	0	0	4	18	0	0	0	0	0	0	0	0	0	0
Otu01442	Bacteria(100)	Planctomycetes(100)	Planctomycetacia(100)	Planctomycetales(100)	Planctomycetaceae(100)	Singulisphaera(100)	0	0	0	0	0	0	0	0	0	0	0	0	0	0	0	0	0	0	0	0	0	0	0	0	0	0	0	0	0	0	0	0	0	0	0	0	0	121	0	0	0	0	0
Otu01443	Bacteria(100)	Acidobacteria(100)	Acidobacteria_Gp6(100)	Acidobacteria_Gp6_order_incertae_sedis(100)	Acidobacteria_Gp6_family_incertae_sedis(100)	Gp6(100)	2	0	0	0	0	0	0	0	0	0	0	0	0	0	0	0	0	0	0	0	0	0	0	0	0	0	0	0	0	0	0	0	0	0	0	0	0	0	0	0	0	0	0
Otu00984	Bacteria(100)	Proteobacteria(100)	Alphaproteobacteria(100)	Rhizobiales(100)	Brucellaceae(98)	Brucellaceae_unclassified(58)	0	0	8	0	4	0	0	0	0	0	0	0	0	0	0	0	0	0	0	0	1	0	0	0	2	0	0	0	0	0	0	0	0	0	0	0	0	0	0	0	6	0	0
Otu01409	Bacteria(100)	Bacteria_unclassified(99)	Bacteria_unclassified(99)	Bacteria_unclassified(99)	Bacteria_unclassified(99)	Bacteria_unclassified(99)	0	0	0	0	0	5	0	0	0	0	0	0	0	4	0	1	0	0	0	0	0	0	0	0	0	0	0	0	0	0	0	0	0	0	0	0	0	0	0	0	0	0	0
Otu01445	Bacteria(100)	Acidobacteria(100)	Acidobacteria_Gp1(100)	Acidobacteria_Gp1_order_incertae_sedis(100)	Acidobacteria_Gp1_family_incertae_sedis(100)	Gp1(100)	3	0	0	0	0	0	0	0	0	0	0	0	0	0	0	0	0	0	0	0	0	0	0	0	0	0	0	0	0	0	0	0	0	0	0	0	0	0	0	0	0	0	0
Otu01446	Bacteria(100)	Bacteroidetes(100)	Sphingobacteria(100)	Sphingobacteriales(100)	Cytophagaceae(100)	Sporocytophaga(100)	0	0	0	0	0	0	0	0	192	0	0	0	0	0	0	0	0	0	0	0	0	0	0	0	0	0	0	0	0	0	0	0	0	0	0	0	0	0	0	0	0	0	0
Otu01449	Bacteria(100)	Actinobacteria(100)	Actinobacteria(100)	Actinomycetales(100)	Actinomycetales_unclassified(94)	Actinomycetales_unclassified(94)	0	0	0	0	0	0	0	0	0	0	0	0	0	0	0	0	0	0	0	0	0	0	0	0	0	0	0	0	0	0	0	0	0	0	0	0	0	0	0	0	0	0	0
Otu01450	Bacteria(100)	Bacteria_unclassified(100)	Bacteria_unclassified(100)	Bacteria_unclassified(100)	Bacteria_unclassified(100)	Bacteria_unclassified(100)	0	0	0	0	0	0	0	0	0	0	0	0	0	0	0	0	0	0	0	0	0	0	0	0	0	0	0	0	0	0	0	0	0	0	0	0	0	0	0	0	0	0	0
Otu01451	Bacteria(100)	Proteobacteria(100)	Gammaproteobacteria(100)	Gammaproteobacteria_unclassified(100)	Gammaproteobacteria_unclassified(100)	Gammaproteobacteria_unclassified(100)	0	0	0	0	0	0	0	0	0	0	0	0	0	0	0	0	0	0	0	0	0	0	0	0	0	0	0	0	0	0	0	0	0	0	0	0	0	0	0	0	0	0	0
Otu01452	Bacteria(100)	Actinobacteria(100)	Actinobacteria(100)	Solirubrobacterales(100)	Conexibacteraceae(100)	Conexibacter(100)	0	0	0	0	0	0	0	0	0	0	0	0	0	0	0	0	0	0	0	0	0	0	0	0	0	0	0	0	0	0	0	0	0	0	0	3	0	0	0	0	12	0	44
Otu01453	Bacteria(100)	Proteobacteria(100)	Deltaproteobacteria(100)	Deltaproteobacteria_unclassified(100)	Deltaproteobacteria_unclassified(100)	Deltaproteobacteria_unclassified(100)	0	0	0	0	0	0	0	0	0	0	0	0	0	0	0	0	0	0	0	0	0	0	0	0	0	0	0	0	0	0	0	0	0	0	0	0	0	0	0	0	10	0	0
Otu01454	Bacteria(100)	Actinobacteria(100)	Actinobacteria(100)	Actinomycetales(100)	Actinomycetales_unclassified(99)	Actinomycetales_unclassified(99)	0	0	0	0	0	1	0	0	0	0	0	0	0	0	0	6	0	0	0	0	0	2	0	0	0	0	0	0	0	0	0	1	1	0	0	2	0	3	11	0	5	0	48
Otu01436	Bacteria(100)	Proteobacteria(100)	Gammaproteobacteria(100)	Legionellales(100)	Legionellaceae(100)	Legionella(100)	1	29	0	0	0	0	0	0	0	0	0	0	0	0	0	5	1	0	1	0	7	11	0	1	17	0	0	0	0	0	0	1	0	1	0	3	0	1	0	0	7	0	52
Otu01456	Bacteria(100)	Firmicutes(100)	Clostridia(100)	Clostridiales(100)	Clostridiales_unclassified(100)	Clostridiales_unclassified(100)	0	0	0	0	0	0	0	0	0	0	0	0	0	0	0	0	0	0	0	0	0	0	0	0	0	0	0	0	0	0	0	0	0	0	0	0	0	21	11	0	0	0	109
Otu01457	Bacteria(100)	Firmicutes(100)	Bacilli(100)	Bacillales(100)	Alicyclobacillaceae(100)	Tumebacillus(100)	0	0	0	0	0	0	1	0	0	0	0	0	0	0	0	0	0	0	0	0	0	0	0	0	0	0	0	0	0	0	0	0	0	0	0	0	0	0	0	0	0	0	0
Otu01459	Bacteria(100)	Bacteria_unclassified(100)	Bacteria_unclassified(100)	Bacteria_unclassified(100)	Bacteria_unclassified(100)	Bacteria_unclassified(100)	0	0	0	0	0	0	0	0	0	0	0	0	0	0	0	0	0	1	0	0	0	0	0	0	0	7	0	0	0	0	0	0	0	0	0	0	0	0	0	0	0	0	0
Otu01460	Bacteria(100)	Planctomycetes(100)	Planctomycetacia(100)	Planctomycetales(100)	Planctomycetaceae(100)	Singulisphaera(100)	0	0	0	0	0	0	0	0	0	0	0	0	0	0	0	0	0	0	0	0	0	0	0	2	2	0	0	0	0	0	0	0	0	0	0	0	0	180	0	0	0	0	0
Otu01461	Bacteria(100)	Firmicutes(100)	Bacilli(100)	Lactobacillales(100)	Lactobacillaceae(100)	Lactobacillus(100)	0	0	0	0	0	0	0	0	0	0	0	0	0	0	0	0	0	0	0	0	0	0	0	0	0	0	0	0	0	0	0	0	0	0	0	0	0	0	0	0	0	0	0
Otu01462	Bacteria(100)	Proteobacteria(100)	Alphaproteobacteria(100)	Rhodospirillales(100)	Acetobacteraceae(100)	Acidocella(100)	0	0	0	0	0	0	0	0	0	0	0	0	0	0	0	0	0	0	0	0	0	2	0	0	3	0	0	0	0	0	0	0	0	0	0	0	0	0	0	0	0	0	0
Otu01380	Bacteria(100)	Actinobacteria(100)	Actinobacteria(100)	Actinomycetales(100)	Pseudonocardiaceae(100)	Pseudonocardiaceae_unclassified(69)	0	0	0	0	0	0	0	5	0	0	0	0	0	40	0	0	0	0	0	0	0	0	0	0	0	0	0	0	0	0	0	0	0	0	0	0	0	0	0	0	2	0	74
Otu01463	Bacteria(100)	Actinobacteria(100)	Actinobacteria(100)	Actinomycetales(100)	Actinomycetales_unclassified(100)	Actinomycetales_unclassified(100)	0	0	0	0	0	0	0	0	0	0	0	0	0	0	0	6	0	0	0	0	0	0	0	0	0	0	0	0	0	0	0	0	0	0	0	0	0	43	73	0	15	0	23
Otu01465	Bacteria(100)	Proteobacteria(100)	Alphaproteobacteria(100)	Rhizobiales(100)	Hyphomicrobiaceae(100)	Devosia(100)	0	0	0	0	0	0	0	0	0	0	0	0	0	0	0	0	0	0	0	0	0	0	0	0	0	0	0	0	0	0	0	0	0	0	0	0	0	78	5	0	1	0	11
Otu01466	Bacteria(100)	Verrucomicrobia(54)	Verrucomicrobia_unclassified(54)	Verrucomicrobia_unclassified(54)	Verrucomicrobia_unclassified(54)	Verrucomicrobia_unclassified(54)	0	9	0	0	0	0	0	0	0	0	0	0	0	0	0	0	0	0	0	0	0	1	0	0	0	0	0	0	0	0	0	0	0	0	0	0	0	5	0	0	44	0	5
Otu01467	Bacteria(100)	Proteobacteria(100)	Alphaproteobacteria(100)	Rhodospirillales(100)	Acetobacteraceae(100)	Acetobacteraceae_unclassified(100)	0	1	0	0	0	0	0	0	0	0	0	0	0	0	0	0	0	0	0	0	0	0	0	0	0	0	0	0	0	0	0	0	0	0	0	0	0	5	51	0	0	0	0
Otu01468	Bacteria(100)	Bacteroidetes(100)	Bacteroidia(100)	Bacteroidales(100)	Porphyromonadaceae(100)	Porphyromonadaceae_unclassified(100)	0	0	0	0	0	0	0	0	0	0	0	0	0	1	0	0	0	0	0	0	0	0	0	0	0	0	0	0	0	0	0	0	0	0	0	0	0	0	0	0	0	0	0
Otu01469	Bacteria(100)	Proteobacteria(100)	Betaproteobacteria(100)	Betaproteobacteria_unclassified(100)	Betaproteobacteria_unclassified(100)	Betaproteobacteria_unclassified(100)	0	0	0	0	0	0	0	0	0	0	0	0	0	0	0	0	0	0	0	1	0	0	0	0	0	0	36	0	0	0	0	0	0	0	0	0	0	1	0	0	7	0	0
Otu01464	Bacteria(100)	Planctomycetes(99)	Planctomycetacia(99)	Planctomycetales(99)	Planctomycetaceae(99)	Planctomycetaceae_unclassified(99)	0	0	0	0	0	0	0	0	0	0	0	0	0	0	0	0	0	0	0	0	0	0	0	0	0	0	0	0	0	0	0	0	0	0	0	0	0	0	0	0	0	0	71
Otu01470	Bacteria(100)	Firmicutes(100)	Clostridia(100)	Clostridiales(100)	Lachnospiraceae(100)	Lachnospiraceae_unclassified(100)	0	0	0	0	0	0	0	0	0	0	0	0	0	0	0	0	0	0	0	0	0	0	0	0	0	0	0	0	0	0	0	0	0	0	0	0	0	0	0	0	0	0	0
Otu01471	Bacteria(100)	Bacteria_unclassified(93)	Bacteria_unclassified(93)	Bacteria_unclassified(93)	Bacteria_unclassified(93)	Bacteria_unclassified(93)	0	0	0	0	0	0	0	0	0	0	0	0	0	0	0	0	0	0	0	0	0	0	0	0	0	0	0	0	0	0	0	0	0	0	0	0	0	52	0	0	36	0	0
Otu01472	Bacteria(100)	Proteobacteria(100)	Alphaproteobacteria(100)	Rhodospirillales(100)	Acetobacteraceae(100)	Acetobacteraceae_unclassified(100)	0	0	0	0	0	0	0	0	0	0	0	0	0	0	0	0	0	0	0	0	0	0	0	0	0	0	0	0	0	0	0	0	0	0	0	0	0	0	0	0	113	0	0
Otu01473	Bacteria(100)	Firmicutes(100)	Clostridia(100)	Clostridiales(100)	Ruminococcaceae(100)	Ruminococcaceae_unclassified(100)	0	6	0	0	0	0	0	0	0	0	0	0	0	0	0	0	0	0	0	0	0	0	0	3	0	0	0	0	0	0	0	0	0	0	0	0	0	53	8	48	3	0	0
Otu01417	Bacteria(100)	Actinobacteria(100)	Actinobacteria(100)	Actinomycetales(100)	Streptomycetaceae(100)	Streptomyces(96)	0	0	2	0	0	0	0	0	4	0	0	0	0	0	0	0	0	0	0	0	4	0	0	0	0	0	0	0	0	0	0	0	0	0	0	0	0	9	0	0	0	0	0
Otu01474	Bacteria(100)	Actinobacteria(100)	Actinobacteria(100)	Solirubrobacterales(51)	Solirubrobacterales_unclassified(51)	Solirubrobacterales_unclassified(51)	0	0	0	0	0	0	0	0	0	0	0	0	0	0	0	4	0	2	0	0	0	0	0	0	0	0	0	0	0	0	0	12	0	0	0	0	0	0	12	0	11	0	75
Otu01475	Bacteria(100)	Gemmatimonadetes(100)	Gemmatimonadetes(100)	Gemmatimonadales(100)	Gemmatimonadaceae(100)	Gemmatimonas(100)	0	0	0	0	0	0	0	0	0	0	0	0	0	0	0	0	0	0	0	0	0	0	0	0	0	0	0	0	0	0	0	0	0	0	0	0	0	0	0	0	0	0	0
Otu01476	Bacteria(100)	Actinobacteria(100)	Actinobacteria(100)	Actinomycetales(100)	Nocardiaceae(99)	Nocardia(99)	0	0	0	0	0	0	0	0	0	0	0	0	0	0	0	0	0	0	0	0	0	0	0	0	0	0	0	0	0	0	0	0	0	0	0	0	0	0	0	0	0	0	0
Otu01477	Bacteria(100)	Firmicutes(100)	Clostridia(100)	Clostridiales(100)	Lachnospiraceae(100)	Lachnospiraceae_unclassified(100)	0	0	0	0	0	0	0	0	0	0	0	0	0	0	0	0	0	0	0	0	0	0	0	0	0	0	0	0	0	0	0	0	0	0	0	0	0	46	96	8	9	0	28
Otu01478	Bacteria(100)	Actinobacteria(100)	Actinobacteria(100)	Actinomycetales(100)	Corynebacteriaceae(100)	Corynebacterium(100)	0	0	0	0	0	0	0	0	0	0	0	0	0	0	0	0	0	0	0	0	0	0	0	0	0	0	0	0	0	0	0	0	0	0	0	0	0	0	0	0	0	0	0
Otu01479	Bacteria(100)	Proteobacteria(100)	Alphaproteobacteria(100)	Alphaproteobacteria_unclassified(100)	Alphaproteobacteria_unclassified(100)	Alphaproteobacteria_unclassified(100)	0	0	0	0	0	0	0	0	0	0	0	0	0	0	0	0	0	0	0	0	0	0	0	0	0	0	0	0	0	0	0	0	0	0	0	0	0	0	0	0	0	0	0
Otu01480	Bacteria(100)	Proteobacteria(100)	Betaproteobacteria(100)	Betaproteobacteria_unclassified(100)	Betaproteobacteria_unclassified(100)	Betaproteobacteria_unclassified(100)	0	0	0	0	0	0	0	0	0	0	0	0	0	0	0	0	0	0	0	0	0	0	0	0	0	0	0	0	0	0	0	0	0	0	0	0	0	0	0	0	0	0	0
Otu01481	Bacteria(100)	Actinobacteria(100)	Actinobacteria(100)	Actinomycetales(100)	Actinomycetales_unclassified(65)	Actinomycetales_unclassified(65)	0	1	0	0	0	0	0	0	0	0	0	0	0	0	0	0	0	0	0	0	0	0	0	0	0	0	0	0	0	0	0	0	1	0	0	6	0	24	8	0	44	0	14
Otu00991	Bacteria(100)	Firmicutes(100)	Bacilli(100)	Bacillales(100)	Paenibacillaceae_1(100)	Paenibacillus(100)	0	0	0	0	0	0	0	0	0	0	0	0	0	0	0	1	2	0	0	0	0	0	1	0	0	0	0	0	0	0	0	0	0	0	0	0	0	23	33	0	0	0	28
Otu01080	Bacteria(100)	Proteobacteria(100)	Alphaproteobacteria(100)	Sphingomonadales(100)	Sphingomonadaceae(100)	Sphingomonas(100)	0	2	0	0	0	0	1	0	0	0	0	0	0	0	0	0	0	0	0	0	0	0	0	0	0	0	0	0	0	0	0	0	0	0	0	0	0	45	0	0	10	0	27
Otu01444	Bacteria(100)	Proteobacteria(100)	Alphaproteobacteria(100)	Rhizobiales(100)	Beijerinckiaceae(85)	Beijerinckiaceae_unclassified(84)	0	0	0	0	0	0	0	0	0	0	0	0	0	0	0	0	0	0	0	10	5	25	1	3	6	0	0	0	0	0	0	0	0	0	0	0	0	2	0	0	2	0	0
Otu01482	Bacteria(100)	Bacteria_unclassified(97)	Bacteria_unclassified(97)	Bacteria_unclassified(97)	Bacteria_unclassified(97)	Bacteria_unclassified(97)	0	3	0	0	0	0	0	0	0	0	0	0	0	0	0	9	6	0	0	0	3	13	0	0	0	0	0	0	0	0	0	0	0	0	0	0	0	0	23	0	0	0	0
Otu01484	Bacteria(100)	Firmicutes(100)	Clostridia(100)	Clostridiales(100)	Lachnospiraceae(100)	Clostridium_XlVa(100)	0	0	0	0	0	0	0	0	0	0	0	0	0	0	0	0	0	0	0	0	0	0	0	0	0	0	0	0	0	0	0	0	0	0	0	0	0	0	0	0	0	0	0
Otu01485	Bacteria(100)	Firmicutes(100)	Erysipelotrichia(100)	Erysipelotrichales(100)	Erysipelotrichaceae(100)	Turicibacter(100)	0	0	0	0	0	0	0	0	0	0	0	0	0	5	0	0	0	0	0	0	0	0	0	0	0	0	0	0	0	0	0	0	0	0	0	0	0	0	0	0	0	0	0
Otu01486	Bacteria(100)	Bacteria_unclassified(100)	Bacteria_unclassified(100)	Bacteria_unclassified(100)	Bacteria_unclassified(100)	Bacteria_unclassified(100)	0	0	0	0	0	0	0	0	0	0	0	0	0	0	0	0	0	0	0	0	0	0	0	0	0	0	0	0	0	0	0	0	0	0	0	0	0	0	0	0	0	0	0
Otu01487	Bacteria(100)	Firmicutes(100)	Clostridia(100)	Clostridiales(100)	Clostridiales_unclassified(100)	Clostridiales_unclassified(100)	0	0	0	0	0	0	0	0	0	0	0	0	0	0	0	0	0	0	0	0	0	0	0	0	0	0	0	0	0	0	0	0	0	0	0	0	0	92	77	0	9	0	0
Otu01370	Bacteria(100)	Acidobacteria(65)	Acidobacteria_Gp16(65)	Acidobacteria_Gp16_order_incertae_sedis(65)	Acidobacteria_Gp16_family_incertae_sedis(65)	Gp16(65)	0	0	0	0	0	0	0	0	0	0	0	0	0	5	0	0	2	0	0	0	1	3	0	0	0	0	0	0	0	0	0	0	0	0	0	0	0	42	15	0	22	0	0
Otu01448	Bacteria(100)	Proteobacteria(100)	Alphaproteobacteria(100)	Rhizobiales(100)	Rhizobiales_unclassified(100)	Rhizobiales_unclassified(100)	0	0	0	0	0	0	0	0	0	0	0	0	0	0	0	0	0	0	0	0	0	0	0	0	0	0	0	0	0	0	0	0	0	0	0	0	0	103	30	0	14	0	2
Otu01455	Bacteria(100)	Bacteria_unclassified(100)	Bacteria_unclassified(100)	Bacteria_unclassified(100)	Bacteria_unclassified(100)	Bacteria_unclassified(100)	0	0	0	0	0	0	0	0	0	4	0	0	0	1	0	0	0	0	0	0	0	0	0	0	0	0	0	0	0	0	0	0	0	0	0	0	0	0	0	0	0	0	0
Otu01489	Bacteria(100)	Bacteroidetes(100)	Bacteroidetes_unclassified(100)	Bacteroidetes_unclassified(100)	Bacteroidetes_unclassified(100)	Bacteroidetes_unclassified(100)	0	0	0	0	0	0	0	0	0	0	0	0	0	0	0	0	0	0	0	0	0	0	0	0	0	0	0	0	0	0	0	0	0	0	0	0	0	0	0	0	0	0	0
Otu01491	Bacteria(100)	Bacteria_unclassified(100)	Bacteria_unclassified(100)	Bacteria_unclassified(100)	Bacteria_unclassified(100)	Bacteria_unclassified(100)	0	0	0	0	0	0	0	0	0	0	0	0	0	0	0	0	0	0	0	0	0	0	0	0	0	0	0	0	0	0	0	0	0	0	0	0	0	0	0	0	0	0	0
Otu01247	Bacteria(100)	Planctomycetes(93)	Planctomycetacia(93)	Planctomycetales(93)	Planctomycetaceae(93)	Planctomycetaceae_unclassified(93)	0	0	0	0	0	0	0	0	0	0	0	0	0	0	0	6	1	0	0	0	0	4	15	16	19	0	0	0	0	0	0	0	0	0	0	0	0	0	0	0	0	0	0
Otu01492	Bacteria(100)	Bacteroidetes(100)	Flavobacteria(100)	Flavobacteriales(100)	Flavobacteriaceae(100)	Flavobacterium(100)	0	0	0	0	0	0	0	0	0	0	0	0	0	9	0	0	0	0	0	0	0	0	0	0	0	0	0	0	0	0	0	0	0	0	0	0	0	0	0	0	0	0	17
Otu01447	Bacteria(100)	Proteobacteria(100)	Alphaproteobacteria(100)	Rhizobiales(100)	Hyphomicrobiaceae(100)	Pedomicrobium(72)	0	0	4	0	0	7	0	0	0	0	0	0	0	2	0	0	0	0	0	0	0	0	0	0	0	0	0	0	0	0	0	0	0	0	0	0	0	0	0	0	0	0	0
Otu01494	Bacteria(100)	Planctomycetes(100)	Planctomycetacia(100)	Planctomycetales(100)	Planctomycetaceae(100)	Planctomycetaceae_unclassified(100)	0	0	0	0	0	0	0	0	0	0	0	0	0	0	0	0	0	0	0	0	0	0	0	0	0	0	0	0	0	0	0	0	0	0	0	0	0	0	181	0	0	0	0
Otu01495	Bacteria(100)	Verrucomicrobia(100)	Verrucomicrobiae(100)	Verrucomicrobiales(100)	Verrucomicrobiaceae(100)	Verrucomicrobiaceae_unclassified(86)	0	0	0	0	0	0	0	0	0	0	0	0	0	0	0	0	0	0	0	0	2	0	0	0	0	0	0	0	0	0	0	0	0	0	0	0	0	0	0	0	0	0	0
Otu01496	Bacteria(100)	Bacteria_unclassified(100)	Bacteria_unclassified(100)	Bacteria_unclassified(100)	Bacteria_unclassified(100)	Bacteria_unclassified(100)	0	0	0	0	0	0	0	0	0	0	0	0	0	0	0	0	0	0	0	0	0	0	0	0	0	0	181	0	0	0	0	0	0	0	0	0	0	0	0	0	0	0	0
Otu01483	Bacteria(100)	Planctomycetes(100)	Planctomycetacia(100)	Planctomycetales(100)	Planctomycetaceae(100)	Planctomycetaceae_unclassified(100)	0	0	0	0	0	0	0	2	0	0	0	0	0	0	0	0	0	0	0	0	0	0	0	0	0	0	0	0	0	0	0	0	0	0	0	0	0	0	0	0	4	0	0
Otu01493	Bacteria(100)	Firmicutes(100)	Clostridia(100)	Clostridiales(100)	Ruminococcaceae(100)	Ruminococcaceae_unclassified(100)	0	0	0	0	0	0	0	0	0	0	0	0	0	0	0	0	0	0	0	0	0	0	0	0	0	0	0	0	0	0	0	0	0	0	0	0	0	0	0	0	0	0	0
Otu01497	Bacteria(100)	Actinobacteria(100)	Actinobacteria(100)	Acidimicrobiales(93)	Acidimicrobiales_unclassified(93)	Acidimicrobiales_unclassified(93)	0	0	0	0	0	0	2	0	0	0	0	0	0	0	0	10	5	5	0	0	2	9	5	0	0	0	0	0	0	0	0	0	0	0	0	0	0	21	11	0	16	0	0
Otu01498	Bacteria(100)	Bacteria_unclassified(100)	Bacteria_unclassified(100)	Bacteria_unclassified(100)	Bacteria_unclassified(100)	Bacteria_unclassified(100)	0	0	0	0	0	0	0	0	0	0	0	0	0	0	0	0	0	0	0	0	0	0	0	0	0	0	0	0	0	0	0	0	0	0	0	0	0	0	0	0	0	0	0
Otu01499	Bacteria(100)	Actinobacteria(100)	Actinobacteria(100)	Actinomycetales(100)	Nocardioidaceae(100)	Nocardioides(100)	0	0	0	0	0	0	0	0	0	0	0	0	0	0	11	0	0	0	0	0	0	0	0	1	0	0	43	0	0	0	0	0	0	0	0	0	0	1	0	0	0	0	0
Otu01500	Bacteria(100)	Firmicutes(100)	Clostridia(100)	Clostridiales(100)	Ruminococcaceae(100)	Ruminococcaceae_unclassified(100)	0	0	0	0	0	0	0	0	0	0	0	0	0	0	0	0	0	0	0	0	0	0	0	0	0	0	0	0	0	0	0	0	0	0	0	0	0	0	0	0	0	0	0
Otu01501	Bacteria(100)	Bacteroidetes(100)	Sphingobacteria(100)	Sphingobacteriales(100)	Chitinophagaceae(100)	Terrimonas(62)	0	0	2	0	0	0	0	0	0	0	0	0	0	15	0	0	0	0	0	0	2	0	0	0	0	0	0	0	0	0	0	0	0	0	0	0	0	64	0	0	0	0	0
Otu01502	Bacteria(100)	Planctomycetes(100)	Planctomycetacia(100)	Planctomycetales(100)	Planctomycetaceae(100)	Singulisphaera(100)	0	0	0	0	0	0	0	0	0	0	0	0	0	0	0	0	0	0	0	0	0	0	0	0	0	0	0	0	0	0	0	0	0	0	0	0	0	80	78	0	0	0	0
Otu01504	Bacteria(100)	Proteobacteria(100)	Alphaproteobacteria(100)	Rhodospirillales(100)	Acetobacteraceae(100)	Acetobacteraceae_unclassified(99)	0	0	0	0	0	0	0	0	0	0	0	0	0	0	0	0	0	0	0	0	0	0	0	0	0	0	0	0	0	0	0	0	0	0	0	0	0	0	0	0	1	0	0
Otu01428	Bacteria(100)	Proteobacteria(100)	Alphaproteobacteria(100)	Rhizobiales(100)	Rhizobiales_unclassified(98)	Rhizobiales_unclassified(98)	0	4	1	6	2	0	1	6	0	0	0	0	0	5	0	0	7	0	3	4	6	1	4	0	2	0	0	0	0	0	0	0	12	0	0	3	0	0	0	0	0	0	0
Otu01505	Bacteria(100)	Proteobacteria(100)	Deltaproteobacteria(100)	Myxococcales(100)	Cystobacteraceae(75)	Cystobacteraceae_unclassified(69)	0	0	0	0	0	60	0	0	0	0	0	0	0	0	0	1	0	0	0	0	0	0	0	0	0	0	0	0	0	0	0	0	0	0	0	2	0	0	0	0	0	0	0
Otu01507	Bacteria(100)	Armatimonadetes(100)	Armatimonadia(100)	Armatimonadales(100)	Armatimonadaceae(100)	Armatimonas_Armatimonadetes_gp1(100)	0	0	0	0	0	0	0	0	0	0	0	0	0	0	0	0	0	0	0	0	0	0	0	0	0	0	0	0	0	0	0	0	0	0	0	0	0	0	0	0	0	0	0
Otu01508	Bacteria(100)	Firmicutes(100)	Clostridia(100)	Clostridiales(100)	Ruminococcaceae(100)	Ruminococcaceae_unclassified(98)	0	0	0	0	0	0	0	0	0	0	0	0	0	0	5	0	0	0	0	0	0	0	0	0	0	0	0	0	0	0	0	0	0	0	0	0	0	0	0	0	0	0	0
Otu01509	Bacteria(100)	Bacteria_unclassified(100)	Bacteria_unclassified(100)	Bacteria_unclassified(100)	Bacteria_unclassified(100)	Bacteria_unclassified(100)	0	0	0	0	0	0	0	0	0	0	0	0	0	0	0	0	0	0	0	0	0	0	0	0	0	0	0	0	0	0	0	0	0	0	0	0	0	0	0	0	0	0	165
Otu01510	Bacteria(100)	Proteobacteria(100)	Gammaproteobacteria(100)	Oceanospirillales(100)	Oceanospirillaceae(100)	Marinospirillum(100)	0	0	0	0	0	0	0	0	0	0	0	0	0	0	0	0	0	1	0	1	0	0	0	0	0	0	0	0	0	0	0	0	0	0	0	0	0	0	0	0	0	0	0
Otu01488	Bacteria(100)	Proteobacteria(100)	Gammaproteobacteria(100)	Xanthomonadales(100)	Xanthomonadaceae(100)	Luteibacter(98)	0	0	4	0	0	0	0	0	0	0	0	0	0	1	0	0	0	0	0	0	0	0	0	2	6	1	10	0	0	0	0	0	0	0	0	0	0	2	0	0	4	0	0
Otu01512	Bacteria(100)	Proteobacteria(100)	Betaproteobacteria(100)	Betaproteobacteria_unclassified(100)	Betaproteobacteria_unclassified(100)	Betaproteobacteria_unclassified(100)	0	0	0	0	0	0	0	0	0	0	0	0	0	0	0	0	0	0	0	0	0	0	0	0	0	0	0	0	0	0	0	0	0	0	0	0	0	0	0	0	0	0	0
Otu01515	Bacteria(100)	Bacteroidetes(100)	Bacteroidetes_unclassified(99)	Bacteroidetes_unclassified(99)	Bacteroidetes_unclassified(99)	Bacteroidetes_unclassified(99)	0	0	0	0	0	0	0	0	0	0	0	0	0	0	0	0	0	0	0	0	0	2	0	4	0	0	7	0	0	0	0	0	0	0	0	0	0	0	0	0	0	0	0
Otu01516	Bacteria(100)	Acidobacteria(100)	Holophagae(100)	Holophagales(100)	Holophagaceae(100)	Holophagaceae_unclassified(99)	0	0	0	0	0	0	0	0	175	0	0	0	0	0	0	0	0	0	0	0	0	0	0	0	0	0	0	0	0	0	0	0	0	0	0	0	0	0	0	0	0	0	0
Otu01517	Bacteria(100)	Proteobacteria(100)	Alphaproteobacteria(100)	Rhizobiales(100)	Rhizobiales_unclassified(100)	Rhizobiales_unclassified(100)	0	0	0	0	0	0	0	0	0	0	0	0	0	0	0	0	0	0	0	0	0	0	0	0	0	0	0	0	0	0	0	0	0	0	0	0	0	77	72	0	20	0	0
Otu01519	Bacteria(100)	Planctomycetes(100)	Planctomycetacia(100)	Planctomycetales(100)	Planctomycetaceae(100)	Singulisphaera(100)	0	0	0	0	0	0	0	0	0	0	0	0	0	0	0	0	0	0	0	0	0	0	0	0	0	0	0	0	0	0	0	0	0	0	0	0	0	119	0	0	0	0	0
Otu01520	Bacteria(100)	Firmicutes(100)	Clostridia(100)	Clostridiales(100)	Clostridiales_unclassified(100)	Clostridiales_unclassified(100)	0	0	0	0	0	0	0	0	0	0	0	0	0	0	0	0	0	0	0	0	0	0	0	0	0	0	0	0	0	0	0	0	0	0	0	0	0	0	0	0	0	0	0
Otu01521	Bacteria(100)	Bacteroidetes(100)	Bacteroidia(100)	Bacteroidales(100)	Prevotellaceae(100)	Prevotella(100)	0	0	0	0	0	0	0	0	15	0	0	0	0	2	0	0	0	0	0	0	0	0	0	0	0	0	0	0	0	0	0	0	0	0	0	0	0	0	0	0	0	0	0
Otu01522	Bacteria(100)	Firmicutes(100)	Clostridia(100)	Clostridiales(100)	Lachnospiraceae(100)	Lachnospiraceae_unclassified(100)	0	0	0	0	0	0	0	0	0	0	0	0	0	0	0	0	0	0	0	0	0	0	0	0	0	0	0	0	0	0	0	0	0	0	0	0	0	0	47	0	0	0	0
Otu01523	Bacteria(100)	Acidobacteria(100)	Acidobacteria_Gp4(100)	Acidobacteria_Gp4_order_incertae_sedis(100)	Acidobacteria_Gp4_family_incertae_sedis(100)	Gp4(100)	0	0	0	0	0	0	0	0	0	0	0	0	0	0	0	0	0	0	0	0	0	0	0	0	0	0	0	0	0	0	0	0	0	0	0	0	0	0	0	0	0	0	0
Otu01524	Bacteria(100)	Planctomycetes(100)	Planctomycetacia(100)	Planctomycetales(100)	Planctomycetaceae(100)	Singulisphaera(100)	0	0	3	0	0	0	0	0	0	0	0	0	0	0	0	0	0	0	0	0	3	3	0	0	0	0	0	0	0	0	0	0	0	0	0	0	0	0	0	0	5	0	0
Otu01518	Bacteria(100)	Planctomycetes(100)	Planctomycetacia(100)	Planctomycetales(100)	Planctomycetaceae(100)	Planctomycetaceae_unclassified(77)	0	0	0	0	0	0	0	0	0	0	0	0	0	0	47	0	0	0	0	0	0	0	4	0	0	0	0	0	0	0	0	0	0	0	0	0	0	0	0	0	2	0	0
Otu01525	Bacteria(100)	Bacteroidetes(100)	Sphingobacteria(100)	Sphingobacteriales(100)	Chitinophagaceae(100)	Terrimonas(99)	0	0	0	0	0	0	0	0	0	0	0	0	0	3	0	0	0	0	0	0	0	0	0	0	0	0	0	0	0	0	0	0	0	0	0	0	0	0	0	0	0	0	0
Otu01526	Bacteria(100)	Firmicutes(100)	Clostridia(100)	Clostridiales(100)	Ruminococcaceae(100)	Ruminococcaceae_unclassified(100)	0	0	0	0	0	0	0	0	0	0	0	0	0	0	57	0	0	0	0	0	0	1	0	0	0	0	0	0	0	0	0	0	0	0	0	0	0	0	0	0	0	0	0
Otu01527	Bacteria(100)	Proteobacteria(100)	Betaproteobacteria(100)	Neisseriales(100)	Neisseriaceae(100)	Neisseriaceae_unclassified(100)	0	0	0	0	0	0	0	0	0	0	0	0	0	0	0	0	0	0	0	0	0	0	0	0	0	0	0	0	0	0	0	0	0	0	0	0	0	0	0	0	0	0	0
Otu01528	Bacteria(100)	Actinobacteria(100)	Actinobacteria(100)	Actinomycetales(100)	Pseudonocardiaceae(100)	Pseudonocardia(90)	0	3	0	0	0	4	0	0	0	0	0	0	0	0	0	0	0	0	0	0	0	0	0	0	0	0	0	0	0	0	0	0	0	0	0	0	2	2	7	0	11	0	45
Otu01529	Bacteria(100)	Bacteroidetes(100)	Bacteroidia(100)	Bacteroidales(100)	Rikenellaceae(100)	Rikenellaceae_unclassified(100)	0	0	0	0	0	0	0	0	0	0	0	0	0	0	0	0	0	0	0	0	0	0	0	0	0	0	0	0	0	0	0	0	0	0	0	0	171	0	0	0	0	0	0
Otu01530	Bacteria(100)	Bacteroidetes(100)	Bacteroidia(100)	Bacteroidales(100)	Prevotellaceae(100)	Prevotella(100)	0	0	0	0	0	0	0	0	0	0	0	0	0	5	0	0	0	0	0	0	0	0	0	0	0	0	0	0	0	0	0	0	0	0	0	0	0	0	0	0	0	0	0
Otu01531	Bacteria(100)	Proteobacteria(100)	Alphaproteobacteria(100)	Caulobacterales(100)	Caulobacteraceae(100)	Caulobacter(100)	0	0	0	0	0	0	1	0	0	0	0	0	0	0	0	0	0	0	0	0	0	0	0	0	0	0	0	0	0	0	0	0	0	0	0	0	0	0	0	0	12	0	0
Otu01532	Bacteria(100)	Bacteria_unclassified(100)	Bacteria_unclassified(100)	Bacteria_unclassified(100)	Bacteria_unclassified(100)	Bacteria_unclassified(100)	0	0	0	0	0	0	0	0	0	0	0	0	0	0	0	0	0	0	0	0	0	0	0	0	0	0	0	0	0	0	0	0	0	0	0	0	0	0	0	0	0	0	17
Otu01533	Bacteria(100)	Bacteroidetes(100)	Bacteroidetes_unclassified(100)	Bacteroidetes_unclassified(100)	Bacteroidetes_unclassified(100)	Bacteroidetes_unclassified(100)	0	0	0	0	0	3	0	0	0	0	0	0	0	0	15	0	0	0	0	0	0	0	0	0	0	0	0	0	0	0	0	0	0	0	0	0	0	0	0	0	0	0	0
Otu01534	Bacteria(100)	Bacteria_unclassified(100)	Bacteria_unclassified(100)	Bacteria_unclassified(100)	Bacteria_unclassified(100)	Bacteria_unclassified(100)	0	0	0	0	0	0	0	0	0	0	0	0	0	0	0	1	0	0	0	0	1	2	0	0	0	0	0	0	0	0	0	0	0	0	0	0	0	31	22	0	5	0	0
Otu01535	Bacteria(100)	Planctomycetes(100)	Planctomycetacia(100)	Planctomycetales(100)	Planctomycetaceae(100)	Singulisphaera(84)	0	0	0	0	0	0	0	0	0	0	0	0	0	0	0	0	0	0	0	0	0	2	0	0	0	0	0	0	0	0	0	0	0	0	0	0	0	0	26	0	0	0	17
Otu01536	Bacteria(100)	Proteobacteria(100)	Alphaproteobacteria(100)	Rhizobiales(100)	Rhizobiales_unclassified(100)	Rhizobiales_unclassified(100)	0	0	0	0	0	0	0	0	0	0	0	0	0	0	0	0	0	0	0	0	0	0	0	0	0	0	0	0	0	0	0	0	0	0	0	0	0	0	0	0	0	0	0
Otu01537	Bacteria(100)	Bacteroidetes(100)	Bacteroidetes_unclassified(100)	Bacteroidetes_unclassified(100)	Bacteroidetes_unclassified(100)	Bacteroidetes_unclassified(100)	0	0	0	0	0	0	0	0	0	0	0	0	0	0	0	0	0	0	0	0	0	0	0	0	0	0	0	0	0	0	0	0	0	0	0	0	0	0	0	0	0	0	9
Otu01538	Bacteria(100)	Bacteria_unclassified(100)	Bacteria_unclassified(100)	Bacteria_unclassified(100)	Bacteria_unclassified(100)	Bacteria_unclassified(100)	0	0	0	0	0	0	0	0	0	0	0	0	0	0	0	0	0	0	0	0	0	0	0	0	0	0	0	0	0	0	0	0	0	0	0	0	0	0	0	0	0	0	0
Otu01539	Bacteria(100)	Actinobacteria(100)	Actinobacteria(100)	Actinomycetales(100)	Actinomycetales_unclassified(100)	Actinomycetales_unclassified(100)	0	0	0	0	0	0	0	0	0	0	0	0	0	0	0	2	0	0	0	0	8	6	6	0	0	0	0	0	0	0	0	0	0	0	0	0	0	0	0	0	0	0	0
Otu01542	Bacteria(100)	Bacteria_unclassified(100)	Bacteria_unclassified(100)	Bacteria_unclassified(100)	Bacteria_unclassified(100)	Bacteria_unclassified(100)	0	0	0	0	0	0	0	0	0	0	0	0	0	0	0	0	0	0	0	0	0	0	0	0	0	0	0	0	0	0	0	0	0	0	0	0	0	0	0	0	0	0	0
Otu01543	Bacteria(100)	Verrucomicrobia(100)	Spartobacteria(100)	Spartobacteria_order_incertae_sedis(100)	Spartobacteria_family_incertae_sedis(100)	Spartobacteria_genera_incertae_sedis(100)	0	0	0	0	0	0	0	0	0	0	0	0	0	0	0	0	0	0	0	0	0	0	0	0	0	0	0	0	0	0	0	0	0	0	0	0	0	0	0	0	0	0	0
Otu01544	Bacteria(100)	Bacteroidetes(100)	Sphingobacteria(100)	Sphingobacteriales(100)	Chitinophagaceae(100)	Chitinophagaceae_unclassified(100)	0	0	3	0	0	0	0	0	0	0	0	0	0	0	0	0	0	0	0	0	0	0	0	0	0	0	0	0	0	0	0	0	0	0	0	0	0	0	0	0	0	0	0
Otu01545	Bacteria(100)	Firmicutes(100)	Clostridia(99)	Clostridiales(99)	Clostridiales_unclassified(99)	Clostridiales_unclassified(99)	0	0	0	0	0	0	0	0	0	0	0	0	0	0	0	0	0	0	0	0	0	0	0	0	0	0	0	0	0	0	0	0	0	0	0	0	0	0	0	0	0	0	0
Otu01546	Bacteria(100)	Planctomycetes(100)	Planctomycetacia(100)	Planctomycetales(100)	Planctomycetaceae(100)	Singulisphaera(100)	0	0	0	0	0	0	0	0	0	0	0	0	0	0	0	0	2	0	0	0	3	10	9	0	14	0	0	0	0	0	0	0	0	0	0	0	0	0	0	0	9	0	0
Otu01547	Bacteria(100)	Bacteria_unclassified(100)	Bacteria_unclassified(100)	Bacteria_unclassified(100)	Bacteria_unclassified(100)	Bacteria_unclassified(100)	0	0	0	0	0	0	0	0	0	0	0	0	0	0	0	0	0	0	0	0	0	0	0	0	0	0	0	0	0	0	0	0	0	0	0	0	0	0	0	0	0	0	0
Otu01540	Bacteria(100)	Proteobacteria(100)	Gammaproteobacteria(100)	Xanthomonadales(100)	Xanthomonadaceae(100)	Xanthomonadaceae_unclassified(94)	2	0	1	0	0	0	1	0	14	0	0	0	0	0	35	0	0	0	0	0	0	0	0	0	0	0	0	0	0	0	0	0	0	0	0	0	0	3	0	0	0	0	0
Otu01541	Bacteria(100)	Proteobacteria(100)	Alphaproteobacteria(100)	Rhizobiales(100)	Rhizobiales_unclassified(100)	Rhizobiales_unclassified(100)	0	0	0	0	0	0	0	0	0	0	0	0	0	0	0	0	0	0	0	0	0	0	0	0	0	0	0	0	0	0	0	0	0	0	0	0	0	0	0	0	17	0	0
Otu01549	Bacteria(100)	OD1(94)	OD1_class_incertae_sedis(94)	OD1_order_incertae_sedis(94)	OD1_family_incertae_sedis(94)	OD1_genus_incertae_sedis(94)	0	0	0	0	0	11	0	0	0	0	0	0	0	0	0	0	0	0	0	0	0	0	0	0	0	0	0	0	0	0	0	0	0	0	0	0	0	0	0	0	0	0	0
Otu01550	Bacteria(100)	Proteobacteria(100)	Alphaproteobacteria(100)	Rickettsiales(73)	Rickettsiaceae(73)	Rickettsiaceae_unclassified(73)	0	0	0	0	0	0	0	0	0	0	0	0	0	0	0	0	0	0	0	0	19	60	43	0	2	0	0	0	0	0	0	0	0	0	0	0	0	47	0	0	0	0	0
Otu01551	Bacteria(100)	Acidobacteria(98)	Acidobacteria_Gp1(98)	Acidobacteria_Gp1_order_incertae_sedis(98)	Acidobacteria_Gp1_family_incertae_sedis(98)	Gp1(98)	0	0	0	0	0	0	0	0	0	0	0	0	0	0	0	0	0	0	0	0	0	0	0	0	0	0	0	0	0	0	0	0	0	0	0	0	0	109	0	0	13	0	0
Otu01552	Bacteria(100)	Proteobacteria(100)	Proteobacteria_unclassified(100)	Proteobacteria_unclassified(100)	Proteobacteria_unclassified(100)	Proteobacteria_unclassified(100)	0	0	0	0	0	0	0	0	0	0	0	0	0	0	0	0	0	0	0	0	0	0	0	0	0	0	0	0	0	0	0	0	0	0	0	0	0	0	0	0	0	0	0
Otu01553	Bacteria(100)	Proteobacteria(100)	Gammaproteobacteria(100)	Gammaproteobacteria_unclassified(100)	Gammaproteobacteria_unclassified(100)	Gammaproteobacteria_unclassified(100)	0	0	6	0	0	0	0	0	0	0	0	0	0	0	0	0	0	0	0	0	0	0	0	0	0	0	0	0	0	0	0	0	0	0	0	0	0	42	0	0	37	0	7
Otu01554	Bacteria(100)	Bacteria_unclassified(100)	Bacteria_unclassified(100)	Bacteria_unclassified(100)	Bacteria_unclassified(100)	Bacteria_unclassified(100)	0	0	0	0	0	0	0	0	0	0	0	0	0	0	0	4	0	5	0	0	0	0	0	0	0	0	106	0	0	0	0	0	0	0	0	0	0	0	0	0	0	0	0
Otu01555	Bacteria(100)	Bacteria_unclassified(100)	Bacteria_unclassified(100)	Bacteria_unclassified(100)	Bacteria_unclassified(100)	Bacteria_unclassified(100)	0	0	0	0	0	0	0	0	0	0	0	0	0	0	0	0	0	0	0	0	0	0	0	0	0	0	0	0	0	0	0	0	0	0	0	0	0	0	0	0	0	0	0
Otu01558	Bacteria(100)	Actinobacteria(100)	Actinobacteria(100)	Actinomycetales(100)	Kineosporiaceae(68)	Kineosporia(66)	1	0	0	0	2	0	0	0	0	0	0	0	0	11	0	0	0	0	0	0	1	1	0	0	0	0	0	0	0	0	0	0	0	0	0	0	0	9	23	0	0	0	0
Otu01559	Bacteria(100)	Bacteroidetes(100)	Sphingobacteria(100)	Sphingobacteriales(100)	Chitinophagaceae(100)	Chitinophagaceae_unclassified(100)	0	0	0	0	0	0	0	0	0	0	0	0	0	0	0	0	0	0	0	0	0	0	0	0	0	0	0	0	0	0	0	0	0	0	0	0	0	86	0	0	6	0	0
Otu01560	Bacteria(100)	Bacteroidetes(100)	Sphingobacteria(100)	Sphingobacteriales(100)	Rhodothermaceae(100)	Rhodothermaceae_unclassified(100)	0	0	0	0	0	0	0	0	0	0	0	0	0	0	0	0	0	0	0	0	0	0	0	0	0	0	0	0	0	0	0	0	0	0	0	0	0	0	0	0	0	0	23
Otu01561	Bacteria(100)	Proteobacteria(100)	Deltaproteobacteria(100)	Myxococcales(100)	Myxococcales_unclassified(100)	Myxococcales_unclassified(100)	0	0	0	0	0	0	0	0	0	0	0	0	0	0	0	0	0	0	0	0	0	0	0	0	0	0	0	0	0	0	0	0	0	0	0	0	0	0	0	0	0	0	0
Otu01563	Bacteria(100)	Firmicutes(100)	Clostridia(100)	Clostridiales(100)	Lachnospiraceae(100)	Lachnospiraceae_unclassified(100)	0	0	0	0	0	0	0	0	0	0	0	0	0	0	0	6	15	0	0	9	15	61	0	1	23	0	0	0	0	0	0	0	0	0	0	0	0	0	0	0	0	0	0
Otu01564	Bacteria(100)	Bacteroidetes(100)	Flavobacteria(100)	Flavobacteriales(100)	Flavobacteriaceae(100)	Flavobacteriaceae_unclassified(100)	0	0	0	0	0	0	0	0	0	0	0	0	0	0	0	0	0	0	0	0	0	0	0	0	0	0	0	0	0	0	0	0	0	0	0	0	0	0	0	0	0	0	0
Otu00668	Bacteria(100)	Firmicutes(100)	Clostridia(100)	Clostridiales(100)	Lachnospiraceae(100)	Clostridium_XlVa(100)	1	1	0	0	0	0	0	2	0	0	0	0	0	0	0	9	1	0	5	0	1	4	0	0	0	0	0	0	0	0	0	0	0	0	0	0	0	0	0	0	0	0	0
Otu01566	Bacteria(100)	Bacteroidetes(100)	Bacteroidetes_unclassified(100)	Bacteroidetes_unclassified(100)	Bacteroidetes_unclassified(100)	Bacteroidetes_unclassified(100)	0	0	0	0	0	0	0	0	0	0	0	0	0	0	0	0	0	0	0	0	0	0	0	0	0	0	0	0	0	0	0	0	0	0	0	0	0	0	0	0	0	0	0
Otu01568	Bacteria(100)	Proteobacteria(100)	Alphaproteobacteria(100)	Alphaproteobacteria_unclassified(100)	Alphaproteobacteria_unclassified(100)	Alphaproteobacteria_unclassified(100)	0	0	0	0	0	0	0	0	0	0	0	0	0	0	0	0	0	0	0	0	0	0	0	0	0	0	0	0	0	0	0	0	0	0	0	0	0	0	0	0	0	0	0
Otu01569	Bacteria(100)	Proteobacteria(100)	Alphaproteobacteria(100)	Rhodospirillales(100)	Acetobacteraceae(100)	Acetobacteraceae_unclassified(100)	0	0	7	0	0	0	0	0	0	0	0	0	0	2	0	0	0	0	0	0	0	0	0	0	0	0	0	0	0	0	0	0	0	0	0	0	0	44	26	0	1	0	0
Otu01511	Bacteria(100)	Proteobacteria(100)	Alphaproteobacteria(100)	Rhizobiales(100)	Rhizobiales_unclassified(100)	Rhizobiales_unclassified(100)	0	0	0	0	0	0	0	0	0	0	0	0	0	0	0	0	0	0	0	0	0	0	0	0	0	0	0	0	0	0	0	0	0	0	0	0	0	0	0	0	0	0	0
Otu01570	Bacteria(100)	Bacteria_unclassified(100)	Bacteria_unclassified(100)	Bacteria_unclassified(100)	Bacteria_unclassified(100)	Bacteria_unclassified(100)	0	1	0	0	0	0	0	0	1	0	0	0	0	0	0	0	0	0	0	0	0	0	0	0	0	0	0	0	0	0	0	0	0	0	0	0	0	0	0	0	0	0	3
Otu01571	Bacteria(100)	Planctomycetes(100)	Planctomycetacia(100)	Planctomycetales(100)	Planctomycetaceae(100)	Singulisphaera(100)	0	0	0	1	0	0	0	0	0	0	0	0	0	0	0	0	0	0	0	0	0	0	0	0	0	0	0	0	0	0	0	0	0	0	0	0	0	0	37	0	0	0	0
Otu01572	Bacteria(100)	Firmicutes(100)	Clostridia(100)	Clostridiales(100)	Clostridiaceae_1(100)	Clostridium_sensu_stricto(100)	1	0	9	0	0	0	0	0	0	0	0	0	0	0	0	0	0	0	0	0	0	0	0	0	0	0	0	0	0	0	0	0	0	0	0	0	0	0	0	0	0	0	0
Otu01573	Bacteria(100)	Planctomycetes(100)	Planctomycetacia(100)	Planctomycetales(100)	Planctomycetaceae(100)	Singulisphaera(100)	0	0	0	0	0	0	0	0	0	0	0	0	0	0	0	0	0	0	0	0	0	0	0	0	0	0	0	0	0	0	0	0	0	0	0	0	0	0	0	0	0	0	0
Otu01574	Bacteria(100)	Proteobacteria(100)	Alphaproteobacteria(100)	Rhizobiales(100)	Rhizobiales_unclassified(100)	Rhizobiales_unclassified(100)	0	0	0	0	0	0	0	0	0	0	0	0	0	4	0	0	0	0	0	0	0	0	0	0	0	0	0	0	0	0	0	0	0	0	0	0	0	77	54	0	17	0	0
Otu01575	Bacteria(100)	Proteobacteria(100)	Alphaproteobacteria(100)	Rhodospirillales(100)	Acetobacteraceae(100)	Acetobacteraceae_unclassified(100)	0	0	0	0	0	0	0	0	0	0	0	0	0	0	0	0	0	0	0	0	0	0	0	0	0	0	0	0	0	0	0	0	0	0	0	0	0	4	118	0	1	0	45
Otu01548	Bacteria(100)	Verrucomicrobia(100)	Spartobacteria(100)	Spartobacteria_order_incertae_sedis(100)	Spartobacteria_family_incertae_sedis(100)	Spartobacteria_genera_incertae_sedis(100)	0	50	0	0	0	0	0	0	0	0	0	0	0	2	0	0	0	0	0	0	0	0	0	0	0	0	0	0	0	0	0	0	0	0	0	0	0	0	0	0	0	0	0
Otu01576	Bacteria(100)	Bacteroidetes(100)	Sphingobacteria(100)	Sphingobacteriales(100)	Sphingobacteriaceae(100)	Sphingobacteriaceae_unclassified(100)	0	42	0	0	0	0	0	0	0	0	0	0	0	0	0	0	0	0	0	0	0	0	0	0	0	0	0	0	0	0	0	0	0	0	0	0	0	19	0	0	0	0	0
Otu01577	Bacteria(100)	Bacteria_unclassified(100)	Bacteria_unclassified(100)	Bacteria_unclassified(100)	Bacteria_unclassified(100)	Bacteria_unclassified(100)	0	0	0	0	0	0	0	0	0	0	0	0	0	0	0	0	0	0	0	0	0	0	0	0	0	0	0	0	0	0	0	0	0	0	0	0	0	0	0	0	1	0	0
Otu01578	Bacteria(100)	Bacteroidetes(100)	Sphingobacteria(100)	Sphingobacteriales(100)	Chitinophagaceae(100)	Chitinophagaceae_unclassified(74)	0	0	0	0	0	0	0	0	0	0	0	0	0	12	0	0	0	0	0	0	0	0	0	0	0	0	0	0	0	0	0	0	0	0	0	0	0	1	0	0	0	0	0
Otu01579	Bacteria(100)	Proteobacteria(100)	Alphaproteobacteria(100)	Sphingomonadales(100)	Sphingomonadaceae(100)	Sphingomonas(98)	0	0	0	0	0	0	0	0	0	0	0	0	0	0	0	0	0	0	0	0	0	0	0	0	0	0	0	0	0	0	0	0	0	0	0	0	0	0	0	0	12	0	2
Otu01580	Bacteria(100)	Bacteroidetes(100)	Sphingobacteria(100)	Sphingobacteriales(100)	Sphingobacteriales_unclassified(83)	Sphingobacteriales_unclassified(83)	0	0	3	0	0	0	0	0	0	0	0	0	0	0	0	0	0	0	0	0	0	0	0	0	0	0	0	0	0	0	0	0	0	0	0	0	0	21	0	0	0	0	68
Otu01581	Bacteria(100)	Bacteria_unclassified(100)	Bacteria_unclassified(100)	Bacteria_unclassified(100)	Bacteria_unclassified(100)	Bacteria_unclassified(100)	0	0	0	0	0	0	0	0	0	0	0	0	0	0	0	0	0	0	0	0	0	0	0	0	0	0	0	0	0	0	0	0	0	0	0	0	0	0	0	0	0	0	0
Otu01582	Bacteria(100)	Bacteria_unclassified(100)	Bacteria_unclassified(100)	Bacteria_unclassified(100)	Bacteria_unclassified(100)	Bacteria_unclassified(100)	0	0	0	0	0	0	0	0	167	0	0	0	0	0	0	0	0	0	0	0	0	0	0	0	0	0	0	0	0	0	0	0	0	0	0	0	0	0	0	0	0	0	0
Otu01583	Bacteria(100)	Proteobacteria(100)	Proteobacteria_unclassified(100)	Proteobacteria_unclassified(100)	Proteobacteria_unclassified(100)	Proteobacteria_unclassified(100)	0	0	0	0	0	0	0	0	0	0	0	0	0	0	0	0	0	0	0	0	0	0	0	0	0	0	0	0	0	0	0	0	0	0	0	0	0	0	36	0	16	0	86
Otu01584	Bacteria(100)	Planctomycetes(100)	Planctomycetacia(100)	Planctomycetales(100)	Planctomycetaceae(100)	Planctomycetaceae_unclassified(100)	0	0	0	0	0	0	0	0	0	0	0	0	0	0	0	0	0	0	0	0	0	0	0	0	0	0	0	0	0	0	0	0	0	0	0	0	0	0	0	0	0	0	0
Otu01585	Bacteria(100)	Bacteria_unclassified(100)	Bacteria_unclassified(100)	Bacteria_unclassified(100)	Bacteria_unclassified(100)	Bacteria_unclassified(100)	0	0	0	0	0	0	0	0	0	0	0	0	0	0	0	0	0	0	0	0	0	0	0	0	0	0	0	0	0	0	0	0	0	0	0	0	0	0	0	0	0	0	0
Otu00423	Bacteria(100)	Firmicutes(100)	Negativicutes(100)	Selenomonadales(100)	Veillonellaceae(100)	Zymophilus(100)	0	0	0	0	0	0	0	0	2	0	0	0	0	0	0	0	0	0	0	0	0	0	0	0	0	0	0	0	0	0	0	0	0	0	0	0	0	0	0	0	0	0	0
Otu01514	Bacteria(100)	Proteobacteria(100)	Gammaproteobacteria(100)	Pseudomonadales(100)	Pseudomonadaceae(100)	Pseudomonadaceae_unclassified(100)	0	0	0	0	0	0	0	11	0	0	0	0	0	1	0	0	0	0	0	0	0	0	0	0	0	0	0	0	0	0	0	0	0	0	0	0	0	0	0	0	0	0	0
Otu01586	Bacteria(100)	Bacteroidetes(100)	Bacteroidia(100)	Bacteroidales(100)	Porphyromonadaceae(100)	Parabacteroides(100)	0	0	0	0	0	0	0	0	0	0	0	0	0	11	0	0	0	0	0	0	0	0	0	0	0	0	0	0	0	0	0	0	0	0	0	0	0	0	0	0	0	0	0
Otu01587	Bacteria(100)	Firmicutes(100)	Clostridia(100)	Clostridiales(100)	Lachnospiraceae(100)	Lachnospiraceae_unclassified(100)	0	0	0	0	0	0	0	0	0	0	0	0	0	0	0	0	0	0	0	0	0	0	0	0	0	0	0	0	0	0	0	0	0	0	0	0	0	0	0	0	0	0	0
Otu01588	Bacteria(100)	Bacteria_unclassified(100)	Bacteria_unclassified(100)	Bacteria_unclassified(100)	Bacteria_unclassified(100)	Bacteria_unclassified(100)	0	0	0	0	0	0	0	0	0	0	0	0	0	0	0	0	0	0	0	0	0	0	0	0	0	0	0	0	0	0	0	0	0	0	0	0	0	0	0	0	0	0	0
Otu01589	Bacteria(100)	Firmicutes(100)	Clostridia(100)	Clostridiales(100)	Clostridiaceae_1(100)	Clostridiaceae_1_unclassified(100)	0	0	0	0	0	0	0	0	0	0	0	0	0	0	0	0	0	0	0	0	0	0	0	0	0	0	0	0	0	0	0	0	0	0	0	0	0	0	0	0	0	0	0
Otu01590	Bacteria(100)	Proteobacteria(100)	Alphaproteobacteria(100)	Rhizobiales(100)	Rhizobiaceae(99)	Rhizobium(99)	0	0	0	0	0	0	0	0	0	0	0	0	0	0	0	0	5	0	0	0	0	0	0	0	0	0	0	0	0	0	0	0	0	0	0	0	0	0	0	0	0	0	0
Otu01591	Bacteria(100)	Bacteroidetes(100)	Bacteroidetes_unclassified(100)	Bacteroidetes_unclassified(100)	Bacteroidetes_unclassified(100)	Bacteroidetes_unclassified(100)	0	0	2	0	0	0	0	0	0	0	0	0	0	0	0	0	0	0	0	0	0	0	0	0	0	0	0	0	0	0	0	0	0	0	0	0	0	0	0	0	3	0	155
Otu01593	Bacteria(100)	Proteobacteria(100)	Proteobacteria_unclassified(100)	Proteobacteria_unclassified(100)	Proteobacteria_unclassified(100)	Proteobacteria_unclassified(100)	0	0	0	0	0	0	0	0	0	0	0	0	0	0	0	0	0	4	0	0	0	0	0	0	0	0	0	0	0	0	0	0	0	0	0	0	0	0	0	0	0	0	0
Otu01594	Bacteria(100)	Proteobacteria(100)	Betaproteobacteria(100)	Betaproteobacteria_unclassified(100)	Betaproteobacteria_unclassified(100)	Betaproteobacteria_unclassified(100)	0	0	0	0	0	0	0	0	0	0	0	0	0	0	0	0	0	0	0	0	0	0	0	0	5	0	18	0	0	0	0	0	0	0	0	0	0	84	0	0	0	0	0
Otu01275	Bacteria(100)	Actinobacteria(100)	Actinobacteria(100)	Solirubrobacterales(88)	Solirubrobacterales_unclassified(60)	Solirubrobacterales_unclassified(60)	0	21	1	0	0	21	0	19	0	0	0	0	0	0	0	2	1	0	4	0	1	2	0	0	1	0	0	0	0	0	0	2	0	0	0	1	0	0	0	0	0	0	0
Otu01595	Bacteria(100)	Proteobacteria(100)	Alphaproteobacteria(100)	Rhodobacterales(100)	Rhodobacteraceae(100)	Rhodobacteraceae_unclassified(60)	0	0	0	0	0	0	0	0	0	0	0	0	0	0	0	0	0	0	0	0	0	0	0	0	0	0	98	0	0	0	0	0	0	0	0	0	0	0	0	0	0	0	0
Otu01596	Bacteria(100)	Firmicutes(100)	Clostridia(100)	Clostridiales(100)	Clostridiales_unclassified(100)	Clostridiales_unclassified(100)	2	0	2	0	0	14	0	0	0	0	0	0	0	0	0	0	0	0	0	0	0	0	0	0	0	0	0	0	0	0	0	0	0	0	0	0	0	0	0	0	0	0	0
Otu01597	Bacteria(100)	Actinobacteria(100)	Actinobacteria(100)	Actinomycetales(100)	Actinomycetales_unclassified(100)	Actinomycetales_unclassified(100)	0	0	0	0	0	0	0	0	0	0	0	0	0	0	0	0	0	0	0	0	0	0	0	0	0	0	0	0	0	0	0	0	4	0	0	0	0	0	0	17	0	0	0
Otu01598	Bacteria(100)	Acidobacteria(100)	Acidobacteria_Gp11(100)	Acidobacteria_Gp11_order_incertae_sedis(100)	Acidobacteria_Gp11_family_incertae_sedis(100)	Gp11(100)	0	0	0	0	0	0	0	0	0	0	0	0	0	0	0	0	0	0	0	0	0	0	0	0	0	0	0	0	0	0	0	0	0	0	0	0	0	0	0	0	1	0	0
Otu01599	Bacteria(100)	Actinobacteria(100)	Actinobacteria(100)	Actinomycetales(100)	Pseudonocardiaceae(100)	Prauserella(77)	0	0	0	0	0	0	0	0	0	0	0	0	0	0	0	0	0	0	0	0	0	0	0	0	0	0	0	0	0	0	0	0	0	0	0	0	0	0	0	0	0	0	0
Otu01600	Bacteria(100)	Proteobacteria(100)	Alphaproteobacteria(100)	Rhodospirillales(100)	Acetobacteraceae(100)	Rhodopila(100)	0	0	0	0	0	0	0	0	0	0	0	0	0	0	0	0	0	0	0	0	0	0	0	0	0	0	0	0	0	0	0	0	0	0	0	0	0	0	163	0	0	0	0
Otu01601	Bacteria(100)	Bacteria_unclassified(100)	Bacteria_unclassified(100)	Bacteria_unclassified(100)	Bacteria_unclassified(100)	Bacteria_unclassified(100)	0	0	0	0	0	0	0	0	0	0	0	0	0	0	0	0	0	0	0	0	0	0	0	0	0	0	0	0	0	0	0	0	0	0	0	0	0	0	0	0	0	0	0
Otu01602	Bacteria(100)	Proteobacteria(100)	Proteobacteria_unclassified(100)	Proteobacteria_unclassified(100)	Proteobacteria_unclassified(100)	Proteobacteria_unclassified(100)	0	29	0	0	0	0	0	0	0	0	0	0	0	0	0	0	0	0	0	0	0	0	0	0	0	0	0	0	0	0	0	0	0	0	0	0	0	10	0	0	3	0	0
Otu01603	Bacteria(100)	Bacteria_unclassified(100)	Bacteria_unclassified(100)	Bacteria_unclassified(100)	Bacteria_unclassified(100)	Bacteria_unclassified(100)	0	0	0	0	0	0	0	0	0	0	0	0	0	0	0	0	0	0	0	0	0	0	0	0	0	0	0	0	0	0	0	0	0	0	0	0	0	0	0	0	0	0	0
Otu01604	Bacteria(100)	Proteobacteria(100)	Gammaproteobacteria(100)	Chromatiales(100)	Chromatiaceae(100)	Rheinheimera(100)	0	0	0	0	0	0	0	0	0	0	0	0	0	2	0	0	0	0	0	0	1	0	0	0	0	0	0	0	0	0	0	0	0	0	0	0	0	0	0	0	0	0	0
Otu01606	Bacteria(100)	Proteobacteria(100)	Alphaproteobacteria(100)	Rhizobiales(100)	Rhizobiales_unclassified(100)	Rhizobiales_unclassified(100)	0	1	0	0	0	0	0	0	0	0	0	0	0	0	0	0	0	0	0	0	0	0	0	0	0	0	0	0	0	0	0	0	0	0	0	0	0	38	8	0	0	0	0
Otu01607	Bacteria(100)	Proteobacteria(100)	Proteobacteria_unclassified(100)	Proteobacteria_unclassified(100)	Proteobacteria_unclassified(100)	Proteobacteria_unclassified(100)	0	0	0	0	0	0	0	0	0	0	0	0	0	0	0	0	0	0	0	0	0	0	0	0	0	0	0	0	0	0	0	0	0	0	0	0	0	35	2	0	0	50	0
Otu01608	Bacteria(100)	Bacteroidetes(100)	Sphingobacteria(100)	Sphingobacteriales(100)	Cytophagaceae(100)	Cytophagaceae_unclassified(100)	0	0	0	0	0	0	0	0	161	0	0	0	0	0	0	0	0	0	0	0	0	0	0	0	0	0	0	0	0	0	0	0	0	0	0	0	0	2	0	0	0	0	0
Otu01609	Bacteria(100)	Bacteria_unclassified(100)	Bacteria_unclassified(100)	Bacteria_unclassified(100)	Bacteria_unclassified(100)	Bacteria_unclassified(100)	0	0	0	0	0	0	0	0	0	0	0	0	0	0	0	0	0	0	0	0	0	0	0	0	0	0	0	0	0	0	0	0	0	0	0	0	0	0	0	0	0	0	0
Otu01513	Bacteria(100)	Actinobacteria(100)	Actinobacteria(100)	Coriobacteriales(100)	Coriobacteriaceae(100)	Coriobacteriaceae_unclassified(70)	0	68	0	0	0	0	0	0	0	0	0	0	0	0	0	6	1	0	3	0	0	0	0	0	0	0	0	0	0	0	0	0	0	0	0	0	0	0	0	0	0	0	0
Otu01557	Bacteria(100)	Proteobacteria(100)	Alphaproteobacteria(100)	Rhodobacterales(99)	Rhodobacteraceae(99)	Rhodobacter(68)	2	8	0	0	0	0	1	0	0	0	0	0	0	0	0	1	1	1	0	0	0	1	0	0	0	0	0	0	0	0	0	0	0	0	0	0	0	0	0	0	16	0	9
Otu01610	Bacteria(100)	Proteobacteria(100)	Alphaproteobacteria(100)	Rhizobiales(100)	Methylocystaceae(96)	Methylocystaceae_unclassified(96)	0	2	2	0	0	0	0	0	0	0	0	0	0	0	0	2	0	11	1	0	0	0	0	0	0	0	0	0	0	0	0	0	0	0	0	0	0	92	0	0	0	0	0
Otu01611	Bacteria(100)	Proteobacteria(100)	Alphaproteobacteria(100)	Rhizobiales(100)	Hyphomicrobiaceae(100)	Rhodomicrobium(100)	0	0	0	0	0	0	0	0	0	0	0	0	0	0	0	1	5	0	0	0	0	5	0	0	4	0	0	0	0	0	0	0	0	0	0	0	0	0	0	0	0	0	0
Otu01612	Bacteria(100)	Planctomycetes(100)	Planctomycetacia(100)	Planctomycetales(100)	Planctomycetaceae(100)	Planctomycetaceae_unclassified(97)	0	0	0	0	0	0	0	0	0	0	0	0	0	0	0	0	0	0	0	0	0	15	0	0	0	0	0	0	0	0	0	0	0	0	0	0	0	27	0	0	8	0	0
Otu01613	Bacteria(100)	Actinobacteria(100)	Actinobacteria(100)	Actinomycetales(100)	Kineosporiaceae(100)	Angustibacter(100)	0	0	0	0	0	0	0	0	0	0	0	0	0	0	0	5	0	0	0	0	0	0	0	0	0	0	0	0	0	0	0	0	0	0	0	0	0	0	25	0	0	0	0
Otu01615	Bacteria(100)	Firmicutes(100)	Clostridia(100)	Clostridiales(100)	Lachnospiraceae(100)	Lachnospiraceae_unclassified(100)	0	0	0	0	0	0	0	0	0	0	0	0	0	0	0	0	0	0	0	0	0	0	0	0	0	0	0	0	0	0	0	0	0	0	0	0	0	0	0	0	0	0	0
Otu01616	Bacteria(100)	Firmicutes(100)	Clostridia(100)	Clostridiales(100)	Eubacteriaceae(100)	Eubacterium(100)	0	0	0	0	0	0	0	0	0	0	0	0	0	0	0	0	0	0	0	0	0	0	0	0	0	0	0	0	0	0	0	0	0	0	0	0	0	0	0	0	0	0	0
Otu01617	Bacteria(100)	Proteobacteria(100)	Proteobacteria_unclassified(100)	Proteobacteria_unclassified(100)	Proteobacteria_unclassified(100)	Proteobacteria_unclassified(100)	0	0	0	0	0	0	0	0	0	0	0	0	0	0	0	0	0	0	0	0	0	0	0	0	0	0	0	0	0	0	0	0	0	0	0	0	0	0	63	0	11	0	0
Otu01618	Bacteria(100)	Bacteria_unclassified(100)	Bacteria_unclassified(100)	Bacteria_unclassified(100)	Bacteria_unclassified(100)	Bacteria_unclassified(100)	2	0	0	0	0	0	0	0	0	0	0	0	0	0	0	0	0	0	0	0	0	0	0	0	0	0	0	0	0	0	0	0	0	0	0	0	0	0	0	0	0	0	0
Otu01619	Bacteria(100)	Proteobacteria(100)	Deltaproteobacteria(100)	Bdellovibrionales(100)	Bacteriovoracaceae(100)	Bacteriovorax(100)	0	0	0	0	0	1	0	0	0	0	0	0	0	0	0	0	0	0	0	0	0	0	0	0	0	0	58	0	0	0	0	0	0	0	0	0	0	0	0	0	45	0	0
Otu01620	Bacteria(100)	Proteobacteria(100)	Alphaproteobacteria(100)	Sphingomonadales(100)	Sphingomonadaceae(100)	Sphingomonas(100)	0	11	0	0	0	0	0	0	0	15	0	0	0	0	0	0	0	0	0	0	0	0	0	0	0	0	0	0	0	0	0	0	0	0	0	0	0	0	0	0	4	0	0
Otu01621	Bacteria(100)	Bacteria_unclassified(100)	Bacteria_unclassified(100)	Bacteria_unclassified(100)	Bacteria_unclassified(100)	Bacteria_unclassified(100)	0	0	0	0	0	0	0	0	0	0	0	0	0	0	0	0	0	0	0	0	0	0	0	0	0	0	0	0	0	0	0	0	0	0	0	0	0	0	0	0	0	0	0
Otu01622	Bacteria(100)	Planctomycetes(100)	Planctomycetacia(100)	Planctomycetales(100)	Planctomycetaceae(100)	Singulisphaera(100)	0	0	0	0	0	0	0	0	0	0	0	0	0	0	0	0	0	0	0	0	0	0	0	0	0	0	0	0	0	0	0	0	0	0	0	0	0	102	43	0	0	0	0
Otu01623	Bacteria(100)	Bacteria_unclassified(100)	Bacteria_unclassified(100)	Bacteria_unclassified(100)	Bacteria_unclassified(100)	Bacteria_unclassified(100)	0	0	0	0	0	0	0	0	0	0	0	0	0	0	0	1	0	0	0	0	1	0	0	0	0	0	0	0	0	0	0	0	0	0	0	0	0	0	0	0	0	0	0
Otu01624	Bacteria(100)	Bacteria_unclassified(97)	Bacteria_unclassified(97)	Bacteria_unclassified(97)	Bacteria_unclassified(97)	Bacteria_unclassified(97)	0	0	0	0	0	0	0	0	0	0	0	0	0	0	0	0	0	0	0	0	0	0	0	0	0	0	0	0	0	0	0	0	0	0	0	0	0	0	0	0	0	0	0
[truncated: 14,171 more rows]
[truncated: 121 more columns]

## Sheet: Table S4_Loading values
	PC1	PC2	PC3	PC4	PC5	PC6	PC7	PC8	PC9	PC10	PC11	PC12	PC13	PC14	PC15	PC16	PC17	PC18	PC19	PC20	PC21	PC22	PC23	PC24	PC25	PC26	PC27	PC28	PC29	PC30	PC31	PC32	PC33	PC34	PC35	PC36	PC37	PC38	PC39	PC40	PC41	PC42	PC43	PC44	PC45	PC46	PC47	PC48	PC49
[truncated: 200 more rows]
[truncated: 100 more columns]
